# Supplementary material for: Rational correction of pathogenic conformational defects in HTRA1
Source: PubMed Central journal article supplement (PMC11252331; doi:10.1038/s41467-024-49982-8), 2024-07-16
Supplement: 41467_2024_49982_MOESM16_ESM.pdf [file 41467_2024_49982_MOESM16_ESM.pdf]

|    |      |    |      |     |   |   |        |         |        |      |      |      |
|----|------|----|------|-----|---|---|--------|---------|--------|------|------|------|
| 1  | ATOM | 1  | N    | GLY | P | 1 | 3.936  | -19.380 | 8.669  | 0.00 | 0.00 | PROA |
| 2  | ATOM | 2  | HT1  | GLY | P | 1 | 3.290  | -19.159 | 7.884  | 0.00 | 0.00 | PROA |
| 3  | ATOM | 3  | HT2  | GLY | P | 1 | 3.882  | -20.401 | 8.863  | 0.00 | 0.00 | PROA |
| 4  | ATOM | 4  | HT3  | GLY | P | 1 | 4.891  | -19.011 | 8.488  | 0.00 | 0.00 | PROA |
| 5  | ATOM | 5  | CA   | GLY | P | 1 | 3.433  | -18.571 | 9.803  | 0.00 | 0.00 | PROA |
| 6  | ATOM | 6  | HA1  | GLY | P | 1 | 3.981  | -18.870 | 10.684 | 0.00 | 0.00 | PROA |
| 7  | ATOM | 7  | HA2  | GLY | P | 1 | 2.400  | -18.778 | 10.038 | 0.00 | 0.00 | PROA |
| 8  | ATOM | 8  | C    | GLY | P | 1 | 3.845  | -17.012 | 9.630  | 0.00 | 0.00 | PROA |
| 9  | ATOM | 9  | O    | GLY | P | 1 | 3.548  | -16.410 | 8.577  | 0.00 | 0.00 | PROA |
| 10 | ATOM | 10 | N    | GLN | P | 2 | 4.657  | -16.445 | 10.601 | 0.00 | 0.00 | PROA |
| 11 | ATOM | 11 | HN   | GLN | P | 2 | 4.776  | -16.885 | 11.487 | 0.00 | 0.00 | PROA |
| 12 | ATOM | 12 | CA   | GLN | P | 2 | 5.098  | -15.034 | 10.507 | 0.00 | 0.00 | PROA |
| 13 | ATOM | 13 | HA   | GLN | P | 2 | 5.399  | -14.895 | 9.479  | 0.00 | 0.00 | PROA |
| 14 | ATOM | 14 | CB   | GLN | P | 2 | 3.913  | -14.060 | 10.714 | 0.00 | 0.00 | PROA |
| 15 | ATOM | 15 | HB1  | GLN | P | 2 | 3.276  | -14.465 | 9.899  | 0.00 | 0.00 | PROA |
| 16 | ATOM | 16 | HB2  | GLN | P | 2 | 4.245  | -13.052 | 10.384 | 0.00 | 0.00 | PROA |
| 17 | ATOM | 17 | CG   | GLN | P | 2 | 3.164  | -14.019 | 12.085 | 0.00 | 0.00 | PROA |
| 18 | ATOM | 18 | HG1  | GLN | P | 2 | 3.780  | -13.297 | 12.664 | 0.00 | 0.00 | PROA |
| 19 | ATOM | 19 | HG2  | GLN | P | 2 | 2.974  | -15.011 | 12.547 | 0.00 | 0.00 | PROA |
| 20 | ATOM | 20 | CD   | GLN | P | 2 | 1.767  | -13.351 | 11.985 | 0.00 | 0.00 | PROA |
| 21 | ATOM | 21 | OE1  | GLN | P | 2 | 0.848  | -13.704 | 12.707 | 0.00 | 0.00 | PROA |
| 22 | ATOM | 22 | NE2  | GLN | P | 2 | 1.552  | -12.353 | 11.147 | 0.00 | 0.00 | PROA |
| 23 | ATOM | 23 | HE21 | GLN | P | 2 | 0.650  | -11.924 | 11.200 | 0.00 | 0.00 | PROA |
| 24 | ATOM | 24 | HE22 | GLN | P | 2 | 2.239  | -11.793 | 10.685 | 0.00 | 0.00 | PROA |
| 25 | ATOM | 25 | C    | GLN | P | 2 | 6.303  | -14.696 | 11.409 | 0.00 | 0.00 | PROA |
| 26 | ATOM | 26 | O    | GLN | P | 2 | 6.824  | -13.554 | 11.400 | 0.00 | 0.00 | PROA |
| 27 | ATOM | 27 | N    | GLU | P | 3 | 6.922  | -15.641 | 12.209 | 0.00 | 0.00 | PROA |
| 28 | ATOM | 28 | HN   | GLU | P | 3 | 6.680  | -16.608 | 12.181 | 0.00 | 0.00 | PROA |
| 29 | ATOM | 29 | CA   | GLU | P | 3 | 8.044  | -15.296 | 13.111 | 0.00 | 0.00 | PROA |
| 30 | ATOM | 30 | HA   | GLU | P | 3 | 7.823  | -14.294 | 13.448 | 0.00 | 0.00 | PROA |
| 31 | ATOM | 31 | CB   | GLU | P | 3 | 8.092  | -16.386 | 14.219 | 0.00 | 0.00 | PROA |
| 32 | ATOM | 32 | HB1  | GLU | P | 3 | 9.042  | -16.401 | 14.794 | 0.00 | 0.00 | PROA |
| 33 | ATOM | 33 | HB2  | GLU | P | 3 | 8.150  | -17.384 | 13.733 | 0.00 | 0.00 | PROA |
| 34 | ATOM | 34 | CG   | GLU | P | 3 | 6.927  | -16.368 | 15.202 | 0.00 | 0.00 | PROA |
| 35 | ATOM | 35 | HG1  | GLU | P | 3 | 5.975  | -16.305 | 14.633 | 0.00 | 0.00 | PROA |
| 36 | ATOM | 36 | HG2  | GLU | P | 3 | 6.739  | -15.457 | 15.808 | 0.00 | 0.00 | PROA |
| 37 | ATOM | 37 | CD   | GLU | P | 3 | 6.803  | -17.605 | 16.014 | 0.00 | 0.00 | PROA |
| 38 | ATOM | 38 | OE1  | GLU | P | 3 | 6.005  | -18.451 | 15.588 | 0.00 | 0.00 | PROA |
| 39 | ATOM | 39 | OE2  | GLU | P | 3 | 7.400  | -17.757 | 17.134 | 0.00 | 0.00 | PROA |
| 40 | ATOM | 40 | C    | GLU | P | 3 | 9.423  | -15.236 | 12.405 | 0.00 | 0.00 | PROA |
| 41 | ATOM | 41 | O    | GLU | P | 3 | 9.626  | -15.788 | 11.325 | 0.00 | 0.00 | PROA |
| 42 | ATOM | 42 | N    | ASP | P | 4 | 10.451 | -14.508 | 12.966 | 0.00 | 0.00 | PROA |
| 43 | ATOM | 43 | HN   | ASP | P | 4 | 10.377 | -13.998 | 13.819 | 0.00 | 0.00 | PROA |
| 44 | ATOM | 44 | CA   | ASP | P | 4 | 11.707 | -14.246 | 12.447 | 0.00 | 0.00 | PROA |
| 45 | ATOM | 45 | HA   | ASP | P | 4 | 11.533 | -13.953 | 11.422 | 0.00 | 0.00 | PROA |
| 46 | ATOM | 46 | CB   | ASP | P | 4 | 12.438 | -13.071 | 13.302 | 0.00 | 0.00 | PROA |
| 47 | ATOM | 47 | HB1  | ASP | P | 4 | 13.541 | -13.176 | 13.210 | 0.00 | 0.00 | PROA |
| 48 | ATOM | 48 | HB2  | ASP | P | 4 | 12.155 | -13.185 | 14.370 | 0.00 | 0.00 | PROA |
| 49 | ATOM | 49 | CG   | ASP | P | 4 | 12.134 | -11.644 | 12.953 | 0.00 | 0.00 | PROA |
| 50 | ATOM | 50 | OD1  | ASP | P | 4 | 12.555 | -10.767 | 13.791 | 0.00 | 0.00 | PROA |
| 51 | ATOM | 51 | OD2  | ASP | P | 4 | 11.806 | -11.403 | 11.761 | 0.00 | 0.00 | PROA |
| 52 | ATOM | 52 | C    | ASP | P | 4 | 12.677 | -15.508 | 12.293 | 0.00 | 0.00 | PROA |
| 53 | ATOM | 53 | O    | ASP | P | 4 | 13.434 | -15.471 | 11.358 | 0.00 | 0.00 | PROA |
| 54 | ATOM | 54 | N    | PRO | P | 5 | 12.626 | -16.504 | 13.193 | 0.00 | 0.00 | PROA |
| 55 | ATOM | 55 | CD   | PRO | P | 5 | 13.234 | -17.854 | 12.837 | 0.00 | 0.00 | PROA |
| 56 | ATOM | 56 | HD1  | PRO | P | 5 | 14.345 | -17.851 | 12.859 | 0.00 | 0.00 | PROA |
| 57 | ATOM | 57 | HD2  | PRO | P | 5 | 12.744 | -18.204 | 11.904 | 0.00 | 0.00 | PROA |
| 58 | ATOM | 58 | CA   | PRO | P | 5 | 12.299 | -16.491 | 14.635 | 0.00 | 0.00 | PROA |
| 59 | ATOM | 59 | HA   | PRO | P | 5 | 11.229 | -16.443 | 14.773 | 0.00 | 0.00 | PROA |
| 60 | ATOM | 60 | CB   | PRO | P | 5 | 12.640 | -17.909 | 15.102 | 0.00 | 0.00 | PROA |
| 61 | ATOM | 61 | HB1  | PRO | P | 5 | 11.884 | -18.349 | 15.787 | 0.00 | 0.00 | PROA |
| 62 | ATOM | 62 | HB2  | PRO | P | 5 | 13.618 | -17.965 | 15.627 | 0.00 | 0.00 | PROA |
| 63 | ATOM | 63 | CG   | PRO | P | 5 | 12.761 | -18.717 | 13.908 | 0.00 | 0.00 | PROA |
| 64 | ATOM | 64 | HG1  | PRO | P | 5 | 13.581 | -19.453 | 14.045 | 0.00 | 0.00 | PROA |
| 65 | ATOM | 65 | HG2  | PRO | P | 5 | 11.868 | -19.303 | 13.603 | 0.00 | 0.00 | PROA |
| 66 | ATOM | 66 | C    | PRO | P | 5 | 13.003 | -15.422 | 15.556 | 0.00 | 0.00 | PROA |
| 67 | ATOM | 67 | O    | PRO | P | 5 | 14.188 | -15.081 | 15.390 | 0.00 | 0.00 | PROA |
| 68 | ATOM | 68 | N    | ASN | P | 6 | 12.268 | -14.865 | 16.526 | 0.00 | 0.00 | PROA |
| 69 | ATOM | 69 | HN   | ASN | P | 6 | 11.344 | -15.160 | 16.758 | 0.00 | 0.00 | PROA |
| 70 | ATOM | 70 | CA   | ASN | P | 6 | 12.666 | -13.756 | 17.400 | 0.00 | 0.00 | PROA |
| 71 | ATOM | 71 | HA   | ASN | P | 6 | 12.734 | -12.854 | 16.810 | 0.00 | 0.00 | PROA |
| 72 | ATOM | 72 | CB   | ASN | P | 6 | 11.754 | -13.509 | 18.571 | 0.00 | 0.00 | PROA |
| 73 | ATOM | 73 | HB1  | ASN | P | 6 | 12.102 | -12.629 | 19.152 | 0.00 | 0.00 | PROA |

|     |      |     |      |     |   |    |        |         |        |      |      |      |
|-----|------|-----|------|-----|---|----|--------|---------|--------|------|------|------|
| 74  | ATOM | 74  | HB2  | ASN | P | 6  | 11.729 | -14.314 | 19.336 | 0.00 | 0.00 | PROA |
| 75  | ATOM | 75  | CG   | ASN | P | 6  | 10.395 | -13.159 | 18.048 | 0.00 | 0.00 | PROA |
| 76  | ATOM | 76  | OD1  | ASN | P | 6  | 10.126 | -12.007 | 17.585 | 0.00 | 0.00 | PROA |
| 77  | ATOM | 77  | ND2  | ASN | P | 6  | 9.387  | -14.074 | 18.070 | 0.00 | 0.00 | PROA |
| 78  | ATOM | 78  | HD21 | ASN | P | 6  | 9.608  | -15.047 | 18.007 | 0.00 | 0.00 | PROA |
| 79  | ATOM | 79  | HD22 | ASN | P | 6  | 8.540  | -13.737 | 17.661 | 0.00 | 0.00 | PROA |
| 80  | ATOM | 80  | C    | ASN | P | 6  | 14.033 | -13.815 | 17.951 | 0.00 | 0.00 | PROA |
| 81  | ATOM | 81  | O    | ASN | P | 6  | 14.329 | -14.823 | 18.657 | 0.00 | 0.00 | PROA |
| 82  | ATOM | 82  | N    | SER | P | 7  | 14.886 | -12.739 | 17.708 | 0.00 | 0.00 | PROA |
| 83  | ATOM | 83  | HN   | SER | P | 7  | 14.432 | -11.922 | 17.360 | 0.00 | 0.00 | PROA |
| 84  | ATOM | 84  | CA   | SER | P | 7  | 16.277 | -12.594 | 17.942 | 0.00 | 0.00 | PROA |
| 85  | ATOM | 85  | HA   | SER | P | 7  | 16.534 | -11.596 | 17.621 | 0.00 | 0.00 | PROA |
| 86  | ATOM | 86  | CB   | SER | P | 7  | 16.491 | -12.563 | 19.483 | 0.00 | 0.00 | PROA |
| 87  | ATOM | 87  | HB1  | SER | P | 7  | 16.670 | -13.569 | 19.920 | 0.00 | 0.00 | PROA |
| 88  | ATOM | 88  | HB2  | SER | P | 7  | 15.595 | -12.081 | 19.929 | 0.00 | 0.00 | PROA |
| 89  | ATOM | 89  | OG   | SER | P | 7  | 17.743 | -11.947 | 19.717 | 0.00 | 0.00 | PROA |
| 90  | ATOM | 90  | HG1  | SER | P | 7  | 17.910 | -12.000 | 20.661 | 0.00 | 0.00 | PROA |
| 91  | ATOM | 91  | C    | SER | P | 7  | 17.200 | -13.470 | 17.175 | 0.00 | 0.00 | PROA |
| 92  | ATOM | 92  | O    | SER | P | 7  | 18.343 | -13.012 | 16.923 | 0.00 | 0.00 | PROA |
| 93  | ATOM | 93  | N    | LEU | P | 8  | 16.874 | -14.707 | 16.860 | 0.00 | 0.00 | PROA |
| 94  | ATOM | 94  | HN   | LEU | P | 8  | 16.036 | -15.130 | 17.195 | 0.00 | 0.00 | PROA |
| 95  | ATOM | 95  | CA   | LEU | P | 8  | 17.642 | -15.544 | 15.920 | 0.00 | 0.00 | PROA |
| 96  | ATOM | 96  | HA   | LEU | P | 8  | 18.665 | -15.637 | 16.254 | 0.00 | 0.00 | PROA |
| 97  | ATOM | 97  | CB   | LEU | P | 8  | 16.965 | -16.951 | 16.078 | 0.00 | 0.00 | PROA |
| 98  | ATOM | 98  | HB1  | LEU | P | 8  | 15.980 | -17.017 | 15.569 | 0.00 | 0.00 | PROA |
| 99  | ATOM | 99  | HB2  | LEU | P | 8  | 16.789 | -17.084 | 17.167 | 0.00 | 0.00 | PROA |
| 100 | ATOM | 100 | CG   | LEU | P | 8  | 17.748 | -18.150 | 15.567 | 0.00 | 0.00 | PROA |
| 101 | ATOM | 101 | HG   | LEU | P | 8  | 17.927 | -18.098 | 14.472 | 0.00 | 0.00 | PROA |
| 102 | ATOM | 102 | CD1  | LEU | P | 8  | 19.144 | -18.369 | 16.194 | 0.00 | 0.00 | PROA |
| 103 | ATOM | 103 | HD11 | LEU | P | 8  | 19.046 | -18.701 | 17.250 | 0.00 | 0.00 | PROA |
| 104 | ATOM | 104 | HD12 | LEU | P | 8  | 19.740 | -17.440 | 16.072 | 0.00 | 0.00 | PROA |
| 105 | ATOM | 105 | HD13 | LEU | P | 8  | 19.621 | -19.243 | 15.701 | 0.00 | 0.00 | PROA |
| 106 | ATOM | 106 | CD2  | LEU | P | 8  | 16.764 | -19.346 | 15.768 | 0.00 | 0.00 | PROA |
| 107 | ATOM | 107 | HD21 | LEU | P | 8  | 16.298 | -19.250 | 16.772 | 0.00 | 0.00 | PROA |
| 108 | ATOM | 108 | HD22 | LEU | P | 8  | 17.303 | -20.299 | 15.577 | 0.00 | 0.00 | PROA |
| 109 | ATOM | 109 | HD23 | LEU | P | 8  | 16.005 | -19.184 | 14.973 | 0.00 | 0.00 | PROA |
| 110 | ATOM | 110 | C    | LEU | P | 8  | 17.674 | -15.282 | 14.428 | 0.00 | 0.00 | PROA |
| 111 | ATOM | 111 | O    | LEU | P | 8  | 18.745 | -15.164 | 13.860 | 0.00 | 0.00 | PROA |
| 112 | ATOM | 112 | N    | ARG | P | 9  | 16.458 | -14.988 | 13.819 | 0.00 | 0.00 | PROA |
| 113 | ATOM | 113 | HN   | ARG | P | 9  | 15.579 | -14.905 | 14.282 | 0.00 | 0.00 | PROA |
| 114 | ATOM | 114 | CA   | ARG | P | 9  | 16.391 | -14.390 | 12.486 | 0.00 | 0.00 | PROA |
| 115 | ATOM | 115 | HA   | ARG | P | 9  | 15.347 | -14.381 | 12.212 | 0.00 | 0.00 | PROA |
| 116 | ATOM | 116 | CB   | ARG | P | 9  | 16.952 | -12.954 | 12.445 | 0.00 | 0.00 | PROA |
| 117 | ATOM | 117 | HB1  | ARG | P | 9  | 16.638 | -12.556 | 11.456 | 0.00 | 0.00 | PROA |
| 118 | ATOM | 118 | HB2  | ARG | P | 9  | 18.048 | -12.932 | 12.624 | 0.00 | 0.00 | PROA |
| 119 | ATOM | 119 | CG   | ARG | P | 9  | 16.214 | -12.004 | 13.438 | 0.00 | 0.00 | PROA |
| 120 | ATOM | 120 | HG1  | ARG | P | 9  | 16.298 | -12.506 | 14.426 | 0.00 | 0.00 | PROA |
| 121 | ATOM | 121 | HG2  | ARG | P | 9  | 15.176 | -11.762 | 13.127 | 0.00 | 0.00 | PROA |
| 122 | ATOM | 122 | CD   | ARG | P | 9  | 17.025 | -10.781 | 13.656 | 0.00 | 0.00 | PROA |
| 123 | ATOM | 123 | HD1  | ARG | P | 9  | 17.046 | -10.195 | 12.712 | 0.00 | 0.00 | PROA |
| 124 | ATOM | 124 | HD2  | ARG | P | 9  | 18.051 | -11.089 | 13.951 | 0.00 | 0.00 | PROA |
| 125 | ATOM | 125 | NE   | ARG | P | 9  | 16.325 | -9.986  | 14.745 | 0.00 | 0.00 | PROA |
| 126 | ATOM | 126 | HE   | ARG | P | 9  | 15.475 | -10.288 | 15.178 | 0.00 | 0.00 | PROA |
| 127 | ATOM | 127 | CZ   | ARG | P | 9  | 16.548 | -8.695  | 14.891 | 0.00 | 0.00 | PROA |
| 128 | ATOM | 128 | NH1  | ARG | P | 9  | 17.317 | -7.978  | 14.130 | 0.00 | 0.00 | PROA |
| 129 | ATOM | 129 | HH11 | ARG | P | 9  | 17.566 | -7.039  | 14.369 | 0.00 | 0.00 | PROA |
| 130 | ATOM | 130 | HH12 | ARG | P | 9  | 17.717 | -8.419  | 13.326 | 0.00 | 0.00 | PROA |
| 131 | ATOM | 131 | NH2  | ARG | P | 9  | 16.080 | -8.069  | 15.960 | 0.00 | 0.00 | PROA |
| 132 | ATOM | 132 | HH21 | ARG | P | 9  | 15.876 | -8.644  | 16.753 | 0.00 | 0.00 | PROA |
| 133 | ATOM | 133 | HH22 | ARG | P | 9  | 16.267 | -7.091  | 16.044 | 0.00 | 0.00 | PROA |
| 134 | ATOM | 134 | C    | ARG | P | 9  | 16.875 | -15.265 | 11.440 | 0.00 | 0.00 | PROA |
| 135 | ATOM | 135 | O    | ARG | P | 9  | 18.034 | -15.074 | 10.989 | 0.00 | 0.00 | PROA |
| 136 | ATOM | 136 | N    | HSD | P | 10 | 16.096 | -16.291 | 10.966 | 0.00 | 0.00 | PROA |
| 137 | ATOM | 137 | HN   | HSD | P | 10 | 15.128 | -16.290 | 11.204 | 0.00 | 0.00 | PROA |
| 138 | ATOM | 138 | CA   | HSD | P | 10 | 16.508 | -17.291 | 10.013 | 0.00 | 0.00 | PROA |
| 139 | ATOM | 139 | HA   | HSD | P | 10 | 17.472 | -17.016 | 9.611  | 0.00 | 0.00 | PROA |
| 140 | ATOM | 140 | CB   | HSD | P | 10 | 16.649 | -18.687 | 10.570 | 0.00 | 0.00 | PROA |
| 141 | ATOM | 141 | HB1  | HSD | P | 10 | 16.813 | -19.533 | 9.869  | 0.00 | 0.00 | PROA |
| 142 | ATOM | 142 | HB2  | HSD | P | 10 | 15.717 | -18.831 | 11.158 | 0.00 | 0.00 | PROA |
| 143 | ATOM | 143 | ND1  | HSD | P | 10 | 18.165 | -19.815 | 12.400 | 0.00 | 0.00 | PROA |
| 144 | ATOM | 144 | HD1  | HSD | P | 10 | 17.657 | -20.676 | 12.425 | 0.00 | 0.00 | PROA |
| 145 | ATOM | 145 | CG   | HSD | P | 10 | 17.913 | -18.769 | 11.486 | 0.00 | 0.00 | PROA |
| 146 | ATOM | 146 | CE1  | HSD | P | 10 | 19.432 | -19.594 | 12.824 | 0.00 | 0.00 | PROA |

|     |      |     |      |     |   |    |        |         |        |      |      |      |
|-----|------|-----|------|-----|---|----|--------|---------|--------|------|------|------|
| 147 | ATOM | 147 | HE1  | HSD | P | 10 | 19.881 | -20.327 | 13.495 | 0.00 | 0.00 | PROA |
| 148 | ATOM | 148 | NE2  | HSD | P | 10 | 19.966 | -18.505 | 12.332 | 0.00 | 0.00 | PROA |
| 149 | ATOM | 149 | CD2  | HSD | P | 10 | 19.003 | -17.985 | 11.530 | 0.00 | 0.00 | PROA |
| 150 | ATOM | 150 | HD2  | HSD | P | 10 | 19.145 | -17.122 | 10.891 | 0.00 | 0.00 | PROA |
| 151 | ATOM | 151 | C    | HSD | P | 10 | 15.513 | -17.269 | 8.812  | 0.00 | 0.00 | PROA |
| 152 | ATOM | 152 | O    | HSD | P | 10 | 15.481 | -18.165 | 8.033  | 0.00 | 0.00 | PROA |
| 153 | ATOM | 153 | N    | LYS | P | 11 | 14.602 | -16.260 | 8.687  | 0.00 | 0.00 | PROA |
| 154 | ATOM | 154 | HN   | LYS | P | 11 | 14.660 | -15.609 | 9.440  | 0.00 | 0.00 | PROA |
| 155 | ATOM | 155 | CA   | LYS | P | 11 | 13.471 | -16.250 | 7.775  | 0.00 | 0.00 | PROA |
| 156 | ATOM | 156 | HA   | LYS | P | 11 | 12.938 | -17.182 | 7.894  | 0.00 | 0.00 | PROA |
| 157 | ATOM | 157 | CB   | LYS | P | 11 | 12.616 | -15.001 | 8.078  | 0.00 | 0.00 | PROA |
| 158 | ATOM | 158 | HB1  | LYS | P | 11 | 13.242 | -14.142 | 7.753  | 0.00 | 0.00 | PROA |
| 159 | ATOM | 159 | HB2  | LYS | P | 11 | 12.448 | -14.857 | 9.167  | 0.00 | 0.00 | PROA |
| 160 | ATOM | 160 | CG   | LYS | P | 11 | 11.272 | -14.996 | 7.335  | 0.00 | 0.00 | PROA |
| 161 | ATOM | 161 | HG1  | LYS | P | 11 | 10.835 | -16.016 | 7.379  | 0.00 | 0.00 | PROA |
| 162 | ATOM | 162 | HG2  | LYS | P | 11 | 11.347 | -14.659 | 6.279  | 0.00 | 0.00 | PROA |
| 163 | ATOM | 163 | CD   | LYS | P | 11 | 10.405 | -13.950 | 8.078  | 0.00 | 0.00 | PROA |
| 164 | ATOM | 164 | HD1  | LYS | P | 11 | 10.391 | -14.324 | 9.124  | 0.00 | 0.00 | PROA |
| 165 | ATOM | 165 | HD2  | LYS | P | 11 | 9.383  | -14.196 | 7.717  | 0.00 | 0.00 | PROA |
| 166 | ATOM | 166 | CE   | LYS | P | 11 | 10.842 | -12.587 | 7.805  | 0.00 | 0.00 | PROA |
| 167 | ATOM | 167 | HE1  | LYS | P | 11 | 10.433 | -12.167 | 6.861  | 0.00 | 0.00 | PROA |
| 168 | ATOM | 168 | HE2  | LYS | P | 11 | 11.906 | -12.268 | 7.828  | 0.00 | 0.00 | PROA |
| 169 | ATOM | 169 | NZ   | LYS | P | 11 | 10.135 | -11.864 | 8.835  | 0.00 | 0.00 | PROA |
| 170 | ATOM | 170 | HZ1  | LYS | P | 11 | 10.335 | -10.858 | 8.663  | 0.00 | 0.00 | PROA |
| 171 | ATOM | 171 | HZ2  | LYS | P | 11 | 10.435 | -12.105 | 9.801  | 0.00 | 0.00 | PROA |
| 172 | ATOM | 172 | HZ3  | LYS | P | 11 | 9.096  | -11.870 | 8.784  | 0.00 | 0.00 | PROA |
| 173 | ATOM | 173 | C    | LYS | P | 11 | 13.766 | -16.215 | 6.269  | 0.00 | 0.00 | PROA |
| 174 | ATOM | 174 | O    | LYS | P | 11 | 13.101 | -16.841 | 5.448  | 0.00 | 0.00 | PROA |
| 175 | ATOM | 175 | N    | TYR | P | 12 | 14.826 | -15.548 | 5.789  | 0.00 | 0.00 | PROA |
| 176 | ATOM | 176 | HN   | TYR | P | 12 | 15.532 | -15.165 | 6.379  | 0.00 | 0.00 | PROA |
| 177 | ATOM | 177 | CA   | TYR | P | 12 | 15.008 | -15.265 | 4.356  | 0.00 | 0.00 | PROA |
| 178 | ATOM | 178 | HA   | TYR | P | 12 | 14.086 | -15.453 | 3.825  | 0.00 | 0.00 | PROA |
| 179 | ATOM | 179 | CB   | TYR | P | 12 | 15.616 | -13.817 | 4.050  | 0.00 | 0.00 | PROA |
| 180 | ATOM | 180 | HB1  | TYR | P | 12 | 15.702 | -13.769 | 2.944  | 0.00 | 0.00 | PROA |
| 181 | ATOM | 181 | HB2  | TYR | P | 12 | 16.515 | -13.684 | 4.689  | 0.00 | 0.00 | PROA |
| 182 | ATOM | 182 | CG   | TYR | P | 12 | 14.662 | -12.741 | 4.417  | 0.00 | 0.00 | PROA |
| 183 | ATOM | 183 | CD1  | TYR | P | 12 | 14.691 | -12.293 | 5.747  | 0.00 | 0.00 | PROA |
| 184 | ATOM | 184 | HD1  | TYR | P | 12 | 15.474 | -12.626 | 6.412  | 0.00 | 0.00 | PROA |
| 185 | ATOM | 185 | CE1  | TYR | P | 12 | 13.820 | -11.317 | 6.187  | 0.00 | 0.00 | PROA |
| 186 | ATOM | 186 | HE1  | TYR | P | 12 | 13.873 | -11.000 | 7.218  | 0.00 | 0.00 | PROA |
| 187 | ATOM | 187 | CZ   | TYR | P | 12 | 12.816 | -10.778 | 5.309  | 0.00 | 0.00 | PROA |
| 188 | ATOM | 188 | OH   | TYR | P | 12 | 11.828 | -9.995  | 5.772  | 0.00 | 0.00 | PROA |
| 189 | ATOM | 189 | HH   | TYR | P | 12 | 11.368 | -9.564  | 5.048  | 0.00 | 0.00 | PROA |
| 190 | ATOM | 190 | CD2  | TYR | P | 12 | 13.813 | -12.106 | 3.529  | 0.00 | 0.00 | PROA |
| 191 | ATOM | 191 | HD2  | TYR | P | 12 | 13.740 | -12.492 | 2.523  | 0.00 | 0.00 | PROA |
| 192 | ATOM | 192 | CE2  | TYR | P | 12 | 12.847 | -11.169 | 3.998  | 0.00 | 0.00 | PROA |
| 193 | ATOM | 193 | HE2  | TYR | P | 12 | 12.023 | -10.990 | 3.323  | 0.00 | 0.00 | PROA |
| 194 | ATOM | 194 | C    | TYR | P | 12 | 15.870 | -16.369 | 3.781  | 0.00 | 0.00 | PROA |
| 195 | ATOM | 195 | O    | TYR | P | 12 | 15.918 | -16.557 | 2.560  | 0.00 | 0.00 | PROA |
| 196 | ATOM | 196 | N    | ASN | P | 13 | 16.387 | -17.240 | 4.688  | 0.00 | 0.00 | PROA |
| 197 | ATOM | 197 | HN   | ASN | P | 13 | 16.381 | -17.075 | 5.671  | 0.00 | 0.00 | PROA |
| 198 | ATOM | 198 | CA   | ASN | P | 13 | 16.938 | -18.529 | 4.296  | 0.00 | 0.00 | PROA |
| 199 | ATOM | 199 | HA   | ASN | P | 13 | 17.460 | -18.549 | 3.350  | 0.00 | 0.00 | PROA |
| 200 | ATOM | 200 | CB   | ASN | P | 13 | 17.977 | -18.930 | 5.265  | 0.00 | 0.00 | PROA |
| 201 | ATOM | 201 | HB1  | ASN | P | 13 | 18.217 | -20.014 | 5.280  | 0.00 | 0.00 | PROA |
| 202 | ATOM | 202 | HB2  | ASN | P | 13 | 17.409 | -18.553 | 6.143  | 0.00 | 0.00 | PROA |
| 203 | ATOM | 203 | CG   | ASN | P | 13 | 19.271 | -18.158 | 5.089  | 0.00 | 0.00 | PROA |
| 204 | ATOM | 204 | OD1  | ASN | P | 13 | 19.550 | -17.407 | 6.031  | 0.00 | 0.00 | PROA |
| 205 | ATOM | 205 | ND2  | ASN | P | 13 | 20.023 | -18.385 | 3.988  | 0.00 | 0.00 | PROA |
| 206 | ATOM | 206 | HD21 | ASN | P | 13 | 19.849 | -19.198 | 3.432  | 0.00 | 0.00 | PROA |
| 207 | ATOM | 207 | HD22 | ASN | P | 13 | 20.962 | -18.044 | 3.944  | 0.00 | 0.00 | PROA |
| 208 | ATOM | 208 | C    | ASN | P | 13 | 15.846 | -19.582 | 4.115  | 0.00 | 0.00 | PROA |
| 209 | ATOM | 209 | O    | ASN | P | 13 | 16.007 | -20.405 | 3.177  | 0.00 | 0.00 | PROA |
| 210 | ATOM | 210 | N    | PHE | P | 14 | 14.700 | -19.482 | 4.788  | 0.00 | 0.00 | PROA |
| 211 | ATOM | 211 | HN   | PHE | P | 14 | 14.766 | -19.140 | 5.722  | 0.00 | 0.00 | PROA |
| 212 | ATOM | 212 | CA   | PHE | P | 14 | 13.368 | -20.086 | 4.490  | 0.00 | 0.00 | PROA |
| 213 | ATOM | 213 | HA   | PHE | P | 14 | 13.481 | -21.156 | 4.592  | 0.00 | 0.00 | PROA |
| 214 | ATOM | 214 | CB   | PHE | P | 14 | 12.234 | -19.857 | 5.568  | 0.00 | 0.00 | PROA |
| 215 | ATOM | 215 | HB1  | PHE | P | 14 | 11.407 | -20.571 | 5.369  | 0.00 | 0.00 | PROA |
| 216 | ATOM | 216 | HB2  | PHE | P | 14 | 11.829 | -18.825 | 5.484  | 0.00 | 0.00 | PROA |
| 217 | ATOM | 217 | CG   | PHE | P | 14 | 12.620 | -20.146 | 7.063  | 0.00 | 0.00 | PROA |
| 218 | ATOM | 218 | CD1  | PHE | P | 14 | 11.803 | -19.544 | 8.059  | 0.00 | 0.00 | PROA |
| 219 | ATOM | 219 | HD1  | PHE | P | 14 | 10.923 | -18.990 | 7.768  | 0.00 | 0.00 | PROA |

|     |      |     |      |     |   |    |        |         |        |      |      |      |
|-----|------|-----|------|-----|---|----|--------|---------|--------|------|------|------|
| 220 | ATOM | 220 | CE1  | PHE | P | 14 | 12.167 | -19.758 | 9.400  | 0.00 | 0.00 | PROA |
| 221 | ATOM | 221 | HE1  | PHE | P | 14 | 11.585 | -19.264 | 10.164 | 0.00 | 0.00 | PROA |
| 222 | ATOM | 222 | CZ   | PHE | P | 14 | 13.328 | -20.568 | 9.737  | 0.00 | 0.00 | PROA |
| 223 | ATOM | 223 | HZ   | PHE | P | 14 | 13.588 | -20.667 | 10.780 | 0.00 | 0.00 | PROA |
| 224 | ATOM | 224 | CD2  | PHE | P | 14 | 13.743 | -21.003 | 7.393  | 0.00 | 0.00 | PROA |
| 225 | ATOM | 225 | HD2  | PHE | P | 14 | 14.266 | -21.406 | 6.538  | 0.00 | 0.00 | PROA |
| 226 | ATOM | 226 | CE2  | PHE | P | 14 | 14.084 | -21.142 | 8.757  | 0.00 | 0.00 | PROA |
| 227 | ATOM | 227 | HE2  | PHE | P | 14 | 15.018 | -21.663 | 8.905  | 0.00 | 0.00 | PROA |
| 228 | ATOM | 228 | C    | PHE | P | 14 | 12.823 | -19.771 | 3.058  | 0.00 | 0.00 | PROA |
| 229 | ATOM | 229 | O    | PHE | P | 14 | 12.476 | -20.724 | 2.341  | 0.00 | 0.00 | PROA |
| 230 | ATOM | 230 | N    | ILE | P | 15 | 12.854 | -18.483 | 2.682  | 0.00 | 0.00 | PROA |
| 231 | ATOM | 231 | HN   | ILE | P | 15 | 13.081 | -17.779 | 3.350  | 0.00 | 0.00 | PROA |
| 232 | ATOM | 232 | CA   | ILE | P | 15 | 12.656 | -18.053 | 1.368  | 0.00 | 0.00 | PROA |
| 233 | ATOM | 233 | HA   | ILE | P | 15 | 11.654 | -18.400 | 1.161  | 0.00 | 0.00 | PROA |
| 234 | ATOM | 234 | CB   | ILE | P | 15 | 12.591 | -16.542 | 1.182  | 0.00 | 0.00 | PROA |
| 235 | ATOM | 235 | HB   | ILE | P | 15 | 13.528 | -16.110 | 1.592  | 0.00 | 0.00 | PROA |
| 236 | ATOM | 236 | CG2  | ILE | P | 15 | 12.414 | -16.242 | -0.288 | 0.00 | 0.00 | PROA |
| 237 | ATOM | 237 | HG21 | ILE | P | 15 | 11.536 | -16.680 | -0.808 | 0.00 | 0.00 | PROA |
| 238 | ATOM | 238 | HG22 | ILE | P | 15 | 13.313 | -16.555 | -0.862 | 0.00 | 0.00 | PROA |
| 239 | ATOM | 239 | HG23 | ILE | P | 15 | 12.356 | -15.139 | -0.409 | 0.00 | 0.00 | PROA |
| 240 | ATOM | 240 | CG1  | ILE | P | 15 | 11.408 | -16.038 | 2.035  | 0.00 | 0.00 | PROA |
| 241 | ATOM | 241 | HG11 | ILE | P | 15 | 11.870 | -16.148 | 3.040  | 0.00 | 0.00 | PROA |
| 242 | ATOM | 242 | HG12 | ILE | P | 15 | 10.569 | -16.767 | 2.018  | 0.00 | 0.00 | PROA |
| 243 | ATOM | 243 | CD   | ILE | P | 15 | 10.863 | -14.659 | 1.691  | 0.00 | 0.00 | PROA |
| 244 | ATOM | 244 | HD1  | ILE | P | 15 | 10.110 | -14.292 | 2.420  | 0.00 | 0.00 | PROA |
| 245 | ATOM | 245 | HD2  | ILE | P | 15 | 10.338 | -14.704 | 0.713  | 0.00 | 0.00 | PROA |
| 246 | ATOM | 246 | HD3  | ILE | P | 15 | 11.695 | -13.925 | 1.636  | 0.00 | 0.00 | PROA |
| 247 | ATOM | 247 | C    | ILE | P | 15 | 13.614 | -18.773 | 0.396  | 0.00 | 0.00 | PROA |
| 248 | ATOM | 248 | O    | ILE | P | 15 | 13.189 | -19.087 | -0.669 | 0.00 | 0.00 | PROA |
| 249 | ATOM | 249 | N    | ALA | P | 16 | 14.915 | -18.992 | 0.719  | 0.00 | 0.00 | PROA |
| 250 | ATOM | 250 | HN   | ALA | P | 16 | 15.294 | -18.504 | 1.502  | 0.00 | 0.00 | PROA |
| 251 | ATOM | 251 | CA   | ALA | P | 16 | 15.827 | -19.713 | -0.145 | 0.00 | 0.00 | PROA |
| 252 | ATOM | 252 | HA   | ALA | P | 16 | 15.657 | -19.307 | -1.132 | 0.00 | 0.00 | PROA |
| 253 | ATOM | 253 | CB   | ALA | P | 16 | 17.307 | -19.519 | 0.226  | 0.00 | 0.00 | PROA |
| 254 | ATOM | 254 | HB1  | ALA | P | 16 | 17.512 | -18.436 | 0.089  | 0.00 | 0.00 | PROA |
| 255 | ATOM | 255 | HB2  | ALA | P | 16 | 17.995 | -20.031 | -0.481 | 0.00 | 0.00 | PROA |
| 256 | ATOM | 256 | HB3  | ALA | P | 16 | 17.494 | -19.925 | 1.243  | 0.00 | 0.00 | PROA |
| 257 | ATOM | 257 | C    | ALA | P | 16 | 15.512 | -21.186 | -0.213 | 0.00 | 0.00 | PROA |
| 258 | ATOM | 258 | O    | ALA | P | 16 | 15.573 | -21.752 | -1.364 | 0.00 | 0.00 | PROA |
| 259 | ATOM | 259 | N    | ASP | P | 17 | 15.061 | -21.934 | 0.848  | 0.00 | 0.00 | PROA |
| 260 | ATOM | 260 | HN   | ASP | P | 17 | 15.267 | -21.571 | 1.753  | 0.00 | 0.00 | PROA |
| 261 | ATOM | 261 | CA   | ASP | P | 17 | 14.435 | -23.309 | 0.724  | 0.00 | 0.00 | PROA |
| 262 | ATOM | 262 | HA   | ASP | P | 17 | 15.131 | -23.955 | 0.209  | 0.00 | 0.00 | PROA |
| 263 | ATOM | 263 | CB   | ASP | P | 17 | 14.144 | -24.003 | 2.015  | 0.00 | 0.00 | PROA |
| 264 | ATOM | 264 | HB1  | ASP | P | 17 | 13.631 | -24.965 | 1.801  | 0.00 | 0.00 | PROA |
| 265 | ATOM | 265 | HB2  | ASP | P | 17 | 13.560 | -23.332 | 2.681  | 0.00 | 0.00 | PROA |
| 266 | ATOM | 266 | CG   | ASP | P | 17 | 15.420 | -24.296 | 2.724  | 0.00 | 0.00 | PROA |
| 267 | ATOM | 267 | OD1  | ASP | P | 17 | 16.473 | -24.594 | 2.170  | 0.00 | 0.00 | PROA |
| 268 | ATOM | 268 | OD2  | ASP | P | 17 | 15.359 | -24.369 | 3.983  | 0.00 | 0.00 | PROA |
| 269 | ATOM | 269 | C    | ASP | P | 17 | 13.241 | -23.314 | -0.198 | 0.00 | 0.00 | PROA |
| 270 | ATOM | 270 | O    | ASP | P | 17 | 13.108 | -24.233 | -1.025 | 0.00 | 0.00 | PROA |
| 271 | ATOM | 271 | N    | VAL | P | 18 | 12.459 | -22.256 | -0.163 | 0.00 | 0.00 | PROA |
| 272 | ATOM | 272 | HN   | VAL | P | 18 | 12.753 | -21.404 | 0.264  | 0.00 | 0.00 | PROA |
| 273 | ATOM | 273 | CA   | VAL | P | 18 | 11.349 | -22.064 | -1.134 | 0.00 | 0.00 | PROA |
| 274 | ATOM | 274 | HA   | VAL | P | 18 | 10.835 | -23.005 | -1.255 | 0.00 | 0.00 | PROA |
| 275 | ATOM | 275 | CB   | VAL | P | 18 | 10.308 | -20.975 | -0.735 | 0.00 | 0.00 | PROA |
| 276 | ATOM | 276 | HB   | VAL | P | 18 | 10.727 | -19.987 | -0.448 | 0.00 | 0.00 | PROA |
| 277 | ATOM | 277 | CG1  | VAL | P | 18 | 9.218  | -20.729 | -1.803 | 0.00 | 0.00 | PROA |
| 278 | ATOM | 278 | HG11 | VAL | P | 18 | 9.620  | -20.151 | -2.662 | 0.00 | 0.00 | PROA |
| 279 | ATOM | 279 | HG12 | VAL | P | 18 | 8.440  | -20.110 | -1.307 | 0.00 | 0.00 | PROA |
| 280 | ATOM | 280 | HG13 | VAL | P | 18 | 8.839  | -21.703 | -2.181 | 0.00 | 0.00 | PROA |
| 281 | ATOM | 281 | CG2  | VAL | P | 18 | 9.613  | -21.553 | 0.494  | 0.00 | 0.00 | PROA |
| 282 | ATOM | 282 | HG21 | VAL | P | 18 | 9.008  | -20.714 | 0.898  | 0.00 | 0.00 | PROA |
| 283 | ATOM | 283 | HG22 | VAL | P | 18 | 10.412 | -21.722 | 1.248  | 0.00 | 0.00 | PROA |
| 284 | ATOM | 284 | HG23 | VAL | P | 18 | 8.970  | -22.455 | 0.401  | 0.00 | 0.00 | PROA |
| 285 | ATOM | 285 | C    | VAL | P | 18 | 11.663 | -21.751 | -2.567 | 0.00 | 0.00 | PROA |
| 286 | ATOM | 286 | O    | VAL | P | 18 | 11.042 | -22.323 | -3.451 | 0.00 | 0.00 | PROA |
| 287 | ATOM | 287 | N    | VAL | P | 19 | 12.725 | -20.886 | -2.781 | 0.00 | 0.00 | PROA |
| 288 | ATOM | 288 | HN   | VAL | P | 19 | 13.195 | -20.278 | -2.146 | 0.00 | 0.00 | PROA |
| 289 | ATOM | 289 | CA   | VAL | P | 19 | 13.299 | -20.716 | -4.116 | 0.00 | 0.00 | PROA |
| 290 | ATOM | 290 | HA   | VAL | P | 19 | 12.501 | -20.395 | -4.769 | 0.00 | 0.00 | PROA |
| 291 | ATOM | 291 | CB   | VAL | P | 19 | 14.198 | -19.436 | -4.074 | 0.00 | 0.00 | PROA |
| 292 | ATOM | 292 | HB   | VAL | P | 19 | 14.947 | -19.511 | -3.257 | 0.00 | 0.00 | PROA |

|     |      |     |      |     |   |    |        |         |         |      |      |      |
|-----|------|-----|------|-----|---|----|--------|---------|---------|------|------|------|
| 293 | ATOM | 293 | CG1  | VAL | P | 19 | 14.873 | -19.390 | -5.495  | 0.00 | 0.00 | PROA |
| 294 | ATOM | 294 | HG11 | VAL | P | 19 | 15.659 | -18.605 | -5.470  | 0.00 | 0.00 | PROA |
| 295 | ATOM | 295 | HG12 | VAL | P | 19 | 14.151 | -19.205 | -6.319  | 0.00 | 0.00 | PROA |
| 296 | ATOM | 296 | HG13 | VAL | P | 19 | 15.422 | -20.320 | -5.754  | 0.00 | 0.00 | PROA |
| 297 | ATOM | 297 | CG2  | VAL | P | 19 | 13.341 | -18.152 | -3.853  | 0.00 | 0.00 | PROA |
| 298 | ATOM | 298 | HG21 | VAL | P | 19 | 14.023 | -17.333 | -3.538  | 0.00 | 0.00 | PROA |
| 299 | ATOM | 299 | HG22 | VAL | P | 19 | 12.603 | -18.315 | -3.039  | 0.00 | 0.00 | PROA |
| 300 | ATOM | 300 | HG23 | VAL | P | 19 | 12.818 | -17.849 | -4.786  | 0.00 | 0.00 | PROA |
| 301 | ATOM | 301 | C    | VAL | P | 19 | 13.912 | -21.969 | -4.748  | 0.00 | 0.00 | PROA |
| 302 | ATOM | 302 | O    | VAL | P | 19 | 13.622 | -22.197 | -5.956  | 0.00 | 0.00 | PROA |
| 303 | ATOM | 303 | N    | GLU | P | 20 | 14.601 | -22.858 | -4.001  | 0.00 | 0.00 | PROA |
| 304 | ATOM | 304 | HN   | GLU | P | 20 | 14.873 | -22.561 | -3.090  | 0.00 | 0.00 | PROA |
| 305 | ATOM | 305 | CA   | GLU | P | 20 | 14.998 | -24.164 | -4.600  | 0.00 | 0.00 | PROA |
| 306 | ATOM | 306 | HA   | GLU | P | 20 | 15.268 | -23.975 | -5.629  | 0.00 | 0.00 | PROA |
| 307 | ATOM | 307 | CB   | GLU | P | 20 | 16.124 | -24.807 | -3.740  | 0.00 | 0.00 | PROA |
| 308 | ATOM | 308 | HB1  | GLU | P | 20 | 15.742 | -25.025 | -2.720  | 0.00 | 0.00 | PROA |
| 309 | ATOM | 309 | HB2  | GLU | P | 20 | 16.904 | -24.017 | -3.693  | 0.00 | 0.00 | PROA |
| 310 | ATOM | 310 | CG   | GLU | P | 20 | 16.705 | -26.006 | -4.500  | 0.00 | 0.00 | PROA |
| 311 | ATOM | 311 | HG1  | GLU | P | 20 | 16.684 | -25.781 | -5.588  | 0.00 | 0.00 | PROA |
| 312 | ATOM | 312 | HG2  | GLU | P | 20 | 16.071 | -26.903 | -4.331  | 0.00 | 0.00 | PROA |
| 313 | ATOM | 313 | CD   | GLU | P | 20 | 18.075 | -26.488 | -4.014  | 0.00 | 0.00 | PROA |
| 314 | ATOM | 314 | OE1  | GLU | P | 20 | 19.085 | -25.895 | -4.395  | 0.00 | 0.00 | PROA |
| 315 | ATOM | 315 | OE2  | GLU | P | 20 | 18.142 | -27.411 | -3.198  | 0.00 | 0.00 | PROA |
| 316 | ATOM | 316 | C    | GLU | P | 20 | 13.765 | -25.113 | -4.732  | 0.00 | 0.00 | PROA |
| 317 | ATOM | 317 | O    | GLU | P | 20 | 13.649 | -25.866 | -5.697  | 0.00 | 0.00 | PROA |
| 318 | ATOM | 318 | N    | LYS | P | 21 | 12.717 | -25.060 | -3.919  | 0.00 | 0.00 | PROA |
| 319 | ATOM | 319 | HN   | LYS | P | 21 | 12.753 | -24.363 | -3.207  | 0.00 | 0.00 | PROA |
| 320 | ATOM | 320 | CA   | LYS | P | 21 | 11.621 | -25.854 | -4.084  | 0.00 | 0.00 | PROA |
| 321 | ATOM | 321 | HA   | LYS | P | 21 | 11.963 | -26.867 | -4.234  | 0.00 | 0.00 | PROA |
| 322 | ATOM | 322 | CB   | LYS | P | 21 | 10.687 | -25.714 | -2.896  | 0.00 | 0.00 | PROA |
| 323 | ATOM | 323 | HB1  | LYS | P | 21 | 10.383 | -24.650 | -2.802  | 0.00 | 0.00 | PROA |
| 324 | ATOM | 324 | HB2  | LYS | P | 21 | 11.171 | -25.899 | -1.912  | 0.00 | 0.00 | PROA |
| 325 | ATOM | 325 | CG   | LYS | P | 21 | 9.415  | -26.629 | -2.910  | 0.00 | 0.00 | PROA |
| 326 | ATOM | 326 | HG1  | LYS | P | 21 | 8.933  | -26.670 | -3.910  | 0.00 | 0.00 | PROA |
| 327 | ATOM | 327 | HG2  | LYS | P | 21 | 8.709  | -26.235 | -2.149  | 0.00 | 0.00 | PROA |
| 328 | ATOM | 328 | CD   | LYS | P | 21 | 9.656  | -28.036 | -2.340  | 0.00 | 0.00 | PROA |
| 329 | ATOM | 329 | HD1  | LYS | P | 21 | 10.016 | -27.995 | -1.289  | 0.00 | 0.00 | PROA |
| 330 | ATOM | 330 | HD2  | LYS | P | 21 | 10.462 | -28.393 | -3.016  | 0.00 | 0.00 | PROA |
| 331 | ATOM | 331 | CE   | LYS | P | 21 | 8.393  | -28.987 | -2.389  | 0.00 | 0.00 | PROA |
| 332 | ATOM | 332 | HE1  | LYS | P | 21 | 7.850  | -28.775 | -3.335  | 0.00 | 0.00 | PROA |
| 333 | ATOM | 333 | HE2  | LYS | P | 21 | 7.817  | -28.863 | -1.447  | 0.00 | 0.00 | PROA |
| 334 | ATOM | 334 | NZ   | LYS | P | 21 | 8.879  | -30.324 | -2.549  | 0.00 | 0.00 | PROA |
| 335 | ATOM | 335 | HZ1  | LYS | P | 21 | 9.685  | -30.340 | -3.205  | 0.00 | 0.00 | PROA |
| 336 | ATOM | 336 | HZ2  | LYS | P | 21 | 8.134  | -30.978 | -2.864  | 0.00 | 0.00 | PROA |
| 337 | ATOM | 337 | HZ3  | LYS | P | 21 | 9.190  | -30.716 | -1.637  | 0.00 | 0.00 | PROA |
| 338 | ATOM | 338 | C    | LYS | P | 21 | 10.877 | -25.604 | -5.408  | 0.00 | 0.00 | PROA |
| 339 | ATOM | 339 | O    | LYS | P | 21 | 10.454 | -26.564 | -6.050  | 0.00 | 0.00 | PROA |
| 340 | ATOM | 340 | N    | ILE | P | 22 | 10.880 | -24.318 | -5.962  | 0.00 | 0.00 | PROA |
| 341 | ATOM | 341 | HN   | ILE | P | 22 | 11.300 | -23.509 | -5.558  | 0.00 | 0.00 | PROA |
| 342 | ATOM | 342 | CA   | ILE | P | 22 | 9.936  | -23.979 | -7.054  | 0.00 | 0.00 | PROA |
| 343 | ATOM | 343 | HA   | ILE | P | 22 | 9.091  | -24.640 | -7.175  | 0.00 | 0.00 | PROA |
| 344 | ATOM | 344 | CB   | ILE | P | 22 | 9.175  | -22.623 | -6.685  | 0.00 | 0.00 | PROA |
| 345 | ATOM | 345 | HB   | ILE | P | 22 | 9.068  | -22.628 | -5.579  | 0.00 | 0.00 | PROA |
| 346 | ATOM | 346 | CG2  | ILE | P | 22 | 10.062 | -21.446 | -6.991  | 0.00 | 0.00 | PROA |
| 347 | ATOM | 347 | HG21 | ILE | P | 22 | 10.218 | -21.238 | -8.071  | 0.00 | 0.00 | PROA |
| 348 | ATOM | 348 | HG22 | ILE | P | 22 | 11.022 | -21.537 | -6.440  | 0.00 | 0.00 | PROA |
| 349 | ATOM | 349 | HG23 | ILE | P | 22 | 9.573  | -20.509 | -6.647  | 0.00 | 0.00 | PROA |
| 350 | ATOM | 350 | CG1  | ILE | P | 22 | 7.757  | -22.448 | -7.313  | 0.00 | 0.00 | PROA |
| 351 | ATOM | 351 | HG11 | ILE | P | 22 | 7.696  | -22.713 | -8.390  | 0.00 | 0.00 | PROA |
| 352 | ATOM | 352 | HG12 | ILE | P | 22 | 7.481  | -21.379 | -7.190  | 0.00 | 0.00 | PROA |
| 353 | ATOM | 353 | CD   | ILE | P | 22 | 6.667  | -23.269 | -6.498  | 0.00 | 0.00 | PROA |
| 354 | ATOM | 354 | HD1  | ILE | P | 22 | 5.797  | -23.386 | -7.178  | 0.00 | 0.00 | PROA |
| 355 | ATOM | 355 | HD2  | ILE | P | 22 | 6.384  | -22.788 | -5.537  | 0.00 | 0.00 | PROA |
| 356 | ATOM | 356 | HD3  | ILE | P | 22 | 7.091  | -24.282 | -6.329  | 0.00 | 0.00 | PROA |
| 357 | ATOM | 357 | C    | ILE | P | 22 | 10.752 | -23.874 | -8.300  | 0.00 | 0.00 | PROA |
| 358 | ATOM | 358 | O    | ILE | P | 22 | 10.198 | -23.750 | -9.438  | 0.00 | 0.00 | PROA |
| 359 | ATOM | 359 | N    | ALA | P | 23 | 12.084 | -23.920 | -8.252  | 0.00 | 0.00 | PROA |
| 360 | ATOM | 360 | HN   | ALA | P | 23 | 12.621 | -23.936 | -7.412  | 0.00 | 0.00 | PROA |
| 361 | ATOM | 361 | CA   | ALA | P | 23 | 12.905 | -23.938 | -9.466  | 0.00 | 0.00 | PROA |
| 362 | ATOM | 362 | HA   | ALA | P | 23 | 12.535 | -23.227 | -10.190 | 0.00 | 0.00 | PROA |
| 363 | ATOM | 363 | CB   | ALA | P | 23 | 14.188 | -23.390 | -8.925  | 0.00 | 0.00 | PROA |
| 364 | ATOM | 364 | HB1  | ALA | P | 23 | 13.996 | -22.452 | -8.361  | 0.00 | 0.00 | PROA |
| 365 | ATOM | 365 | HB2  | ALA | P | 23 | 14.940 | -23.225 | -9.726  | 0.00 | 0.00 | PROA |

|     |      |     |      |     |   |    |        |         |         |      |      |      |
|-----|------|-----|------|-----|---|----|--------|---------|---------|------|------|------|
| 366 | ATOM | 366 | HB3  | ALA | P | 23 | 14.658 | -24.024 | -8.142  | 0.00 | 0.00 | PROA |
| 367 | ATOM | 367 | C    | ALA | P | 23 | 12.948 | -25.367 | -10.064 | 0.00 | 0.00 | PROA |
| 368 | ATOM | 368 | O    | ALA | P | 23 | 12.903 | -26.357 | -9.247  | 0.00 | 0.00 | PROA |
| 369 | ATOM | 369 | N    | PRO | P | 24 | 13.131 | -25.544 | -11.370 | 0.00 | 0.00 | PROA |
| 370 | ATOM | 370 | CD   | PRO | P | 24 | 13.436 | -26.838 | -12.002 | 0.00 | 0.00 | PROA |
| 371 | ATOM | 371 | HD1  | PRO | P | 24 | 12.406 | -27.219 | -12.167 | 0.00 | 0.00 | PROA |
| 372 | ATOM | 372 | HD2  | PRO | P | 24 | 14.098 | -27.422 | -11.326 | 0.00 | 0.00 | PROA |
| 373 | ATOM | 373 | CA   | PRO | P | 24 | 13.059 | -24.553 | -12.408 | 0.00 | 0.00 | PROA |
| 374 | ATOM | 374 | HA   | PRO | P | 24 | 13.300 | -23.550 | -12.088 | 0.00 | 0.00 | PROA |
| 375 | ATOM | 375 | CB   | PRO | P | 24 | 14.099 | -25.010 | -13.415 | 0.00 | 0.00 | PROA |
| 376 | ATOM | 376 | HB1  | PRO | P | 24 | 15.077 | -24.711 | -12.982 | 0.00 | 0.00 | PROA |
| 377 | ATOM | 377 | HB2  | PRO | P | 24 | 13.929 | -24.717 | -14.473 | 0.00 | 0.00 | PROA |
| 378 | ATOM | 378 | CG   | PRO | P | 24 | 14.163 | -26.589 | -13.294 | 0.00 | 0.00 | PROA |
| 379 | ATOM | 379 | HG1  | PRO | P | 24 | 13.591 | -26.967 | -14.169 | 0.00 | 0.00 | PROA |
| 380 | ATOM | 380 | HG2  | PRO | P | 24 | 15.219 | -26.935 | -13.282 | 0.00 | 0.00 | PROA |
| 381 | ATOM | 381 | C    | PRO | P | 24 | 11.694 | -24.545 | -13.058 | 0.00 | 0.00 | PROA |
| 382 | ATOM | 382 | O    | PRO | P | 24 | 11.542 | -24.322 | -14.268 | 0.00 | 0.00 | PROA |
| 383 | ATOM | 383 | N    | ALA | P | 25 | 10.588 | -24.736 | -12.340 | 0.00 | 0.00 | PROA |
| 384 | ATOM | 384 | HN   | ALA | P | 25 | 10.540 | -24.692 | -11.345 | 0.00 | 0.00 | PROA |
| 385 | ATOM | 385 | CA   | ALA | P | 25 | 9.235  | -24.723 | -12.893 | 0.00 | 0.00 | PROA |
| 386 | ATOM | 386 | HA   | ALA | P | 25 | 9.180  | -25.126 | -13.894 | 0.00 | 0.00 | PROA |
| 387 | ATOM | 387 | CB   | ALA | P | 25 | 8.438  | -25.623 | -12.041 | 0.00 | 0.00 | PROA |
| 388 | ATOM | 388 | HB1  | ALA | P | 25 | 7.412  | -25.737 | -12.453 | 0.00 | 0.00 | PROA |
| 389 | ATOM | 389 | HB2  | ALA | P | 25 | 8.480  | -25.487 | -10.939 | 0.00 | 0.00 | PROA |
| 390 | ATOM | 390 | HB3  | ALA | P | 25 | 8.855  | -26.648 | -12.139 | 0.00 | 0.00 | PROA |
| 391 | ATOM | 391 | C    | ALA | P | 25 | 8.538  | -23.392 | -13.108 | 0.00 | 0.00 | PROA |
| 392 | ATOM | 392 | O    | ALA | P | 25 | 7.349  | -23.291 | -13.471 | 0.00 | 0.00 | PROA |
| 393 | ATOM | 393 | N    | VAL | P | 26 | 9.298  | -22.256 | -12.902 | 0.00 | 0.00 | PROA |
| 394 | ATOM | 394 | HN   | VAL | P | 26 | 10.285 | -22.380 | -12.831 | 0.00 | 0.00 | PROA |
| 395 | ATOM | 395 | CA   | VAL | P | 26 | 8.749  | -20.889 | -12.953 | 0.00 | 0.00 | PROA |
| 396 | ATOM | 396 | HA   | VAL | P | 26 | 7.689  | -20.816 | -13.147 | 0.00 | 0.00 | PROA |
| 397 | ATOM | 397 | CB   | VAL | P | 26 | 8.933  | -20.188 | -11.688 | 0.00 | 0.00 | PROA |
| 398 | ATOM | 398 | HB   | VAL | P | 26 | 10.036 | -20.252 | -11.567 | 0.00 | 0.00 | PROA |
| 399 | ATOM | 399 | CG1  | VAL | P | 26 | 8.407  | -18.734 | -11.715 | 0.00 | 0.00 | PROA |
| 400 | ATOM | 400 | HG11 | VAL | P | 26 | 9.187  | -18.207 | -12.304 | 0.00 | 0.00 | PROA |
| 401 | ATOM | 401 | HG12 | VAL | P | 26 | 8.361  | -18.424 | -10.649 | 0.00 | 0.00 | PROA |
| 402 | ATOM | 402 | HG13 | VAL | P | 26 | 7.421  | -18.622 | -12.213 | 0.00 | 0.00 | PROA |
| 403 | ATOM | 403 | CG2  | VAL | P | 26 | 8.223  | -21.009 | -10.607 | 0.00 | 0.00 | PROA |
| 404 | ATOM | 404 | HG21 | VAL | P | 26 | 8.635  | -22.034 | -10.495 | 0.00 | 0.00 | PROA |
| 405 | ATOM | 405 | HG22 | VAL | P | 26 | 7.133  | -21.139 | -10.779 | 0.00 | 0.00 | PROA |
| 406 | ATOM | 406 | HG23 | VAL | P | 26 | 8.170  | -20.473 | -9.636  | 0.00 | 0.00 | PROA |
| 407 | ATOM | 407 | C    | VAL | P | 26 | 9.412  | -20.106 | -14.125 | 0.00 | 0.00 | PROA |
| 408 | ATOM | 408 | O    | VAL | P | 26 | 10.617 | -19.703 | -13.985 | 0.00 | 0.00 | PROA |
| 409 | ATOM | 409 | N    | VAL | P | 27 | 8.697  | -20.012 | -15.264 | 0.00 | 0.00 | PROA |
| 410 | ATOM | 410 | HN   | VAL | P | 27 | 7.704  | -19.919 | -15.246 | 0.00 | 0.00 | PROA |
| 411 | ATOM | 411 | CA   | VAL | P | 27 | 9.269  | -19.856 | -16.573 | 0.00 | 0.00 | PROA |
| 412 | ATOM | 412 | HA   | VAL | P | 27 | 10.343 | -19.895 | -16.469 | 0.00 | 0.00 | PROA |
| 413 | ATOM | 413 | CB   | VAL | P | 27 | 8.921  | -21.055 | -17.491 | 0.00 | 0.00 | PROA |
| 414 | ATOM | 414 | HB   | VAL | P | 27 | 9.374  | -20.919 | -18.496 | 0.00 | 0.00 | PROA |
| 415 | ATOM | 415 | CG1  | VAL | P | 27 | 9.335  | -22.304 | -16.799 | 0.00 | 0.00 | PROA |
| 416 | ATOM | 416 | HG11 | VAL | P | 27 | 9.286  | -23.227 | -17.415 | 0.00 | 0.00 | PROA |
| 417 | ATOM | 417 | HG12 | VAL | P | 27 | 9.034  | -22.521 | -15.751 | 0.00 | 0.00 | PROA |
| 418 | ATOM | 418 | HG13 | VAL | P | 27 | 10.426 | -22.286 | -16.590 | 0.00 | 0.00 | PROA |
| 419 | ATOM | 419 | CG2  | VAL | P | 27 | 7.406  | -21.190 | -17.801 | 0.00 | 0.00 | PROA |
| 420 | ATOM | 420 | HG21 | VAL | P | 27 | 6.846  | -21.267 | -16.844 | 0.00 | 0.00 | PROA |
| 421 | ATOM | 421 | HG22 | VAL | P | 27 | 7.227  | -22.080 | -18.441 | 0.00 | 0.00 | PROA |
| 422 | ATOM | 422 | HG23 | VAL | P | 27 | 7.092  | -20.209 | -18.219 | 0.00 | 0.00 | PROA |
| 423 | ATOM | 423 | C    | VAL | P | 27 | 8.834  | -18.590 | -17.267 | 0.00 | 0.00 | PROA |
| 424 | ATOM | 424 | O    | VAL | P | 27 | 7.870  | -17.868 | -16.906 | 0.00 | 0.00 | PROA |
| 425 | ATOM | 425 | N    | HSD | P | 28 | 9.586  | -18.142 | -18.267 | 0.00 | 0.00 | PROA |
| 426 | ATOM | 426 | HN   | HSD | P | 28 | 10.288 | -18.666 | -18.742 | 0.00 | 0.00 | PROA |
| 427 | ATOM | 427 | CA   | HSD | P | 28 | 9.308  | -16.827 | -18.905 | 0.00 | 0.00 | PROA |
| 428 | ATOM | 428 | HA   | HSD | P | 28 | 8.546  | -16.355 | -18.304 | 0.00 | 0.00 | PROA |
| 429 | ATOM | 429 | CB   | HSD | P | 28 | 10.567 | -15.926 | -18.995 | 0.00 | 0.00 | PROA |
| 430 | ATOM | 430 | HB1  | HSD | P | 28 | 11.279 | -16.448 | -19.669 | 0.00 | 0.00 | PROA |
| 431 | ATOM | 431 | HB2  | HSD | P | 28 | 11.068 | -15.924 | -18.003 | 0.00 | 0.00 | PROA |
| 432 | ATOM | 432 | ND1  | HSD | P | 28 | 10.593 | -13.908 | -20.499 | 0.00 | 0.00 | PROA |
| 433 | ATOM | 433 | HD1  | HSD | P | 28 | 10.721 | -14.447 | -21.332 | 0.00 | 0.00 | PROA |
| 434 | ATOM | 434 | CG   | HSD | P | 28 | 10.347 | -14.479 | -19.301 | 0.00 | 0.00 | PROA |
| 435 | ATOM | 435 | CE1  | HSD | P | 28 | 10.450 | -12.568 | -20.319 | 0.00 | 0.00 | PROA |
| 436 | ATOM | 436 | HE1  | HSD | P | 28 | 10.366 | -11.897 | -21.174 | 0.00 | 0.00 | PROA |
| 437 | ATOM | 437 | NE2  | HSD | P | 28 | 10.245 | -12.232 | -19.022 | 0.00 | 0.00 | PROA |
| 438 | ATOM | 438 | CD2  | HSD | P | 28 | 10.082 | -13.470 | -18.426 | 0.00 | 0.00 | PROA |

|     |      |     |      |     |   |    |        |         |         |      |      |      |
|-----|------|-----|------|-----|---|----|--------|---------|---------|------|------|------|
| 439 | ATOM | 439 | HD2  | HSD | P | 28 | 10.178 | -13.486 | -17.347 | 0.00 | 0.00 | PROA |
| 440 | ATOM | 440 | C    | HSD | P | 28 | 8.739  | -17.039 | -20.249 | 0.00 | 0.00 | PROA |
| 441 | ATOM | 441 | O    | HSD | P | 28 | 8.700  | -18.128 | -20.828 | 0.00 | 0.00 | PROA |
| 442 | ATOM | 442 | N    | ILE | P | 29 | 8.031  | -16.000 | -20.751 | 0.00 | 0.00 | PROA |
| 443 | ATOM | 443 | HN   | ILE | P | 29 | 8.122  | -15.128 | -20.277 | 0.00 | 0.00 | PROA |
| 444 | ATOM | 444 | CA   | ILE | P | 29 | 7.182  | -16.093 | -21.953 | 0.00 | 0.00 | PROA |
| 445 | ATOM | 445 | HA   | ILE | P | 29 | 7.430  | -17.000 | -22.483 | 0.00 | 0.00 | PROA |
| 446 | ATOM | 446 | CB   | ILE | P | 29 | 5.668  | -16.118 | -21.590 | 0.00 | 0.00 | PROA |
| 447 | ATOM | 447 | HB   | ILE | P | 29 | 5.469  | -15.338 | -20.825 | 0.00 | 0.00 | PROA |
| 448 | ATOM | 448 | CG2  | ILE | P | 29 | 4.842  | -16.196 | -22.898 | 0.00 | 0.00 | PROA |
| 449 | ATOM | 449 | HG21 | ILE | P | 29 | 5.076  | -15.307 | -23.521 | 0.00 | 0.00 | PROA |
| 450 | ATOM | 450 | HG22 | ILE | P | 29 | 3.778  | -16.153 | -22.581 | 0.00 | 0.00 | PROA |
| 451 | ATOM | 451 | HG23 | ILE | P | 29 | 5.101  | -17.160 | -23.386 | 0.00 | 0.00 | PROA |
| 452 | ATOM | 452 | CG1  | ILE | P | 29 | 5.394  | -17.421 | -20.821 | 0.00 | 0.00 | PROA |
| 453 | ATOM | 453 | HG11 | ILE | P | 29 | 6.046  | -17.399 | -19.922 | 0.00 | 0.00 | PROA |
| 454 | ATOM | 454 | HG12 | ILE | P | 29 | 5.819  | -18.230 | -21.452 | 0.00 | 0.00 | PROA |
| 455 | ATOM | 455 | CD   | ILE | P | 29 | 3.877  | -17.666 | -20.505 | 0.00 | 0.00 | PROA |
| 456 | ATOM | 456 | HD1  | ILE | P | 29 | 3.508  | -18.189 | -21.413 | 0.00 | 0.00 | PROA |
| 457 | ATOM | 457 | HD2  | ILE | P | 29 | 3.231  | -16.781 | -20.323 | 0.00 | 0.00 | PROA |
| 458 | ATOM | 458 | HD3  | ILE | P | 29 | 3.778  | -18.344 | -19.630 | 0.00 | 0.00 | PROA |
| 459 | ATOM | 459 | C    | ILE | P | 29 | 7.564  | -14.892 | -22.866 | 0.00 | 0.00 | PROA |
| 460 | ATOM | 460 | O    | ILE | P | 29 | 7.686  | -13.757 | -22.408 | 0.00 | 0.00 | PROA |
| 461 | ATOM | 461 | N    | GLU | P | 30 | 7.528  | -15.104 | -24.177 | 0.00 | 0.00 | PROA |
| 462 | ATOM | 462 | HN   | GLU | P | 30 | 7.276  | -15.996 | -24.546 | 0.00 | 0.00 | PROA |
| 463 | ATOM | 463 | CA   | GLU | P | 30 | 7.900  | -13.969 | -25.014 | 0.00 | 0.00 | PROA |
| 464 | ATOM | 464 | HA   | GLU | P | 30 | 7.701  | -13.054 | -24.475 | 0.00 | 0.00 | PROA |
| 465 | ATOM | 465 | CB   | GLU | P | 30 | 9.397  | -14.004 | -25.486 | 0.00 | 0.00 | PROA |
| 466 | ATOM | 466 | HB1  | GLU | P | 30 | 9.562  | -15.022 | -25.900 | 0.00 | 0.00 | PROA |
| 467 | ATOM | 467 | HB2  | GLU | P | 30 | 9.946  | -13.926 | -24.523 | 0.00 | 0.00 | PROA |
| 468 | ATOM | 468 | CG   | GLU | P | 30 | 9.713  | -12.907 | -26.433 | 0.00 | 0.00 | PROA |
| 469 | ATOM | 469 | HG1  | GLU | P | 30 | 9.185  | -11.944 | -26.261 | 0.00 | 0.00 | PROA |
| 470 | ATOM | 470 | HG2  | GLU | P | 30 | 9.352  | -13.256 | -27.424 | 0.00 | 0.00 | PROA |
| 471 | ATOM | 471 | CD   | GLU | P | 30 | 11.175 | -12.534 | -26.511 | 0.00 | 0.00 | PROA |
| 472 | ATOM | 472 | OE1  | GLU | P | 30 | 11.403 | -11.422 | -25.964 | 0.00 | 0.00 | PROA |
| 473 | ATOM | 473 | OE2  | GLU | P | 30 | 12.010 | -13.187 | -27.127 | 0.00 | 0.00 | PROA |
| 474 | ATOM | 474 | C    | GLU | P | 30 | 7.011  | -13.995 | -26.246 | 0.00 | 0.00 | PROA |
| 475 | ATOM | 475 | O    | GLU | P | 30 | 6.874  | -15.000 | -26.978 | 0.00 | 0.00 | PROA |
| 476 | ATOM | 476 | N    | LEU | P | 31 | 6.400  | -12.809 | -26.480 | 0.00 | 0.00 | PROA |
| 477 | ATOM | 477 | HN   | LEU | P | 31 | 6.604  | -11.958 | -26.003 | 0.00 | 0.00 | PROA |
| 478 | ATOM | 478 | CA   | LEU | P | 31 | 5.499  | -12.661 | -27.592 | 0.00 | 0.00 | PROA |
| 479 | ATOM | 479 | HA   | LEU | P | 31 | 5.133  | -13.600 | -27.978 | 0.00 | 0.00 | PROA |
| 480 | ATOM | 480 | CB   | LEU | P | 31 | 4.158  | -12.092 | -27.081 | 0.00 | 0.00 | PROA |
| 481 | ATOM | 481 | HB1  | LEU | P | 31 | 3.632  | -11.885 | -28.038 | 0.00 | 0.00 | PROA |
| 482 | ATOM | 482 | HB2  | LEU | P | 31 | 4.378  | -11.109 | -26.613 | 0.00 | 0.00 | PROA |
| 483 | ATOM | 483 | CG   | LEU | P | 31 | 3.329  | -13.053 | -26.204 | 0.00 | 0.00 | PROA |
| 484 | ATOM | 484 | HG   | LEU | P | 31 | 3.555  | -14.020 | -26.704 | 0.00 | 0.00 | PROA |
| 485 | ATOM | 485 | CD1  | LEU | P | 31 | 3.876  | -12.999 | -24.725 | 0.00 | 0.00 | PROA |
| 486 | ATOM | 486 | HD11 | LEU | P | 31 | 3.808  | -11.975 | -24.301 | 0.00 | 0.00 | PROA |
| 487 | ATOM | 487 | HD12 | LEU | P | 31 | 4.925  | -13.359 | -24.657 | 0.00 | 0.00 | PROA |
| 488 | ATOM | 488 | HD13 | LEU | P | 31 | 3.321  | -13.754 | -24.127 | 0.00 | 0.00 | PROA |
| 489 | ATOM | 489 | CD2  | LEU | P | 31 | 1.825  | -12.784 | -26.327 | 0.00 | 0.00 | PROA |
| 490 | ATOM | 490 | HD21 | LEU | P | 31 | 1.220  | -13.570 | -25.826 | 0.00 | 0.00 | PROA |
| 491 | ATOM | 491 | HD22 | LEU | P | 31 | 1.451  | -12.653 | -27.364 | 0.00 | 0.00 | PROA |
| 492 | ATOM | 492 | HD23 | LEU | P | 31 | 1.561  | -11.833 | -25.818 | 0.00 | 0.00 | PROA |
| 493 | ATOM | 493 | C    | LEU | P | 31 | 6.177  | -11.795 | -28.671 | 0.00 | 0.00 | PROA |
| 494 | ATOM | 494 | O    | LEU | P | 31 | 6.705  | -10.690 | -28.442 | 0.00 | 0.00 | PROA |
| 495 | ATOM | 495 | N    | PHE | P | 32 | 5.989  | -12.209 | -29.902 | 0.00 | 0.00 | PROA |
| 496 | ATOM | 496 | HN   | PHE | P | 32 | 5.369  | -12.963 | -30.104 | 0.00 | 0.00 | PROA |
| 497 | ATOM | 497 | CA   | PHE | P | 32 | 7.034  | -11.848 | -30.937 | 0.00 | 0.00 | PROA |
| 498 | ATOM | 498 | HA   | PHE | P | 32 | 7.369  | -10.825 | -30.850 | 0.00 | 0.00 | PROA |
| 499 | ATOM | 499 | CB   | PHE | P | 32 | 8.325  | -12.710 | -30.909 | 0.00 | 0.00 | PROA |
| 500 | ATOM | 500 | HB1  | PHE | P | 32 | 8.704  | -12.762 | -29.866 | 0.00 | 0.00 | PROA |
| 501 | ATOM | 501 | HB2  | PHE | P | 32 | 9.189  | -12.283 | -31.461 | 0.00 | 0.00 | PROA |
| 502 | ATOM | 502 | CG   | PHE | P | 32 | 8.129  | -14.086 | -31.381 | 0.00 | 0.00 | PROA |
| 503 | ATOM | 503 | CD1  | PHE | P | 32 | 8.653  | -14.518 | -32.644 | 0.00 | 0.00 | PROA |
| 504 | ATOM | 504 | HD1  | PHE | P | 32 | 8.946  | -13.811 | -33.406 | 0.00 | 0.00 | PROA |
| 505 | ATOM | 505 | CE1  | PHE | P | 32 | 8.665  | -15.851 | -33.009 | 0.00 | 0.00 | PROA |
| 506 | ATOM | 506 | HE1  | PHE | P | 32 | 8.933  | -16.131 | -34.017 | 0.00 | 0.00 | PROA |
| 507 | ATOM | 507 | CZ   | PHE | P | 32 | 8.119  | -16.824 | -32.158 | 0.00 | 0.00 | PROA |
| 508 | ATOM | 508 | HZ   | PHE | P | 32 | 8.094  | -17.869 | -32.429 | 0.00 | 0.00 | PROA |
| 509 | ATOM | 509 | CD2  | PHE | P | 32 | 7.617  | -15.113 | -30.527 | 0.00 | 0.00 | PROA |
| 510 | ATOM | 510 | HD2  | PHE | P | 32 | 7.257  | -14.781 | -29.565 | 0.00 | 0.00 | PROA |
| 511 | ATOM | 511 | CE2  | PHE | P | 32 | 7.612  | -16.445 | -30.915 | 0.00 | 0.00 | PROA |

|     |      |     |      |     |   |    |        |         |         |      |      |      |
|-----|------|-----|------|-----|---|----|--------|---------|---------|------|------|------|
| 512 | ATOM | 512 | HE2  | PHE | P | 32 | 6.988  | -17.064 | -30.288 | 0.00 | 0.00 | PROA |
| 513 | ATOM | 513 | C    | PHE | P | 32 | 6.316  | -11.773 | -32.269 | 0.00 | 0.00 | PROA |
| 514 | ATOM | 514 | O    | PHE | P | 32 | 5.319  | -12.560 | -32.484 | 0.00 | 0.00 | PROA |
| 515 | ATOM | 515 | N    | ARG | P | 33 | 6.677  | -10.885 | -33.107 | 0.00 | 0.00 | PROA |
| 516 | ATOM | 516 | HN   | ARG | P | 33 | 7.492  | -10.368 | -32.855 | 0.00 | 0.00 | PROA |
| 517 | ATOM | 517 | CA   | ARG | P | 33 | 6.345  | -10.753 | -34.497 | 0.00 | 0.00 | PROA |
| 518 | ATOM | 518 | HA   | ARG | P | 33 | 5.590  | -11.487 | -34.739 | 0.00 | 0.00 | PROA |
| 519 | ATOM | 519 | CB   | ARG | P | 33 | 5.771  | -9.321  | -34.755 | 0.00 | 0.00 | PROA |
| 520 | ATOM | 520 | HB1  | ARG | P | 33 | 5.182  | -9.048  | -33.854 | 0.00 | 0.00 | PROA |
| 521 | ATOM | 521 | HB2  | ARG | P | 33 | 5.122  | -9.376  | -35.655 | 0.00 | 0.00 | PROA |
| 522 | ATOM | 522 | CG   | ARG | P | 33 | 6.759  | -8.140  | -35.095 | 0.00 | 0.00 | PROA |
| 523 | ATOM | 523 | HG1  | ARG | P | 33 | 7.300  | -8.356  | -36.041 | 0.00 | 0.00 | PROA |
| 524 | ATOM | 524 | HG2  | ARG | P | 33 | 7.336  | -7.971  | -34.161 | 0.00 | 0.00 | PROA |
| 525 | ATOM | 525 | CD   | ARG | P | 33 | 6.036  | -6.873  | -35.263 | 0.00 | 0.00 | PROA |
| 526 | ATOM | 526 | HD1  | ARG | P | 33 | 5.713  | -6.483  | -34.274 | 0.00 | 0.00 | PROA |
| 527 | ATOM | 527 | HD2  | ARG | P | 33 | 5.233  | -6.904  | -36.031 | 0.00 | 0.00 | PROA |
| 528 | ATOM | 528 | NE   | ARG | P | 33 | 7.112  | -5.904  | -35.767 | 0.00 | 0.00 | PROA |
| 529 | ATOM | 529 | HE   | ARG | P | 33 | 7.559  | -5.354  | -35.061 | 0.00 | 0.00 | PROA |
| 530 | ATOM | 530 | CZ   | ARG | P | 33 | 7.146  | -5.320  | -36.949 | 0.00 | 0.00 | PROA |
| 531 | ATOM | 531 | NH1  | ARG | P | 33 | 6.652  | -5.852  | -38.068 | 0.00 | 0.00 | PROA |
| 532 | ATOM | 532 | HH11 | ARG | P | 33 | 6.221  | -6.753  | -38.022 | 0.00 | 0.00 | PROA |
| 533 | ATOM | 533 | HH12 | ARG | P | 33 | 6.616  | -5.288  | -38.893 | 0.00 | 0.00 | PROA |
| 534 | ATOM | 534 | NH2  | ARG | P | 33 | 7.868  | -4.203  | -37.089 | 0.00 | 0.00 | PROA |
| 535 | ATOM | 535 | HH21 | ARG | P | 33 | 8.600  | -3.996  | -36.441 | 0.00 | 0.00 | PROA |
| 536 | ATOM | 536 | HH22 | ARG | P | 33 | 7.945  | -3.787  | -37.995 | 0.00 | 0.00 | PROA |
| 537 | ATOM | 537 | C    | ARG | P | 33 | 7.518  | -11.094 | -35.352 | 0.00 | 0.00 | PROA |
| 538 | ATOM | 538 | O    | ARG | P | 33 | 8.660  | -10.983 | -34.880 | 0.00 | 0.00 | PROA |
| 539 | ATOM | 539 | N    | LYS | P | 34 | 7.397  | -11.580 | -36.566 | 0.00 | 0.00 | PROA |
| 540 | ATOM | 540 | HN   | LYS | P | 34 | 6.459  | -11.693 | -36.886 | 0.00 | 0.00 | PROA |
| 541 | ATOM | 541 | CA   | LYS | P | 34 | 8.456  | -11.701 | -37.452 | 0.00 | 0.00 | PROA |
| 542 | ATOM | 542 | HA   | LYS | P | 34 | 9.397  | -11.790 | -36.929 | 0.00 | 0.00 | PROA |
| 543 | ATOM | 543 | CB   | LYS | P | 34 | 8.313  | -12.976 | -38.338 | 0.00 | 0.00 | PROA |
| 544 | ATOM | 544 | HB1  | LYS | P | 34 | 9.010  | -12.940 | -39.202 | 0.00 | 0.00 | PROA |
| 545 | ATOM | 545 | HB2  | LYS | P | 34 | 7.290  | -13.028 | -38.768 | 0.00 | 0.00 | PROA |
| 546 | ATOM | 546 | CG   | LYS | P | 34 | 8.420  | -14.303 | -37.577 | 0.00 | 0.00 | PROA |
| 547 | ATOM | 547 | HG1  | LYS | P | 34 | 7.770  | -15.068 | -38.052 | 0.00 | 0.00 | PROA |
| 548 | ATOM | 548 | HG2  | LYS | P | 34 | 7.982  | -14.175 | -36.564 | 0.00 | 0.00 | PROA |
| 549 | ATOM | 549 | CD   | LYS | P | 34 | 9.851  | -14.872 | -37.457 | 0.00 | 0.00 | PROA |
| 550 | ATOM | 550 | HD1  | LYS | P | 34 | 9.914  | -15.897 | -37.032 | 0.00 | 0.00 | PROA |
| 551 | ATOM | 551 | HD2  | LYS | P | 34 | 10.504 | -14.159 | -36.910 | 0.00 | 0.00 | PROA |
| 552 | ATOM | 552 | CE   | LYS | P | 34 | 10.589 | -15.118 | -38.898 | 0.00 | 0.00 | PROA |
| 553 | ATOM | 553 | HE1  | LYS | P | 34 | 11.549 | -15.604 | -38.622 | 0.00 | 0.00 | PROA |
| 554 | ATOM | 554 | HE2  | LYS | P | 34 | 10.758 | -14.154 | -39.425 | 0.00 | 0.00 | PROA |
| 555 | ATOM | 555 | NZ   | LYS | P | 34 | 9.882  | -16.117 | -39.717 | 0.00 | 0.00 | PROA |
| 556 | ATOM | 556 | HZ1  | LYS | P | 34 | 9.776  | -17.073 | -39.321 | 0.00 | 0.00 | PROA |
| 557 | ATOM | 557 | HZ2  | LYS | P | 34 | 10.276 | -16.147 | -40.679 | 0.00 | 0.00 | PROA |
| 558 | ATOM | 558 | HZ3  | LYS | P | 34 | 8.892  | -15.826 | -39.850 | 0.00 | 0.00 | PROA |
| 559 | ATOM | 559 | C    | LYS | P | 34 | 8.521  | -10.435 | -38.216 | 0.00 | 0.00 | PROA |
| 560 | ATOM | 560 | O    | LYS | P | 34 | 7.520  | -9.881  | -38.729 | 0.00 | 0.00 | PROA |
| 561 | ATOM | 561 | N    | LEU | P | 35 | 9.722  | -9.888  | -38.369 | 0.00 | 0.00 | PROA |
| 562 | ATOM | 562 | HN   | LEU | P | 35 | 10.524 | -10.255 | -37.904 | 0.00 | 0.00 | PROA |
| 563 | ATOM | 563 | CA   | LEU | P | 35 | 9.933  | -8.758  | -39.228 | 0.00 | 0.00 | PROA |
| 564 | ATOM | 564 | HA   | LEU | P | 35 | 9.327  | -7.945  | -38.858 | 0.00 | 0.00 | PROA |
| 565 | ATOM | 565 | CB   | LEU | P | 35 | 11.430 | -8.346  | -39.183 | 0.00 | 0.00 | PROA |
| 566 | ATOM | 566 | HB1  | LEU | P | 35 | 12.018 | -9.278  | -39.322 | 0.00 | 0.00 | PROA |
| 567 | ATOM | 567 | HB2  | LEU | P | 35 | 11.772 | -7.873  | -38.237 | 0.00 | 0.00 | PROA |
| 568 | ATOM | 568 | CG   | LEU | P | 35 | 11.802 | -7.224  | -40.139 | 0.00 | 0.00 | PROA |
| 569 | ATOM | 569 | HG   | LEU | P | 35 | 11.425 | -7.468  | -41.155 | 0.00 | 0.00 | PROA |
| 570 | ATOM | 570 | CD1  | LEU | P | 35 | 11.263 | -5.793  | -39.721 | 0.00 | 0.00 | PROA |
| 571 | ATOM | 571 | HD11 | LEU | P | 35 | 10.154 | -5.832  | -39.680 | 0.00 | 0.00 | PROA |
| 572 | ATOM | 572 | HD12 | LEU | P | 35 | 11.517 | -4.967  | -40.419 | 0.00 | 0.00 | PROA |
| 573 | ATOM | 573 | HD13 | LEU | P | 35 | 11.638 | -5.638  | -38.687 | 0.00 | 0.00 | PROA |
| 574 | ATOM | 574 | CD2  | LEU | P | 35 | 13.320 | -7.002  | -40.264 | 0.00 | 0.00 | PROA |
| 575 | ATOM | 575 | HD21 | LEU | P | 35 | 13.871 | -7.902  | -40.611 | 0.00 | 0.00 | PROA |
| 576 | ATOM | 576 | HD22 | LEU | P | 35 | 13.673 | -6.757  | -39.239 | 0.00 | 0.00 | PROA |
| 577 | ATOM | 577 | HD23 | LEU | P | 35 | 13.468 | -6.177  | -40.993 | 0.00 | 0.00 | PROA |
| 578 | ATOM | 578 | C    | LEU | P | 35 | 9.575  | -9.078  | -40.722 | 0.00 | 0.00 | PROA |
| 579 | ATOM | 579 | O    | LEU | P | 35 | 10.007 | -10.184 | -41.139 | 0.00 | 0.00 | PROA |
| 580 | ATOM | 580 | N    | PRO | P | 36 | 8.806  | -8.425  | -41.575 | 0.00 | 0.00 | PROA |
| 581 | ATOM | 581 | CD   | PRO | P | 36 | 7.801  | -7.443  | -41.062 | 0.00 | 0.00 | PROA |
| 582 | ATOM | 582 | HD1  | PRO | P | 36 | 8.262  | -6.438  | -40.959 | 0.00 | 0.00 | PROA |
| 583 | ATOM | 583 | HD2  | PRO | P | 36 | 7.329  | -7.694  | -40.088 | 0.00 | 0.00 | PROA |
| 584 | ATOM | 584 | CA   | PRO | P | 36 | 8.622  | -8.728  | -42.956 | 0.00 | 0.00 | PROA |



|     |      |     |     |     |   |    |        |         |         |      |      |      |
|-----|------|-----|-----|-----|---|----|--------|---------|---------|------|------|------|
| 585 | ATOM | 585 | HA  | PRO | P | 36 | 8.165  | -9.668  | -43.227 | 0.00 | 0.00 | PROA |
| 586 | ATOM | 586 | CB  | PRO | P | 36 | 7.698  | -7.576  | -43.375 | 0.00 | 0.00 | PROA |
| 587 | ATOM | 587 | HB1 | PRO | P | 36 | 7.321  | -7.823  | -44.390 | 0.00 | 0.00 | PROA |
| 588 | ATOM | 588 | HB2 | PRO | P | 36 | 8.233  | -6.630  | -43.605 | 0.00 | 0.00 | PROA |
| 589 | ATOM | 589 | CG  | PRO | P | 36 | 6.810  | -7.340  | -42.167 | 0.00 | 0.00 | PROA |
| 590 | ATOM | 590 | HG1 | PRO | P | 36 | 6.332  | -6.338  | -42.141 | 0.00 | 0.00 | PROA |
| 591 | ATOM | 591 | HG2 | PRO | P | 36 | 6.099  | -8.193  | -42.200 | 0.00 | 0.00 | PROA |
| 592 | ATOM | 592 | C   | PRO | P | 36 | 9.893  | -8.847  | -43.792 | 0.00 | 0.00 | PROA |
| 593 | ATOM | 593 | O   | PRO | P | 36 | 10.800 | -8.020  | -43.626 | 0.00 | 0.00 | PROA |
| 594 | ATOM | 594 | N   | PHE | P | 37 | 10.009 | -9.877  | -44.629 | 0.00 | 0.00 | PROA |
| 595 | ATOM | 595 | HN  | PHE | P | 37 | 9.236  | -10.481 | -44.810 | 0.00 | 0.00 | PROA |
| 596 | ATOM | 596 | CA  | PHE | P | 37 | 11.054 | -10.035 | -45.641 | 0.00 | 0.00 | PROA |
| 597 | ATOM | 597 | HA  | PHE | P | 37 | 10.732 | -10.829 | -46.298 | 0.00 | 0.00 | PROA |
| 598 | ATOM | 598 | CB  | PHE | P | 37 | 11.427 | -8.699  | -46.400 | 0.00 | 0.00 | PROA |
| 599 | ATOM | 599 | HB1 | PHE | P | 37 | 11.978 | -8.082  | -45.659 | 0.00 | 0.00 | PROA |
| 600 | ATOM | 600 | HB2 | PHE | P | 37 | 10.549 | -8.068  | -46.656 | 0.00 | 0.00 | PROA |
| 601 | ATOM | 601 | CG  | PHE | P | 37 | 12.140 | -8.791  | -47.717 | 0.00 | 0.00 | PROA |
| 602 | ATOM | 602 | CD1 | PHE | P | 37 | 11.720 | -9.706  | -48.639 | 0.00 | 0.00 | PROA |
| 603 | ATOM | 603 | HD1 | PHE | P | 37 | 11.102 | -10.584 | -48.529 | 0.00 | 0.00 | PROA |
| 604 | ATOM | 604 | CE1 | PHE | P | 37 | 12.318 | -9.645  | -49.965 | 0.00 | 0.00 | PROA |
| 605 | ATOM | 605 | HE1 | PHE | P | 37 | 12.033 | -10.444 | -50.634 | 0.00 | 0.00 | PROA |
| 606 | ATOM | 606 | CZ  | PHE | P | 37 | 13.248 | -8.659  | -50.335 | 0.00 | 0.00 | PROA |
| 607 | ATOM | 607 | HZ  | PHE | P | 37 | 13.638 | -8.704  | -51.341 | 0.00 | 0.00 | PROA |
| 608 | ATOM | 608 | CD2 | PHE | P | 37 | 13.095 | -7.823  | -48.044 | 0.00 | 0.00 | PROA |
| 609 | ATOM | 609 | HD2 | PHE | P | 37 | 13.302 | -7.132  | -47.240 | 0.00 | 0.00 | PROA |
| 610 | ATOM | 610 | CE2 | PHE | P | 37 | 13.566 | -7.727  | -49.366 | 0.00 | 0.00 | PROA |
| 611 | ATOM | 611 | HE2 | PHE | P | 37 | 14.229 | -6.888  | -49.517 | 0.00 | 0.00 | PROA |
| 612 | ATOM | 612 | C   | PHE | P | 37 | 12.267 | -10.581 | -45.116 | 0.00 | 0.00 | PROA |
| 613 | ATOM | 613 | O   | PHE | P | 37 | 13.278 | -10.772 | -45.795 | 0.00 | 0.00 | PROA |
| 614 | ATOM | 614 | N   | SER | P | 38 | 12.338 | -10.826 | -43.783 | 0.00 | 0.00 | PROA |
| 615 | ATOM | 615 | HN  | SER | P | 38 | 11.489 | -10.680 | -43.280 | 0.00 | 0.00 | PROA |
| 616 | ATOM | 616 | CA  | SER | P | 38 | 13.505 | -11.320 | -43.083 | 0.00 | 0.00 | PROA |
| 617 | ATOM | 617 | HA  | SER | P | 38 | 14.360 | -11.471 | -43.725 | 0.00 | 0.00 | PROA |
| 618 | ATOM | 618 | CB  | SER | P | 38 | 13.888 | -10.304 | -42.013 | 0.00 | 0.00 | PROA |
| 619 | ATOM | 619 | HB1 | SER | P | 38 | 13.126 | -10.111 | -41.229 | 0.00 | 0.00 | PROA |
| 620 | ATOM | 620 | HB2 | SER | P | 38 | 14.014 | -9.296  | -42.462 | 0.00 | 0.00 | PROA |
| 621 | ATOM | 621 | OG  | SER | P | 38 | 15.190 | -10.559 | -41.372 | 0.00 | 0.00 | PROA |
| 622 | ATOM | 622 | HG1 | SER | P | 38 | 15.770 | -10.122 | -42.000 | 0.00 | 0.00 | PROA |
| 623 | ATOM | 623 | C   | SER | P | 38 | 13.191 | -12.625 | -42.358 | 0.00 | 0.00 | PROA |
| 624 | ATOM | 624 | O   | SER | P | 38 | 12.017 | -12.990 | -42.396 | 0.00 | 0.00 | PROA |
| 625 | ATOM | 625 | N   | LYS | P | 39 | 14.217 | -13.276 | -41.772 | 0.00 | 0.00 | PROA |
| 626 | ATOM | 626 | HN  | LYS | P | 39 | 15.177 | -13.020 | -41.853 | 0.00 | 0.00 | PROA |
| 627 | ATOM | 627 | CA  | LYS | P | 39 | 13.932 | -14.286 | -40.798 | 0.00 | 0.00 | PROA |
| 628 | ATOM | 628 | HA  | LYS | P | 39 | 12.977 | -14.751 | -40.995 | 0.00 | 0.00 | PROA |
| 629 | ATOM | 629 | CB  | LYS | P | 39 | 15.012 | -15.410 | -40.975 | 0.00 | 0.00 | PROA |
| 630 | ATOM | 630 | HB1 | LYS | P | 39 | 14.704 | -16.292 | -40.374 | 0.00 | 0.00 | PROA |
| 631 | ATOM | 631 | HB2 | LYS | P | 39 | 15.949 | -15.045 | -40.503 | 0.00 | 0.00 | PROA |
| 632 | ATOM | 632 | CG  | LYS | P | 39 | 15.260 | -15.912 | -42.421 | 0.00 | 0.00 | PROA |
| 633 | ATOM | 633 | HG1 | LYS | P | 39 | 16.127 | -16.606 | -42.421 | 0.00 | 0.00 | PROA |
| 634 | ATOM | 634 | HG2 | LYS | P | 39 | 15.518 | -15.063 | -43.090 | 0.00 | 0.00 | PROA |
| 635 | ATOM | 635 | CD  | LYS | P | 39 | 13.954 | -16.573 | -42.981 | 0.00 | 0.00 | PROA |
| 636 | ATOM | 636 | HD1 | LYS | P | 39 | 13.215 | -15.745 | -42.927 | 0.00 | 0.00 | PROA |
| 637 | ATOM | 637 | HD2 | LYS | P | 39 | 13.516 | -17.338 | -42.305 | 0.00 | 0.00 | PROA |
| 638 | ATOM | 638 | CE  | LYS | P | 39 | 14.084 | -17.227 | -44.320 | 0.00 | 0.00 | PROA |
| 639 | ATOM | 639 | HE1 | LYS | P | 39 | 14.264 | -16.451 | -45.095 | 0.00 | 0.00 | PROA |
| 640 | ATOM | 640 | HE2 | LYS | P | 39 | 13.186 | -17.741 | -44.723 | 0.00 | 0.00 | PROA |
| 641 | ATOM | 641 | NZ  | LYS | P | 39 | 15.143 | -18.235 | -44.362 | 0.00 | 0.00 | PROA |
| 642 | ATOM | 642 | HZ1 | LYS | P | 39 | 15.305 | -18.703 | -45.276 | 0.00 | 0.00 | PROA |
| 643 | ATOM | 643 | HZ2 | LYS | P | 39 | 14.976 | -18.953 | -43.629 | 0.00 | 0.00 | PROA |
| 644 | ATOM | 644 | HZ3 | LYS | P | 39 | 16.068 | -17.799 | -44.170 | 0.00 | 0.00 | PROA |
| 645 | ATOM | 645 | C   | LYS | P | 39 | 14.015 | -13.680 | -39.381 | 0.00 | 0.00 | PROA |
| 646 | ATOM | 646 | O   | LYS | P | 39 | 13.892 | -14.446 | -38.478 | 0.00 | 0.00 | PROA |
| 647 | ATOM | 647 | N   | ARG | P | 40 | 14.365 | -12.424 | -39.110 | 0.00 | 0.00 | PROA |
| 648 | ATOM | 648 | HN  | ARG | P | 40 | 14.801 | -11.861 | -39.809 | 0.00 | 0.00 | PROA |
| 649 | ATOM | 649 | CA  | ARG | P | 40 | 14.369 | -11.942 | -37.746 | 0.00 | 0.00 | PROA |
| 650 | ATOM | 650 | HA  | ARG | P | 40 | 14.968 | -12.561 | -37.095 | 0.00 | 0.00 | PROA |
| 651 | ATOM | 651 | CB  | ARG | P | 40 | 14.877 | -10.488 | -37.596 | 0.00 | 0.00 | PROA |
| 652 | ATOM | 652 | HB1 | ARG | P | 40 | 14.900 | -10.060 | -36.571 | 0.00 | 0.00 | PROA |
| 653 | ATOM | 653 | HB2 | ARG | P | 40 | 14.197 | -9.828  | -38.176 | 0.00 | 0.00 | PROA |
| 654 | ATOM | 654 | CG  | ARG | P | 40 | 16.267 | -10.412 | -38.124 | 0.00 | 0.00 | PROA |
| 655 | ATOM | 655 | HG1 | ARG | P | 40 | 16.530 | -9.352  | -38.328 | 0.00 | 0.00 | PROA |
| 656 | ATOM | 656 | HG2 | ARG | P | 40 | 16.390 | -10.943 | -39.091 | 0.00 | 0.00 | PROA |
| 657 | ATOM | 657 | CD  | ARG | P | 40 | 17.366 | -10.788 | -37.065 | 0.00 | 0.00 | PROA |

|     |      |     |      |     |   |    |        |         |         |      |      |      |
|-----|------|-----|------|-----|---|----|--------|---------|---------|------|------|------|
| 658 | ATOM | 658 | HD1  | ARG | P | 40 | 17.492 | -11.874 | -36.867 | 0.00 | 0.00 | PROA |
| 659 | ATOM | 659 | HD2  | ARG | P | 40 | 17.158 | -10.336 | -36.071 | 0.00 | 0.00 | PROA |
| 660 | ATOM | 660 | NE   | ARG | P | 40 | 18.756 | -10.345 | -37.535 | 0.00 | 0.00 | PROA |
| 661 | ATOM | 661 | HE   | ARG | P | 40 | 18.914 | -10.071 | -38.484 | 0.00 | 0.00 | PROA |
| 662 | ATOM | 662 | CZ   | ARG | P | 40 | 19.831 | -10.198 | -36.726 | 0.00 | 0.00 | PROA |
| 663 | ATOM | 663 | NH1  | ARG | P | 40 | 19.895 | -10.742 | -35.550 | 0.00 | 0.00 | PROA |
| 664 | ATOM | 664 | HH11 | ARG | P | 40 | 19.022 | -11.094 | -35.212 | 0.00 | 0.00 | PROA |
| 665 | ATOM | 665 | HH12 | ARG | P | 40 | 20.607 | -10.419 | -34.927 | 0.00 | 0.00 | PROA |
| 666 | ATOM | 666 | NH2  | ARG | P | 40 | 20.935 | -9.775  | -37.263 | 0.00 | 0.00 | PROA |
| 667 | ATOM | 667 | HH21 | ARG | P | 40 | 20.858 | -9.518  | -38.226 | 0.00 | 0.00 | PROA |
| 668 | ATOM | 668 | HH22 | ARG | P | 40 | 21.865 | -10.081 | -37.057 | 0.00 | 0.00 | PROA |
| 669 | ATOM | 669 | C    | ARG | P | 40 | 13.065 | -11.953 | -36.990 | 0.00 | 0.00 | PROA |
| 670 | ATOM | 670 | O    | ARG | P | 40 | 11.934 | -11.736 | -37.444 | 0.00 | 0.00 | PROA |
| 671 | ATOM | 671 | N    | GLU | P | 41 | 13.157 | -12.277 | -35.649 | 0.00 | 0.00 | PROA |
| 672 | ATOM | 672 | HN   | GLU | P | 41 | 14.013 | -12.602 | -35.256 | 0.00 | 0.00 | PROA |
| 673 | ATOM | 673 | CA   | GLU | P | 41 | 12.014 | -12.344 | -34.710 | 0.00 | 0.00 | PROA |
| 674 | ATOM | 674 | HA   | GLU | P | 41 | 11.119 | -12.333 | -35.315 | 0.00 | 0.00 | PROA |
| 675 | ATOM | 675 | CB   | GLU | P | 41 | 12.151 | -13.572 | -33.782 | 0.00 | 0.00 | PROA |
| 676 | ATOM | 676 | HB1  | GLU | P | 41 | 11.567 | -13.574 | -32.837 | 0.00 | 0.00 | PROA |
| 677 | ATOM | 677 | HB2  | GLU | P | 41 | 13.210 | -13.528 | -33.449 | 0.00 | 0.00 | PROA |
| 678 | ATOM | 678 | CG   | GLU | P | 41 | 11.847 | -14.919 | -34.539 | 0.00 | 0.00 | PROA |
| 679 | ATOM | 679 | HG1  | GLU | P | 41 | 12.423 | -15.024 | -35.483 | 0.00 | 0.00 | PROA |
| 680 | ATOM | 680 | HG2  | GLU | P | 41 | 10.760 | -15.065 | -34.713 | 0.00 | 0.00 | PROA |
| 681 | ATOM | 681 | CD   | GLU | P | 41 | 12.308 | -16.097 | -33.667 | 0.00 | 0.00 | PROA |
| 682 | ATOM | 682 | OE1  | GLU | P | 41 | 12.006 | -17.245 | -33.975 | 0.00 | 0.00 | PROA |
| 683 | ATOM | 683 | OE2  | GLU | P | 41 | 13.011 | -15.838 | -32.640 | 0.00 | 0.00 | PROA |
| 684 | ATOM | 684 | C    | GLU | P | 41 | 12.047 | -11.172 | -33.835 | 0.00 | 0.00 | PROA |
| 685 | ATOM | 685 | O    | GLU | P | 41 | 13.063 | -10.886 | -33.157 | 0.00 | 0.00 | PROA |
| 686 | ATOM | 686 | N    | VAL | P | 42 | 11.072 | -10.316 | -33.840 | 0.00 | 0.00 | PROA |
| 687 | ATOM | 687 | HN   | VAL | P | 42 | 10.180 | -10.506 | -34.243 | 0.00 | 0.00 | PROA |
| 688 | ATOM | 688 | CA   | VAL | P | 42 | 11.079 | -9.052  | -33.128 | 0.00 | 0.00 | PROA |
| 689 | ATOM | 689 | HA   | VAL | P | 42 | 12.099 | -8.888  | -32.812 | 0.00 | 0.00 | PROA |
| 690 | ATOM | 690 | CB   | VAL | P | 42 | 10.900 | -7.945  | -34.111 | 0.00 | 0.00 | PROA |
| 691 | ATOM | 691 | HB   | VAL | P | 42 | 10.088 | -8.195  | -34.827 | 0.00 | 0.00 | PROA |
| 692 | ATOM | 692 | CG1  | VAL | P | 42 | 10.597 | -6.636  | -33.394 | 0.00 | 0.00 | PROA |
| 693 | ATOM | 693 | HG11 | VAL | P | 42 | 11.372 | -6.243  | -32.702 | 0.00 | 0.00 | PROA |
| 694 | ATOM | 694 | HG12 | VAL | P | 42 | 9.572  | -6.667  | -32.966 | 0.00 | 0.00 | PROA |
| 695 | ATOM | 695 | HG13 | VAL | P | 42 | 10.445 | -5.881  | -34.194 | 0.00 | 0.00 | PROA |
| 696 | ATOM | 696 | CG2  | VAL | P | 42 | 12.246 | -7.887  | -35.014 | 0.00 | 0.00 | PROA |
| 697 | ATOM | 697 | HG21 | VAL | P | 42 | 12.636 | -8.857  | -35.390 | 0.00 | 0.00 | PROA |
| 698 | ATOM | 698 | HG22 | VAL | P | 42 | 13.060 | -7.587  | -34.320 | 0.00 | 0.00 | PROA |
| 699 | ATOM | 699 | HG23 | VAL | P | 42 | 11.955 | -7.212  | -35.847 | 0.00 | 0.00 | PROA |
| 700 | ATOM | 700 | C    | VAL | P | 42 | 10.027 | -9.079  | -32.017 | 0.00 | 0.00 | PROA |
| 701 | ATOM | 701 | O    | VAL | P | 42 | 8.842  | -9.289  | -32.346 | 0.00 | 0.00 | PROA |
| 702 | ATOM | 702 | N    | PRO | P | 43 | 10.377 | -8.897  | -30.661 | 0.00 | 0.00 | PROA |
| 703 | ATOM | 703 | CD   | PRO | P | 43 | 11.769 | -9.108  | -30.217 | 0.00 | 0.00 | PROA |
| 704 | ATOM | 704 | HD1  | PRO | P | 43 | 12.428 | -8.246  | -30.457 | 0.00 | 0.00 | PROA |
| 705 | ATOM | 705 | HD2  | PRO | P | 43 | 12.291 | -9.981  | -30.664 | 0.00 | 0.00 | PROA |
| 706 | ATOM | 706 | CA   | PRO | P | 43 | 9.460  | -8.765  | -29.548 | 0.00 | 0.00 | PROA |
| 707 | ATOM | 707 | HA   | PRO | P | 43 | 8.846  | -9.637  | -29.382 | 0.00 | 0.00 | PROA |
| 708 | ATOM | 708 | CB   | PRO | P | 43 | 10.362 | -8.451  | -28.316 | 0.00 | 0.00 | PROA |
| 709 | ATOM | 709 | HB1  | PRO | P | 43 | 9.942  | -8.937  | -27.410 | 0.00 | 0.00 | PROA |
| 710 | ATOM | 710 | HB2  | PRO | P | 43 | 10.588 | -7.390  | -28.074 | 0.00 | 0.00 | PROA |
| 711 | ATOM | 711 | CG   | PRO | P | 43 | 11.612 | -9.192  | -28.655 | 0.00 | 0.00 | PROA |
| 712 | ATOM | 712 | HG1  | PRO | P | 43 | 12.395 | -8.688  | -28.050 | 0.00 | 0.00 | PROA |
| 713 | ATOM | 713 | HG2  | PRO | P | 43 | 11.495 | -10.264 | -28.388 | 0.00 | 0.00 | PROA |
| 714 | ATOM | 714 | C    | PRO | P | 43 | 8.416  | -7.651  | -29.587 | 0.00 | 0.00 | PROA |
| 715 | ATOM | 715 | O    | PRO | P | 43 | 8.682  | -6.520  | -30.032 | 0.00 | 0.00 | PROA |
| 716 | ATOM | 716 | N    | VAL | P | 44 | 7.213  | -7.981  | -29.149 | 0.00 | 0.00 | PROA |
| 717 | ATOM | 717 | HN   | VAL | P | 44 | 7.009  | -8.898  | -28.817 | 0.00 | 0.00 | PROA |
| 718 | ATOM | 718 | CA   | VAL | P | 44 | 6.098  | -7.048  | -29.012 | 0.00 | 0.00 | PROA |
| 719 | ATOM | 719 | HA   | VAL | P | 44 | 6.534  | -6.063  | -28.927 | 0.00 | 0.00 | PROA |
| 720 | ATOM | 720 | CB   | VAL | P | 44 | 5.124  | -7.122  | -30.182 | 0.00 | 0.00 | PROA |
| 721 | ATOM | 721 | HB   | VAL | P | 44 | 4.108  | -6.776  | -29.896 | 0.00 | 0.00 | PROA |
| 722 | ATOM | 722 | CG1  | VAL | P | 44 | 5.641  | -6.221  | -31.386 | 0.00 | 0.00 | PROA |
| 723 | ATOM | 723 | HG11 | VAL | P | 44 | 5.960  | -5.211  | -31.051 | 0.00 | 0.00 | PROA |
| 724 | ATOM | 724 | HG12 | VAL | P | 44 | 4.796  | -6.059  | -32.089 | 0.00 | 0.00 | PROA |
| 725 | ATOM | 725 | HG13 | VAL | P | 44 | 6.493  | -6.577  | -32.002 | 0.00 | 0.00 | PROA |
| 726 | ATOM | 726 | CG2  | VAL | P | 44 | 4.718  | -8.556  | -30.595 | 0.00 | 0.00 | PROA |
| 727 | ATOM | 727 | HG21 | VAL | P | 44 | 4.211  | -9.099  | -29.768 | 0.00 | 0.00 | PROA |
| 728 | ATOM | 728 | HG22 | VAL | P | 44 | 5.644  | -9.101  | -30.880 | 0.00 | 0.00 | PROA |
| 729 | ATOM | 729 | HG23 | VAL | P | 44 | 4.113  | -8.647  | -31.522 | 0.00 | 0.00 | PROA |
| 730 | ATOM | 730 | C    | VAL | P | 44 | 5.429  | -7.244  | -27.621 | 0.00 | 0.00 | PROA |

|     |      |     |     |     |   |    |        |         |         |      |      |      |
|-----|------|-----|-----|-----|---|----|--------|---------|---------|------|------|------|
| 731 | ATOM | 731 | O   | VAL | P | 44 | 4.822  | -6.359  | -27.108 | 0.00 | 0.00 | PROA |
| 732 | ATOM | 732 | N   | ALA | P | 45 | 5.735  | -8.338  | -26.919 | 0.00 | 0.00 | PROA |
| 733 | ATOM | 733 | HN  | ALA | P | 45 | 6.274  | -9.087  | -27.295 | 0.00 | 0.00 | PROA |
| 734 | ATOM | 734 | CA  | ALA | P | 45 | 5.377  | -8.420  | -25.513 | 0.00 | 0.00 | PROA |
| 735 | ATOM | 735 | HA  | ALA | P | 45 | 5.589  | -7.585  | -24.861 | 0.00 | 0.00 | PROA |
| 736 | ATOM | 736 | CB  | ALA | P | 45 | 3.898  | -8.797  | -25.351 | 0.00 | 0.00 | PROA |
| 737 | ATOM | 737 | HB1 | ALA | P | 45 | 3.658  | -8.474  | -24.316 | 0.00 | 0.00 | PROA |
| 738 | ATOM | 738 | HB2 | ALA | P | 45 | 3.612  | -9.865  | -25.235 | 0.00 | 0.00 | PROA |
| 739 | ATOM | 739 | HB3 | ALA | P | 45 | 3.298  | -8.232  | -26.095 | 0.00 | 0.00 | PROA |
| 740 | ATOM | 740 | C   | ALA | P | 45 | 6.188  | -9.546  | -24.855 | 0.00 | 0.00 | PROA |
| 741 | ATOM | 741 | O   | ALA | P | 45 | 6.933  | -10.338 | -25.439 | 0.00 | 0.00 | PROA |
| 742 | ATOM | 742 | N   | SER | P | 46 | 6.082  | -9.601  | -23.562 | 0.00 | 0.00 | PROA |
| 743 | ATOM | 743 | HN  | SER | P | 46 | 5.691  | -8.795  | -23.123 | 0.00 | 0.00 | PROA |
| 744 | ATOM | 744 | CA  | SER | P | 46 | 6.604  | -10.733 | -22.680 | 0.00 | 0.00 | PROA |
| 745 | ATOM | 745 | HA  | SER | P | 46 | 6.318  | -11.706 | -23.052 | 0.00 | 0.00 | PROA |
| 746 | ATOM | 746 | CB  | SER | P | 46 | 8.113  | -10.734 | -22.522 | 0.00 | 0.00 | PROA |
| 747 | ATOM | 747 | HB1 | SER | P | 46 | 8.644  | -10.937 | -23.477 | 0.00 | 0.00 | PROA |
| 748 | ATOM | 748 | HB2 | SER | P | 46 | 8.359  | -11.530 | -21.787 | 0.00 | 0.00 | PROA |
| 749 | ATOM | 749 | OG  | SER | P | 46 | 8.662  | -9.505  | -21.964 | 0.00 | 0.00 | PROA |
| 750 | ATOM | 750 | HG1 | SER | P | 46 | 8.205  | -8.844  | -22.489 | 0.00 | 0.00 | PROA |
| 751 | ATOM | 751 | C   | SER | P | 46 | 5.892  | -10.636 | -21.327 | 0.00 | 0.00 | PROA |
| 752 | ATOM | 752 | O   | SER | P | 46 | 5.410  | -9.557  | -20.990 | 0.00 | 0.00 | PROA |
| 753 | ATOM | 753 | N   | GLY | P | 47 | 5.919  | -11.801 | -20.591 | 0.00 | 0.00 | PROA |
| 754 | ATOM | 754 | HN  | GLY | P | 47 | 6.252  | -12.658 | -20.977 | 0.00 | 0.00 | PROA |
| 755 | ATOM | 755 | CA  | GLY | P | 47 | 5.460  | -11.949 | -19.274 | 0.00 | 0.00 | PROA |
| 756 | ATOM | 756 | HA1 | GLY | P | 47 | 4.382  | -11.918 | -19.205 | 0.00 | 0.00 | PROA |
| 757 | ATOM | 757 | HA2 | GLY | P | 47 | 5.874  | -11.118 | -18.722 | 0.00 | 0.00 | PROA |
| 758 | ATOM | 758 | C   | GLY | P | 47 | 6.015  | -13.308 | -18.776 | 0.00 | 0.00 | PROA |
| 759 | ATOM | 759 | O   | GLY | P | 47 | 7.000  | -13.745 | -19.273 | 0.00 | 0.00 | PROA |
| 760 | ATOM | 760 | N   | SER | P | 48 | 5.434  | -13.954 | -17.726 | 0.00 | 0.00 | PROA |
| 761 | ATOM | 761 | HN  | SER | P | 48 | 4.603  | -13.667 | -17.257 | 0.00 | 0.00 | PROA |
| 762 | ATOM | 762 | CA  | SER | P | 48 | 5.976  | -15.170 | -17.145 | 0.00 | 0.00 | PROA |
| 763 | ATOM | 763 | HA  | SER | P | 48 | 6.587  | -15.699 | -17.861 | 0.00 | 0.00 | PROA |
| 764 | ATOM | 764 | CB  | SER | P | 48 | 6.865  | -14.915 | -15.842 | 0.00 | 0.00 | PROA |
| 765 | ATOM | 765 | HB1 | SER | P | 48 | 7.261  | -15.876 | -15.450 | 0.00 | 0.00 | PROA |
| 766 | ATOM | 766 | HB2 | SER | P | 48 | 6.164  | -14.456 | -15.113 | 0.00 | 0.00 | PROA |
| 767 | ATOM | 767 | OG  | SER | P | 48 | 8.079  | -14.234 | -16.098 | 0.00 | 0.00 | PROA |
| 768 | ATOM | 768 | HG1 | SER | P | 48 | 7.852  | -13.317 | -16.266 | 0.00 | 0.00 | PROA |
| 769 | ATOM | 769 | C   | SER | P | 48 | 4.793  | -16.130 | -16.822 | 0.00 | 0.00 | PROA |
| 770 | ATOM | 770 | O   | SER | P | 48 | 3.591  | -15.789 | -16.877 | 0.00 | 0.00 | PROA |
| 771 | ATOM | 771 | N   | GLY | P | 49 | 5.104  | -17.344 | -16.378 | 0.00 | 0.00 | PROA |
| 772 | ATOM | 772 | HN  | GLY | P | 49 | 5.999  | -17.784 | -16.376 | 0.00 | 0.00 | PROA |
| 773 | ATOM | 773 | CA  | GLY | P | 49 | 4.051  | -18.214 | -15.901 | 0.00 | 0.00 | PROA |
| 774 | ATOM | 774 | HA1 | GLY | P | 49 | 3.515  | -18.715 | -16.694 | 0.00 | 0.00 | PROA |
| 775 | ATOM | 775 | HA2 | GLY | P | 49 | 3.441  | -17.531 | -15.330 | 0.00 | 0.00 | PROA |
| 776 | ATOM | 776 | C   | GLY | P | 49 | 4.656  | -19.273 | -15.128 | 0.00 | 0.00 | PROA |
| 777 | ATOM | 777 | O   | GLY | P | 49 | 5.768  | -19.278 | -14.610 | 0.00 | 0.00 | PROA |
| 778 | ATOM | 778 | N   | PHE | P | 50 | 3.890  | -20.375 | -14.950 | 0.00 | 0.00 | PROA |
| 779 | ATOM | 779 | HN  | PHE | P | 50 | 2.939  | -20.339 | -15.246 | 0.00 | 0.00 | PROA |
| 780 | ATOM | 780 | CA  | PHE | P | 50 | 4.382  | -21.598 | -14.386 | 0.00 | 0.00 | PROA |
| 781 | ATOM | 781 | HA  | PHE | P | 50 | 5.431  | -21.570 | -14.640 | 0.00 | 0.00 | PROA |
| 782 | ATOM | 782 | CB  | PHE | P | 50 | 4.260  | -21.562 | -12.837 | 0.00 | 0.00 | PROA |
| 783 | ATOM | 783 | HB1 | PHE | P | 50 | 4.772  | -20.751 | -12.276 | 0.00 | 0.00 | PROA |
| 784 | ATOM | 784 | HB2 | PHE | P | 50 | 4.774  | -22.498 | -12.532 | 0.00 | 0.00 | PROA |
| 785 | ATOM | 785 | CG  | PHE | P | 50 | 2.845  | -21.491 | -12.325 | 0.00 | 0.00 | PROA |
| 786 | ATOM | 786 | CD1 | PHE | P | 50 | 2.178  | -20.342 | -12.004 | 0.00 | 0.00 | PROA |
| 787 | ATOM | 787 | HD1 | PHE | P | 50 | 2.665  | -19.398 | -12.199 | 0.00 | 0.00 | PROA |
| 788 | ATOM | 788 | CE1 | PHE | P | 50 | 0.937  | -20.393 | -11.395 | 0.00 | 0.00 | PROA |
| 789 | ATOM | 789 | HE1 | PHE | P | 50 | 0.448  | -19.472 | -11.114 | 0.00 | 0.00 | PROA |
| 790 | ATOM | 790 | CZ  | PHE | P | 50 | 0.262  | -21.600 | -11.115 | 0.00 | 0.00 | PROA |
| 791 | ATOM | 791 | HZ  | PHE | P | 50 | -0.634 | -21.642 | -10.514 | 0.00 | 0.00 | PROA |
| 792 | ATOM | 792 | CD2 | PHE | P | 50 | 2.167  | -22.735 | -12.103 | 0.00 | 0.00 | PROA |
| 793 | ATOM | 793 | HD2 | PHE | P | 50 | 2.611  | -23.654 | -12.454 | 0.00 | 0.00 | PROA |
| 794 | ATOM | 794 | CE2 | PHE | P | 50 | 0.883  | -22.768 | -11.528 | 0.00 | 0.00 | PROA |
| 795 | ATOM | 795 | HE2 | PHE | P | 50 | 0.466  | -23.720 | -11.236 | 0.00 | 0.00 | PROA |
| 796 | ATOM | 796 | C   | PHE | P | 50 | 3.798  | -22.832 | -15.095 | 0.00 | 0.00 | PROA |
| 797 | ATOM | 797 | O   | PHE | P | 50 | 2.732  | -22.814 | -15.726 | 0.00 | 0.00 | PROA |
| 798 | ATOM | 798 | N   | ILE | P | 51 | 4.525  | -23.941 | -15.046 | 0.00 | 0.00 | PROA |
| 799 | ATOM | 799 | HN  | ILE | P | 51 | 5.453  | -24.019 | -14.689 | 0.00 | 0.00 | PROA |
| 800 | ATOM | 800 | CA  | ILE | P | 51 | 4.212  | -25.240 | -15.434 | 0.00 | 0.00 | PROA |
| 801 | ATOM | 801 | HA  | ILE | P | 51 | 3.848  | -25.274 | -16.450 | 0.00 | 0.00 | PROA |
| 802 | ATOM | 802 | CB  | ILE | P | 51 | 5.431  | -26.167 | -15.363 | 0.00 | 0.00 | PROA |
| 803 | ATOM | 803 | HB  | ILE | P | 51 | 5.935  | -25.991 | -14.388 | 0.00 | 0.00 | PROA |

|     |      |     |      |     |   |    |        |         |         |      |      |      |
|-----|------|-----|------|-----|---|----|--------|---------|---------|------|------|------|
| 804 | ATOM | 804 | CG2  | ILE | P | 51 | 5.100  | -27.625 | -15.662 | 0.00 | 0.00 | PROA |
| 805 | ATOM | 805 | HG21 | ILE | P | 51 | 4.433  | -27.669 | -16.550 | 0.00 | 0.00 | PROA |
| 806 | ATOM | 806 | HG22 | ILE | P | 51 | 4.559  | -27.976 | -14.758 | 0.00 | 0.00 | PROA |
| 807 | ATOM | 807 | HG23 | ILE | P | 51 | 6.061  | -28.124 | -15.907 | 0.00 | 0.00 | PROA |
| 808 | ATOM | 808 | CG1  | ILE | P | 51 | 6.587  | -25.612 | -16.266 | 0.00 | 0.00 | PROA |
| 809 | ATOM | 809 | HG11 | ILE | P | 51 | 6.960  | -24.758 | -15.661 | 0.00 | 0.00 | PROA |
| 810 | ATOM | 810 | HG12 | ILE | P | 51 | 6.141  | -25.195 | -17.194 | 0.00 | 0.00 | PROA |
| 811 | ATOM | 811 | CD   | ILE | P | 51 | 7.769  | -26.556 | -16.663 | 0.00 | 0.00 | PROA |
| 812 | ATOM | 812 | HD1  | ILE | P | 51 | 7.447  | -27.585 | -16.931 | 0.00 | 0.00 | PROA |
| 813 | ATOM | 813 | HD2  | ILE | P | 51 | 8.413  | -26.663 | -15.763 | 0.00 | 0.00 | PROA |
| 814 | ATOM | 814 | HD3  | ILE | P | 51 | 8.197  | -26.109 | -17.585 | 0.00 | 0.00 | PROA |
| 815 | ATOM | 815 | C    | ILE | P | 51 | 3.136  | -25.839 | -14.567 | 0.00 | 0.00 | PROA |
| 816 | ATOM | 816 | O    | ILE | P | 51 | 3.454  | -26.208 | -13.427 | 0.00 | 0.00 | PROA |
| 817 | ATOM | 817 | N    | VAL | P | 52 | 1.942  | -25.932 | -15.149 | 0.00 | 0.00 | PROA |
| 818 | ATOM | 818 | HN   | VAL | P | 52 | 1.771  | -25.654 | -16.091 | 0.00 | 0.00 | PROA |
| 819 | ATOM | 819 | CA   | VAL | P | 52 | 0.875  | -26.437 | -14.248 | 0.00 | 0.00 | PROA |
| 820 | ATOM | 820 | HA   | VAL | P | 52 | 1.215  | -26.610 | -13.237 | 0.00 | 0.00 | PROA |
| 821 | ATOM | 821 | CB   | VAL | P | 52 | -0.321 | -25.425 | -13.984 | 0.00 | 0.00 | PROA |
| 822 | ATOM | 822 | HB   | VAL | P | 52 | 0.192  | -24.453 | -13.822 | 0.00 | 0.00 | PROA |
| 823 | ATOM | 823 | CG1  | VAL | P | 52 | -1.189 | -25.441 | -15.190 | 0.00 | 0.00 | PROA |
| 824 | ATOM | 824 | HG11 | VAL | P | 52 | -1.918 | -24.624 | -15.000 | 0.00 | 0.00 | PROA |
| 825 | ATOM | 825 | HG12 | VAL | P | 52 | -1.817 | -26.357 | -15.164 | 0.00 | 0.00 | PROA |
| 826 | ATOM | 826 | HG13 | VAL | P | 52 | -0.725 | -25.236 | -16.179 | 0.00 | 0.00 | PROA |
| 827 | ATOM | 827 | CG2  | VAL | P | 52 | -1.054 | -25.672 | -12.631 | 0.00 | 0.00 | PROA |
| 828 | ATOM | 828 | HG21 | VAL | P | 52 | -1.650 | -26.604 | -12.737 | 0.00 | 0.00 | PROA |
| 829 | ATOM | 829 | HG22 | VAL | P | 52 | -1.751 | -24.817 | -12.495 | 0.00 | 0.00 | PROA |
| 830 | ATOM | 830 | HG23 | VAL | P | 52 | -0.374 | -25.973 | -11.805 | 0.00 | 0.00 | PROA |
| 831 | ATOM | 831 | C    | VAL | P | 52 | 0.423  | -27.846 | -14.613 | 0.00 | 0.00 | PROA |
| 832 | ATOM | 832 | O    | VAL | P | 52 | -0.515 | -28.402 | -14.041 | 0.00 | 0.00 | PROA |
| 833 | ATOM | 833 | N    | SER | P | 53 | 1.082  | -28.471 | -15.529 | 0.00 | 0.00 | PROA |
| 834 | ATOM | 834 | HN   | SER | P | 53 | 1.851  | -28.130 | -16.064 | 0.00 | 0.00 | PROA |
| 835 | ATOM | 835 | CA   | SER | P | 53 | 0.813  | -29.850 | -15.732 | 0.00 | 0.00 | PROA |
| 836 | ATOM | 836 | HA   | SER | P | 53 | 0.550  | -30.303 | -14.788 | 0.00 | 0.00 | PROA |
| 837 | ATOM | 837 | CB   | SER | P | 53 | -0.454 | -30.115 | -16.641 | 0.00 | 0.00 | PROA |
| 838 | ATOM | 838 | HB1  | SER | P | 53 | -1.308 | -29.412 | -16.534 | 0.00 | 0.00 | PROA |
| 839 | ATOM | 839 | HB2  | SER | P | 53 | -0.828 | -31.143 | -16.451 | 0.00 | 0.00 | PROA |
| 840 | ATOM | 840 | OG   | SER | P | 53 | -0.177 | -30.186 | -18.054 | 0.00 | 0.00 | PROA |
| 841 | ATOM | 841 | HG1  | SER | P | 53 | -1.026 | -30.144 | -18.500 | 0.00 | 0.00 | PROA |
| 842 | ATOM | 842 | C    | SER | P | 53 | 2.004  | -30.598 | -16.237 | 0.00 | 0.00 | PROA |
| 843 | ATOM | 843 | O    | SER | P | 53 | 3.035  | -30.120 | -16.704 | 0.00 | 0.00 | PROA |
| 844 | ATOM | 844 | N    | GLU | P | 54 | 2.010  | -31.910 | -15.989 | 0.00 | 0.00 | PROA |
| 845 | ATOM | 845 | HN   | GLU | P | 54 | 1.283  | -32.389 | -15.503 | 0.00 | 0.00 | PROA |
| 846 | ATOM | 846 | CA   | GLU | P | 54 | 3.017  | -32.807 | -16.427 | 0.00 | 0.00 | PROA |
| 847 | ATOM | 847 | HA   | GLU | P | 54 | 3.904  | -32.278 | -16.114 | 0.00 | 0.00 | PROA |
| 848 | ATOM | 848 | CB   | GLU | P | 54 | 2.863  | -34.197 | -15.740 | 0.00 | 0.00 | PROA |
| 849 | ATOM | 849 | HB1  | GLU | P | 54 | 3.707  | -34.891 | -15.945 | 0.00 | 0.00 | PROA |
| 850 | ATOM | 850 | HB2  | GLU | P | 54 | 1.926  | -34.712 | -16.041 | 0.00 | 0.00 | PROA |
| 851 | ATOM | 851 | CG   | GLU | P | 54 | 2.850  | -34.071 | -14.183 | 0.00 | 0.00 | PROA |
| 852 | ATOM | 852 | HG1  | GLU | P | 54 | 1.990  | -33.436 | -13.881 | 0.00 | 0.00 | PROA |
| 853 | ATOM | 853 | HG2  | GLU | P | 54 | 3.812  | -33.621 | -13.857 | 0.00 | 0.00 | PROA |
| 854 | ATOM | 854 | CD   | GLU | P | 54 | 2.493  | -35.370 | -13.483 | 0.00 | 0.00 | PROA |
| 855 | ATOM | 855 | OE1  | GLU | P | 54 | 1.462  | -35.388 | -12.789 | 0.00 | 0.00 | PROA |
| 856 | ATOM | 856 | OE2  | GLU | P | 54 | 3.264  | -36.301 | -13.539 | 0.00 | 0.00 | PROA |
| 857 | ATOM | 857 | C    | GLU | P | 54 | 3.135  | -33.053 | -17.945 | 0.00 | 0.00 | PROA |
| 858 | ATOM | 858 | O    | GLU | P | 54 | 4.218  | -33.393 | -18.469 | 0.00 | 0.00 | PROA |
| 859 | ATOM | 859 | N    | ASP | P | 55 | 2.011  | -32.801 | -18.664 | 0.00 | 0.00 | PROA |
| 860 | ATOM | 860 | HN   | ASP | P | 55 | 1.208  | -32.635 | -18.097 | 0.00 | 0.00 | PROA |
| 861 | ATOM | 861 | CA   | ASP | P | 55 | 1.974  | -32.866 | -20.102 | 0.00 | 0.00 | PROA |
| 862 | ATOM | 862 | HA   | ASP | P | 55 | 2.829  | -33.412 | -20.474 | 0.00 | 0.00 | PROA |
| 863 | ATOM | 863 | CB   | ASP | P | 55 | 0.716  | -33.520 | -20.719 | 0.00 | 0.00 | PROA |
| 864 | ATOM | 864 | HB1  | ASP | P | 55 | 0.658  | -33.231 | -21.790 | 0.00 | 0.00 | PROA |
| 865 | ATOM | 865 | HB2  | ASP | P | 55 | -0.095 | -33.202 | -20.030 | 0.00 | 0.00 | PROA |
| 866 | ATOM | 866 | CG   | ASP | P | 55 | 0.869  | -34.991 | -20.692 | 0.00 | 0.00 | PROA |
| 867 | ATOM | 867 | OD1  | ASP | P | 55 | -0.228 | -35.675 | -20.845 | 0.00 | 0.00 | PROA |
| 868 | ATOM | 868 | OD2  | ASP | P | 55 | 1.963  | -35.486 | -20.817 | 0.00 | 0.00 | PROA |
| 869 | ATOM | 869 | C    | ASP | P | 55 | 2.283  | -31.519 | -20.682 | 0.00 | 0.00 | PROA |
| 870 | ATOM | 870 | O    | ASP | P | 55 | 2.202  | -31.363 | -21.862 | 0.00 | 0.00 | PROA |
| 871 | ATOM | 871 | N    | GLY | P | 56 | 2.731  | -30.521 | -19.901 | 0.00 | 0.00 | PROA |
| 872 | ATOM | 872 | HN   | GLY | P | 56 | 2.807  | -30.614 | -18.911 | 0.00 | 0.00 | PROA |
| 873 | ATOM | 873 | CA   | GLY | P | 56 | 3.274  | -29.270 | -20.438 | 0.00 | 0.00 | PROA |
| 874 | ATOM | 874 | HA1  | GLY | P | 56 | 3.726  | -29.336 | -21.417 | 0.00 | 0.00 | PROA |
| 875 | ATOM | 875 | HA2  | GLY | P | 56 | 3.996  | -28.912 | -19.719 | 0.00 | 0.00 | PROA |
| 876 | ATOM | 876 | C    | GLY | P | 56 | 2.281  | -28.117 | -20.623 | 0.00 | 0.00 | PROA |

|     |      |     |      |     |   |    |        |         |         |      |      |      |
|-----|------|-----|------|-----|---|----|--------|---------|---------|------|------|------|
| 877 | ATOM | 877 | O    | GLY | P | 56 | 2.413  | -27.339 | -21.598 | 0.00 | 0.00 | PROA |
| 878 | ATOM | 878 | N    | LEU | P | 57 | 1.247  | -27.961 | -19.719 | 0.00 | 0.00 | PROA |
| 879 | ATOM | 879 | HN   | LEU | P | 57 | 1.122  | -28.646 | -19.005 | 0.00 | 0.00 | PROA |
| 880 | ATOM | 880 | CA   | LEU | P | 57 | 0.360  | -26.775 | -19.689 | 0.00 | 0.00 | PROA |
| 881 | ATOM | 881 | HA   | LEU | P | 57 | 0.169  | -26.523 | -20.722 | 0.00 | 0.00 | PROA |
| 882 | ATOM | 882 | CB   | LEU | P | 57 | -1.022 | -27.013 | -19.046 | 0.00 | 0.00 | PROA |
| 883 | ATOM | 883 | HB1  | LEU | P | 57 | -1.635 | -26.127 | -18.777 | 0.00 | 0.00 | PROA |
| 884 | ATOM | 884 | HB2  | LEU | P | 57 | -0.783 | -27.518 | -18.086 | 0.00 | 0.00 | PROA |
| 885 | ATOM | 885 | CG   | LEU | P | 57 | -1.982 | -27.965 | -19.881 | 0.00 | 0.00 | PROA |
| 886 | ATOM | 886 | HG   | LEU | P | 57 | -1.380 | -28.870 | -20.109 | 0.00 | 0.00 | PROA |
| 887 | ATOM | 887 | CD1  | LEU | P | 57 | -3.255 | -28.235 | -18.998 | 0.00 | 0.00 | PROA |
| 888 | ATOM | 888 | HD11 | LEU | P | 57 | -3.797 | -27.282 | -18.817 | 0.00 | 0.00 | PROA |
| 889 | ATOM | 889 | HD12 | LEU | P | 57 | -3.179 | -28.728 | -18.005 | 0.00 | 0.00 | PROA |
| 890 | ATOM | 890 | HD13 | LEU | P | 57 | -3.907 | -28.906 | -19.597 | 0.00 | 0.00 | PROA |
| 891 | ATOM | 891 | CD2  | LEU | P | 57 | -2.448 | -27.280 | -21.191 | 0.00 | 0.00 | PROA |
| 892 | ATOM | 892 | HD21 | LEU | P | 57 | -3.010 | -27.978 | -21.848 | 0.00 | 0.00 | PROA |
| 893 | ATOM | 893 | HD22 | LEU | P | 57 | -1.530 | -27.014 | -21.758 | 0.00 | 0.00 | PROA |
| 894 | ATOM | 894 | HD23 | LEU | P | 57 | -2.951 | -26.344 | -20.867 | 0.00 | 0.00 | PROA |
| 895 | ATOM | 895 | C    | LEU | P | 57 | 1.100  | -25.708 | -19.069 | 0.00 | 0.00 | PROA |
| 896 | ATOM | 896 | O    | LEU | P | 57 | 1.624  | -25.835 | -17.983 | 0.00 | 0.00 | PROA |
| 897 | ATOM | 897 | N    | ILE | P | 58 | 1.169  | -24.540 | -19.757 | 0.00 | 0.00 | PROA |
| 898 | ATOM | 898 | HN   | ILE | P | 58 | 1.049  | -24.598 | -20.745 | 0.00 | 0.00 | PROA |
| 899 | ATOM | 899 | CA   | ILE | P | 58 | 1.718  | -23.343 | -19.138 | 0.00 | 0.00 | PROA |
| 900 | ATOM | 900 | HA   | ILE | P | 58 | 2.360  | -23.596 | -18.307 | 0.00 | 0.00 | PROA |
| 901 | ATOM | 901 | CB   | ILE | P | 58 | 2.708  | -22.670 | -20.050 | 0.00 | 0.00 | PROA |
| 902 | ATOM | 902 | HB   | ILE | P | 58 | 2.258  | -22.430 | -21.037 | 0.00 | 0.00 | PROA |
| 903 | ATOM | 903 | CG2  | ILE | P | 58 | 3.356  | -21.325 | -19.420 | 0.00 | 0.00 | PROA |
| 904 | ATOM | 904 | HG21 | ILE | P | 58 | 3.838  | -21.495 | -18.434 | 0.00 | 0.00 | PROA |
| 905 | ATOM | 905 | HG22 | ILE | P | 58 | 2.516  | -20.599 | -19.450 | 0.00 | 0.00 | PROA |
| 906 | ATOM | 906 | HG23 | ILE | P | 58 | 4.050  | -20.900 | -20.177 | 0.00 | 0.00 | PROA |
| 907 | ATOM | 907 | CG1  | ILE | P | 58 | 3.846  | -23.725 | -20.429 | 0.00 | 0.00 | PROA |
| 908 | ATOM | 908 | HG11 | ILE | P | 58 | 4.522  | -23.200 | -21.137 | 0.00 | 0.00 | PROA |
| 909 | ATOM | 909 | HG12 | ILE | P | 58 | 3.435  | -24.532 | -21.071 | 0.00 | 0.00 | PROA |
| 910 | ATOM | 910 | CD   | ILE | P | 58 | 4.749  | -24.190 | -19.251 | 0.00 | 0.00 | PROA |
| 911 | ATOM | 911 | HD1  | ILE | P | 58 | 5.212  | -23.323 | -18.733 | 0.00 | 0.00 | PROA |
| 912 | ATOM | 912 | HD2  | ILE | P | 58 | 5.673  | -24.743 | -19.522 | 0.00 | 0.00 | PROA |
| 913 | ATOM | 913 | HD3  | ILE | P | 58 | 4.124  | -24.734 | -18.510 | 0.00 | 0.00 | PROA |
| 914 | ATOM | 914 | C    | ILE | P | 58 | 0.525  | -22.471 | -18.792 | 0.00 | 0.00 | PROA |
| 915 | ATOM | 915 | O    | ILE | P | 58 | -0.354 | -22.226 | -19.639 | 0.00 | 0.00 | PROA |
| 916 | ATOM | 916 | N    | VAL | P | 59 | 0.521  | -21.808 | -17.610 | 0.00 | 0.00 | PROA |
| 917 | ATOM | 917 | HN   | VAL | P | 59 | 1.295  | -21.902 | -16.989 | 0.00 | 0.00 | PROA |
| 918 | ATOM | 918 | CA   | VAL | P | 59 | -0.565 | -21.020 | -17.107 | 0.00 | 0.00 | PROA |
| 919 | ATOM | 919 | HA   | VAL | P | 59 | -1.262 | -20.814 | -17.906 | 0.00 | 0.00 | PROA |
| 920 | ATOM | 920 | CB   | VAL | P | 59 | -1.267 | -21.620 | -15.941 | 0.00 | 0.00 | PROA |
| 921 | ATOM | 921 | HB   | VAL | P | 59 | -1.636 | -22.651 | -16.130 | 0.00 | 0.00 | PROA |
| 922 | ATOM | 922 | CG1  | VAL | P | 59 | -0.484 | -21.551 | -14.582 | 0.00 | 0.00 | PROA |
| 923 | ATOM | 923 | HG11 | VAL | P | 59 | -0.185 | -20.541 | -14.227 | 0.00 | 0.00 | PROA |
| 924 | ATOM | 924 | HG12 | VAL | P | 59 | 0.464  | -22.053 | -14.871 | 0.00 | 0.00 | PROA |
| 925 | ATOM | 925 | HG13 | VAL | P | 59 | -0.926 | -22.043 | -13.689 | 0.00 | 0.00 | PROA |
| 926 | ATOM | 926 | CG2  | VAL | P | 59 | -2.669 | -20.907 | -15.865 | 0.00 | 0.00 | PROA |
| 927 | ATOM | 927 | HG21 | VAL | P | 59 | -2.678 | -19.847 | -15.531 | 0.00 | 0.00 | PROA |
| 928 | ATOM | 928 | HG22 | VAL | P | 59 | -3.279 | -21.502 | -15.153 | 0.00 | 0.00 | PROA |
| 929 | ATOM | 929 | HG23 | VAL | P | 59 | -3.283 | -20.872 | -16.791 | 0.00 | 0.00 | PROA |
| 930 | ATOM | 930 | C    | VAL | P | 59 | -0.011 | -19.656 | -16.837 | 0.00 | 0.00 | PROA |
| 931 | ATOM | 931 | O    | VAL | P | 59 | 1.102  | -19.437 | -16.396 | 0.00 | 0.00 | PROA |
| 932 | ATOM | 932 | N    | THR | P | 60 | -0.768 | -18.620 | -17.294 | 0.00 | 0.00 | PROA |
| 933 | ATOM | 933 | HN   | THR | P | 60 | -1.633 | -18.797 | -17.757 | 0.00 | 0.00 | PROA |
| 934 | ATOM | 934 | CA   | THR | P | 60 | -0.413 | -17.218 | -17.244 | 0.00 | 0.00 | PROA |
| 935 | ATOM | 935 | HA   | THR | P | 60 | 0.012  | -17.011 | -16.274 | 0.00 | 0.00 | PROA |
| 936 | ATOM | 936 | CB   | THR | P | 60 | 0.565  | -16.789 | -18.370 | 0.00 | 0.00 | PROA |
| 937 | ATOM | 937 | HB   | THR | P | 60 | 1.395  | -17.520 | -18.465 | 0.00 | 0.00 | PROA |
| 938 | ATOM | 938 | OG1  | THR | P | 60 | 1.112  | -15.491 | -18.161 | 0.00 | 0.00 | PROA |
| 939 | ATOM | 939 | HG1  | THR | P | 60 | 2.008  | -15.639 | -17.851 | 0.00 | 0.00 | PROA |
| 940 | ATOM | 940 | CG2  | THR | P | 60 | -0.135 | -16.755 | -19.670 | 0.00 | 0.00 | PROA |
| 941 | ATOM | 941 | HG21 | THR | P | 60 | -0.592 | -17.722 | -19.969 | 0.00 | 0.00 | PROA |
| 942 | ATOM | 942 | HG22 | THR | P | 60 | 0.668  | -16.437 | -20.369 | 0.00 | 0.00 | PROA |
| 943 | ATOM | 943 | HG23 | THR | P | 60 | -0.929 | -15.978 | -19.683 | 0.00 | 0.00 | PROA |
| 944 | ATOM | 944 | C    | THR | P | 60 | -1.562 | -16.352 | -17.070 | 0.00 | 0.00 | PROA |
| 945 | ATOM | 945 | O    | THR | P | 60 | -2.644 | -16.859 | -16.803 | 0.00 | 0.00 | PROA |
| 946 | ATOM | 946 | N    | ASN | P | 61 | -1.410 | -14.996 | -17.234 | 0.00 | 0.00 | PROA |
| 947 | ATOM | 947 | HN   | ASN | P | 61 | -0.536 | -14.614 | -17.523 | 0.00 | 0.00 | PROA |
| 948 | ATOM | 948 | CA   | ASN | P | 61 | -2.479 | -14.055 | -17.084 | 0.00 | 0.00 | PROA |
| 949 | ATOM | 949 | HA   | ASN | P | 61 | -3.259 | -14.585 | -16.558 | 0.00 | 0.00 | PROA |

|      |      |      |      |     |   |    |        |         |         |      |      |      |
|------|------|------|------|-----|---|----|--------|---------|---------|------|------|------|
| 950  | ATOM | 950  | CB   | ASN | P | 61 | -2.094 | -12.770 | -16.264 | 0.00 | 0.00 | PROA |
| 951  | ATOM | 951  | HB1  | ASN | P | 61 | -2.997 | -12.137 | -16.135 | 0.00 | 0.00 | PROA |
| 952  | ATOM | 952  | HB2  | ASN | P | 61 | -1.485 | -12.081 | -16.887 | 0.00 | 0.00 | PROA |
| 953  | ATOM | 953  | CG   | ASN | P | 61 | -1.369 | -13.054 | -14.911 | 0.00 | 0.00 | PROA |
| 954  | ATOM | 954  | OD1  | ASN | P | 61 | -0.359 | -12.412 | -14.802 | 0.00 | 0.00 | PROA |
| 955  | ATOM | 955  | ND2  | ASN | P | 61 | -1.935 | -13.889 | -14.075 | 0.00 | 0.00 | PROA |
| 956  | ATOM | 956  | HD21 | ASN | P | 61 | -1.648 | -13.834 | -13.119 | 0.00 | 0.00 | PROA |
| 957  | ATOM | 957  | HD22 | ASN | P | 61 | -2.766 | -14.374 | -14.349 | 0.00 | 0.00 | PROA |
| 958  | ATOM | 958  | C    | ASN | P | 61 | -3.159 | -13.461 | -18.329 | 0.00 | 0.00 | PROA |
| 959  | ATOM | 959  | O    | ASN | P | 61 | -2.574 | -13.403 | -19.412 | 0.00 | 0.00 | PROA |
| 960  | ATOM | 960  | N    | ALA | P | 62 | -4.386 | -13.050 | -18.280 | 0.00 | 0.00 | PROA |
| 961  | ATOM | 961  | HN   | ALA | P | 62 | -4.839 | -12.775 | -17.435 | 0.00 | 0.00 | PROA |
| 962  | ATOM | 962  | CA   | ALA | P | 62 | -5.187 | -12.860 | -19.479 | 0.00 | 0.00 | PROA |
| 963  | ATOM | 963  | HA   | ALA | P | 62 | -4.985 | -13.687 | -20.144 | 0.00 | 0.00 | PROA |
| 964  | ATOM | 964  | CB   | ALA | P | 62 | -6.635 | -12.861 | -18.990 | 0.00 | 0.00 | PROA |
| 965  | ATOM | 965  | HB1  | ALA | P | 62 | -7.248 | -12.614 | -19.883 | 0.00 | 0.00 | PROA |
| 966  | ATOM | 966  | HB2  | ALA | P | 62 | -6.905 | -11.942 | -18.426 | 0.00 | 0.00 | PROA |
| 967  | ATOM | 967  | HB3  | ALA | P | 62 | -6.982 | -13.776 | -18.464 | 0.00 | 0.00 | PROA |
| 968  | ATOM | 968  | C    | ALA | P | 62 | -4.822 | -11.569 | -20.226 | 0.00 | 0.00 | PROA |
| 969  | ATOM | 969  | O    | ALA | P | 62 | -5.202 | -11.480 | -21.400 | 0.00 | 0.00 | PROA |
| 970  | ATOM | 970  | N    | HSD | P | 63 | -4.113 | -10.607 | -19.563 | 0.00 | 0.00 | PROA |
| 971  | ATOM | 971  | HN   | HSD | P | 63 | -4.031 | -10.855 | -18.600 | 0.00 | 0.00 | PROA |
| 972  | ATOM | 972  | CA   | HSD | P | 63 | -3.688 | -9.308  | -20.075 | 0.00 | 0.00 | PROA |
| 973  | ATOM | 973  | HA   | HSD | P | 63 | -4.384 | -8.882  | -20.783 | 0.00 | 0.00 | PROA |
| 974  | ATOM | 974  | CB   | HSD | P | 63 | -3.616 | -8.277  | -18.868 | 0.00 | 0.00 | PROA |
| 975  | ATOM | 975  | HB1  | HSD | P | 63 | -4.636 | -8.217  | -18.431 | 0.00 | 0.00 | PROA |
| 976  | ATOM | 976  | HB2  | HSD | P | 63 | -3.446 | -7.278  | -19.322 | 0.00 | 0.00 | PROA |
| 977  | ATOM | 977  | ND1  | HSD | P | 63 | -2.754 | -9.251  | -16.517 | 0.00 | 0.00 | PROA |
| 978  | ATOM | 978  | HD1  | HSD | P | 63 | -3.646 | -9.614  | -16.250 | 0.00 | 0.00 | PROA |
| 979  | ATOM | 979  | CG   | HSD | P | 63 | -2.521 | -8.699  | -17.778 | 0.00 | 0.00 | PROA |
| 980  | ATOM | 980  | CE1  | HSD | P | 63 | -1.603 | -9.330  | -15.839 | 0.00 | 0.00 | PROA |
| 981  | ATOM | 981  | HE1  | HSD | P | 63 | -1.409 | -9.816  | -14.883 | 0.00 | 0.00 | PROA |
| 982  | ATOM | 982  | NE2  | HSD | P | 63 | -0.621 | -8.793  | -16.574 | 0.00 | 0.00 | PROA |
| 983  | ATOM | 983  | CD2  | HSD | P | 63 | -1.166 | -8.404  | -17.795 | 0.00 | 0.00 | PROA |
| 984  | ATOM | 984  | HD2  | HSD | P | 63 | -0.712 | -8.007  | -18.695 | 0.00 | 0.00 | PROA |
| 985  | ATOM | 985  | C    | HSD | P | 63 | -2.365 | -9.394  | -20.809 | 0.00 | 0.00 | PROA |
| 986  | ATOM | 986  | O    | HSD | P | 63 | -1.865 | -8.345  | -21.223 | 0.00 | 0.00 | PROA |
| 987  | ATOM | 987  | N    | VAL | P | 64 | -1.781 | -10.593 | -21.070 | 0.00 | 0.00 | PROA |
| 988  | ATOM | 988  | HN   | VAL | P | 64 | -2.227 | -11.390 | -20.671 | 0.00 | 0.00 | PROA |
| 989  | ATOM | 989  | CA   | VAL | P | 64 | -0.532 | -10.794 | -21.688 | 0.00 | 0.00 | PROA |
| 990  | ATOM | 990  | HA   | VAL | P | 64 | -0.095 | -9.839  | -21.937 | 0.00 | 0.00 | PROA |
| 991  | ATOM | 991  | CB   | VAL | P | 64 | 0.401  | -11.687 | -20.827 | 0.00 | 0.00 | PROA |
| 992  | ATOM | 992  | HB   | VAL | P | 64 | -0.056 | -12.613 | -20.419 | 0.00 | 0.00 | PROA |
| 993  | ATOM | 993  | CG1  | VAL | P | 64 | 1.615  | -12.159 | -21.609 | 0.00 | 0.00 | PROA |
| 994  | ATOM | 994  | HG11 | VAL | P | 64 | 2.047  | -11.259 | -22.097 | 0.00 | 0.00 | PROA |
| 995  | ATOM | 995  | HG12 | VAL | P | 64 | 1.376  | -12.894 | -22.407 | 0.00 | 0.00 | PROA |
| 996  | ATOM | 996  | HG13 | VAL | P | 64 | 2.397  | -12.586 | -20.946 | 0.00 | 0.00 | PROA |
| 997  | ATOM | 997  | CG2  | VAL | P | 64 | 0.941  | -10.920 | -19.665 | 0.00 | 0.00 | PROA |
| 998  | ATOM | 998  | HG21 | VAL | P | 64 | 0.139  | -10.518 | -19.009 | 0.00 | 0.00 | PROA |
| 999  | ATOM | 999  | HG22 | VAL | P | 64 | 1.370  | -9.980  | -20.073 | 0.00 | 0.00 | PROA |
| 1000 | ATOM | 1000 | HG23 | VAL | P | 64 | 1.686  | -11.495 | -19.074 | 0.00 | 0.00 | PROA |
| 1001 | ATOM | 1001 | C    | VAL | P | 64 | -0.691 | -11.371 | -23.031 | 0.00 | 0.00 | PROA |
| 1002 | ATOM | 1002 | O    | VAL | P | 64 | -0.004 | -11.160 | -24.009 | 0.00 | 0.00 | PROA |
| 1003 | ATOM | 1003 | N    | VAL | P | 65 | -1.853 | -11.953 | -23.186 | 0.00 | 0.00 | PROA |
| 1004 | ATOM | 1004 | HN   | VAL | P | 65 | -2.386 | -11.816 | -22.354 | 0.00 | 0.00 | PROA |
| 1005 | ATOM | 1005 | CA   | VAL | P | 65 | -2.510 | -12.512 | -24.377 | 0.00 | 0.00 | PROA |
| 1006 | ATOM | 1006 | HA   | VAL | P | 65 | -1.928 | -13.360 | -24.707 | 0.00 | 0.00 | PROA |
| 1007 | ATOM | 1007 | CB   | VAL | P | 65 | -3.854 | -13.281 | -24.066 | 0.00 | 0.00 | PROA |
| 1008 | ATOM | 1008 | HB   | VAL | P | 65 | -4.562 | -12.498 | -23.718 | 0.00 | 0.00 | PROA |
| 1009 | ATOM | 1009 | CG1  | VAL | P | 65 | -4.444 | -13.852 | -25.359 | 0.00 | 0.00 | PROA |
| 1010 | ATOM | 1010 | HG11 | VAL | P | 65 | -3.830 | -14.525 | -25.994 | 0.00 | 0.00 | PROA |
| 1011 | ATOM | 1011 | HG12 | VAL | P | 65 | -4.811 | -13.050 | -26.035 | 0.00 | 0.00 | PROA |
| 1012 | ATOM | 1012 | HG13 | VAL | P | 65 | -5.431 | -14.266 | -25.060 | 0.00 | 0.00 | PROA |
| 1013 | ATOM | 1013 | CG2  | VAL | P | 65 | -3.725 | -14.346 | -22.989 | 0.00 | 0.00 | PROA |
| 1014 | ATOM | 1014 | HG21 | VAL | P | 65 | -3.605 | -13.866 | -21.995 | 0.00 | 0.00 | PROA |
| 1015 | ATOM | 1015 | HG22 | VAL | P | 65 | -2.903 | -15.040 | -23.268 | 0.00 | 0.00 | PROA |
| 1016 | ATOM | 1016 | HG23 | VAL | P | 65 | -4.630 | -14.952 | -22.770 | 0.00 | 0.00 | PROA |
| 1017 | ATOM | 1017 | C    | VAL | P | 65 | -2.478 | -11.540 | -25.610 | 0.00 | 0.00 | PROA |
| 1018 | ATOM | 1018 | O    | VAL | P | 65 | -2.673 | -10.324 | -25.518 | 0.00 | 0.00 | PROA |
| 1019 | ATOM | 1019 | N    | THR | P | 66 | -2.291 | -12.056 | -26.813 | 0.00 | 0.00 | PROA |
| 1020 | ATOM | 1020 | HN   | THR | P | 66 | -2.143 | -13.030 | -26.966 | 0.00 | 0.00 | PROA |
| 1021 | ATOM | 1021 | CA   | THR | P | 66 | -2.646 | -11.328 | -27.972 | 0.00 | 0.00 | PROA |
| 1022 | ATOM | 1022 | HA   | THR | P | 66 | -3.632 | -10.897 | -27.878 | 0.00 | 0.00 | PROA |

|      |      |      |      |     |   |    |        |         |         |      |      |      |
|------|------|------|------|-----|---|----|--------|---------|---------|------|------|------|
| 1023 | ATOM | 1023 | CB   | THR | P | 66 | -1.650 | -10.138 | -28.415 | 0.00 | 0.00 | PROA |
| 1024 | ATOM | 1024 | HB   | THR | P | 66 | -1.936 | -9.271  | -27.781 | 0.00 | 0.00 | PROA |
| 1025 | ATOM | 1025 | OG1  | THR | P | 66 | -1.814 | -9.814  | -29.817 | 0.00 | 0.00 | PROA |
| 1026 | ATOM | 1026 | HG1  | THR | P | 66 | -2.585 | -9.267  | -29.980 | 0.00 | 0.00 | PROA |
| 1027 | ATOM | 1027 | CG2  | THR | P | 66 | -0.168 | -10.561 | -28.188 | 0.00 | 0.00 | PROA |
| 1028 | ATOM | 1028 | HG21 | THR | P | 66 | 0.020  | -10.665 | -27.098 | 0.00 | 0.00 | PROA |
| 1029 | ATOM | 1029 | HG22 | THR | P | 66 | 0.549  | -9.810  | -28.583 | 0.00 | 0.00 | PROA |
| 1030 | ATOM | 1030 | HG23 | THR | P | 66 | -0.019 | -11.497 | -28.768 | 0.00 | 0.00 | PROA |
| 1031 | ATOM | 1031 | C    | THR | P | 66 | -2.843 | -12.426 | -29.043 | 0.00 | 0.00 | PROA |
| 1032 | ATOM | 1032 | O    | THR | P | 66 | -2.175 | -13.462 | -29.057 | 0.00 | 0.00 | PROA |
| 1033 | ATOM | 1033 | N    | ASN | P | 67 | -3.816 | -12.215 | -29.954 | 0.00 | 0.00 | PROA |
| 1034 | ATOM | 1034 | HN   | ASN | P | 67 | -4.298 | -11.344 | -30.007 | 0.00 | 0.00 | PROA |
| 1035 | ATOM | 1035 | CA   | ASN | P | 67 | -4.103 | -13.135 | -31.048 | 0.00 | 0.00 | PROA |
| 1036 | ATOM | 1036 | HA   | ASN | P | 67 | -3.784 | -14.127 | -30.766 | 0.00 | 0.00 | PROA |
| 1037 | ATOM | 1037 | CB   | ASN | P | 67 | -5.605 | -13.132 | -31.434 | 0.00 | 0.00 | PROA |
| 1038 | ATOM | 1038 | HB1  | ASN | P | 67 | -5.791 | -13.809 | -32.295 | 0.00 | 0.00 | PROA |
| 1039 | ATOM | 1039 | HB2  | ASN | P | 67 | -5.961 | -12.125 | -31.736 | 0.00 | 0.00 | PROA |
| 1040 | ATOM | 1040 | CG   | ASN | P | 67 | -6.570 | -13.518 | -30.287 | 0.00 | 0.00 | PROA |
| 1041 | ATOM | 1041 | OD1  | ASN | P | 67 | -7.495 | -12.829 | -30.055 | 0.00 | 0.00 | PROA |
| 1042 | ATOM | 1042 | ND2  | ASN | P | 67 | -6.342 | -14.688 | -29.545 | 0.00 | 0.00 | PROA |
| 1043 | ATOM | 1043 | HD21 | ASN | P | 67 | -6.867 | -14.794 | -28.700 | 0.00 | 0.00 | PROA |
| 1044 | ATOM | 1044 | HD22 | ASN | P | 67 | -5.822 | -15.437 | -29.956 | 0.00 | 0.00 | PROA |
| 1045 | ATOM | 1045 | C    | ASN | P | 67 | -3.298 | -12.711 | -32.265 | 0.00 | 0.00 | PROA |
| 1046 | ATOM | 1046 | O    | ASN | P | 67 | -3.328 | -13.564 | -33.170 | 0.00 | 0.00 | PROA |
| 1047 | ATOM | 1047 | N    | LYS | P | 68 | -2.523 | -11.656 | -32.232 | 0.00 | 0.00 | PROA |
| 1048 | ATOM | 1048 | HN   | LYS | P | 68 | -2.535 | -11.052 | -31.439 | 0.00 | 0.00 | PROA |
| 1049 | ATOM | 1049 | CA   | LYS | P | 68 | -1.948 | -11.074 | -33.443 | 0.00 | 0.00 | PROA |
| 1050 | ATOM | 1050 | HA   | LYS | P | 68 | -2.263 | -11.526 | -34.372 | 0.00 | 0.00 | PROA |
| 1051 | ATOM | 1051 | CB   | LYS | P | 68 | -2.306 | -9.518  | -33.520 | 0.00 | 0.00 | PROA |
| 1052 | ATOM | 1052 | HB1  | LYS | P | 68 | -1.921 | -9.020  | -34.435 | 0.00 | 0.00 | PROA |
| 1053 | ATOM | 1053 | HB2  | LYS | P | 68 | -1.932 | -8.957  | -32.637 | 0.00 | 0.00 | PROA |
| 1054 | ATOM | 1054 | CG   | LYS | P | 68 | -3.884 | -9.366  | -33.572 | 0.00 | 0.00 | PROA |
| 1055 | ATOM | 1055 | HG1  | LYS | P | 68 | -4.439 | -9.613  | -32.642 | 0.00 | 0.00 | PROA |
| 1056 | ATOM | 1056 | HG2  | LYS | P | 68 | -4.326 | -10.065 | -34.314 | 0.00 | 0.00 | PROA |
| 1057 | ATOM | 1057 | CD   | LYS | P | 68 | -4.224 | -7.832  | -33.761 | 0.00 | 0.00 | PROA |
| 1058 | ATOM | 1058 | HD1  | LYS | P | 68 | -4.113 | -7.524  | -34.822 | 0.00 | 0.00 | PROA |
| 1059 | ATOM | 1059 | HD2  | LYS | P | 68 | -3.526 | -7.238  | -33.133 | 0.00 | 0.00 | PROA |
| 1060 | ATOM | 1060 | CE   | LYS | P | 68 | -5.706 | -7.408  | -33.386 | 0.00 | 0.00 | PROA |
| 1061 | ATOM | 1061 | HE1  | LYS | P | 68 | -5.833 | -6.325  | -33.173 | 0.00 | 0.00 | PROA |
| 1062 | ATOM | 1062 | HE2  | LYS | P | 68 | -5.994 | -8.053  | -32.529 | 0.00 | 0.00 | PROA |
| 1063 | ATOM | 1063 | NZ   | LYS | P | 68 | -6.653 | -7.836  | -34.409 | 0.00 | 0.00 | PROA |
| 1064 | ATOM | 1064 | HZ1  | LYS | P | 68 | -7.015 | -6.959  | -34.836 | 0.00 | 0.00 | PROA |
| 1065 | ATOM | 1065 | HZ2  | LYS | P | 68 | -7.353 | -8.510  | -34.038 | 0.00 | 0.00 | PROA |
| 1066 | ATOM | 1066 | HZ3  | LYS | P | 68 | -6.122 | -8.230  | -35.211 | 0.00 | 0.00 | PROA |
| 1067 | ATOM | 1067 | C    | LYS | P | 68 | -0.460 | -11.308 | -33.589 | 0.00 | 0.00 | PROA |
| 1068 | ATOM | 1068 | O    | LYS | P | 68 | 0.084  | -10.845 | -34.624 | 0.00 | 0.00 | PROA |
| 1069 | ATOM | 1069 | N    | HSD | P | 69 | 0.220  | -11.931 | -32.639 | 0.00 | 0.00 | PROA |
| 1070 | ATOM | 1070 | HN   | HSD | P | 69 | -0.142 | -12.346 | -31.808 | 0.00 | 0.00 | PROA |
| 1071 | ATOM | 1071 | CA   | HSD | P | 69 | 1.600  | -12.123 | -32.625 | 0.00 | 0.00 | PROA |
| 1072 | ATOM | 1072 | HA   | HSD | P | 69 | 1.971  | -12.083 | -33.639 | 0.00 | 0.00 | PROA |
| 1073 | ATOM | 1073 | CB   | HSD | P | 69 | 2.281  | -10.973 | -31.725 | 0.00 | 0.00 | PROA |
| 1074 | ATOM | 1074 | HB1  | HSD | P | 69 | 3.389  | -11.027 | -31.796 | 0.00 | 0.00 | PROA |
| 1075 | ATOM | 1075 | HB2  | HSD | P | 69 | 2.088  | -11.165 | -30.648 | 0.00 | 0.00 | PROA |
| 1076 | ATOM | 1076 | ND1  | HSD | P | 69 | 0.816  | -8.891  | -31.520 | 0.00 | 0.00 | PROA |
| 1077 | ATOM | 1077 | HD1  | HSD | P | 69 | 0.199  | -8.991  | -30.740 | 0.00 | 0.00 | PROA |
| 1078 | ATOM | 1078 | CG   | HSD | P | 69 | 1.744  | -9.677  | -32.145 | 0.00 | 0.00 | PROA |
| 1079 | ATOM | 1079 | CE1  | HSD | P | 69 | 0.756  | -7.753  | -32.267 | 0.00 | 0.00 | PROA |
| 1080 | ATOM | 1080 | HE1  | HSD | P | 69 | -0.016 | -6.990  | -32.158 | 0.00 | 0.00 | PROA |
| 1081 | ATOM | 1081 | NE2  | HSD | P | 69 | 1.631  | -7.662  | -33.191 | 0.00 | 0.00 | PROA |
| 1082 | ATOM | 1082 | CD2  | HSD | P | 69 | 2.264  | -8.896  | -33.139 | 0.00 | 0.00 | PROA |
| 1083 | ATOM | 1083 | HD2  | HSD | P | 69 | 2.942  | -9.170  | -33.938 | 0.00 | 0.00 | PROA |
| 1084 | ATOM | 1084 | C    | HSD | P | 69 | 1.894  | -13.545 | -32.107 | 0.00 | 0.00 | PROA |
| 1085 | ATOM | 1085 | O    | HSD | P | 69 | 0.974  | -14.273 | -31.753 | 0.00 | 0.00 | PROA |
| 1086 | ATOM | 1086 | N    | ARG | P | 70 | 3.119  | -14.026 | -32.317 | 0.00 | 0.00 | PROA |
| 1087 | ATOM | 1087 | HN   | ARG | P | 70 | 3.801  | -13.368 | -32.625 | 0.00 | 0.00 | PROA |
| 1088 | ATOM | 1088 | CA   | ARG | P | 70 | 3.571  | -15.405 | -32.034 | 0.00 | 0.00 | PROA |
| 1089 | ATOM | 1089 | HA   | ARG | P | 70 | 2.804  | -16.057 | -32.424 | 0.00 | 0.00 | PROA |
| 1090 | ATOM | 1090 | CB   | ARG | P | 70 | 4.877  | -15.740 | -32.852 | 0.00 | 0.00 | PROA |
| 1091 | ATOM | 1091 | HB1  | ARG | P | 70 | 5.212  | -16.790 | -32.716 | 0.00 | 0.00 | PROA |
| 1092 | ATOM | 1092 | HB2  | ARG | P | 70 | 5.657  | -15.007 | -32.552 | 0.00 | 0.00 | PROA |
| 1093 | ATOM | 1093 | CG   | ARG | P | 70 | 4.659  | -15.648 | -34.435 | 0.00 | 0.00 | PROA |
| 1094 | ATOM | 1094 | HG1  | ARG | P | 70 | 3.652  | -15.240 | -34.668 | 0.00 | 0.00 | PROA |
| 1095 | ATOM | 1095 | HG2  | ARG | P | 70 | 4.599  | -16.697 | -34.797 | 0.00 | 0.00 | PROA |

|      |      |      |      |     |   |    |        |         |         |      |      |      |
|------|------|------|------|-----|---|----|--------|---------|---------|------|------|------|
| 1096 | ATOM | 1096 | CD   | ARG | P | 70 | 5.691  | -14.814 | -35.143 | 0.00 | 0.00 | PROA |
| 1097 | ATOM | 1097 | HD1  | ARG | P | 70 | 6.653  | -15.366 | -35.070 | 0.00 | 0.00 | PROA |
| 1098 | ATOM | 1098 | HD2  | ARG | P | 70 | 5.829  | -13.819 | -34.670 | 0.00 | 0.00 | PROA |
| 1099 | ATOM | 1099 | NE   | ARG | P | 70 | 5.408  | -14.696 | -36.582 | 0.00 | 0.00 | PROA |
| 1100 | ATOM | 1100 | HE   | ARG | P | 70 | 5.102  | -13.801 | -36.906 | 0.00 | 0.00 | PROA |
| 1101 | ATOM | 1101 | CZ   | ARG | P | 70 | 5.148  | -15.619 | -37.465 | 0.00 | 0.00 | PROA |
| 1102 | ATOM | 1102 | NH1  | ARG | P | 70 | 5.460  | -16.889 | -37.268 | 0.00 | 0.00 | PROA |
| 1103 | ATOM | 1103 | HH11 | ARG | P | 70 | 6.111  | -17.190 | -36.571 | 0.00 | 0.00 | PROA |
| 1104 | ATOM | 1104 | HH12 | ARG | P | 70 | 5.331  | -17.534 | -38.021 | 0.00 | 0.00 | PROA |
| 1105 | ATOM | 1105 | NH2  | ARG | P | 70 | 4.464  | -15.206 | -38.534 | 0.00 | 0.00 | PROA |
| 1106 | ATOM | 1106 | HH21 | ARG | P | 70 | 4.071  | -14.287 | -38.529 | 0.00 | 0.00 | PROA |
| 1107 | ATOM | 1107 | HH22 | ARG | P | 70 | 4.763  | -15.611 | -39.398 | 0.00 | 0.00 | PROA |
| 1108 | ATOM | 1108 | C    | ARG | P | 70 | 3.821  | -15.628 | -30.512 | 0.00 | 0.00 | PROA |
| 1109 | ATOM | 1109 | O    | ARG | P | 70 | 4.240  | -14.677 | -29.840 | 0.00 | 0.00 | PROA |
| 1110 | ATOM | 1110 | N    | VAL | P | 71 | 3.598  | -16.780 | -29.931 | 0.00 | 0.00 | PROA |
| 1111 | ATOM | 1111 | HN   | VAL | P | 71 | 3.074  | -17.430 | -30.477 | 0.00 | 0.00 | PROA |
| 1112 | ATOM | 1112 | CA   | VAL | P | 71 | 3.871  | -17.233 | -28.574 | 0.00 | 0.00 | PROA |
| 1113 | ATOM | 1113 | HA   | VAL | P | 71 | 4.188  | -16.416 | -27.943 | 0.00 | 0.00 | PROA |
| 1114 | ATOM | 1114 | CB   | VAL | P | 71 | 2.691  | -17.654 | -27.734 | 0.00 | 0.00 | PROA |
| 1115 | ATOM | 1115 | HB   | VAL | P | 71 | 2.256  | -18.550 | -28.225 | 0.00 | 0.00 | PROA |
| 1116 | ATOM | 1116 | CG1  | VAL | P | 71 | 3.096  | -18.069 | -26.343 | 0.00 | 0.00 | PROA |
| 1117 | ATOM | 1117 | HG11 | VAL | P | 71 | 3.645  | -19.035 | -26.334 | 0.00 | 0.00 | PROA |
| 1118 | ATOM | 1118 | HG12 | VAL | P | 71 | 2.211  | -18.104 | -25.673 | 0.00 | 0.00 | PROA |
| 1119 | ATOM | 1119 | HG13 | VAL | P | 71 | 3.741  | -17.292 | -25.881 | 0.00 | 0.00 | PROA |
| 1120 | ATOM | 1120 | CG2  | VAL | P | 71 | 1.721  | -16.467 | -27.766 | 0.00 | 0.00 | PROA |
| 1121 | ATOM | 1121 | HG21 | VAL | P | 71 | 1.271  | -16.353 | -28.775 | 0.00 | 0.00 | PROA |
| 1122 | ATOM | 1122 | HG22 | VAL | P | 71 | 2.238  | -15.629 | -27.250 | 0.00 | 0.00 | PROA |
| 1123 | ATOM | 1123 | HG23 | VAL | P | 71 | 0.872  | -16.799 | -27.131 | 0.00 | 0.00 | PROA |
| 1124 | ATOM | 1124 | C    | VAL | P | 71 | 5.045  | -18.251 | -28.451 | 0.00 | 0.00 | PROA |
| 1125 | ATOM | 1125 | O    | VAL | P | 71 | 5.001  | -19.312 | -29.032 | 0.00 | 0.00 | PROA |
| 1126 | ATOM | 1126 | N    | LYS | P | 72 | 6.058  | -17.915 | -27.667 | 0.00 | 0.00 | PROA |
| 1127 | ATOM | 1127 | HN   | LYS | P | 72 | 6.213  | -17.007 | -27.285 | 0.00 | 0.00 | PROA |
| 1128 | ATOM | 1128 | CA   | LYS | P | 72 | 7.055  | -18.846 | -27.290 | 0.00 | 0.00 | PROA |
| 1129 | ATOM | 1129 | HA   | LYS | P | 72 | 6.698  | -19.858 | -27.408 | 0.00 | 0.00 | PROA |
| 1130 | ATOM | 1130 | CB   | LYS | P | 72 | 8.340  | -18.662 | -28.084 | 0.00 | 0.00 | PROA |
| 1131 | ATOM | 1131 | HB1  | LYS | P | 72 | 8.040  | -18.864 | -29.135 | 0.00 | 0.00 | PROA |
| 1132 | ATOM | 1132 | HB2  | LYS | P | 72 | 9.014  | -19.508 | -27.829 | 0.00 | 0.00 | PROA |
| 1133 | ATOM | 1133 | CG   | LYS | P | 72 | 9.113  | -17.307 | -28.070 | 0.00 | 0.00 | PROA |
| 1134 | ATOM | 1134 | HG1  | LYS | P | 72 | 9.363  | -16.905 | -27.065 | 0.00 | 0.00 | PROA |
| 1135 | ATOM | 1135 | HG2  | LYS | P | 72 | 8.469  | -16.558 | -28.578 | 0.00 | 0.00 | PROA |
| 1136 | ATOM | 1136 | CD   | LYS | P | 72 | 10.462 | -17.393 | -28.903 | 0.00 | 0.00 | PROA |
| 1137 | ATOM | 1137 | HD1  | LYS | P | 72 | 10.393 | -18.105 | -29.753 | 0.00 | 0.00 | PROA |
| 1138 | ATOM | 1138 | HD2  | LYS | P | 72 | 11.325 | -17.647 | -28.250 | 0.00 | 0.00 | PROA |
| 1139 | ATOM | 1139 | CE   | LYS | P | 72 | 10.844 | -15.989 | -29.389 | 0.00 | 0.00 | PROA |
| 1140 | ATOM | 1140 | HE1  | LYS | P | 72 | 10.655 | -15.391 | -28.472 | 0.00 | 0.00 | PROA |
| 1141 | ATOM | 1141 | HE2  | LYS | P | 72 | 10.218 | -15.587 | -30.214 | 0.00 | 0.00 | PROA |
| 1142 | ATOM | 1142 | NZ   | LYS | P | 72 | 12.225 | -15.919 | -29.918 | 0.00 | 0.00 | PROA |
| 1143 | ATOM | 1143 | HZ1  | LYS | P | 72 | 12.888 | -16.435 | -29.305 | 0.00 | 0.00 | PROA |
| 1144 | ATOM | 1144 | HZ2  | LYS | P | 72 | 12.482 | -14.911 | -29.931 | 0.00 | 0.00 | PROA |
| 1145 | ATOM | 1145 | HZ3  | LYS | P | 72 | 12.249 | -16.252 | -30.903 | 0.00 | 0.00 | PROA |
| 1146 | ATOM | 1146 | C    | LYS | P | 72 | 7.220  | -18.761 | -25.806 | 0.00 | 0.00 | PROA |
| 1147 | ATOM | 1147 | O    | LYS | P | 72 | 7.160  | -17.739 | -25.123 | 0.00 | 0.00 | PROA |
| 1148 | ATOM | 1148 | N    | VAL | P | 73 | 7.358  | -19.944 | -25.208 | 0.00 | 0.00 | PROA |
| 1149 | ATOM | 1149 | HN   | VAL | P | 73 | 7.356  | -20.768 | -25.769 | 0.00 | 0.00 | PROA |
| 1150 | ATOM | 1150 | CA   | VAL | P | 73 | 7.549  | -20.155 | -23.795 | 0.00 | 0.00 | PROA |
| 1151 | ATOM | 1151 | HA   | VAL | P | 73 | 7.375  | -19.232 | -23.262 | 0.00 | 0.00 | PROA |
| 1152 | ATOM | 1152 | CB   | VAL | P | 73 | 6.516  | -21.199 | -23.165 | 0.00 | 0.00 | PROA |
| 1153 | ATOM | 1153 | HB   | VAL | P | 73 | 6.562  | -22.240 | -23.551 | 0.00 | 0.00 | PROA |
| 1154 | ATOM | 1154 | CG1  | VAL | P | 73 | 6.826  | -21.130 | -21.595 | 0.00 | 0.00 | PROA |
| 1155 | ATOM | 1155 | HG11 | VAL | P | 73 | 7.832  | -21.503 | -21.309 | 0.00 | 0.00 | PROA |
| 1156 | ATOM | 1156 | HG12 | VAL | P | 73 | 6.098  | -21.777 | -21.058 | 0.00 | 0.00 | PROA |
| 1157 | ATOM | 1157 | HG13 | VAL | P | 73 | 6.843  | -20.063 | -21.287 | 0.00 | 0.00 | PROA |
| 1158 | ATOM | 1158 | CG2  | VAL | P | 73 | 5.091  | -20.823 | -23.440 | 0.00 | 0.00 | PROA |
| 1159 | ATOM | 1159 | HG21 | VAL | P | 73 | 4.461  | -21.643 | -23.034 | 0.00 | 0.00 | PROA |
| 1160 | ATOM | 1160 | HG22 | VAL | P | 73 | 4.942  | -20.606 | -24.519 | 0.00 | 0.00 | PROA |
| 1161 | ATOM | 1161 | HG23 | VAL | P | 73 | 4.845  | -19.894 | -22.881 | 0.00 | 0.00 | PROA |
| 1162 | ATOM | 1162 | C    | VAL | P | 73 | 8.993  | -20.576 | -23.732 | 0.00 | 0.00 | PROA |
| 1163 | ATOM | 1163 | O    | VAL | P | 73 | 9.448  | -21.670 | -24.142 | 0.00 | 0.00 | PROA |
| 1164 | ATOM | 1164 | N    | GLU | P | 74 | 9.730  | -19.816 | -22.967 | 0.00 | 0.00 | PROA |
| 1165 | ATOM | 1165 | HN   | GLU | P | 74 | 9.245  | -19.196 | -22.354 | 0.00 | 0.00 | PROA |
| 1166 | ATOM | 1166 | CA   | GLU | P | 74 | 11.142 | -20.006 | -22.649 | 0.00 | 0.00 | PROA |
| 1167 | ATOM | 1167 | HA   | GLU | P | 74 | 11.623 | -20.547 | -23.452 | 0.00 | 0.00 | PROA |
| 1168 | ATOM | 1168 | CB   | GLU | P | 74 | 11.883 | -18.666 | -22.475 | 0.00 | 0.00 | PROA |



|      |      |      |      |     |   |    |        |         |         |      |      |      |
|------|------|------|------|-----|---|----|--------|---------|---------|------|------|------|
| 1169 | ATOM | 1169 | HB1  | GLU | P | 74 | 11.293 | -18.166 | -21.677 | 0.00 | 0.00 | PROA |
| 1170 | ATOM | 1170 | HB2  | GLU | P | 74 | 11.714 | -17.997 | -23.345 | 0.00 | 0.00 | PROA |
| 1171 | ATOM | 1171 | CG   | GLU | P | 74 | 13.403 | -18.668 | -22.146 | 0.00 | 0.00 | PROA |
| 1172 | ATOM | 1172 | HG1  | GLU | P | 74 | 14.037 | -19.318 | -22.786 | 0.00 | 0.00 | PROA |
| 1173 | ATOM | 1173 | HG2  | GLU | P | 74 | 13.576 | -19.000 | -21.100 | 0.00 | 0.00 | PROA |
| 1174 | ATOM | 1174 | CD   | GLU | P | 74 | 13.983 | -17.245 | -22.185 | 0.00 | 0.00 | PROA |
| 1175 | ATOM | 1175 | OE1  | GLU | P | 74 | 14.795 | -16.881 | -23.043 | 0.00 | 0.00 | PROA |
| 1176 | ATOM | 1176 | OE2  | GLU | P | 74 | 13.454 | -16.531 | -21.306 | 0.00 | 0.00 | PROA |
| 1177 | ATOM | 1177 | C    | GLU | P | 74 | 11.283 | -20.715 | -21.251 | 0.00 | 0.00 | PROA |
| 1178 | ATOM | 1178 | O    | GLU | P | 74 | 11.096 | -20.158 | -20.207 | 0.00 | 0.00 | PROA |
| 1179 | ATOM | 1179 | N    | LEU | P | 75 | 11.697 | -22.026 | -21.249 | 0.00 | 0.00 | PROA |
| 1180 | ATOM | 1180 | HN   | LEU | P | 75 | 12.131 | -22.462 | -22.033 | 0.00 | 0.00 | PROA |
| 1181 | ATOM | 1181 | CA   | LEU | P | 75 | 11.806 | -22.739 | -20.020 | 0.00 | 0.00 | PROA |
| 1182 | ATOM | 1182 | HA   | LEU | P | 75 | 11.139 | -22.302 | -19.292 | 0.00 | 0.00 | PROA |
| 1183 | ATOM | 1183 | CB   | LEU | P | 75 | 11.565 | -24.257 | -20.213 | 0.00 | 0.00 | PROA |
| 1184 | ATOM | 1184 | HB1  | LEU | P | 75 | 11.395 | -24.814 | -19.267 | 0.00 | 0.00 | PROA |
| 1185 | ATOM | 1185 | HB2  | LEU | P | 75 | 12.362 | -24.779 | -20.785 | 0.00 | 0.00 | PROA |
| 1186 | ATOM | 1186 | CG   | LEU | P | 75 | 10.267 | -24.660 | -20.959 | 0.00 | 0.00 | PROA |
| 1187 | ATOM | 1187 | HG   | LEU | P | 75 | 10.165 | -24.115 | -21.922 | 0.00 | 0.00 | PROA |
| 1188 | ATOM | 1188 | CD1  | LEU | P | 75 | 10.170 | -26.201 | -21.181 | 0.00 | 0.00 | PROA |
| 1189 | ATOM | 1189 | HD11 | LEU | P | 75 | 9.770  | -26.737 | -20.293 | 0.00 | 0.00 | PROA |
| 1190 | ATOM | 1190 | HD12 | LEU | P | 75 | 11.165 | -26.517 | -21.562 | 0.00 | 0.00 | PROA |
| 1191 | ATOM | 1191 | HD13 | LEU | P | 75 | 9.393  | -26.430 | -21.941 | 0.00 | 0.00 | PROA |
| 1192 | ATOM | 1192 | CD2  | LEU | P | 75 | 9.059  | -24.111 | -20.161 | 0.00 | 0.00 | PROA |
| 1193 | ATOM | 1193 | HD21 | LEU | P | 75 | 8.162  | -24.190 | -20.812 | 0.00 | 0.00 | PROA |
| 1194 | ATOM | 1194 | HD22 | LEU | P | 75 | 9.093  | -23.012 | -20.000 | 0.00 | 0.00 | PROA |
| 1195 | ATOM | 1195 | HD23 | LEU | P | 75 | 8.833  | -24.624 | -19.202 | 0.00 | 0.00 | PROA |
| 1196 | ATOM | 1196 | C    | LEU | P | 75 | 13.218 | -22.603 | -19.419 | 0.00 | 0.00 | PROA |
| 1197 | ATOM | 1197 | O    | LEU | P | 75 | 14.156 | -22.219 | -20.094 | 0.00 | 0.00 | PROA |
| 1198 | ATOM | 1198 | N    | LYS | P | 76 | 13.275 | -22.867 | -18.117 | 0.00 | 0.00 | PROA |
| 1199 | ATOM | 1199 | HN   | LYS | P | 76 | 12.555 | -23.345 | -17.619 | 0.00 | 0.00 | PROA |
| 1200 | ATOM | 1200 | CA   | LYS | P | 76 | 14.479 | -22.605 | -17.358 | 0.00 | 0.00 | PROA |
| 1201 | ATOM | 1201 | HA   | LYS | P | 76 | 15.073 | -21.877 | -17.892 | 0.00 | 0.00 | PROA |
| 1202 | ATOM | 1202 | CB   | LYS | P | 76 | 14.036 | -22.051 | -15.956 | 0.00 | 0.00 | PROA |
| 1203 | ATOM | 1203 | HB1  | LYS | P | 76 | 14.975 | -22.067 | -15.363 | 0.00 | 0.00 | PROA |
| 1204 | ATOM | 1204 | HB2  | LYS | P | 76 | 13.317 | -22.811 | -15.580 | 0.00 | 0.00 | PROA |
| 1205 | ATOM | 1205 | CG   | LYS | P | 76 | 13.573 | -20.586 | -15.950 | 0.00 | 0.00 | PROA |
| 1206 | ATOM | 1206 | HG1  | LYS | P | 76 | 13.453 | -20.231 | -14.904 | 0.00 | 0.00 | PROA |
| 1207 | ATOM | 1207 | HG2  | LYS | P | 76 | 12.547 | -20.650 | -16.370 | 0.00 | 0.00 | PROA |
| 1208 | ATOM | 1208 | CD   | LYS | P | 76 | 14.317 | -19.602 | -16.871 | 0.00 | 0.00 | PROA |
| 1209 | ATOM | 1209 | HD1  | LYS | P | 76 | 13.720 | -18.670 | -16.773 | 0.00 | 0.00 | PROA |
| 1210 | ATOM | 1210 | HD2  | LYS | P | 76 | 14.095 | -19.955 | -17.901 | 0.00 | 0.00 | PROA |
| 1211 | ATOM | 1211 | CE   | LYS | P | 76 | 15.813 | -19.454 | -16.602 | 0.00 | 0.00 | PROA |
| 1212 | ATOM | 1212 | HE1  | LYS | P | 76 | 16.274 | -20.443 | -16.389 | 0.00 | 0.00 | PROA |
| 1213 | ATOM | 1213 | HE2  | LYS | P | 76 | 15.961 | -18.820 | -15.702 | 0.00 | 0.00 | PROA |
| 1214 | ATOM | 1214 | NZ   | LYS | P | 76 | 16.465 | -18.651 | -17.645 | 0.00 | 0.00 | PROA |
| 1215 | ATOM | 1215 | HZ1  | LYS | P | 76 | 16.668 | -19.192 | -18.509 | 0.00 | 0.00 | PROA |
| 1216 | ATOM | 1216 | HZ2  | LYS | P | 76 | 17.356 | -18.158 | -17.431 | 0.00 | 0.00 | PROA |
| 1217 | ATOM | 1217 | HZ3  | LYS | P | 76 | 15.865 | -17.953 | -18.130 | 0.00 | 0.00 | PROA |
| 1218 | ATOM | 1218 | C    | LYS | P | 76 | 15.445 | -23.801 | -17.240 | 0.00 | 0.00 | PROA |
| 1219 | ATOM | 1219 | O    | LYS | P | 76 | 16.677 | -23.684 | -17.112 | 0.00 | 0.00 | PROA |
| 1220 | ATOM | 1220 | N    | ASN | P | 77 | 14.811 | -25.028 | -17.408 | 0.00 | 0.00 | PROA |
| 1221 | ATOM | 1221 | HN   | ASN | P | 77 | 13.837 | -25.192 | -17.539 | 0.00 | 0.00 | PROA |
| 1222 | ATOM | 1222 | CA   | ASN | P | 77 | 15.472 | -26.242 | -17.810 | 0.00 | 0.00 | PROA |
| 1223 | ATOM | 1223 | HA   | ASN | P | 77 | 16.483 | -26.003 | -18.106 | 0.00 | 0.00 | PROA |
| 1224 | ATOM | 1224 | CB   | ASN | P | 77 | 15.390 | -27.293 | -16.694 | 0.00 | 0.00 | PROA |
| 1225 | ATOM | 1225 | HB1  | ASN | P | 77 | 14.323 | -27.532 | -16.496 | 0.00 | 0.00 | PROA |
| 1226 | ATOM | 1226 | HB2  | ASN | P | 77 | 15.834 | -26.876 | -15.766 | 0.00 | 0.00 | PROA |
| 1227 | ATOM | 1227 | CG   | ASN | P | 77 | 16.258 | -28.501 | -16.913 | 0.00 | 0.00 | PROA |
| 1228 | ATOM | 1228 | OD1  | ASN | P | 77 | 17.203 | -28.460 | -17.735 | 0.00 | 0.00 | PROA |
| 1229 | ATOM | 1229 | ND2  | ASN | P | 77 | 16.037 | -29.584 | -16.163 | 0.00 | 0.00 | PROA |
| 1230 | ATOM | 1230 | HD21 | ASN | P | 77 | 16.727 | -30.307 | -16.113 | 0.00 | 0.00 | PROA |
| 1231 | ATOM | 1231 | HD22 | ASN | P | 77 | 15.383 | -29.622 | -15.407 | 0.00 | 0.00 | PROA |
| 1232 | ATOM | 1232 | C    | ASN | P | 77 | 14.661 | -26.744 | -19.023 | 0.00 | 0.00 | PROA |
| 1233 | ATOM | 1233 | O    | ASN | P | 77 | 13.443 | -26.600 | -19.123 | 0.00 | 0.00 | PROA |
| 1234 | ATOM | 1234 | N    | GLY | P | 78 | 15.290 | -27.266 | -20.067 | 0.00 | 0.00 | PROA |
| 1235 | ATOM | 1235 | HN   | GLY | P | 78 | 16.286 | -27.284 | -20.089 | 0.00 | 0.00 | PROA |
| 1236 | ATOM | 1236 | CA   | GLY | P | 78 | 14.665 | -27.633 | -21.262 | 0.00 | 0.00 | PROA |
| 1237 | ATOM | 1237 | HA1  | GLY | P | 78 | 13.628 | -27.934 | -21.237 | 0.00 | 0.00 | PROA |
| 1238 | ATOM | 1238 | HA2  | GLY | P | 78 | 15.186 | -28.525 | -21.575 | 0.00 | 0.00 | PROA |
| 1239 | ATOM | 1239 | C    | GLY | P | 78 | 14.771 | -26.476 | -22.278 | 0.00 | 0.00 | PROA |
| 1240 | ATOM | 1240 | O    | GLY | P | 78 | 15.265 | -25.398 | -21.936 | 0.00 | 0.00 | PROA |
| 1241 | ATOM | 1241 | N    | ALA | P | 79 | 14.352 | -26.717 | -23.517 | 0.00 | 0.00 | PROA |

|      |      |      |      |     |   |    |        |         |         |      |      |      |
|------|------|------|------|-----|---|----|--------|---------|---------|------|------|------|
| 1242 | ATOM | 1242 | HN   | ALA | P | 79 | 13.996 | -27.623 | -23.731 | 0.00 | 0.00 | PROA |
| 1243 | ATOM | 1243 | CA   | ALA | P | 79 | 14.442 | -25.777 | -24.577 | 0.00 | 0.00 | PROA |
| 1244 | ATOM | 1244 | HA   | ALA | P | 79 | 15.479 | -25.475 | -24.594 | 0.00 | 0.00 | PROA |
| 1245 | ATOM | 1245 | CB   | ALA | P | 79 | 14.264 | -26.637 | -25.777 | 0.00 | 0.00 | PROA |
| 1246 | ATOM | 1246 | HB1  | ALA | P | 79 | 15.076 | -27.396 | -25.813 | 0.00 | 0.00 | PROA |
| 1247 | ATOM | 1247 | HB2  | ALA | P | 79 | 14.210 | -25.976 | -26.668 | 0.00 | 0.00 | PROA |
| 1248 | ATOM | 1248 | HB3  | ALA | P | 79 | 13.270 | -27.132 | -25.748 | 0.00 | 0.00 | PROA |
| 1249 | ATOM | 1249 | C    | ALA | P | 79 | 13.619 | -24.511 | -24.529 | 0.00 | 0.00 | PROA |
| 1250 | ATOM | 1250 | O    | ALA | P | 79 | 12.841 | -24.360 | -23.589 | 0.00 | 0.00 | PROA |
| 1251 | ATOM | 1251 | N    | THR | P | 80 | 13.735 | -23.526 | -25.404 | 0.00 | 0.00 | PROA |
| 1252 | ATOM | 1252 | HN   | THR | P | 80 | 14.494 | -23.556 | -26.049 | 0.00 | 0.00 | PROA |
| 1253 | ATOM | 1253 | CA   | THR | P | 80 | 12.717 | -22.520 | -25.562 | 0.00 | 0.00 | PROA |
| 1254 | ATOM | 1254 | HA   | THR | P | 80 | 12.152 | -22.430 | -24.646 | 0.00 | 0.00 | PROA |
| 1255 | ATOM | 1255 | CB   | THR | P | 80 | 13.254 | -21.131 | -26.056 | 0.00 | 0.00 | PROA |
| 1256 | ATOM | 1256 | HB   | THR | P | 80 | 14.039 | -21.129 | -26.842 | 0.00 | 0.00 | PROA |
| 1257 | ATOM | 1257 | OG1  | THR | P | 80 | 13.981 | -20.564 | -24.934 | 0.00 | 0.00 | PROA |
| 1258 | ATOM | 1258 | HG1  | THR | P | 80 | 14.105 | -21.260 | -24.283 | 0.00 | 0.00 | PROA |
| 1259 | ATOM | 1259 | CG2  | THR | P | 80 | 12.156 | -20.111 | -26.317 | 0.00 | 0.00 | PROA |
| 1260 | ATOM | 1260 | HG21 | THR | P | 80 | 11.544 | -19.919 | -25.411 | 0.00 | 0.00 | PROA |
| 1261 | ATOM | 1261 | HG22 | THR | P | 80 | 11.379 | -20.438 | -27.041 | 0.00 | 0.00 | PROA |
| 1262 | ATOM | 1262 | HG23 | THR | P | 80 | 12.564 | -19.097 | -26.513 | 0.00 | 0.00 | PROA |
| 1263 | ATOM | 1263 | C    | THR | P | 80 | 11.828 | -23.039 | -26.625 | 0.00 | 0.00 | PROA |
| 1264 | ATOM | 1264 | O    | THR | P | 80 | 12.239 | -23.579 | -27.628 | 0.00 | 0.00 | PROA |
| 1265 | ATOM | 1265 | N    | TYR | P | 81 | 10.479 | -22.981 | -26.401 | 0.00 | 0.00 | PROA |
| 1266 | ATOM | 1266 | HN   | TYR | P | 81 | 10.122 | -22.317 | -25.749 | 0.00 | 0.00 | PROA |
| 1267 | ATOM | 1267 | CA   | TYR | P | 81 | 9.460  | -23.714 | -27.115 | 0.00 | 0.00 | PROA |
| 1268 | ATOM | 1268 | HA   | TYR | P | 81 | 9.814  | -24.281 | -27.964 | 0.00 | 0.00 | PROA |
| 1269 | ATOM | 1269 | CB   | TYR | P | 81 | 8.504  | -24.484 | -26.134 | 0.00 | 0.00 | PROA |
| 1270 | ATOM | 1270 | HB1  | TYR | P | 81 | 7.516  | -24.758 | -26.562 | 0.00 | 0.00 | PROA |
| 1271 | ATOM | 1271 | HB2  | TYR | P | 81 | 8.497  | -23.944 | -25.163 | 0.00 | 0.00 | PROA |
| 1272 | ATOM | 1272 | CG   | TYR | P | 81 | 9.288  | -25.799 | -25.943 | 0.00 | 0.00 | PROA |
| 1273 | ATOM | 1273 | CD1  | TYR | P | 81 | 10.121 | -25.782 | -24.842 | 0.00 | 0.00 | PROA |
| 1274 | ATOM | 1274 | HD1  | TYR | P | 81 | 10.180 | -24.902 | -24.220 | 0.00 | 0.00 | PROA |
| 1275 | ATOM | 1275 | CE1  | TYR | P | 81 | 10.955 | -26.953 | -24.612 | 0.00 | 0.00 | PROA |
| 1276 | ATOM | 1276 | HE1  | TYR | P | 81 | 11.536 | -26.954 | -23.701 | 0.00 | 0.00 | PROA |
| 1277 | ATOM | 1277 | CZ   | TYR | P | 81 | 10.852 | -28.035 | -25.440 | 0.00 | 0.00 | PROA |
| 1278 | ATOM | 1278 | OH   | TYR | P | 81 | 11.726 | -29.088 | -25.170 | 0.00 | 0.00 | PROA |
| 1279 | ATOM | 1279 | HH   | TYR | P | 81 | 11.373 | -29.737 | -25.784 | 0.00 | 0.00 | PROA |
| 1280 | ATOM | 1280 | CD2  | TYR | P | 81 | 9.280  | -26.823 | -26.873 | 0.00 | 0.00 | PROA |
| 1281 | ATOM | 1281 | HD2  | TYR | P | 81 | 8.704  | -26.544 | -27.743 | 0.00 | 0.00 | PROA |
| 1282 | ATOM | 1282 | CE2  | TYR | P | 81 | 10.069 | -27.991 | -26.634 | 0.00 | 0.00 | PROA |
| 1283 | ATOM | 1283 | HE2  | TYR | P | 81 | 10.166 | -28.794 | -27.350 | 0.00 | 0.00 | PROA |
| 1284 | ATOM | 1284 | C    | TYR | P | 81 | 8.442  | -22.727 | -27.665 | 0.00 | 0.00 | PROA |
| 1285 | ATOM | 1285 | O    | TYR | P | 81 | 7.732  | -22.132 | -26.882 | 0.00 | 0.00 | PROA |
| 1286 | ATOM | 1286 | N    | GLU | P | 82 | 8.279  | -22.682 | -29.009 | 0.00 | 0.00 | PROA |
| 1287 | ATOM | 1287 | HN   | GLU | P | 82 | 8.857  | -23.239 | -29.600 | 0.00 | 0.00 | PROA |
| 1288 | ATOM | 1288 | CA   | GLU | P | 82 | 7.192  | -22.030 | -29.650 | 0.00 | 0.00 | PROA |
| 1289 | ATOM | 1289 | HA   | GLU | P | 82 | 7.078  | -21.040 | -29.233 | 0.00 | 0.00 | PROA |
| 1290 | ATOM | 1290 | CB   | GLU | P | 82 | 7.360  | -21.805 | -31.163 | 0.00 | 0.00 | PROA |
| 1291 | ATOM | 1291 | HB1  | GLU | P | 82 | 6.350  | -21.720 | -31.619 | 0.00 | 0.00 | PROA |
| 1292 | ATOM | 1292 | HB2  | GLU | P | 82 | 7.746  | -22.724 | -31.653 | 0.00 | 0.00 | PROA |
| 1293 | ATOM | 1293 | CG   | GLU | P | 82 | 8.179  | -20.504 | -31.542 | 0.00 | 0.00 | PROA |
| 1294 | ATOM | 1294 | HG1  | GLU | P | 82 | 9.178  | -20.667 | -31.083 | 0.00 | 0.00 | PROA |
| 1295 | ATOM | 1295 | HG2  | GLU | P | 82 | 7.748  | -19.570 | -31.123 | 0.00 | 0.00 | PROA |
| 1296 | ATOM | 1296 | CD   | GLU | P | 82 | 8.306  | -20.335 | -33.010 | 0.00 | 0.00 | PROA |
| 1297 | ATOM | 1297 | OE1  | GLU | P | 82 | 9.424  | -20.108 | -33.521 | 0.00 | 0.00 | PROA |
| 1298 | ATOM | 1298 | OE2  | GLU | P | 82 | 7.251  | -20.383 | -33.734 | 0.00 | 0.00 | PROA |
| 1299 | ATOM | 1299 | C    | GLU | P | 82 | 5.896  | -22.729 | -29.370 | 0.00 | 0.00 | PROA |
| 1300 | ATOM | 1300 | O    | GLU | P | 82 | 5.825  | -23.983 | -29.423 | 0.00 | 0.00 | PROA |
| 1301 | ATOM | 1301 | N    | ALA | P | 83 | 4.807  | -22.051 | -28.984 | 0.00 | 0.00 | PROA |
| 1302 | ATOM | 1302 | HN   | ALA | P | 83 | 4.817  | -21.054 | -29.016 | 0.00 | 0.00 | PROA |
| 1303 | ATOM | 1303 | CA   | ALA | P | 83 | 3.647  | -22.671 | -28.420 | 0.00 | 0.00 | PROA |
| 1304 | ATOM | 1304 | HA   | ALA | P | 83 | 3.751  | -23.741 | -28.523 | 0.00 | 0.00 | PROA |
| 1305 | ATOM | 1305 | CB   | ALA | P | 83 | 3.591  | -22.366 | -26.906 | 0.00 | 0.00 | PROA |
| 1306 | ATOM | 1306 | HB1  | ALA | P | 83 | 2.711  | -22.812 | -26.395 | 0.00 | 0.00 | PROA |
| 1307 | ATOM | 1307 | HB2  | ALA | P | 83 | 3.642  | -21.271 | -26.726 | 0.00 | 0.00 | PROA |
| 1308 | ATOM | 1308 | HB3  | ALA | P | 83 | 4.547  | -22.711 | -26.458 | 0.00 | 0.00 | PROA |
| 1309 | ATOM | 1309 | C    | ALA | P | 83 | 2.287  | -22.288 | -28.931 | 0.00 | 0.00 | PROA |
| 1310 | ATOM | 1310 | O    | ALA | P | 83 | 2.098  | -21.277 | -29.568 | 0.00 | 0.00 | PROA |
| 1311 | ATOM | 1311 | N    | LYS | P | 84 | 1.211  | -23.066 | -28.550 | 0.00 | 0.00 | PROA |
| 1312 | ATOM | 1312 | HN   | LYS | P | 84 | 1.343  | -23.724 | -27.813 | 0.00 | 0.00 | PROA |
| 1313 | ATOM | 1313 | CA   | LYS | P | 84 | -0.183 | -22.725 | -28.810 | 0.00 | 0.00 | PROA |
| 1314 | ATOM | 1314 | HA   | LYS | P | 84 | -0.293 | -22.217 | -29.757 | 0.00 | 0.00 | PROA |

|      |      |      |      |     |   |    |         |         |         |      |      |      |
|------|------|------|------|-----|---|----|---------|---------|---------|------|------|------|
| 1315 | ATOM | 1315 | CB   | LYS | P | 84 | -0.942  | -24.004 | -29.252 | 0.00 | 0.00 | PROA |
| 1316 | ATOM | 1316 | HB1  | LYS | P | 84 | -0.608  | -24.721 | -28.473 | 0.00 | 0.00 | PROA |
| 1317 | ATOM | 1317 | HB2  | LYS | P | 84 | -0.563  | -24.345 | -30.239 | 0.00 | 0.00 | PROA |
| 1318 | ATOM | 1318 | CG   | LYS | P | 84 | -2.471  | -23.992 | -29.451 | 0.00 | 0.00 | PROA |
| 1319 | ATOM | 1319 | HG1  | LYS | P | 84 | -2.850  | -23.687 | -28.452 | 0.00 | 0.00 | PROA |
| 1320 | ATOM | 1320 | HG2  | LYS | P | 84 | -2.959  | -24.964 | -29.678 | 0.00 | 0.00 | PROA |
| 1321 | ATOM | 1321 | CD   | LYS | P | 84 | -2.871  | -22.992 | -30.529 | 0.00 | 0.00 | PROA |
| 1322 | ATOM | 1322 | HD1  | LYS | P | 84 | -2.282  | -23.135 | -31.460 | 0.00 | 0.00 | PROA |
| 1323 | ATOM | 1323 | HD2  | LYS | P | 84 | -2.782  | -21.941 | -30.182 | 0.00 | 0.00 | PROA |
| 1324 | ATOM | 1324 | CE   | LYS | P | 84 | -4.332  | -23.289 | -31.090 | 0.00 | 0.00 | PROA |
| 1325 | ATOM | 1325 | HE1  | LYS | P | 84 | -4.469  | -24.216 | -31.688 | 0.00 | 0.00 | PROA |
| 1326 | ATOM | 1326 | HE2  | LYS | P | 84 | -4.524  | -22.514 | -31.862 | 0.00 | 0.00 | PROA |
| 1327 | ATOM | 1327 | NZ   | LYS | P | 84 | -5.296  | -23.206 | -30.013 | 0.00 | 0.00 | PROA |
| 1328 | ATOM | 1328 | HZ1  | LYS | P | 84 | -4.968  | -22.708 | -29.161 | 0.00 | 0.00 | PROA |
| 1329 | ATOM | 1329 | HZ2  | LYS | P | 84 | -5.456  | -24.207 | -29.779 | 0.00 | 0.00 | PROA |
| 1330 | ATOM | 1330 | HZ3  | LYS | P | 84 | -6.130  | -22.677 | -30.338 | 0.00 | 0.00 | PROA |
| 1331 | ATOM | 1331 | C    | LYS | P | 84 | -0.889  | -22.139 | -27.566 | 0.00 | 0.00 | PROA |
| 1332 | ATOM | 1332 | O    | LYS | P | 84 | -0.786  | -22.699 | -26.441 | 0.00 | 0.00 | PROA |
| 1333 | ATOM | 1333 | N    | ILE | P | 85 | -1.599  | -21.001 | -27.760 | 0.00 | 0.00 | PROA |
| 1334 | ATOM | 1334 | HN   | ILE | P | 85 | -1.462  | -20.521 | -28.623 | 0.00 | 0.00 | PROA |
| 1335 | ATOM | 1335 | CA   | ILE | P | 85 | -2.663  | -20.470 | -26.895 | 0.00 | 0.00 | PROA |
| 1336 | ATOM | 1336 | HA   | ILE | P | 85 | -2.306  | -20.414 | -25.878 | 0.00 | 0.00 | PROA |
| 1337 | ATOM | 1337 | CB   | ILE | P | 85 | -3.159  | -19.045 | -27.312 | 0.00 | 0.00 | PROA |
| 1338 | ATOM | 1338 | HB   | ILE | P | 85 | -3.732  | -19.136 | -28.260 | 0.00 | 0.00 | PROA |
| 1339 | ATOM | 1339 | CG2  | ILE | P | 85 | -4.039  | -18.485 | -26.194 | 0.00 | 0.00 | PROA |
| 1340 | ATOM | 1340 | HG21 | ILE | P | 85 | -5.037  | -18.954 | -26.057 | 0.00 | 0.00 | PROA |
| 1341 | ATOM | 1341 | HG22 | ILE | P | 85 | -4.209  | -17.387 | -26.227 | 0.00 | 0.00 | PROA |
| 1342 | ATOM | 1342 | HG23 | ILE | P | 85 | -3.527  | -18.632 | -25.219 | 0.00 | 0.00 | PROA |
| 1343 | ATOM | 1343 | CG1  | ILE | P | 85 | -1.951  | -18.083 | -27.414 | 0.00 | 0.00 | PROA |
| 1344 | ATOM | 1344 | HG11 | ILE | P | 85 | -1.099  | -18.491 | -27.998 | 0.00 | 0.00 | PROA |
| 1345 | ATOM | 1345 | HG12 | ILE | P | 85 | -1.548  | -18.012 | -26.381 | 0.00 | 0.00 | PROA |
| 1346 | ATOM | 1346 | CD   | ILE | P | 85 | -2.226  | -16.662 | -28.016 | 0.00 | 0.00 | PROA |
| 1347 | ATOM | 1347 | HD1  | ILE | P | 85 | -2.876  | -16.709 | -28.916 | 0.00 | 0.00 | PROA |
| 1348 | ATOM | 1348 | HD2  | ILE | P | 85 | -1.297  | -16.175 | -28.383 | 0.00 | 0.00 | PROA |
| 1349 | ATOM | 1349 | HD3  | ILE | P | 85 | -2.699  | -16.000 | -27.260 | 0.00 | 0.00 | PROA |
| 1350 | ATOM | 1350 | C    | ILE | P | 85 | -3.888  | -21.394 | -26.842 | 0.00 | 0.00 | PROA |
| 1351 | ATOM | 1351 | O    | ILE | P | 85 | -4.374  | -21.797 | -27.856 | 0.00 | 0.00 | PROA |
| 1352 | ATOM | 1352 | N    | LYS | P | 86 | -4.357  | -21.612 | -25.605 | 0.00 | 0.00 | PROA |
| 1353 | ATOM | 1353 | HN   | LYS | P | 86 | -3.818  | -21.214 | -24.868 | 0.00 | 0.00 | PROA |
| 1354 | ATOM | 1354 | CA   | LYS | P | 86 | -5.446  | -22.516 | -25.281 | 0.00 | 0.00 | PROA |
| 1355 | ATOM | 1355 | HA   | LYS | P | 86 | -5.755  | -22.993 | -26.199 | 0.00 | 0.00 | PROA |
| 1356 | ATOM | 1356 | CB   | LYS | P | 86 | -4.964  | -23.544 | -24.120 | 0.00 | 0.00 | PROA |
| 1357 | ATOM | 1357 | HB1  | LYS | P | 86 | -5.806  | -24.200 | -23.810 | 0.00 | 0.00 | PROA |
| 1358 | ATOM | 1358 | HB2  | LYS | P | 86 | -4.819  | -22.855 | -23.260 | 0.00 | 0.00 | PROA |
| 1359 | ATOM | 1359 | CG   | LYS | P | 86 | -3.728  | -24.428 | -24.358 | 0.00 | 0.00 | PROA |
| 1360 | ATOM | 1360 | HG1  | LYS | P | 86 | -3.673  | -24.986 | -23.399 | 0.00 | 0.00 | PROA |
| 1361 | ATOM | 1361 | HG2  | LYS | P | 86 | -2.850  | -23.795 | -24.608 | 0.00 | 0.00 | PROA |
| 1362 | ATOM | 1362 | CD   | LYS | P | 86 | -4.048  | -25.398 | -25.509 | 0.00 | 0.00 | PROA |
| 1363 | ATOM | 1363 | HD1  | LYS | P | 86 | -3.144  | -25.878 | -25.938 | 0.00 | 0.00 | PROA |
| 1364 | ATOM | 1364 | HD2  | LYS | P | 86 | -4.410  | -24.863 | -26.413 | 0.00 | 0.00 | PROA |
| 1365 | ATOM | 1365 | CE   | LYS | P | 86 | -4.934  | -26.617 | -25.062 | 0.00 | 0.00 | PROA |
| 1366 | ATOM | 1366 | HE1  | LYS | P | 86 | -5.952  | -26.286 | -24.763 | 0.00 | 0.00 | PROA |
| 1367 | ATOM | 1367 | HE2  | LYS | P | 86 | -4.527  | -27.114 | -24.156 | 0.00 | 0.00 | PROA |
| 1368 | ATOM | 1368 | NZ   | LYS | P | 86 | -5.331  | -27.585 | -26.033 | 0.00 | 0.00 | PROA |
| 1369 | ATOM | 1369 | HZ1  | LYS | P | 86 | -4.551  | -28.082 | -26.509 | 0.00 | 0.00 | PROA |
| 1370 | ATOM | 1370 | HZ2  | LYS | P | 86 | -5.882  | -27.210 | -26.831 | 0.00 | 0.00 | PROA |
| 1371 | ATOM | 1371 | HZ3  | LYS | P | 86 | -5.908  | -28.280 | -25.518 | 0.00 | 0.00 | PROA |
| 1372 | ATOM | 1372 | C    | LYS | P | 86 | -6.526  | -21.562 | -24.748 | 0.00 | 0.00 | PROA |
| 1373 | ATOM | 1373 | O    | LYS | P | 86 | -6.609  | -20.429 | -25.324 | 0.00 | 0.00 | PROA |
| 1374 | ATOM | 1374 | N    | ASP | P | 87 | -7.362  | -21.949 | -23.692 | 0.00 | 0.00 | PROA |
| 1375 | ATOM | 1375 | HN   | ASP | P | 87 | -7.146  | -22.896 | -23.466 | 0.00 | 0.00 | PROA |
| 1376 | ATOM | 1376 | CA   | ASP | P | 87 | -8.409  | -21.144 | -23.117 | 0.00 | 0.00 | PROA |
| 1377 | ATOM | 1377 | HA   | ASP | P | 87 | -9.154  | -20.972 | -23.880 | 0.00 | 0.00 | PROA |
| 1378 | ATOM | 1378 | CB   | ASP | P | 87 | -9.420  | -21.910 | -22.222 | 0.00 | 0.00 | PROA |
| 1379 | ATOM | 1379 | HB1  | ASP | P | 87 | -10.294 | -21.334 | -21.849 | 0.00 | 0.00 | PROA |
| 1380 | ATOM | 1380 | HB2  | ASP | P | 87 | -8.822  | -22.359 | -21.400 | 0.00 | 0.00 | PROA |
| 1381 | ATOM | 1381 | CG   | ASP | P | 87 | -9.917  | -23.106 | -23.024 | 0.00 | 0.00 | PROA |
| 1382 | ATOM | 1382 | OD1  | ASP | P | 87 | -10.147 | -24.159 | -22.441 | 0.00 | 0.00 | PROA |
| 1383 | ATOM | 1383 | OD2  | ASP | P | 87 | -10.091 | -22.973 | -24.261 | 0.00 | 0.00 | PROA |
| 1384 | ATOM | 1384 | C    | ASP | P | 87 | -7.946  | -19.842 | -22.441 | 0.00 | 0.00 | PROA |
| 1385 | ATOM | 1385 | O    | ASP | P | 87 | -6.848  | -19.896 | -21.928 | 0.00 | 0.00 | PROA |
| 1386 | ATOM | 1386 | N    | VAL | P | 88 | -8.749  | -18.807 | -22.419 | 0.00 | 0.00 | PROA |
| 1387 | ATOM | 1387 | HN   | VAL | P | 88 | -9.619  | -18.985 | -22.872 | 0.00 | 0.00 | PROA |

|      |      |      |      |     |   |    |         |         |         |      |      |      |
|------|------|------|------|-----|---|----|---------|---------|---------|------|------|------|
| 1388 | ATOM | 1388 | CA   | VAL | P | 88 | -8.486  | -17.461 | -21.883 | 0.00 | 0.00 | PROA |
| 1389 | ATOM | 1389 | HA   | VAL | P | 88 | -7.598  | -17.424 | -21.268 | 0.00 | 0.00 | PROA |
| 1390 | ATOM | 1390 | CB   | VAL | P | 88 | -8.295  | -16.410 | -23.033 | 0.00 | 0.00 | PROA |
| 1391 | ATOM | 1391 | HB   | VAL | P | 88 | -9.270  | -16.127 | -23.484 | 0.00 | 0.00 | PROA |
| 1392 | ATOM | 1392 | CG1  | VAL | P | 88 | -7.746  | -15.029 | -22.481 | 0.00 | 0.00 | PROA |
| 1393 | ATOM | 1393 | HG11 | VAL | P | 88 | -8.618  | -14.402 | -22.197 | 0.00 | 0.00 | PROA |
| 1394 | ATOM | 1394 | HG12 | VAL | P | 88 | -7.123  | -14.498 | -23.232 | 0.00 | 0.00 | PROA |
| 1395 | ATOM | 1395 | HG13 | VAL | P | 88 | -7.152  | -15.094 | -21.544 | 0.00 | 0.00 | PROA |
| 1396 | ATOM | 1396 | CG2  | VAL | P | 88 | -7.201  | -16.926 | -23.944 | 0.00 | 0.00 | PROA |
| 1397 | ATOM | 1397 | HG21 | VAL | P | 88 | -7.477  | -17.831 | -24.527 | 0.00 | 0.00 | PROA |
| 1398 | ATOM | 1398 | HG22 | VAL | P | 88 | -6.321  | -17.132 | -23.298 | 0.00 | 0.00 | PROA |
| 1399 | ATOM | 1399 | HG23 | VAL | P | 88 | -6.833  | -16.238 | -24.735 | 0.00 | 0.00 | PROA |
| 1400 | ATOM | 1400 | C    | VAL | P | 88 | -9.763  | -17.062 | -21.139 | 0.00 | 0.00 | PROA |
| 1401 | ATOM | 1401 | O    | VAL | P | 88 | -10.904 | -17.332 | -21.606 | 0.00 | 0.00 | PROA |
| 1402 | ATOM | 1402 | N    | ASP | P | 89 | -9.574  | -16.327 | -20.023 | 0.00 | 0.00 | PROA |
| 1403 | ATOM | 1403 | HN   | ASP | P | 89 | -8.732  | -16.315 | -19.489 | 0.00 | 0.00 | PROA |
| 1404 | ATOM | 1404 | CA   | ASP | P | 89 | -10.755 | -15.865 | -19.264 | 0.00 | 0.00 | PROA |
| 1405 | ATOM | 1405 | HA   | ASP | P | 89 | -11.489 | -15.645 | -20.026 | 0.00 | 0.00 | PROA |
| 1406 | ATOM | 1406 | CB   | ASP | P | 89 | -11.232 | -16.854 | -18.109 | 0.00 | 0.00 | PROA |
| 1407 | ATOM | 1407 | HB1  | ASP | P | 89 | -10.569 | -16.805 | -17.219 | 0.00 | 0.00 | PROA |
| 1408 | ATOM | 1408 | HB2  | ASP | P | 89 | -11.168 | -17.910 | -18.449 | 0.00 | 0.00 | PROA |
| 1409 | ATOM | 1409 | CG   | ASP | P | 89 | -12.656 | -16.448 | -17.673 | 0.00 | 0.00 | PROA |
| 1410 | ATOM | 1410 | OD1  | ASP | P | 89 | -12.948 | -16.581 | -16.481 | 0.00 | 0.00 | PROA |
| 1411 | ATOM | 1411 | OD2  | ASP | P | 89 | -13.484 | -16.020 | -18.520 | 0.00 | 0.00 | PROA |
| 1412 | ATOM | 1412 | C    | ASP | P | 89 | -10.408 | -14.541 | -18.894 | 0.00 | 0.00 | PROA |
| 1413 | ATOM | 1413 | O    | ASP | P | 89 | -9.682  | -14.333 | -17.904 | 0.00 | 0.00 | PROA |
| 1414 | ATOM | 1414 | N    | GLU | P | 90 | -10.833 | -13.450 | -19.594 | 0.00 | 0.00 | PROA |
| 1415 | ATOM | 1415 | HN   | GLU | P | 90 | -11.424 | -13.589 | -20.385 | 0.00 | 0.00 | PROA |
| 1416 | ATOM | 1416 | CA   | GLU | P | 90 | -10.527 | -12.091 | -19.153 | 0.00 | 0.00 | PROA |
| 1417 | ATOM | 1417 | HA   | GLU | P | 90 | -9.448  | -12.067 | -19.180 | 0.00 | 0.00 | PROA |
| 1418 | ATOM | 1418 | CB   | GLU | P | 90 | -10.954 | -11.129 | -20.247 | 0.00 | 0.00 | PROA |
| 1419 | ATOM | 1419 | HB1  | GLU | P | 90 | -10.929 | -10.053 | -19.972 | 0.00 | 0.00 | PROA |
| 1420 | ATOM | 1420 | HB2  | GLU | P | 90 | -11.960 | -11.511 | -20.521 | 0.00 | 0.00 | PROA |
| 1421 | ATOM | 1421 | CG   | GLU | P | 90 | -9.931  | -11.233 | -21.441 | 0.00 | 0.00 | PROA |
| 1422 | ATOM | 1422 | HG1  | GLU | P | 90 | -10.363 | -12.062 | -22.041 | 0.00 | 0.00 | PROA |
| 1423 | ATOM | 1423 | HG2  | GLU | P | 90 | -8.891  | -11.509 | -21.164 | 0.00 | 0.00 | PROA |
| 1424 | ATOM | 1424 | CD   | GLU | P | 90 | -9.725  | -9.882  | -22.194 | 0.00 | 0.00 | PROA |
| 1425 | ATOM | 1425 | OE1  | GLU | P | 90 | -8.600  | -9.347  | -22.299 | 0.00 | 0.00 | PROA |
| 1426 | ATOM | 1426 | OE2  | GLU | P | 90 | -10.718 | -9.417  | -22.821 | 0.00 | 0.00 | PROA |
| 1427 | ATOM | 1427 | C    | GLU | P | 90 | -11.139 | -11.615 | -17.883 | 0.00 | 0.00 | PROA |
| 1428 | ATOM | 1428 | O    | GLU | P | 90 | -10.513 | -10.836 | -17.241 | 0.00 | 0.00 | PROA |
| 1429 | ATOM | 1429 | N    | LYS | P | 91 | -12.303 | -12.113 | -17.443 | 0.00 | 0.00 | PROA |
| 1430 | ATOM | 1430 | HN   | LYS | P | 91 | -12.859 | -12.669 | -18.056 | 0.00 | 0.00 | PROA |
| 1431 | ATOM | 1431 | CA   | LYS | P | 91 | -12.854 | -11.698 | -16.207 | 0.00 | 0.00 | PROA |
| 1432 | ATOM | 1432 | HA   | LYS | P | 91 | -12.771 | -10.622 | -16.169 | 0.00 | 0.00 | PROA |
| 1433 | ATOM | 1433 | CB   | LYS | P | 91 | -14.336 | -12.138 | -16.112 | 0.00 | 0.00 | PROA |
| 1434 | ATOM | 1434 | HB1  | LYS | P | 91 | -14.927 | -11.521 | -16.823 | 0.00 | 0.00 | PROA |
| 1435 | ATOM | 1435 | HB2  | LYS | P | 91 | -14.700 | -11.910 | -15.088 | 0.00 | 0.00 | PROA |
| 1436 | ATOM | 1436 | CG   | LYS | P | 91 | -14.592 | -13.654 | -16.295 | 0.00 | 0.00 | PROA |
| 1437 | ATOM | 1437 | HG1  | LYS | P | 91 | -14.004 | -14.284 | -15.593 | 0.00 | 0.00 | PROA |
| 1438 | ATOM | 1438 | HG2  | LYS | P | 91 | -14.188 | -13.820 | -17.316 | 0.00 | 0.00 | PROA |
| 1439 | ATOM | 1439 | CD   | LYS | P | 91 | -16.085 | -13.989 | -16.302 | 0.00 | 0.00 | PROA |
| 1440 | ATOM | 1440 | HD1  | LYS | P | 91 | -16.650 | -13.310 | -16.976 | 0.00 | 0.00 | PROA |
| 1441 | ATOM | 1441 | HD2  | LYS | P | 91 | -16.622 | -13.843 | -15.340 | 0.00 | 0.00 | PROA |
| 1442 | ATOM | 1442 | CE   | LYS | P | 91 | -16.345 | -15.388 | -16.895 | 0.00 | 0.00 | PROA |
| 1443 | ATOM | 1443 | HE1  | LYS | P | 91 | -15.903 | -15.448 | -17.913 | 0.00 | 0.00 | PROA |
| 1444 | ATOM | 1444 | HE2  | LYS | P | 91 | -17.427 | -15.639 | -16.910 | 0.00 | 0.00 | PROA |
| 1445 | ATOM | 1445 | NZ   | LYS | P | 91 | -15.632 | -16.299 | -16.000 | 0.00 | 0.00 | PROA |
| 1446 | ATOM | 1446 | HZ1  | LYS | P | 91 | -15.942 | -17.279 | -16.159 | 0.00 | 0.00 | PROA |
| 1447 | ATOM | 1447 | HZ2  | LYS | P | 91 | -15.743 | -16.044 | -14.998 | 0.00 | 0.00 | PROA |
| 1448 | ATOM | 1448 | HZ3  | LYS | P | 91 | -14.622 | -16.355 | -16.240 | 0.00 | 0.00 | PROA |
| 1449 | ATOM | 1449 | C    | LYS | P | 91 | -12.145 | -12.313 | -14.951 | 0.00 | 0.00 | PROA |
| 1450 | ATOM | 1450 | O    | LYS | P | 91 | -12.330 | -11.821 | -13.863 | 0.00 | 0.00 | PROA |
| 1451 | ATOM | 1451 | N    | ALA | P | 92 | -11.312 | -13.398 | -15.086 | 0.00 | 0.00 | PROA |
| 1452 | ATOM | 1452 | HN   | ALA | P | 92 | -11.167 | -13.904 | -15.932 | 0.00 | 0.00 | PROA |
| 1453 | ATOM | 1453 | CA   | ALA | P | 92 | -10.593 | -13.954 | -13.972 | 0.00 | 0.00 | PROA |
| 1454 | ATOM | 1454 | HA   | ALA | P | 92 | -10.898 | -13.458 | -13.063 | 0.00 | 0.00 | PROA |
| 1455 | ATOM | 1455 | CB   | ALA | P | 92 | -11.047 | -15.379 | -13.885 | 0.00 | 0.00 | PROA |
| 1456 | ATOM | 1456 | HB1  | ALA | P | 92 | -12.150 | -15.400 | -14.018 | 0.00 | 0.00 | PROA |
| 1457 | ATOM | 1457 | HB2  | ALA | P | 92 | -10.862 | -15.757 | -12.857 | 0.00 | 0.00 | PROA |
| 1458 | ATOM | 1458 | HB3  | ALA | P | 92 | -10.521 | -16.086 | -14.561 | 0.00 | 0.00 | PROA |
| 1459 | ATOM | 1459 | C    | ALA | P | 92 | -9.105  | -13.827 | -14.116 | 0.00 | 0.00 | PROA |
| 1460 | ATOM | 1460 | O    | ALA | P | 92 | -8.329  | -14.520 | -13.419 | 0.00 | 0.00 | PROA |

|      |      |      |      |     |   |    |        |         |         |      |      |      |
|------|------|------|------|-----|---|----|--------|---------|---------|------|------|------|
| 1461 | ATOM | 1461 | N    | ASP | P | 93 | -8.641 | -12.994 | -15.064 | 0.00 | 0.00 | PROA |
| 1462 | ATOM | 1462 | HN   | ASP | P | 93 | -9.292 | -12.647 | -15.735 | 0.00 | 0.00 | PROA |
| 1463 | ATOM | 1463 | CA   | ASP | P | 93 | -7.248 | -12.743 | -15.417 | 0.00 | 0.00 | PROA |
| 1464 | ATOM | 1464 | HA   | ASP | P | 93 | -7.381 | -12.381 | -16.426 | 0.00 | 0.00 | PROA |
| 1465 | ATOM | 1465 | CB   | ASP | P | 93 | -6.696 | -11.454 | -14.744 | 0.00 | 0.00 | PROA |
| 1466 | ATOM | 1466 | HB1  | ASP | P | 93 | -6.204 | -11.630 | -13.764 | 0.00 | 0.00 | PROA |
| 1467 | ATOM | 1467 | HB2  | ASP | P | 93 | -7.633 | -10.874 | -14.600 | 0.00 | 0.00 | PROA |
| 1468 | ATOM | 1468 | CG   | ASP | P | 93 | -5.593 | -10.702 | -15.451 | 0.00 | 0.00 | PROA |
| 1469 | ATOM | 1469 | OD1  | ASP | P | 93 | -5.485 | -10.748 | -16.735 | 0.00 | 0.00 | PROA |
| 1470 | ATOM | 1470 | OD2  | ASP | P | 93 | -4.800 | -10.004 | -14.768 | 0.00 | 0.00 | PROA |
| 1471 | ATOM | 1471 | C    | ASP | P | 93 | -6.318 | -13.873 | -15.552 | 0.00 | 0.00 | PROA |
| 1472 | ATOM | 1472 | O    | ASP | P | 93 | -5.183 | -13.886 | -15.134 | 0.00 | 0.00 | PROA |
| 1473 | ATOM | 1473 | N    | ILE | P | 94 | -6.778 | -14.985 | -16.259 | 0.00 | 0.00 | PROA |
| 1474 | ATOM | 1474 | HN   | ILE | P | 94 | -7.730 | -14.960 | -16.556 | 0.00 | 0.00 | PROA |
| 1475 | ATOM | 1475 | CA   | ILE | P | 94 | -6.138 | -16.336 | -16.362 | 0.00 | 0.00 | PROA |
| 1476 | ATOM | 1476 | HA   | ILE | P | 94 | -5.122 | -16.239 | -16.008 | 0.00 | 0.00 | PROA |
| 1477 | ATOM | 1477 | CB   | ILE | P | 94 | -6.731 | -17.379 | -15.486 | 0.00 | 0.00 | PROA |
| 1478 | ATOM | 1478 | HB   | ILE | P | 94 | -6.738 | -16.941 | -14.465 | 0.00 | 0.00 | PROA |
| 1479 | ATOM | 1479 | CG2  | ILE | P | 94 | -8.263 | -17.759 | -15.761 | 0.00 | 0.00 | PROA |
| 1480 | ATOM | 1480 | HG21 | ILE | P | 94 | -8.869 | -16.828 | -15.776 | 0.00 | 0.00 | PROA |
| 1481 | ATOM | 1481 | HG22 | ILE | P | 94 | -8.759 | -18.371 | -14.978 | 0.00 | 0.00 | PROA |
| 1482 | ATOM | 1482 | HG23 | ILE | P | 94 | -8.469 | -18.219 | -16.752 | 0.00 | 0.00 | PROA |
| 1483 | ATOM | 1483 | CG1  | ILE | P | 94 | -5.883 | -18.616 | -15.383 | 0.00 | 0.00 | PROA |
| 1484 | ATOM | 1484 | HG11 | ILE | P | 94 | -4.835 | -18.284 | -15.224 | 0.00 | 0.00 | PROA |
| 1485 | ATOM | 1485 | HG12 | ILE | P | 94 | -5.817 | -19.217 | -16.315 | 0.00 | 0.00 | PROA |
| 1486 | ATOM | 1486 | CD   | ILE | P | 94 | -6.199 | -19.499 | -14.119 | 0.00 | 0.00 | PROA |
| 1487 | ATOM | 1487 | HD1  | ILE | P | 94 | -5.363 | -20.202 | -13.912 | 0.00 | 0.00 | PROA |
| 1488 | ATOM | 1488 | HD2  | ILE | P | 94 | -7.064 | -20.156 | -14.351 | 0.00 | 0.00 | PROA |
| 1489 | ATOM | 1489 | HD3  | ILE | P | 94 | -6.508 | -18.882 | -13.248 | 0.00 | 0.00 | PROA |
| 1490 | ATOM | 1490 | C    | ILE | P | 94 | -6.118 | -16.755 | -17.846 | 0.00 | 0.00 | PROA |
| 1491 | ATOM | 1491 | O    | ILE | P | 94 | -7.156 | -16.773 | -18.495 | 0.00 | 0.00 | PROA |
| 1492 | ATOM | 1492 | N    | ALA | P | 95 | -4.899 | -17.217 | -18.319 | 0.00 | 0.00 | PROA |
| 1493 | ATOM | 1493 | HN   | ALA | P | 95 | -4.016 | -17.320 | -17.867 | 0.00 | 0.00 | PROA |
| 1494 | ATOM | 1494 | CA   | ALA | P | 95 | -4.940 | -17.844 | -19.626 | 0.00 | 0.00 | PROA |
| 1495 | ATOM | 1495 | HA   | ALA | P | 95 | -5.946 | -18.164 | -19.854 | 0.00 | 0.00 | PROA |
| 1496 | ATOM | 1496 | CB   | ALA | P | 95 | -4.469 | -16.901 | -20.768 | 0.00 | 0.00 | PROA |
| 1497 | ATOM | 1497 | HB1  | ALA | P | 95 | -5.134 | -16.013 | -20.708 | 0.00 | 0.00 | PROA |
| 1498 | ATOM | 1498 | HB2  | ALA | P | 95 | -4.431 | -17.352 | -21.783 | 0.00 | 0.00 | PROA |
| 1499 | ATOM | 1499 | HB3  | ALA | P | 95 | -3.442 | -16.557 | -20.519 | 0.00 | 0.00 | PROA |
| 1500 | ATOM | 1500 | C    | ALA | P | 95 | -3.979 | -19.080 | -19.658 | 0.00 | 0.00 | PROA |
| 1501 | ATOM | 1501 | O    | ALA | P | 95 | -3.103 | -19.202 | -18.841 | 0.00 | 0.00 | PROA |
| 1502 | ATOM | 1502 | N    | LEU | P | 96 | -4.153 | -19.960 | -20.674 | 0.00 | 0.00 | PROA |
| 1503 | ATOM | 1503 | HN   | LEU | P | 96 | -4.874 | -19.756 | -21.333 | 0.00 | 0.00 | PROA |
| 1504 | ATOM | 1504 | CA   | LEU | P | 96 | -3.531 | -21.248 | -20.798 | 0.00 | 0.00 | PROA |
| 1505 | ATOM | 1505 | HA   | LEU | P | 96 | -2.767 | -21.350 | -20.042 | 0.00 | 0.00 | PROA |
| 1506 | ATOM | 1506 | CB   | LEU | P | 96 | -4.765 | -22.196 | -20.624 | 0.00 | 0.00 | PROA |
| 1507 | ATOM | 1507 | HB1  | LEU | P | 96 | -5.455 | -22.062 | -21.485 | 0.00 | 0.00 | PROA |
| 1508 | ATOM | 1508 | HB2  | LEU | P | 96 | -5.326 | -21.751 | -19.774 | 0.00 | 0.00 | PROA |
| 1509 | ATOM | 1509 | CG   | LEU | P | 96 | -4.259 | -23.614 | -20.406 | 0.00 | 0.00 | PROA |
| 1510 | ATOM | 1510 | HG   | LEU | P | 96 | -3.513 | -23.900 | -21.178 | 0.00 | 0.00 | PROA |
| 1511 | ATOM | 1511 | CD1  | LEU | P | 96 | -3.393 | -23.691 | -19.080 | 0.00 | 0.00 | PROA |
| 1512 | ATOM | 1512 | HD11 | LEU | P | 96 | -2.330 | -23.441 | -19.284 | 0.00 | 0.00 | PROA |
| 1513 | ATOM | 1513 | HD12 | LEU | P | 96 | -3.400 | -24.732 | -18.691 | 0.00 | 0.00 | PROA |
| 1514 | ATOM | 1514 | HD13 | LEU | P | 96 | -3.762 | -23.006 | -18.287 | 0.00 | 0.00 | PROA |
| 1515 | ATOM | 1515 | CD2  | LEU | P | 96 | -5.345 | -24.669 | -20.183 | 0.00 | 0.00 | PROA |
| 1516 | ATOM | 1516 | HD21 | LEU | P | 96 | -4.870 | -25.672 | -20.130 | 0.00 | 0.00 | PROA |
| 1517 | ATOM | 1517 | HD22 | LEU | P | 96 | -6.058 | -24.641 | -21.035 | 0.00 | 0.00 | PROA |
| 1518 | ATOM | 1518 | HD23 | LEU | P | 96 | -5.969 | -24.459 | -19.288 | 0.00 | 0.00 | PROA |
| 1519 | ATOM | 1519 | C    | LEU | P | 96 | -2.843 | -21.299 | -22.122 | 0.00 | 0.00 | PROA |
| 1520 | ATOM | 1520 | O    | LEU | P | 96 | -3.385 | -20.781 | -23.076 | 0.00 | 0.00 | PROA |
| 1521 | ATOM | 1521 | N    | ILE | P | 97 | -1.650 | -21.805 | -22.152 | 0.00 | 0.00 | PROA |
| 1522 | ATOM | 1522 | HN   | ILE | P | 97 | -1.269 | -22.067 | -21.269 | 0.00 | 0.00 | PROA |
| 1523 | ATOM | 1523 | CA   | ILE | P | 97 | -0.858 | -22.017 | -23.335 | 0.00 | 0.00 | PROA |
| 1524 | ATOM | 1524 | HA   | ILE | P | 97 | -1.373 | -21.711 | -24.233 | 0.00 | 0.00 | PROA |
| 1525 | ATOM | 1525 | CB   | ILE | P | 97 | 0.296  | -20.959 | -23.311 | 0.00 | 0.00 | PROA |
| 1526 | ATOM | 1526 | HB   | ILE | P | 97 | 0.818  | -20.919 | -22.331 | 0.00 | 0.00 | PROA |
| 1527 | ATOM | 1527 | CG2  | ILE | P | 97 | 1.408  | -21.306 | -24.378 | 0.00 | 0.00 | PROA |
| 1528 | ATOM | 1528 | HG21 | ILE | P | 97 | 1.814  | -22.331 | -24.237 | 0.00 | 0.00 | PROA |
| 1529 | ATOM | 1529 | HG22 | ILE | P | 97 | 2.309  | -20.656 | -24.376 | 0.00 | 0.00 | PROA |
| 1530 | ATOM | 1530 | HG23 | ILE | P | 97 | 1.101  | -21.197 | -25.440 | 0.00 | 0.00 | PROA |
| 1531 | ATOM | 1531 | CG1  | ILE | P | 97 | -0.231 | -19.506 | -23.554 | 0.00 | 0.00 | PROA |
| 1532 | ATOM | 1532 | HG11 | ILE | P | 97 | -1.271 | -19.312 | -23.215 | 0.00 | 0.00 | PROA |
| 1533 | ATOM | 1533 | HG12 | ILE | P | 97 | -0.233 | -19.460 | -24.664 | 0.00 | 0.00 | PROA |

|      |      |      |      |     |   |     |        |         |         |      |      |      |
|------|------|------|------|-----|---|-----|--------|---------|---------|------|------|------|
| 1534 | ATOM | 1534 | CD   | ILE | P | 97  | 0.586  | -18.367 | -22.973 | 0.00 | 0.00 | PROA |
| 1535 | ATOM | 1535 | HD1  | ILE | P | 97  | 0.352  | -17.364 | -23.389 | 0.00 | 0.00 | PROA |
| 1536 | ATOM | 1536 | HD2  | ILE | P | 97  | 1.667  | -18.450 | -23.217 | 0.00 | 0.00 | PROA |
| 1537 | ATOM | 1537 | HD3  | ILE | P | 97  | 0.495  | -18.393 | -21.866 | 0.00 | 0.00 | PROA |
| 1538 | ATOM | 1538 | C    | ILE | P | 97  | -0.368 | -23.431 | -23.277 | 0.00 | 0.00 | PROA |
| 1539 | ATOM | 1539 | O    | ILE | P | 97  | -0.018 | -23.912 | -22.222 | 0.00 | 0.00 | PROA |
| 1540 | ATOM | 1540 | N    | LYS | P | 98  | -0.124 | -24.179 | -24.358 | 0.00 | 0.00 | PROA |
| 1541 | ATOM | 1541 | HN   | LYS | P | 98  | -0.101 | -23.685 | -25.224 | 0.00 | 0.00 | PROA |
| 1542 | ATOM | 1542 | CA   | LYS | P | 98  | 0.355  | -25.588 | -24.342 | 0.00 | 0.00 | PROA |
| 1543 | ATOM | 1543 | HA   | LYS | P | 98  | 0.532  | -26.026 | -23.371 | 0.00 | 0.00 | PROA |
| 1544 | ATOM | 1544 | CB   | LYS | P | 98  | -0.672 | -26.539 | -25.033 | 0.00 | 0.00 | PROA |
| 1545 | ATOM | 1545 | HB1  | LYS | P | 98  | -0.876 | -26.077 | -26.022 | 0.00 | 0.00 | PROA |
| 1546 | ATOM | 1546 | HB2  | LYS | P | 98  | -1.646 | -26.471 | -24.503 | 0.00 | 0.00 | PROA |
| 1547 | ATOM | 1547 | CG   | LYS | P | 98  | -0.035 | -27.903 | -25.278 | 0.00 | 0.00 | PROA |
| 1548 | ATOM | 1548 | HG1  | LYS | P | 98  | 0.738  | -27.866 | -26.075 | 0.00 | 0.00 | PROA |
| 1549 | ATOM | 1549 | HG2  | LYS | P | 98  | -0.890 | -28.371 | -25.812 | 0.00 | 0.00 | PROA |
| 1550 | ATOM | 1550 | CD   | LYS | P | 98  | 0.226  | -28.735 | -24.016 | 0.00 | 0.00 | PROA |
| 1551 | ATOM | 1551 | HD1  | LYS | P | 98  | -0.715 | -28.596 | -23.442 | 0.00 | 0.00 | PROA |
| 1552 | ATOM | 1552 | HD2  | LYS | P | 98  | 1.079  | -28.309 | -23.446 | 0.00 | 0.00 | PROA |
| 1553 | ATOM | 1553 | CE   | LYS | P | 98  | 0.350  | -30.181 | -24.189 | 0.00 | 0.00 | PROA |
| 1554 | ATOM | 1554 | HE1  | LYS | P | 98  | -0.387 | -30.745 | -24.799 | 0.00 | 0.00 | PROA |
| 1555 | ATOM | 1555 | HE2  | LYS | P | 98  | 0.265  | -30.674 | -23.197 | 0.00 | 0.00 | PROA |
| 1556 | ATOM | 1556 | NZ   | LYS | P | 98  | 1.611  | -30.588 | -24.791 | 0.00 | 0.00 | PROA |
| 1557 | ATOM | 1557 | HZ1  | LYS | P | 98  | 1.665  | -30.386 | -25.810 | 0.00 | 0.00 | PROA |
| 1558 | ATOM | 1558 | HZ2  | LYS | P | 98  | 1.788  | -31.611 | -24.725 | 0.00 | 0.00 | PROA |
| 1559 | ATOM | 1559 | HZ3  | LYS | P | 98  | 2.443  | -30.204 | -24.298 | 0.00 | 0.00 | PROA |
| 1560 | ATOM | 1560 | C    | LYS | P | 98  | 1.758  | -25.548 | -24.957 | 0.00 | 0.00 | PROA |
| 1561 | ATOM | 1561 | O    | LYS | P | 98  | 1.845  | -25.114 | -26.043 | 0.00 | 0.00 | PROA |
| 1562 | ATOM | 1562 | N    | ILE | P | 99  | 2.843  | -26.067 | -24.325 | 0.00 | 0.00 | PROA |
| 1563 | ATOM | 1563 | HN   | ILE | P | 99  | 2.801  | -26.462 | -23.411 | 0.00 | 0.00 | PROA |
| 1564 | ATOM | 1564 | CA   | ILE | P | 99  | 4.102  | -26.469 | -25.061 | 0.00 | 0.00 | PROA |
| 1565 | ATOM | 1565 | HA   | ILE | P | 99  | 4.095  | -25.946 | -26.006 | 0.00 | 0.00 | PROA |
| 1566 | ATOM | 1566 | CB   | ILE | P | 99  | 5.323  | -26.020 | -24.280 | 0.00 | 0.00 | PROA |
| 1567 | ATOM | 1567 | HB   | ILE | P | 99  | 6.291  | -26.148 | -24.809 | 0.00 | 0.00 | PROA |
| 1568 | ATOM | 1568 | CG2  | ILE | P | 99  | 5.322  | -24.398 | -24.354 | 0.00 | 0.00 | PROA |
| 1569 | ATOM | 1569 | HG21 | ILE | P | 99  | 5.896  | -24.027 | -25.230 | 0.00 | 0.00 | PROA |
| 1570 | ATOM | 1570 | HG22 | ILE | P | 99  | 5.897  | -24.148 | -23.437 | 0.00 | 0.00 | PROA |
| 1571 | ATOM | 1571 | HG23 | ILE | P | 99  | 4.288  | -24.002 | -24.265 | 0.00 | 0.00 | PROA |
| 1572 | ATOM | 1572 | CG1  | ILE | P | 99  | 5.491  | -26.490 | -22.827 | 0.00 | 0.00 | PROA |
| 1573 | ATOM | 1573 | HG11 | ILE | P | 99  | 5.011  | -27.464 | -22.590 | 0.00 | 0.00 | PROA |
| 1574 | ATOM | 1574 | HG12 | ILE | P | 99  | 5.025  | -25.786 | -22.105 | 0.00 | 0.00 | PROA |
| 1575 | ATOM | 1575 | CD   | ILE | P | 99  | 6.975  | -26.702 | -22.538 | 0.00 | 0.00 | PROA |
| 1576 | ATOM | 1576 | HD1  | ILE | P | 99  | 7.220  | -27.003 | -21.497 | 0.00 | 0.00 | PROA |
| 1577 | ATOM | 1577 | HD2  | ILE | P | 99  | 7.517  | -25.761 | -22.771 | 0.00 | 0.00 | PROA |
| 1578 | ATOM | 1578 | HD3  | ILE | P | 99  | 7.367  | -27.537 | -23.158 | 0.00 | 0.00 | PROA |
| 1579 | ATOM | 1579 | C    | ILE | P | 99  | 4.178  | -27.941 | -25.192 | 0.00 | 0.00 | PROA |
| 1580 | ATOM | 1580 | O    | ILE | P | 99  | 3.492  | -28.706 | -24.576 | 0.00 | 0.00 | PROA |
| 1581 | ATOM | 1581 | N    | ASP | P | 100 | 5.053  | -28.513 | -26.054 | 0.00 | 0.00 | PROA |
| 1582 | ATOM | 1582 | HN   | ASP | P | 100 | 5.569  | -27.932 | -26.679 | 0.00 | 0.00 | PROA |
| 1583 | ATOM | 1583 | CA   | ASP | P | 100 | 5.107  | -29.869 | -26.448 | 0.00 | 0.00 | PROA |
| 1584 | ATOM | 1584 | HA   | ASP | P | 100 | 4.514  | -30.411 | -25.726 | 0.00 | 0.00 | PROA |
| 1585 | ATOM | 1585 | CB   | ASP | P | 100 | 4.724  | -30.239 | -27.918 | 0.00 | 0.00 | PROA |
| 1586 | ATOM | 1586 | HB1  | ASP | P | 100 | 4.733  | -31.295 | -28.264 | 0.00 | 0.00 | PROA |
| 1587 | ATOM | 1587 | HB2  | ASP | P | 100 | 5.322  | -29.640 | -28.638 | 0.00 | 0.00 | PROA |
| 1588 | ATOM | 1588 | CG   | ASP | P | 100 | 3.269  | -29.862 | -28.073 | 0.00 | 0.00 | PROA |
| 1589 | ATOM | 1589 | OD1  | ASP | P | 100 | 2.390  | -30.545 | -27.447 | 0.00 | 0.00 | PROA |
| 1590 | ATOM | 1590 | OD2  | ASP | P | 100 | 3.030  | -29.057 | -29.033 | 0.00 | 0.00 | PROA |
| 1591 | ATOM | 1591 | C    | ASP | P | 100 | 6.456  | -30.236 | -26.192 | 0.00 | 0.00 | PROA |
| 1592 | ATOM | 1592 | O    | ASP | P | 100 | 7.345  | -29.559 | -26.668 | 0.00 | 0.00 | PROA |
| 1593 | ATOM | 1593 | N    | HSD | P | 101 | 6.683  | -31.301 | -25.385 | 0.00 | 0.00 | PROA |
| 1594 | ATOM | 1594 | HN   | HSD | P | 101 | 5.956  | -31.899 | -25.056 | 0.00 | 0.00 | PROA |
| 1595 | ATOM | 1595 | CA   | HSD | P | 101 | 7.975  | -31.639 | -24.706 | 0.00 | 0.00 | PROA |
| 1596 | ATOM | 1596 | HA   | HSD | P | 101 | 8.714  | -31.250 | -25.391 | 0.00 | 0.00 | PROA |
| 1597 | ATOM | 1597 | CB   | HSD | P | 101 | 8.099  | -30.859 | -23.399 | 0.00 | 0.00 | PROA |
| 1598 | ATOM | 1598 | HB1  | HSD | P | 101 | 7.316  | -31.114 | -22.653 | 0.00 | 0.00 | PROA |
| 1599 | ATOM | 1599 | HB2  | HSD | P | 101 | 7.602  | -29.891 | -23.625 | 0.00 | 0.00 | PROA |
| 1600 | ATOM | 1600 | ND1  | HSD | P | 101 | 10.340 | -31.639 | -22.361 | 0.00 | 0.00 | PROA |
| 1601 | ATOM | 1601 | HD1  | HSD | P | 101 | 10.092 | -32.607 | -22.393 | 0.00 | 0.00 | PROA |
| 1602 | ATOM | 1602 | CG   | HSD | P | 101 | 9.482  | -30.724 | -22.827 | 0.00 | 0.00 | PROA |
| 1603 | ATOM | 1603 | CE1  | HSD | P | 101 | 11.361 | -30.972 | -21.810 | 0.00 | 0.00 | PROA |
| 1604 | ATOM | 1604 | HE1  | HSD | P | 101 | 12.150 | -31.513 | -21.288 | 0.00 | 0.00 | PROA |
| 1605 | ATOM | 1605 | NE2  | HSD | P | 101 | 11.249 | -29.701 | -21.823 | 0.00 | 0.00 | PROA |
| 1606 | ATOM | 1606 | CD2  | HSD | P | 101 | 10.082 | -29.543 | -22.521 | 0.00 | 0.00 | PROA |

|      |      |      |      |     |   |     |        |         |         |      |      |      |
|------|------|------|------|-----|---|-----|--------|---------|---------|------|------|------|
| 1607 | ATOM | 1607 | HD2  | HSD | P | 101 | 9.627  | -28.570 | -22.658 | 0.00 | 0.00 | PROA |
| 1608 | ATOM | 1608 | C    | HSD | P | 101 | 8.123  | -33.093 | -24.563 | 0.00 | 0.00 | PROA |
| 1609 | ATOM | 1609 | O    | HSD | P | 101 | 7.260  | -33.860 | -24.067 | 0.00 | 0.00 | PROA |
| 1610 | ATOM | 1610 | N    | GLN | P | 102 | 9.293  | -33.606 | -24.951 | 0.00 | 0.00 | PROA |
| 1611 | ATOM | 1611 | HN   | GLN | P | 102 | 9.941  | -33.108 | -25.522 | 0.00 | 0.00 | PROA |
| 1612 | ATOM | 1612 | CA   | GLN | P | 102 | 9.568  | -34.999 | -24.751 | 0.00 | 0.00 | PROA |
| 1613 | ATOM | 1613 | HA   | GLN | P | 102 | 8.680  | -35.501 | -25.107 | 0.00 | 0.00 | PROA |
| 1614 | ATOM | 1614 | CB   | GLN | P | 102 | 10.863 | -35.429 | -25.565 | 0.00 | 0.00 | PROA |
| 1615 | ATOM | 1615 | HB1  | GLN | P | 102 | 11.014 | -36.501 | -25.314 | 0.00 | 0.00 | PROA |
| 1616 | ATOM | 1616 | HB2  | GLN | P | 102 | 11.756 | -34.848 | -25.249 | 0.00 | 0.00 | PROA |
| 1617 | ATOM | 1617 | CG   | GLN | P | 102 | 10.837 | -35.202 | -27.045 | 0.00 | 0.00 | PROA |
| 1618 | ATOM | 1618 | HG1  | GLN | P | 102 | 11.639 | -35.811 | -27.514 | 0.00 | 0.00 | PROA |
| 1619 | ATOM | 1619 | HG2  | GLN | P | 102 | 10.972 | -34.152 | -27.384 | 0.00 | 0.00 | PROA |
| 1620 | ATOM | 1620 | CD   | GLN | P | 102 | 9.510  | -35.577 | -27.798 | 0.00 | 0.00 | PROA |
| 1621 | ATOM | 1621 | OE1  | GLN | P | 102 | 8.684  | -34.697 | -28.128 | 0.00 | 0.00 | PROA |
| 1622 | ATOM | 1622 | NE2  | GLN | P | 102 | 9.336  | -36.838 | -28.151 | 0.00 | 0.00 | PROA |
| 1623 | ATOM | 1623 | HE21 | GLN | P | 102 | 8.476  | -37.013 | -28.630 | 0.00 | 0.00 | PROA |
| 1624 | ATOM | 1624 | HE22 | GLN | P | 102 | 10.023 | -37.531 | -27.932 | 0.00 | 0.00 | PROA |
| 1625 | ATOM | 1625 | C    | GLN | P | 102 | 9.633  | -35.306 | -23.207 | 0.00 | 0.00 | PROA |
| 1626 | ATOM | 1626 | O    | GLN | P | 102 | 10.148 | -34.523 | -22.445 | 0.00 | 0.00 | PROA |
| 1627 | ATOM | 1627 | N    | GLY | P | 103 | 8.992  | -36.448 | -22.785 | 0.00 | 0.00 | PROA |
| 1628 | ATOM | 1628 | HN   | GLY | P | 103 | 8.633  | -37.108 | -23.440 | 0.00 | 0.00 | PROA |
| 1629 | ATOM | 1629 | CA   | GLY | P | 103 | 8.770  | -36.738 | -21.398 | 0.00 | 0.00 | PROA |
| 1630 | ATOM | 1630 | HA1  | GLY | P | 103 | 9.681  | -36.836 | -20.827 | 0.00 | 0.00 | PROA |
| 1631 | ATOM | 1631 | HA2  | GLY | P | 103 | 8.085  | -37.558 | -21.242 | 0.00 | 0.00 | PROA |
| 1632 | ATOM | 1632 | C    | GLY | P | 103 | 8.116  | -35.749 | -20.451 | 0.00 | 0.00 | PROA |
| 1633 | ATOM | 1633 | O    | GLY | P | 103 | 8.090  | -34.520 | -20.653 | 0.00 | 0.00 | PROA |
| 1634 | ATOM | 1634 | N    | LYS | P | 104 | 7.529  | -36.238 | -19.293 | 0.00 | 0.00 | PROA |
| 1635 | ATOM | 1635 | HN   | LYS | P | 104 | 7.611  | -37.194 | -19.021 | 0.00 | 0.00 | PROA |
| 1636 | ATOM | 1636 | CA   | LYS | P | 104 | 6.912  | -35.417 | -18.342 | 0.00 | 0.00 | PROA |
| 1637 | ATOM | 1637 | HA   | LYS | P | 104 | 6.116  | -34.943 | -18.897 | 0.00 | 0.00 | PROA |
| 1638 | ATOM | 1638 | CB   | LYS | P | 104 | 6.334  | -36.251 | -17.055 | 0.00 | 0.00 | PROA |
| 1639 | ATOM | 1639 | HB1  | LYS | P | 104 | 5.837  | -35.540 | -16.361 | 0.00 | 0.00 | PROA |
| 1640 | ATOM | 1640 | HB2  | LYS | P | 104 | 7.120  | -36.873 | -16.576 | 0.00 | 0.00 | PROA |
| 1641 | ATOM | 1641 | CG   | LYS | P | 104 | 5.385  | -37.413 | -17.495 | 0.00 | 0.00 | PROA |
| 1642 | ATOM | 1642 | HG1  | LYS | P | 104 | 5.193  | -38.041 | -16.600 | 0.00 | 0.00 | PROA |
| 1643 | ATOM | 1643 | HG2  | LYS | P | 104 | 5.810  | -38.064 | -18.288 | 0.00 | 0.00 | PROA |
| 1644 | ATOM | 1644 | CD   | LYS | P | 104 | 4.100  | -36.884 | -18.089 | 0.00 | 0.00 | PROA |
| 1645 | ATOM | 1645 | HD1  | LYS | P | 104 | 4.345  | -36.056 | -18.787 | 0.00 | 0.00 | PROA |
| 1646 | ATOM | 1646 | HD2  | LYS | P | 104 | 3.452  | -36.431 | -17.309 | 0.00 | 0.00 | PROA |
| 1647 | ATOM | 1647 | CE   | LYS | P | 104 | 3.252  | -37.986 | -18.827 | 0.00 | 0.00 | PROA |
| 1648 | ATOM | 1648 | HE1  | LYS | P | 104 | 3.252  | -38.917 | -18.221 | 0.00 | 0.00 | PROA |
| 1649 | ATOM | 1649 | HE2  | LYS | P | 104 | 3.640  | -38.184 | -19.849 | 0.00 | 0.00 | PROA |
| 1650 | ATOM | 1650 | NZ   | LYS | P | 104 | 1.864  | -37.581 | -18.979 | 0.00 | 0.00 | PROA |
| 1651 | ATOM | 1651 | HZ1  | LYS | P | 104 | 1.586  | -37.201 | -18.052 | 0.00 | 0.00 | PROA |
| 1652 | ATOM | 1652 | HZ2  | LYS | P | 104 | 1.324  | -38.436 | -19.219 | 0.00 | 0.00 | PROA |
| 1653 | ATOM | 1653 | HZ3  | LYS | P | 104 | 1.763  | -36.807 | -19.666 | 0.00 | 0.00 | PROA |
| 1654 | ATOM | 1654 | C    | LYS | P | 104 | 7.803  | -34.211 | -17.839 | 0.00 | 0.00 | PROA |
| 1655 | ATOM | 1655 | O    | LYS | P | 104 | 8.973  | -34.199 | -17.926 | 0.00 | 0.00 | PROA |
| 1656 | ATOM | 1656 | N    | LEU | P | 105 | 7.090  | -33.119 | -17.353 | 0.00 | 0.00 | PROA |
| 1657 | ATOM | 1657 | HN   | LEU | P | 105 | 6.101  | -33.221 | -17.419 | 0.00 | 0.00 | PROA |
| 1658 | ATOM | 1658 | CA   | LEU | P | 105 | 7.576  | -31.866 | -16.897 | 0.00 | 0.00 | PROA |
| 1659 | ATOM | 1659 | HA   | LEU | P | 105 | 8.653  | -31.779 | -16.891 | 0.00 | 0.00 | PROA |
| 1660 | ATOM | 1660 | CB   | LEU | P | 105 | 6.877  | -30.737 | -17.713 | 0.00 | 0.00 | PROA |
| 1661 | ATOM | 1661 | HB1  | LEU | P | 105 | 6.880  | -29.786 | -17.137 | 0.00 | 0.00 | PROA |
| 1662 | ATOM | 1662 | HB2  | LEU | P | 105 | 5.829  | -31.003 | -17.968 | 0.00 | 0.00 | PROA |
| 1663 | ATOM | 1663 | CG   | LEU | P | 105 | 7.516  | -30.569 | -19.084 | 0.00 | 0.00 | PROA |
| 1664 | ATOM | 1664 | HG   | LEU | P | 105 | 7.746  | -31.564 | -19.522 | 0.00 | 0.00 | PROA |
| 1665 | ATOM | 1665 | CD1  | LEU | P | 105 | 6.666  | -29.790 | -20.038 | 0.00 | 0.00 | PROA |
| 1666 | ATOM | 1666 | HD11 | LEU | P | 105 | 7.182  | -29.611 | -21.006 | 0.00 | 0.00 | PROA |
| 1667 | ATOM | 1667 | HD12 | LEU | P | 105 | 6.362  | -28.781 | -19.687 | 0.00 | 0.00 | PROA |
| 1668 | ATOM | 1668 | HD13 | LEU | P | 105 | 5.779  | -30.397 | -20.320 | 0.00 | 0.00 | PROA |
| 1669 | ATOM | 1669 | CD2  | LEU | P | 105 | 8.877  | -29.786 | -19.066 | 0.00 | 0.00 | PROA |
| 1670 | ATOM | 1670 | HD21 | LEU | P | 105 | 9.607  | -30.446 | -18.553 | 0.00 | 0.00 | PROA |
| 1671 | ATOM | 1671 | HD22 | LEU | P | 105 | 8.699  | -28.770 | -18.654 | 0.00 | 0.00 | PROA |
| 1672 | ATOM | 1672 | HD23 | LEU | P | 105 | 9.167  | -29.554 | -20.113 | 0.00 | 0.00 | PROA |
| 1673 | ATOM | 1673 | C    | LEU | P | 105 | 7.212  | -31.618 | -15.398 | 0.00 | 0.00 | PROA |
| 1674 | ATOM | 1674 | O    | LEU | P | 105 | 6.338  | -32.313 | -14.834 | 0.00 | 0.00 | PROA |
| 1675 | ATOM | 1675 | N    | PRO | P | 106 | 7.870  | -30.680 | -14.668 | 0.00 | 0.00 | PROA |
| 1676 | ATOM | 1676 | CD   | PRO | P | 106 | 8.907  | -29.876 | -15.264 | 0.00 | 0.00 | PROA |
| 1677 | ATOM | 1677 | HD1  | PRO | P | 106 | 8.619  | -29.172 | -16.074 | 0.00 | 0.00 | PROA |
| 1678 | ATOM | 1678 | HD2  | PRO | P | 106 | 9.748  | -30.415 | -15.750 | 0.00 | 0.00 | PROA |
| 1679 | ATOM | 1679 | CA   | PRO | P | 106 | 7.960  | -30.630 | -13.201 | 0.00 | 0.00 | PROA |

|      |      |      |      |     |   |     |        |         |         |      |      |      |
|------|------|------|------|-----|---|-----|--------|---------|---------|------|------|------|
| 1680 | ATOM | 1680 | HA   | PRO | P | 106 | 7.972  | -31.658 | -12.870 | 0.00 | 0.00 | PROA |
| 1681 | ATOM | 1681 | CB   | PRO | P | 106 | 9.290  | -29.927 | -12.958 | 0.00 | 0.00 | PROA |
| 1682 | ATOM | 1682 | HB1  | PRO | P | 106 | 10.060 | -30.726 | -13.012 | 0.00 | 0.00 | PROA |
| 1683 | ATOM | 1683 | HB2  | PRO | P | 106 | 9.388  | -29.374 | -11.999 | 0.00 | 0.00 | PROA |
| 1684 | ATOM | 1684 | CG   | PRO | P | 106 | 9.583  | -29.076 | -14.195 | 0.00 | 0.00 | PROA |
| 1685 | ATOM | 1685 | HG1  | PRO | P | 106 | 9.208  | -28.031 | -14.164 | 0.00 | 0.00 | PROA |
| 1686 | ATOM | 1686 | HG2  | PRO | P | 106 | 10.679 | -28.906 | -14.254 | 0.00 | 0.00 | PROA |
| 1687 | ATOM | 1687 | C    | PRO | P | 106 | 6.830  | -29.916 | -12.595 | 0.00 | 0.00 | PROA |
| 1688 | ATOM | 1688 | O    | PRO | P | 106 | 7.030  | -28.896 | -11.978 | 0.00 | 0.00 | PROA |
| 1689 | ATOM | 1689 | N    | VAL | P | 107 | 5.573  | -30.421 | -12.764 | 0.00 | 0.00 | PROA |
| 1690 | ATOM | 1690 | HN   | VAL | P | 107 | 5.581  | -31.289 | -13.254 | 0.00 | 0.00 | PROA |
| 1691 | ATOM | 1691 | CA   | VAL | P | 107 | 4.373  | -29.832 | -12.285 | 0.00 | 0.00 | PROA |
| 1692 | ATOM | 1692 | HA   | VAL | P | 107 | 4.208  | -29.093 | -13.055 | 0.00 | 0.00 | PROA |
| 1693 | ATOM | 1693 | CB   | VAL | P | 107 | 3.178  | -30.794 | -12.412 | 0.00 | 0.00 | PROA |
| 1694 | ATOM | 1694 | HB   | VAL | P | 107 | 3.026  | -31.069 | -13.478 | 0.00 | 0.00 | PROA |
| 1695 | ATOM | 1695 | CG1  | VAL | P | 107 | 3.516  | -32.034 | -11.650 | 0.00 | 0.00 | PROA |
| 1696 | ATOM | 1696 | HG11 | VAL | P | 107 | 3.613  | -31.811 | -10.566 | 0.00 | 0.00 | PROA |
| 1697 | ATOM | 1697 | HG12 | VAL | P | 107 | 4.380  | -32.660 | -11.959 | 0.00 | 0.00 | PROA |
| 1698 | ATOM | 1698 | HG13 | VAL | P | 107 | 2.595  | -32.652 | -11.718 | 0.00 | 0.00 | PROA |
| 1699 | ATOM | 1699 | CG2  | VAL | P | 107 | 1.789  | -30.278 | -12.004 | 0.00 | 0.00 | PROA |
| 1700 | ATOM | 1700 | HG21 | VAL | P | 107 | 1.421  | -29.375 | -12.537 | 0.00 | 0.00 | PROA |
| 1701 | ATOM | 1701 | HG22 | VAL | P | 107 | 1.761  | -30.044 | -10.919 | 0.00 | 0.00 | PROA |
| 1702 | ATOM | 1702 | HG23 | VAL | P | 107 | 1.022  | -31.067 | -12.157 | 0.00 | 0.00 | PROA |
| 1703 | ATOM | 1703 | C    | VAL | P | 107 | 4.342  | -29.154 | -10.874 | 0.00 | 0.00 | PROA |
| 1704 | ATOM | 1704 | O    | VAL | P | 107 | 4.562  | -29.814 | -9.886  | 0.00 | 0.00 | PROA |
| 1705 | ATOM | 1705 | N    | LEU | P | 108 | 4.005  | -27.832 | -10.818 | 0.00 | 0.00 | PROA |
| 1706 | ATOM | 1706 | HN   | LEU | P | 108 | 3.854  | -27.350 | -11.678 | 0.00 | 0.00 | PROA |
| 1707 | ATOM | 1707 | CA   | LEU | P | 108 | 3.779  | -27.160 | -9.500  | 0.00 | 0.00 | PROA |
| 1708 | ATOM | 1708 | HA   | LEU | P | 108 | 4.597  | -27.556 | -8.916  | 0.00 | 0.00 | PROA |
| 1709 | ATOM | 1709 | CB   | LEU | P | 108 | 3.876  | -25.673 | -9.474  | 0.00 | 0.00 | PROA |
| 1710 | ATOM | 1710 | HB1  | LEU | P | 108 | 3.909  | -25.270 | -8.439  | 0.00 | 0.00 | PROA |
| 1711 | ATOM | 1711 | HB2  | LEU | P | 108 | 2.960  | -25.205 | -9.894  | 0.00 | 0.00 | PROA |
| 1712 | ATOM | 1712 | CG   | LEU | P | 108 | 5.196  | -25.190 | -10.094 | 0.00 | 0.00 | PROA |
| 1713 | ATOM | 1713 | HG   | LEU | P | 108 | 5.225  | -25.370 | -11.190 | 0.00 | 0.00 | PROA |
| 1714 | ATOM | 1714 | CD1  | LEU | P | 108 | 5.048  | -23.699 | -10.005 | 0.00 | 0.00 | PROA |
| 1715 | ATOM | 1715 | HD11 | LEU | P | 108 | 5.886  | -23.113 | -10.441 | 0.00 | 0.00 | PROA |
| 1716 | ATOM | 1716 | HD12 | LEU | P | 108 | 4.931  | -23.275 | -8.985  | 0.00 | 0.00 | PROA |
| 1717 | ATOM | 1717 | HD13 | LEU | P | 108 | 4.043  | -23.507 | -10.437 | 0.00 | 0.00 | PROA |
| 1718 | ATOM | 1718 | CD2  | LEU | P | 108 | 6.401  | -25.595 | -9.243  | 0.00 | 0.00 | PROA |
| 1719 | ATOM | 1719 | HD21 | LEU | P | 108 | 6.563  | -26.671 | -9.470  | 0.00 | 0.00 | PROA |
| 1720 | ATOM | 1720 | HD22 | LEU | P | 108 | 6.294  | -25.504 | -8.141  | 0.00 | 0.00 | PROA |
| 1721 | ATOM | 1721 | HD23 | LEU | P | 108 | 7.322  | -25.093 | -9.609  | 0.00 | 0.00 | PROA |
| 1722 | ATOM | 1722 | C    | LEU | P | 108 | 2.512  | -27.638 | -8.742  | 0.00 | 0.00 | PROA |
| 1723 | ATOM | 1723 | O    | LEU | P | 108 | 1.494  | -28.014 | -9.431  | 0.00 | 0.00 | PROA |
| 1724 | ATOM | 1724 | N    | LEU | P | 109 | 2.558  | -27.731 | -7.430  | 0.00 | 0.00 | PROA |
| 1725 | ATOM | 1725 | HN   | LEU | P | 109 | 3.367  | -27.362 | -6.980  | 0.00 | 0.00 | PROA |
| 1726 | ATOM | 1726 | CA   | LEU | P | 109 | 1.518  | -28.403 | -6.716  | 0.00 | 0.00 | PROA |
| 1727 | ATOM | 1727 | HA   | LEU | P | 109 | 0.879  | -28.996 | -7.353  | 0.00 | 0.00 | PROA |
| 1728 | ATOM | 1728 | CB   | LEU | P | 109 | 1.938  | -29.421 | -5.592  | 0.00 | 0.00 | PROA |
| 1729 | ATOM | 1729 | HB1  | LEU | P | 109 | 2.350  | -29.031 | -4.636  | 0.00 | 0.00 | PROA |
| 1730 | ATOM | 1730 | HB2  | LEU | P | 109 | 2.709  | -30.080 | -6.046  | 0.00 | 0.00 | PROA |
| 1731 | ATOM | 1731 | CG   | LEU | P | 109 | 0.754  | -30.399 | -5.205  | 0.00 | 0.00 | PROA |
| 1732 | ATOM | 1732 | HG   | LEU | P | 109 | -0.099 | -30.322 | -5.912  | 0.00 | 0.00 | PROA |
| 1733 | ATOM | 1733 | CD1  | LEU | P | 109 | 1.095  | -31.894 | -5.207  | 0.00 | 0.00 | PROA |
| 1734 | ATOM | 1734 | HD11 | LEU | P | 109 | 0.348  | -32.448 | -4.601  | 0.00 | 0.00 | PROA |
| 1735 | ATOM | 1735 | HD12 | LEU | P | 109 | 2.054  | -32.102 | -4.687  | 0.00 | 0.00 | PROA |
| 1736 | ATOM | 1736 | HD13 | LEU | P | 109 | 1.232  | -32.249 | -6.251  | 0.00 | 0.00 | PROA |
| 1737 | ATOM | 1737 | CD2  | LEU | P | 109 | 0.266  | -29.940 | -3.814  | 0.00 | 0.00 | PROA |
| 1738 | ATOM | 1738 | HD21 | LEU | P | 109 | 1.124  | -29.945 | -3.109  | 0.00 | 0.00 | PROA |
| 1739 | ATOM | 1739 | HD22 | LEU | P | 109 | -0.578 | -30.550 | -3.427  | 0.00 | 0.00 | PROA |
| 1740 | ATOM | 1740 | HD23 | LEU | P | 109 | -0.119 | -28.901 | -3.894  | 0.00 | 0.00 | PROA |
| 1741 | ATOM | 1741 | C    | LEU | P | 109 | 0.664  | -27.311 | -6.209  | 0.00 | 0.00 | PROA |
| 1742 | ATOM | 1742 | O    | LEU | P | 109 | 1.099  | -26.299 | -5.647  | 0.00 | 0.00 | PROA |
| 1743 | ATOM | 1743 | N    | LEU | P | 110 | -0.674 | -27.387 | -6.619  | 0.00 | 0.00 | PROA |
| 1744 | ATOM | 1744 | HN   | LEU | P | 110 | -1.072 | -28.225 | -6.985  | 0.00 | 0.00 | PROA |
| 1745 | ATOM | 1745 | CA   | LEU | P | 110 | -1.620 | -26.382 | -6.156  | 0.00 | 0.00 | PROA |
| 1746 | ATOM | 1746 | HA   | LEU | P | 110 | -1.152 | -25.409 | -6.160  | 0.00 | 0.00 | PROA |
| 1747 | ATOM | 1747 | CB   | LEU | P | 110 | -2.883 | -26.406 | -7.046  | 0.00 | 0.00 | PROA |
| 1748 | ATOM | 1748 | HB1  | LEU | P | 110 | -3.663 | -25.679 | -6.736  | 0.00 | 0.00 | PROA |
| 1749 | ATOM | 1749 | HB2  | LEU | P | 110 | -3.358 | -27.403 | -6.933  | 0.00 | 0.00 | PROA |
| 1750 | ATOM | 1750 | CG   | LEU | P | 110 | -2.532 | -26.218 | -8.564  | 0.00 | 0.00 | PROA |
| 1751 | ATOM | 1751 | HG   | LEU | P | 110 | -1.778 | -26.960 | -8.904  | 0.00 | 0.00 | PROA |
| 1752 | ATOM | 1752 | CD1  | LEU | P | 110 | -3.853 | -26.287 | -9.340  | 0.00 | 0.00 | PROA |



|      |      |      |      |     |   |     |         |         |         |      |      |      |
|------|------|------|------|-----|---|-----|---------|---------|---------|------|------|------|
| 1753 | ATOM | 1753 | HD11 | LEU | P | 110 | -4.516  | -25.523 | -8.880  | 0.00 | 0.00 | PROA |
| 1754 | ATOM | 1754 | HD12 | LEU | P | 110 | -4.360  | -27.231 | -9.047  | 0.00 | 0.00 | PROA |
| 1755 | ATOM | 1755 | HD13 | LEU | P | 110 | -3.739  | -26.153 | -10.437 | 0.00 | 0.00 | PROA |
| 1756 | ATOM | 1756 | CD2  | LEU | P | 110 | -1.960  | -24.759 | -8.821  | 0.00 | 0.00 | PROA |
| 1757 | ATOM | 1757 | HD21 | LEU | P | 110 | -0.863  | -24.666 | -8.672  | 0.00 | 0.00 | PROA |
| 1758 | ATOM | 1758 | HD22 | LEU | P | 110 | -2.600  | -24.058 | -8.243  | 0.00 | 0.00 | PROA |
| 1759 | ATOM | 1759 | HD23 | LEU | P | 110 | -1.990  | -24.705 | -9.930  | 0.00 | 0.00 | PROA |
| 1760 | ATOM | 1760 | C    | LEU | P | 110 | -2.140  | -26.583 | -4.779  | 0.00 | 0.00 | PROA |
| 1761 | ATOM | 1761 | O    | LEU | P | 110 | -2.812  | -27.501 | -4.454  | 0.00 | 0.00 | PROA |
| 1762 | ATOM | 1762 | N    | GLY | P | 111 | -1.823  | -25.639 | -3.877  | 0.00 | 0.00 | PROA |
| 1763 | ATOM | 1763 | HN   | GLY | P | 111 | -1.335  | -24.835 | -4.208  | 0.00 | 0.00 | PROA |
| 1764 | ATOM | 1764 | CA   | GLY | P | 111 | -2.158  | -25.662 | -2.469  | 0.00 | 0.00 | PROA |
| 1765 | ATOM | 1765 | HA1  | GLY | P | 111 | -1.469  | -24.971 | -2.005  | 0.00 | 0.00 | PROA |
| 1766 | ATOM | 1766 | HA2  | GLY | P | 111 | -2.015  | -26.704 | -2.221  | 0.00 | 0.00 | PROA |
| 1767 | ATOM | 1767 | C    | GLY | P | 111 | -3.470  | -25.219 | -2.223  | 0.00 | 0.00 | PROA |
| 1768 | ATOM | 1768 | O    | GLY | P | 111 | -4.139  | -24.706 | -3.124  | 0.00 | 0.00 | PROA |
| 1769 | ATOM | 1769 | N    | ARG | P | 112 | -3.958  | -25.373 | -1.004  | 0.00 | 0.00 | PROA |
| 1770 | ATOM | 1770 | HN   | ARG | P | 112 | -3.343  | -25.526 | -0.235  | 0.00 | 0.00 | PROA |
| 1771 | ATOM | 1771 | CA   | ARG | P | 112 | -5.337  | -25.039 | -0.679  | 0.00 | 0.00 | PROA |
| 1772 | ATOM | 1772 | HA   | ARG | P | 112 | -5.954  | -25.195 | -1.551  | 0.00 | 0.00 | PROA |
| 1773 | ATOM | 1773 | CB   | ARG | P | 112 | -5.972  | -26.024 | 0.317   | 0.00 | 0.00 | PROA |
| 1774 | ATOM | 1774 | HB1  | ARG | P | 112 | -6.975  | -25.688 | 0.658   | 0.00 | 0.00 | PROA |
| 1775 | ATOM | 1775 | HB2  | ARG | P | 112 | -5.340  | -26.061 | 1.230   | 0.00 | 0.00 | PROA |
| 1776 | ATOM | 1776 | CG   | ARG | P | 112 | -6.275  | -27.461 | -0.284  | 0.00 | 0.00 | PROA |
| 1777 | ATOM | 1777 | HG1  | ARG | P | 112 | -6.830  | -27.338 | -1.238  | 0.00 | 0.00 | PROA |
| 1778 | ATOM | 1778 | HG2  | ARG | P | 112 | -7.007  | -27.929 | 0.409   | 0.00 | 0.00 | PROA |
| 1779 | ATOM | 1779 | CD   | ARG | P | 112 | -5.004  | -28.298 | -0.601  | 0.00 | 0.00 | PROA |
| 1780 | ATOM | 1780 | HD1  | ARG | P | 112 | -4.463  | -27.804 | -1.436  | 0.00 | 0.00 | PROA |
| 1781 | ATOM | 1781 | HD2  | ARG | P | 112 | -5.324  | -29.323 | -0.884  | 0.00 | 0.00 | PROA |
| 1782 | ATOM | 1782 | NE   | ARG | P | 112 | -4.077  | -28.462 | 0.616   | 0.00 | 0.00 | PROA |
| 1783 | ATOM | 1783 | HE   | ARG | P | 112 | -4.416  | -28.110 | 1.489   | 0.00 | 0.00 | PROA |
| 1784 | ATOM | 1784 | CZ   | ARG | P | 112 | -2.736  | -28.368 | 0.571   | 0.00 | 0.00 | PROA |
| 1785 | ATOM | 1785 | NH1  | ARG | P | 112 | -2.043  | -28.809 | -0.477  | 0.00 | 0.00 | PROA |
| 1786 | ATOM | 1786 | HH11 | ARG | P | 112 | -2.601  | -29.152 | -1.233  | 0.00 | 0.00 | PROA |
| 1787 | ATOM | 1787 | HH12 | ARG | P | 112 | -1.055  | -28.658 | -0.471  | 0.00 | 0.00 | PROA |
| 1788 | ATOM | 1788 | NH2  | ARG | P | 112 | -2.046  | -27.916 | 1.587   | 0.00 | 0.00 | PROA |
| 1789 | ATOM | 1789 | HH21 | ARG | P | 112 | -2.509  | -27.983 | 2.471   | 0.00 | 0.00 | PROA |
| 1790 | ATOM | 1790 | HH22 | ARG | P | 112 | -1.063  | -27.759 | 1.489   | 0.00 | 0.00 | PROA |
| 1791 | ATOM | 1791 | C    | ARG | P | 112 | -5.412  | -23.621 | -0.207  | 0.00 | 0.00 | PROA |
| 1792 | ATOM | 1792 | O    | ARG | P | 112 | -4.998  | -23.254 | 0.886   | 0.00 | 0.00 | PROA |
| 1793 | ATOM | 1793 | N    | SER | P | 113 | -5.907  | -22.717 | -1.070  | 0.00 | 0.00 | PROA |
| 1794 | ATOM | 1794 | HN   | SER | P | 113 | -6.316  | -22.878 | -1.965  | 0.00 | 0.00 | PROA |
| 1795 | ATOM | 1795 | CA   | SER | P | 113 | -5.939  | -21.312 | -0.795  | 0.00 | 0.00 | PROA |
| 1796 | ATOM | 1796 | HA   | SER | P | 113 | -5.117  | -20.981 | -0.177  | 0.00 | 0.00 | PROA |
| 1797 | ATOM | 1797 | CB   | SER | P | 113 | -5.874  | -20.556 | -2.075  | 0.00 | 0.00 | PROA |
| 1798 | ATOM | 1798 | HB1  | SER | P | 113 | -4.968  | -20.818 | -2.662  | 0.00 | 0.00 | PROA |
| 1799 | ATOM | 1799 | HB2  | SER | P | 113 | -5.799  | -19.448 | -2.040  | 0.00 | 0.00 | PROA |
| 1800 | ATOM | 1800 | OG   | SER | P | 113 | -7.012  | -20.797 | -2.948  | 0.00 | 0.00 | PROA |
| 1801 | ATOM | 1801 | HG1  | SER | P | 113 | -7.050  | -21.748 | -3.074  | 0.00 | 0.00 | PROA |
| 1802 | ATOM | 1802 | C    | SER | P | 113 | -7.289  | -20.957 | -0.100  | 0.00 | 0.00 | PROA |
| 1803 | ATOM | 1803 | O    | SER | P | 113 | -7.503  | -19.820 | 0.255   | 0.00 | 0.00 | PROA |
| 1804 | ATOM | 1804 | N    | SER | P | 114 | -8.198  | -21.934 | 0.161   | 0.00 | 0.00 | PROA |
| 1805 | ATOM | 1805 | HN   | SER | P | 114 | -8.191  | -22.759 | -0.399  | 0.00 | 0.00 | PROA |
| 1806 | ATOM | 1806 | CA   | SER | P | 114 | -9.291  | -21.631 | 1.052   | 0.00 | 0.00 | PROA |
| 1807 | ATOM | 1807 | HA   | SER | P | 114 | -9.544  | -20.587 | 0.941   | 0.00 | 0.00 | PROA |
| 1808 | ATOM | 1808 | CB   | SER | P | 114 | -10.573 | -22.372 | 0.726   | 0.00 | 0.00 | PROA |
| 1809 | ATOM | 1809 | HB1  | SER | P | 114 | -11.053 | -21.923 | -0.170  | 0.00 | 0.00 | PROA |
| 1810 | ATOM | 1810 | HB2  | SER | P | 114 | -11.371 | -22.248 | 1.490   | 0.00 | 0.00 | PROA |
| 1811 | ATOM | 1811 | OG   | SER | P | 114 | -10.360 | -23.786 | 0.689   | 0.00 | 0.00 | PROA |
| 1812 | ATOM | 1812 | HG1  | SER | P | 114 | -9.632  | -24.071 | 0.132   | 0.00 | 0.00 | PROA |
| 1813 | ATOM | 1813 | C    | SER | P | 114 | -8.990  | -21.841 | 2.508   | 0.00 | 0.00 | PROA |
| 1814 | ATOM | 1814 | O    | SER | P | 114 | -9.677  | -21.261 | 3.292   | 0.00 | 0.00 | PROA |
| 1815 | ATOM | 1815 | N    | GLU | P | 115 | -8.093  | -22.742 | 2.810   | 0.00 | 0.00 | PROA |
| 1816 | ATOM | 1816 | HN   | GLU | P | 115 | -7.791  | -23.470 | 2.200   | 0.00 | 0.00 | PROA |
| 1817 | ATOM | 1817 | CA   | GLU | P | 115 | -7.694  | -22.948 | 4.162   | 0.00 | 0.00 | PROA |
| 1818 | ATOM | 1818 | HA   | GLU | P | 115 | -8.538  | -22.896 | 4.834   | 0.00 | 0.00 | PROA |
| 1819 | ATOM | 1819 | CB   | GLU | P | 115 | -7.117  | -24.345 | 4.210   | 0.00 | 0.00 | PROA |
| 1820 | ATOM | 1820 | HB1  | GLU | P | 115 | -6.580  | -24.470 | 5.174   | 0.00 | 0.00 | PROA |
| 1821 | ATOM | 1821 | HB2  | GLU | P | 115 | -6.308  | -24.531 | 3.471   | 0.00 | 0.00 | PROA |
| 1822 | ATOM | 1822 | CG   | GLU | P | 115 | -8.257  | -25.388 | 4.215   | 0.00 | 0.00 | PROA |
| 1823 | ATOM | 1823 | HG1  | GLU | P | 115 | -8.883  | -25.413 | 3.298   | 0.00 | 0.00 | PROA |
| 1824 | ATOM | 1824 | HG2  | GLU | P | 115 | -8.931  | -25.246 | 5.087   | 0.00 | 0.00 | PROA |
| 1825 | ATOM | 1825 | CD   | GLU | P | 115 | -7.657  | -26.737 | 4.336   | 0.00 | 0.00 | PROA |

|      |      |      |      |     |   |     |         |         |        |      |      |      |
|------|------|------|------|-----|---|-----|---------|---------|--------|------|------|------|
| 1826 | ATOM | 1826 | OE1  | GLU | P | 115 | -8.108  | -27.549 | 5.198  | 0.00 | 0.00 | PROA |
| 1827 | ATOM | 1827 | OE2  | GLU | P | 115 | -6.698  | -27.109 | 3.582  | 0.00 | 0.00 | PROA |
| 1828 | ATOM | 1828 | C    | GLU | P | 115 | -6.628  | -21.888 | 4.569  | 0.00 | 0.00 | PROA |
| 1829 | ATOM | 1829 | O    | GLU | P | 115 | -6.339  | -21.792 | 5.763  | 0.00 | 0.00 | PROA |
| 1830 | ATOM | 1830 | N    | LEU | P | 116 | -6.255  | -20.990 | 3.655  | 0.00 | 0.00 | PROA |
| 1831 | ATOM | 1831 | HN   | LEU | P | 116 | -6.605  | -21.014 | 2.722  | 0.00 | 0.00 | PROA |
| 1832 | ATOM | 1832 | CA   | LEU | P | 116 | -5.389  | -19.868 | 3.903  | 0.00 | 0.00 | PROA |
| 1833 | ATOM | 1833 | HA   | LEU | P | 116 | -4.584  | -20.201 | 4.542  | 0.00 | 0.00 | PROA |
| 1834 | ATOM | 1834 | CB   | LEU | P | 116 | -4.939  | -19.280 | 2.498  | 0.00 | 0.00 | PROA |
| 1835 | ATOM | 1835 | HB1  | LEU | P | 116 | -5.852  | -19.072 | 1.902  | 0.00 | 0.00 | PROA |
| 1836 | ATOM | 1836 | HB2  | LEU | P | 116 | -4.419  | -20.083 | 1.933  | 0.00 | 0.00 | PROA |
| 1837 | ATOM | 1837 | CG   | LEU | P | 116 | -3.904  | -18.114 | 2.411  | 0.00 | 0.00 | PROA |
| 1838 | ATOM | 1838 | HG   | LEU | P | 116 | -4.245  | -17.203 | 2.946  | 0.00 | 0.00 | PROA |
| 1839 | ATOM | 1839 | CD1  | LEU | P | 116 | -2.598  | -18.374 | 3.270  | 0.00 | 0.00 | PROA |
| 1840 | ATOM | 1840 | HD11 | LEU | P | 116 | -2.027  | -17.434 | 3.113  | 0.00 | 0.00 | PROA |
| 1841 | ATOM | 1841 | HD12 | LEU | P | 116 | -1.970  | -19.196 | 2.865  | 0.00 | 0.00 | PROA |
| 1842 | ATOM | 1842 | HD13 | LEU | P | 116 | -2.904  | -18.510 | 4.330  | 0.00 | 0.00 | PROA |
| 1843 | ATOM | 1843 | CD2  | LEU | P | 116 | -3.498  | -17.825 | 0.967  | 0.00 | 0.00 | PROA |
| 1844 | ATOM | 1844 | HD21 | LEU | P | 116 | -3.106  | -18.825 | 0.682  | 0.00 | 0.00 | PROA |
| 1845 | ATOM | 1845 | HD22 | LEU | P | 116 | -2.736  | -17.023 | 1.070  | 0.00 | 0.00 | PROA |
| 1846 | ATOM | 1846 | HD23 | LEU | P | 116 | -4.317  | -17.483 | 0.300  | 0.00 | 0.00 | PROA |
| 1847 | ATOM | 1847 | C    | LEU | P | 116 | -6.216  | -18.870 | 4.690  | 0.00 | 0.00 | PROA |
| 1848 | ATOM | 1848 | O    | LEU | P | 116 | -7.425  | -18.730 | 4.562  | 0.00 | 0.00 | PROA |
| 1849 | ATOM | 1849 | N    | GLN | P | 117 | -5.543  | -18.011 | 5.556  | 0.00 | 0.00 | PROA |
| 1850 | ATOM | 1850 | HN   | GLN | P | 117 | -4.552  | -18.016 | 5.661  | 0.00 | 0.00 | PROA |
| 1851 | ATOM | 1851 | CA   | GLN | P | 117 | -6.221  | -17.125 | 6.526  | 0.00 | 0.00 | PROA |
| 1852 | ATOM | 1852 | HA   | GLN | P | 117 | -7.055  | -16.667 | 6.017  | 0.00 | 0.00 | PROA |
| 1853 | ATOM | 1853 | CB   | GLN | P | 117 | -6.384  | -17.804 | 7.926  | 0.00 | 0.00 | PROA |
| 1854 | ATOM | 1854 | HB1  | GLN | P | 117 | -6.540  | -17.091 | 8.764  | 0.00 | 0.00 | PROA |
| 1855 | ATOM | 1855 | HB2  | GLN | P | 117 | -5.400  | -18.227 | 8.220  | 0.00 | 0.00 | PROA |
| 1856 | ATOM | 1856 | CG   | GLN | P | 117 | -7.511  | -18.891 | 8.187  | 0.00 | 0.00 | PROA |
| 1857 | ATOM | 1857 | HG1  | GLN | P | 117 | -7.681  | -19.122 | 9.260  | 0.00 | 0.00 | PROA |
| 1858 | ATOM | 1858 | HG2  | GLN | P | 117 | -7.261  | -19.917 | 7.842  | 0.00 | 0.00 | PROA |
| 1859 | ATOM | 1859 | CD   | GLN | P | 117 | -8.924  | -18.535 | 7.668  | 0.00 | 0.00 | PROA |
| 1860 | ATOM | 1860 | OE1  | GLN | P | 117 | -9.740  | -19.327 | 7.110  | 0.00 | 0.00 | PROA |
| 1861 | ATOM | 1861 | NE2  | GLN | P | 117 | -9.301  | -17.245 | 7.811  | 0.00 | 0.00 | PROA |
| 1862 | ATOM | 1862 | HE21 | GLN | P | 117 | -8.719  | -16.652 | 8.367  | 0.00 | 0.00 | PROA |
| 1863 | ATOM | 1863 | HE22 | GLN | P | 117 | -10.279 | -17.055 | 7.729  | 0.00 | 0.00 | PROA |
| 1864 | ATOM | 1864 | C    | GLN | P | 117 | -5.183  | -15.976 | 6.753  | 0.00 | 0.00 | PROA |
| 1865 | ATOM | 1865 | O    | GLN | P | 117 | -4.003  | -16.276 | 6.597  | 0.00 | 0.00 | PROA |
| 1866 | ATOM | 1866 | N    | PRO | P | 118 | -5.559  | -14.690 | 7.049  | 0.00 | 0.00 | PROA |
| 1867 | ATOM | 1867 | CD   | PRO | P | 118 | -6.888  | -14.169 | 6.801  | 0.00 | 0.00 | PROA |
| 1868 | ATOM | 1868 | HD1  | PRO | P | 118 | -7.618  | -14.686 | 7.459  | 0.00 | 0.00 | PROA |
| 1869 | ATOM | 1869 | HD2  | PRO | P | 118 | -7.103  | -14.204 | 5.711  | 0.00 | 0.00 | PROA |
| 1870 | ATOM | 1870 | CA   | PRO | P | 118 | -4.645  | -13.676 | 7.482  | 0.00 | 0.00 | PROA |
| 1871 | ATOM | 1871 | HA   | PRO | P | 118 | -4.137  | -13.449 | 6.557  | 0.00 | 0.00 | PROA |
| 1872 | ATOM | 1872 | CB   | PRO | P | 118 | -5.512  | -12.546 | 8.072  | 0.00 | 0.00 | PROA |
| 1873 | ATOM | 1873 | HB1  | PRO | P | 118 | -5.064  | -11.542 | 7.913  | 0.00 | 0.00 | PROA |
| 1874 | ATOM | 1874 | HB2  | PRO | P | 118 | -5.837  | -12.770 | 9.110  | 0.00 | 0.00 | PROA |
| 1875 | ATOM | 1875 | CG   | PRO | P | 118 | -6.776  | -12.651 | 7.190  | 0.00 | 0.00 | PROA |
| 1876 | ATOM | 1876 | HG1  | PRO | P | 118 | -7.606  | -12.252 | 7.811  | 0.00 | 0.00 | PROA |
| 1877 | ATOM | 1877 | HG2  | PRO | P | 118 | -6.788  | -12.055 | 6.252  | 0.00 | 0.00 | PROA |
| 1878 | ATOM | 1878 | C    | PRO | P | 118 | -3.446  | -14.035 | 8.429  | 0.00 | 0.00 | PROA |
| 1879 | ATOM | 1879 | O    | PRO | P | 118 | -3.658  | -14.813 | 9.391  | 0.00 | 0.00 | PROA |
| 1880 | ATOM | 1880 | N    | GLY | P | 119 | -2.255  | -13.428 | 8.259  | 0.00 | 0.00 | PROA |
| 1881 | ATOM | 1881 | HN   | GLY | P | 119 | -2.166  | -12.869 | 7.439  | 0.00 | 0.00 | PROA |
| 1882 | ATOM | 1882 | CA   | GLY | P | 119 | -1.160  | -13.514 | 9.196  | 0.00 | 0.00 | PROA |
| 1883 | ATOM | 1883 | HA1  | GLY | P | 119 | -1.521  | -13.628 | 10.208 | 0.00 | 0.00 | PROA |
| 1884 | ATOM | 1884 | HA2  | GLY | P | 119 | -0.608  | -12.606 | 8.999  | 0.00 | 0.00 | PROA |
| 1885 | ATOM | 1885 | C    | GLY | P | 119 | -0.264  | -14.657 | 8.874  | 0.00 | 0.00 | PROA |
| 1886 | ATOM | 1886 | O    | GLY | P | 119 | 0.299   | -15.243 | 9.750  | 0.00 | 0.00 | PROA |
| 1887 | ATOM | 1887 | N    | GLU | P | 120 | -0.089  | -14.914 | 7.540  | 0.00 | 0.00 | PROA |
| 1888 | ATOM | 1888 | HN   | GLU | P | 120 | -0.700  | -14.410 | 6.934  | 0.00 | 0.00 | PROA |
| 1889 | ATOM | 1889 | CA   | GLU | P | 120 | 0.579   | -16.002 | 6.943  | 0.00 | 0.00 | PROA |
| 1890 | ATOM | 1890 | HA   | GLU | P | 120 | 1.174   | -16.573 | 7.640  | 0.00 | 0.00 | PROA |
| 1891 | ATOM | 1891 | CB   | GLU | P | 120 | -0.342  | -17.018 | 6.308  | 0.00 | 0.00 | PROA |
| 1892 | ATOM | 1892 | HB1  | GLU | P | 120 | -0.970  | -16.498 | 5.554  | 0.00 | 0.00 | PROA |
| 1893 | ATOM | 1893 | HB2  | GLU | P | 120 | -1.055  | -17.339 | 7.098  | 0.00 | 0.00 | PROA |
| 1894 | ATOM | 1894 | CG   | GLU | P | 120 | 0.301   | -18.311 | 5.761  | 0.00 | 0.00 | PROA |
| 1895 | ATOM | 1895 | HG1  | GLU | P | 120 | 0.894   | -18.135 | 4.838  | 0.00 | 0.00 | PROA |
| 1896 | ATOM | 1896 | HG2  | GLU | P | 120 | -0.569  | -18.995 | 5.655  | 0.00 | 0.00 | PROA |
| 1897 | ATOM | 1897 | CD   | GLU | P | 120 | 1.124   | -18.986 | 6.863  | 0.00 | 0.00 | PROA |
| 1898 | ATOM | 1898 | OE1  | GLU | P | 120 | 0.647   | -19.279 | 7.975  | 0.00 | 0.00 | PROA |

|      |      |      |      |     |   |     |       |         |        |      |      |      |
|------|------|------|------|-----|---|-----|-------|---------|--------|------|------|------|
| 1899 | ATOM | 1899 | OE2  | GLU | P | 120 | 2.356 | -19.062 | 6.683  | 0.00 | 0.00 | PROA |
| 1900 | ATOM | 1900 | C    | GLU | P | 120 | 1.505 | -15.403 | 5.959  | 0.00 | 0.00 | PROA |
| 1901 | ATOM | 1901 | O    | GLU | P | 120 | 0.996 | -14.877 | 4.990  | 0.00 | 0.00 | PROA |
| 1902 | ATOM | 1902 | N    | PHE | P | 121 | 2.807 | -15.585 | 6.125  | 0.00 | 0.00 | PROA |
| 1903 | ATOM | 1903 | HN   | PHE | P | 121 | 3.039 | -16.074 | 6.962  | 0.00 | 0.00 | PROA |
| 1904 | ATOM | 1904 | CA   | PHE | P | 121 | 3.905 | -14.989 | 5.357  | 0.00 | 0.00 | PROA |
| 1905 | ATOM | 1905 | HA   | PHE | P | 121 | 3.493 | -14.103 | 4.897  | 0.00 | 0.00 | PROA |
| 1906 | ATOM | 1906 | CB   | PHE | P | 121 | 5.030 | -14.539 | 6.381  | 0.00 | 0.00 | PROA |
| 1907 | ATOM | 1907 | HB1  | PHE | P | 121 | 5.466 | -15.397 | 6.936  | 0.00 | 0.00 | PROA |
| 1908 | ATOM | 1908 | HB2  | PHE | P | 121 | 4.487 | -13.891 | 7.102  | 0.00 | 0.00 | PROA |
| 1909 | ATOM | 1909 | CG   | PHE | P | 121 | 6.102 | -13.769 | 5.722  | 0.00 | 0.00 | PROA |
| 1910 | ATOM | 1910 | CD1  | PHE | P | 121 | 7.370 | -14.388 | 5.543  | 0.00 | 0.00 | PROA |
| 1911 | ATOM | 1911 | HD1  | PHE | P | 121 | 7.456 | -15.457 | 5.673  | 0.00 | 0.00 | PROA |
| 1912 | ATOM | 1912 | CE1  | PHE | P | 121 | 8.480 | -13.640 | 5.074  | 0.00 | 0.00 | PROA |
| 1913 | ATOM | 1913 | HE1  | PHE | P | 121 | 9.419 | -14.144 | 4.895  | 0.00 | 0.00 | PROA |
| 1914 | ATOM | 1914 | CZ   | PHE | P | 121 | 8.344 | -12.219 | 4.902  | 0.00 | 0.00 | PROA |
| 1915 | ATOM | 1915 | HZ   | PHE | P | 121 | 9.174 | -11.698 | 4.448  | 0.00 | 0.00 | PROA |
| 1916 | ATOM | 1916 | CD2  | PHE | P | 121 | 5.964 | -12.345 | 5.544  | 0.00 | 0.00 | PROA |
| 1917 | ATOM | 1917 | HD2  | PHE | P | 121 | 5.067 | -11.837 | 5.866  | 0.00 | 0.00 | PROA |
| 1918 | ATOM | 1918 | CE2  | PHE | P | 121 | 7.128 | -11.620 | 5.177  | 0.00 | 0.00 | PROA |
| 1919 | ATOM | 1919 | HE2  | PHE | P | 121 | 7.046 | -10.576 | 4.912  | 0.00 | 0.00 | PROA |
| 1920 | ATOM | 1920 | C    | PHE | P | 121 | 4.255 | -15.711 | 4.170  | 0.00 | 0.00 | PROA |
| 1921 | ATOM | 1921 | O    | PHE | P | 121 | 4.535 | -16.923 | 4.242  | 0.00 | 0.00 | PROA |
| 1922 | ATOM | 1922 | N    | VAL | P | 122 | 4.209 | -15.064 | 3.010  | 0.00 | 0.00 | PROA |
| 1923 | ATOM | 1923 | HN   | VAL | P | 122 | 4.065 | -14.087 | 2.875  | 0.00 | 0.00 | PROA |
| 1924 | ATOM | 1924 | CA   | VAL | P | 122 | 4.159 | -15.828 | 1.795  | 0.00 | 0.00 | PROA |
| 1925 | ATOM | 1925 | HA   | VAL | P | 122 | 4.544 | -16.835 | 1.855  | 0.00 | 0.00 | PROA |
| 1926 | ATOM | 1926 | CB   | VAL | P | 122 | 2.803 | -15.813 | 1.176  | 0.00 | 0.00 | PROA |
| 1927 | ATOM | 1927 | HB   | VAL | P | 122 | 2.862 | -16.246 | 0.155  | 0.00 | 0.00 | PROA |
| 1928 | ATOM | 1928 | CG1  | VAL | P | 122 | 1.799 | -16.692 | 1.898  | 0.00 | 0.00 | PROA |
| 1929 | ATOM | 1929 | HG11 | VAL | P | 122 | 2.169 | -17.735 | 1.799  | 0.00 | 0.00 | PROA |
| 1930 | ATOM | 1930 | HG12 | VAL | P | 122 | 0.774 | -16.738 | 1.473  | 0.00 | 0.00 | PROA |
| 1931 | ATOM | 1931 | HG13 | VAL | P | 122 | 1.765 | -16.405 | 2.971  | 0.00 | 0.00 | PROA |
| 1932 | ATOM | 1932 | CG2  | VAL | P | 122 | 2.334 | -14.345 | 1.031  | 0.00 | 0.00 | PROA |
| 1933 | ATOM | 1933 | HG21 | VAL | P | 122 | 1.415 | -14.321 | 0.407  | 0.00 | 0.00 | PROA |
| 1934 | ATOM | 1934 | HG22 | VAL | P | 122 | 3.082 | -13.831 | 0.390  | 0.00 | 0.00 | PROA |
| 1935 | ATOM | 1935 | HG23 | VAL | P | 122 | 2.091 | -13.808 | 1.973  | 0.00 | 0.00 | PROA |
| 1936 | ATOM | 1936 | C    | VAL | P | 122 | 5.059 | -15.167 | 0.730  | 0.00 | 0.00 | PROA |
| 1937 | ATOM | 1937 | O    | VAL | P | 122 | 5.567 | -14.092 | 1.017  | 0.00 | 0.00 | PROA |
| 1938 | ATOM | 1938 | N    | VAL | P | 123 | 5.406 | -15.924 | -0.275 | 0.00 | 0.00 | PROA |
| 1939 | ATOM | 1939 | HN   | VAL | P | 123 | 4.994 | -16.813 | -0.457 | 0.00 | 0.00 | PROA |
| 1940 | ATOM | 1940 | CA   | VAL | P | 123 | 6.430 | -15.580 | -1.235 | 0.00 | 0.00 | PROA |
| 1941 | ATOM | 1941 | HA   | VAL | P | 123 | 6.900 | -14.618 | -1.095 | 0.00 | 0.00 | PROA |
| 1942 | ATOM | 1942 | CB   | VAL | P | 123 | 7.543 | -16.647 | -1.282 | 0.00 | 0.00 | PROA |
| 1943 | ATOM | 1943 | HB   | VAL | P | 123 | 7.141 | -17.646 | -1.554 | 0.00 | 0.00 | PROA |
| 1944 | ATOM | 1944 | CG1  | VAL | P | 123 | 8.717 | -16.305 | -2.227 | 0.00 | 0.00 | PROA |
| 1945 | ATOM | 1945 | HG11 | VAL | P | 123 | 8.451 | -16.320 | -3.305 | 0.00 | 0.00 | PROA |
| 1946 | ATOM | 1946 | HG12 | VAL | P | 123 | 9.641 | -16.895 | -2.049 | 0.00 | 0.00 | PROA |
| 1947 | ATOM | 1947 | HG13 | VAL | P | 123 | 9.040 | -15.251 | -2.092 | 0.00 | 0.00 | PROA |
| 1948 | ATOM | 1948 | CG2  | VAL | P | 123 | 8.146 | -16.731 | 0.177  | 0.00 | 0.00 | PROA |
| 1949 | ATOM | 1949 | HG21 | VAL | P | 123 | 8.443 | -15.698 | 0.459  | 0.00 | 0.00 | PROA |
| 1950 | ATOM | 1950 | HG22 | VAL | P | 123 | 8.896 | -17.549 | 0.218  | 0.00 | 0.00 | PROA |
| 1951 | ATOM | 1951 | HG23 | VAL | P | 123 | 7.327 | -17.040 | 0.861  | 0.00 | 0.00 | PROA |
| 1952 | ATOM | 1952 | C    | VAL | P | 123 | 5.872 | -15.505 | -2.713 | 0.00 | 0.00 | PROA |
| 1953 | ATOM | 1953 | O    | VAL | P | 123 | 5.443 | -16.469 | -3.291 | 0.00 | 0.00 | PROA |
| 1954 | ATOM | 1954 | N    | ALA | P | 124 | 5.956 | -14.321 | -3.365 | 0.00 | 0.00 | PROA |
| 1955 | ATOM | 1955 | HN   | ALA | P | 124 | 6.412 | -13.549 | -2.929 | 0.00 | 0.00 | PROA |
| 1956 | ATOM | 1956 | CA   | ALA | P | 124 | 5.730 | -14.256 | -4.817 | 0.00 | 0.00 | PROA |
| 1957 | ATOM | 1957 | HA   | ALA | P | 124 | 5.013 | -14.998 | -5.135 | 0.00 | 0.00 | PROA |
| 1958 | ATOM | 1958 | CB   | ALA | P | 124 | 4.967 | -12.979 | -5.153 | 0.00 | 0.00 | PROA |
| 1959 | ATOM | 1959 | HB1  | ALA | P | 124 | 4.582 | -12.935 | -6.194 | 0.00 | 0.00 | PROA |
| 1960 | ATOM | 1960 | HB2  | ALA | P | 124 | 5.641 | -12.101 | -5.056 | 0.00 | 0.00 | PROA |
| 1961 | ATOM | 1961 | HB3  | ALA | P | 124 | 4.227 | -12.863 | -4.332 | 0.00 | 0.00 | PROA |
| 1962 | ATOM | 1962 | C    | ALA | P | 124 | 7.029 | -14.375 | -5.602 | 0.00 | 0.00 | PROA |
| 1963 | ATOM | 1963 | O    | ALA | P | 124 | 7.932 | -13.531 | -5.576 | 0.00 | 0.00 | PROA |
| 1964 | ATOM | 1964 | N    | ILE | P | 125 | 7.102 | -15.407 | -6.437 | 0.00 | 0.00 | PROA |
| 1965 | ATOM | 1965 | HN   | ILE | P | 125 | 6.289 | -15.971 | -6.558 | 0.00 | 0.00 | PROA |
| 1966 | ATOM | 1966 | CA   | ILE | P | 125 | 8.209 | -15.720 | -7.249 | 0.00 | 0.00 | PROA |
| 1967 | ATOM | 1967 | HA   | ILE | P | 125 | 9.083 | -15.235 | -6.840 | 0.00 | 0.00 | PROA |
| 1968 | ATOM | 1968 | CB   | ILE | P | 125 | 8.438 | -17.223 | -7.390 | 0.00 | 0.00 | PROA |
| 1969 | ATOM | 1969 | HB   | ILE | P | 125 | 7.615 | -17.709 | -7.956 | 0.00 | 0.00 | PROA |
| 1970 | ATOM | 1970 | CG2  | ILE | P | 125 | 9.661 | -17.491 | -8.260 | 0.00 | 0.00 | PROA |
| 1971 | ATOM | 1971 | HG21 | ILE | P | 125 | 9.927 | -18.556 | -8.095 | 0.00 | 0.00 | PROA |

|      |      |      |      |     |   |     |        |         |         |      |      |      |
|------|------|------|------|-----|---|-----|--------|---------|---------|------|------|------|
| 1972 | ATOM | 1972 | HG22 | ILE | P | 125 | 10.482 | -16.770 | -8.056  | 0.00 | 0.00 | PROA |
| 1973 | ATOM | 1973 | HG23 | ILE | P | 125 | 9.416  | -17.406 | -9.341  | 0.00 | 0.00 | PROA |
| 1974 | ATOM | 1974 | CG1  | ILE | P | 125 | 8.502  | -17.863 | -5.992  | 0.00 | 0.00 | PROA |
| 1975 | ATOM | 1975 | HG11 | ILE | P | 125 | 8.213  | -18.935 | -5.994  | 0.00 | 0.00 | PROA |
| 1976 | ATOM | 1976 | HG12 | ILE | P | 125 | 7.832  | -17.414 | -5.228  | 0.00 | 0.00 | PROA |
| 1977 | ATOM | 1977 | CD   | ILE | P | 125 | 9.999  | -17.845 | -5.425  | 0.00 | 0.00 | PROA |
| 1978 | ATOM | 1978 | HD1  | ILE | P | 125 | 9.885  | -18.401 | -4.470  | 0.00 | 0.00 | PROA |
| 1979 | ATOM | 1979 | HD2  | ILE | P | 125 | 10.289 | -16.788 | -5.244  | 0.00 | 0.00 | PROA |
| 1980 | ATOM | 1980 | HD3  | ILE | P | 125 | 10.810 | -18.331 | -6.009  | 0.00 | 0.00 | PROA |
| 1981 | ATOM | 1981 | C    | ILE | P | 125 | 7.875  | -15.164 | -8.732  | 0.00 | 0.00 | PROA |
| 1982 | ATOM | 1982 | O    | ILE | P | 125 | 6.819  | -15.507 | -9.350  | 0.00 | 0.00 | PROA |
| 1983 | ATOM | 1983 | N    | GLY | P | 126 | 8.734  | -14.363 | -9.359  | 0.00 | 0.00 | PROA |
| 1984 | ATOM | 1984 | HN   | GLY | P | 126 | 9.521  | -14.063 | -8.826  | 0.00 | 0.00 | PROA |
| 1985 | ATOM | 1985 | CA   | GLY | P | 126 | 8.677  | -14.074 | -10.764 | 0.00 | 0.00 | PROA |
| 1986 | ATOM | 1986 | HA1  | GLY | P | 126 | 8.770  | -13.022 | -10.990 | 0.00 | 0.00 | PROA |
| 1987 | ATOM | 1987 | HA2  | GLY | P | 126 | 7.735  | -14.423 | -11.162 | 0.00 | 0.00 | PROA |
| 1988 | ATOM | 1988 | C    | GLY | P | 126 | 9.667  | -14.899 | -11.552 | 0.00 | 0.00 | PROA |
| 1989 | ATOM | 1989 | O    | GLY | P | 126 | 9.479  | -15.494 | -12.615 | 0.00 | 0.00 | PROA |
| 1990 | ATOM | 1990 | N    | SER | P | 127 | 10.860 | -15.015 | -10.898 | 0.00 | 0.00 | PROA |
| 1991 | ATOM | 1991 | HN   | SER | P | 127 | 10.937 | -14.513 | -10.040 | 0.00 | 0.00 | PROA |
| 1992 | ATOM | 1992 | CA   | SER | P | 127 | 11.915 | -15.914 | -11.336 | 0.00 | 0.00 | PROA |
| 1993 | ATOM | 1993 | HA   | SER | P | 127 | 11.534 | -16.783 | -11.853 | 0.00 | 0.00 | PROA |
| 1994 | ATOM | 1994 | CB   | SER | P | 127 | 12.920 | -15.151 | -12.261 | 0.00 | 0.00 | PROA |
| 1995 | ATOM | 1995 | HB1  | SER | P | 127 | 13.221 | -14.269 | -11.656 | 0.00 | 0.00 | PROA |
| 1996 | ATOM | 1996 | HB2  | SER | P | 127 | 12.409 | -14.771 | -13.171 | 0.00 | 0.00 | PROA |
| 1997 | ATOM | 1997 | OG   | SER | P | 127 | 14.028 | -15.975 | -12.686 | 0.00 | 0.00 | PROA |
| 1998 | ATOM | 1998 | HG1  | SER | P | 127 | 13.699 | -16.572 | -13.362 | 0.00 | 0.00 | PROA |
| 1999 | ATOM | 1999 | C    | SER | P | 127 | 12.767 | -16.478 | -10.225 | 0.00 | 0.00 | PROA |
| 2000 | ATOM | 2000 | O    | SER | P | 127 | 13.005 | -15.675 | -9.331  | 0.00 | 0.00 | PROA |
| 2001 | ATOM | 2001 | N    | PRO | P | 128 | 13.088 | -17.749 | -10.057 | 0.00 | 0.00 | PROA |
| 2002 | ATOM | 2002 | CD   | PRO | P | 128 | 12.591 | -18.840 | -10.916 | 0.00 | 0.00 | PROA |
| 2003 | ATOM | 2003 | HD1  | PRO | P | 128 | 13.259 | -18.974 | -11.793 | 0.00 | 0.00 | PROA |
| 2004 | ATOM | 2004 | HD2  | PRO | P | 128 | 11.554 | -18.657 | -11.273 | 0.00 | 0.00 | PROA |
| 2005 | ATOM | 2005 | CA   | PRO | P | 128 | 13.804 | -18.174 | -8.919  | 0.00 | 0.00 | PROA |
| 2006 | ATOM | 2006 | HA   | PRO | P | 128 | 13.379 | -17.782 | -8.006  | 0.00 | 0.00 | PROA |
| 2007 | ATOM | 2007 | CB   | PRO | P | 128 | 13.695 | -19.718 | -8.977  | 0.00 | 0.00 | PROA |
| 2008 | ATOM | 2008 | HB1  | PRO | P | 128 | 13.377 | -20.078 | -7.975  | 0.00 | 0.00 | PROA |
| 2009 | ATOM | 2009 | HB2  | PRO | P | 128 | 14.643 | -20.175 | -9.331  | 0.00 | 0.00 | PROA |
| 2010 | ATOM | 2010 | CG   | PRO | P | 128 | 12.639 | -20.082 | -10.036 | 0.00 | 0.00 | PROA |
| 2011 | ATOM | 2011 | HG1  | PRO | P | 128 | 12.889 | -20.908 | -10.736 | 0.00 | 0.00 | PROA |
| 2012 | ATOM | 2012 | HG2  | PRO | P | 128 | 11.671 | -20.236 | -9.513  | 0.00 | 0.00 | PROA |
| 2013 | ATOM | 2013 | C    | PRO | P | 128 | 15.333 | -17.760 | -9.070  | 0.00 | 0.00 | PROA |
| 2014 | ATOM | 2014 | O    | PRO | P | 128 | 16.149 | -18.103 | -8.216  | 0.00 | 0.00 | PROA |
| 2015 | ATOM | 2015 | N    | PHE | P | 129 | 15.661 | -17.042 | -10.108 | 0.00 | 0.00 | PROA |
| 2016 | ATOM | 2016 | HN   | PHE | P | 129 | 15.088 | -16.704 | -10.850 | 0.00 | 0.00 | PROA |
| 2017 | ATOM | 2017 | CA   | PHE | P | 129 | 17.020 | -16.734 | -10.546 | 0.00 | 0.00 | PROA |
| 2018 | ATOM | 2018 | HA   | PHE | P | 129 | 17.749 | -17.045 | -9.813  | 0.00 | 0.00 | PROA |
| 2019 | ATOM | 2019 | CB   | PHE | P | 129 | 17.193 | -17.501 | -11.870 | 0.00 | 0.00 | PROA |
| 2020 | ATOM | 2020 | HB1  | PHE | P | 129 | 18.248 | -17.458 | -12.215 | 0.00 | 0.00 | PROA |
| 2021 | ATOM | 2021 | HB2  | PHE | P | 129 | 16.697 | -17.123 | -12.789 | 0.00 | 0.00 | PROA |
| 2022 | ATOM | 2022 | CG   | PHE | P | 129 | 16.949 | -19.011 | -11.844 | 0.00 | 0.00 | PROA |
| 2023 | ATOM | 2023 | CD1  | PHE | P | 129 | 16.029 | -19.533 | -12.720 | 0.00 | 0.00 | PROA |
| 2024 | ATOM | 2024 | HD1  | PHE | P | 129 | 15.458 | -19.071 | -13.512 | 0.00 | 0.00 | PROA |
| 2025 | ATOM | 2025 | CE1  | PHE | P | 129 | 15.643 | -20.862 | -12.469 | 0.00 | 0.00 | PROA |
| 2026 | ATOM | 2026 | HE1  | PHE | P | 129 | 14.832 | -21.229 | -13.081 | 0.00 | 0.00 | PROA |
| 2027 | ATOM | 2027 | CZ   | PHE | P | 129 | 16.275 | -21.635 | -11.544 | 0.00 | 0.00 | PROA |
| 2028 | ATOM | 2028 | HZ   | PHE | P | 129 | 16.079 | -22.695 | -11.480 | 0.00 | 0.00 | PROA |
| 2029 | ATOM | 2029 | CD2  | PHE | P | 129 | 17.599 | -19.790 | -10.809 | 0.00 | 0.00 | PROA |
| 2030 | ATOM | 2030 | HD2  | PHE | P | 129 | 18.225 | -19.256 | -10.109 | 0.00 | 0.00 | PROA |
| 2031 | ATOM | 2031 | CE2  | PHE | P | 129 | 17.196 | -21.148 | -10.648 | 0.00 | 0.00 | PROA |
| 2032 | ATOM | 2032 | HE2  | PHE | P | 129 | 17.588 | -21.807 | -9.889  | 0.00 | 0.00 | PROA |
| 2033 | ATOM | 2033 | C    | PHE | P | 129 | 17.192 | -15.249 | -10.685 | 0.00 | 0.00 | PROA |
| 2034 | ATOM | 2034 | O    | PHE | P | 129 | 17.807 | -14.591 | -9.852  | 0.00 | 0.00 | PROA |
| 2035 | ATOM | 2035 | N    | SER | P | 130 | 16.691 | -14.714 | -11.719 | 0.00 | 0.00 | PROA |
| 2036 | ATOM | 2036 | HN   | SER | P | 130 | 16.274 | -15.173 | -12.499 | 0.00 | 0.00 | PROA |
| 2037 | ATOM | 2037 | CA   | SER | P | 130 | 16.889 | -13.293 | -12.236 | 0.00 | 0.00 | PROA |
| 2038 | ATOM | 2038 | HA   | SER | P | 130 | 17.897 | -13.241 | -12.619 | 0.00 | 0.00 | PROA |
| 2039 | ATOM | 2039 | CB   | SER | P | 130 | 16.013 | -12.986 | -13.484 | 0.00 | 0.00 | PROA |
| 2040 | ATOM | 2040 | HB1  | SER | P | 130 | 14.955 | -13.125 | -13.177 | 0.00 | 0.00 | PROA |
| 2041 | ATOM | 2041 | HB2  | SER | P | 130 | 16.230 | -13.780 | -14.229 | 0.00 | 0.00 | PROA |
| 2042 | ATOM | 2042 | OG   | SER | P | 130 | 16.166 | -11.604 | -13.946 | 0.00 | 0.00 | PROA |
| 2043 | ATOM | 2043 | HG1  | SER | P | 130 | 16.435 | -11.625 | -14.867 | 0.00 | 0.00 | PROA |
| 2044 | ATOM | 2044 | C    | SER | P | 130 | 16.714 | -12.218 | -11.170 | 0.00 | 0.00 | PROA |

|      |      |      |      |     |   |     |        |         |         |      |      |      |
|------|------|------|------|-----|---|-----|--------|---------|---------|------|------|------|
| 2045 | ATOM | 2045 | O    | SER | P | 130 | 15.708 | -12.078 | -10.519 | 0.00 | 0.00 | PROA |
| 2046 | ATOM | 2046 | N    | LEU | P | 131 | 17.752 | -11.276 | -11.090 | 0.00 | 0.00 | PROA |
| 2047 | ATOM | 2047 | HN   | LEU | P | 131 | 18.598 | -11.477 | -11.578 | 0.00 | 0.00 | PROA |
| 2048 | ATOM | 2048 | CA   | LEU | P | 131 | 17.723 | -10.081 | -10.286 | 0.00 | 0.00 | PROA |
| 2049 | ATOM | 2049 | HA   | LEU | P | 131 | 17.142 | -10.239 | -9.390  | 0.00 | 0.00 | PROA |
| 2050 | ATOM | 2050 | CB   | LEU | P | 131 | 19.042 | -9.761  | -9.757  | 0.00 | 0.00 | PROA |
| 2051 | ATOM | 2051 | HB1  | LEU | P | 131 | 18.943 | -9.037  | -8.920  | 0.00 | 0.00 | PROA |
| 2052 | ATOM | 2052 | HB2  | LEU | P | 131 | 19.807 | -9.359  | -10.456 | 0.00 | 0.00 | PROA |
| 2053 | ATOM | 2053 | CG   | LEU | P | 131 | 19.799 | -10.929 | -9.214  | 0.00 | 0.00 | PROA |
| 2054 | ATOM | 2054 | HG   | LEU | P | 131 | 19.888 | -11.649 | -10.054 | 0.00 | 0.00 | PROA |
| 2055 | ATOM | 2055 | CD1  | LEU | P | 131 | 21.258 | -10.428 | -8.793  | 0.00 | 0.00 | PROA |
| 2056 | ATOM | 2056 | HD11 | LEU | P | 131 | 21.845 | -11.302 | -8.440  | 0.00 | 0.00 | PROA |
| 2057 | ATOM | 2057 | HD12 | LEU | P | 131 | 21.197 | -9.718  | -7.941  | 0.00 | 0.00 | PROA |
| 2058 | ATOM | 2058 | HD13 | LEU | P | 131 | 21.718 | -9.869  | -9.636  | 0.00 | 0.00 | PROA |
| 2059 | ATOM | 2059 | CD2  | LEU | P | 131 | 19.028 | -11.588 | -7.964  | 0.00 | 0.00 | PROA |
| 2060 | ATOM | 2060 | HD21 | LEU | P | 131 | 18.881 | -10.898 | -7.106  | 0.00 | 0.00 | PROA |
| 2061 | ATOM | 2061 | HD22 | LEU | P | 131 | 19.534 | -12.538 | -7.690  | 0.00 | 0.00 | PROA |
| 2062 | ATOM | 2062 | HD23 | LEU | P | 131 | 18.034 | -11.914 | -8.340  | 0.00 | 0.00 | PROA |
| 2063 | ATOM | 2063 | C    | LEU | P | 131 | 17.152 | -8.886  | -10.913 | 0.00 | 0.00 | PROA |
| 2064 | ATOM | 2064 | O    | LEU | P | 131 | 17.202 | -7.761  | -10.420 | 0.00 | 0.00 | PROA |
| 2065 | ATOM | 2065 | N    | GLN | P | 132 | 16.426 | -9.072  | -12.086 | 0.00 | 0.00 | PROA |
| 2066 | ATOM | 2066 | HN   | GLN | P | 132 | 16.504 | -9.842  | -12.715 | 0.00 | 0.00 | PROA |
| 2067 | ATOM | 2067 | CA   | GLN | P | 132 | 15.559 | -8.034  | -12.663 | 0.00 | 0.00 | PROA |
| 2068 | ATOM | 2068 | HA   | GLN | P | 132 | 15.693 | -7.072  | -12.191 | 0.00 | 0.00 | PROA |
| 2069 | ATOM | 2069 | CB   | GLN | P | 132 | 15.815 | -7.997  | -14.184 | 0.00 | 0.00 | PROA |
| 2070 | ATOM | 2070 | HB1  | GLN | P | 132 | 15.154 | -7.192  | -14.570 | 0.00 | 0.00 | PROA |
| 2071 | ATOM | 2071 | HB2  | GLN | P | 132 | 15.483 | -8.966  | -14.614 | 0.00 | 0.00 | PROA |
| 2072 | ATOM | 2072 | CG   | GLN | P | 132 | 17.296 | -7.674  | -14.547 | 0.00 | 0.00 | PROA |
| 2073 | ATOM | 2073 | HG1  | GLN | P | 132 | 17.193 | -7.321  | -15.596 | 0.00 | 0.00 | PROA |
| 2074 | ATOM | 2074 | HG2  | GLN | P | 132 | 18.000 | -8.529  | -14.463 | 0.00 | 0.00 | PROA |
| 2075 | ATOM | 2075 | CD   | GLN | P | 132 | 17.997 | -6.526  | -13.886 | 0.00 | 0.00 | PROA |
| 2076 | ATOM | 2076 | OE1  | GLN | P | 132 | 17.504 | -5.806  | -13.067 | 0.00 | 0.00 | PROA |
| 2077 | ATOM | 2077 | NE2  | GLN | P | 132 | 19.272 | -6.251  | -14.258 | 0.00 | 0.00 | PROA |
| 2078 | ATOM | 2078 | HE21 | GLN | P | 132 | 19.547 | -5.439  | -13.743 | 0.00 | 0.00 | PROA |
| 2079 | ATOM | 2079 | HE22 | GLN | P | 132 | 19.712 | -6.763  | -14.996 | 0.00 | 0.00 | PROA |
| 2080 | ATOM | 2080 | C    | GLN | P | 132 | 14.075 | -8.356  | -12.328 | 0.00 | 0.00 | PROA |
| 2081 | ATOM | 2081 | O    | GLN | P | 132 | 13.230 | -7.454  | -12.478 | 0.00 | 0.00 | PROA |
| 2082 | ATOM | 2082 | N    | ASN | P | 133 | 13.861 | -9.556  | -11.750 | 0.00 | 0.00 | PROA |
| 2083 | ATOM | 2083 | HN   | ASN | P | 133 | 14.599 | -10.221 | -11.671 | 0.00 | 0.00 | PROA |
| 2084 | ATOM | 2084 | CA   | ASN | P | 133 | 12.548 | -9.929  | -11.338 | 0.00 | 0.00 | PROA |
| 2085 | ATOM | 2085 | HA   | ASN | P | 133 | 11.790 | -9.168  | -11.231 | 0.00 | 0.00 | PROA |
| 2086 | ATOM | 2086 | CB   | ASN | P | 133 | 12.088 | -11.092 | -12.300 | 0.00 | 0.00 | PROA |
| 2087 | ATOM | 2087 | HB1  | ASN | P | 133 | 11.126 | -11.571 | -12.020 | 0.00 | 0.00 | PROA |
| 2088 | ATOM | 2088 | HB2  | ASN | P | 133 | 12.862 | -11.875 | -12.149 | 0.00 | 0.00 | PROA |
| 2089 | ATOM | 2089 | CG   | ASN | P | 133 | 12.079 | -10.523 | -13.738 | 0.00 | 0.00 | PROA |
| 2090 | ATOM | 2090 | OD1  | ASN | P | 133 | 12.732 | -10.947 | -14.669 | 0.00 | 0.00 | PROA |
| 2091 | ATOM | 2091 | ND2  | ASN | P | 133 | 11.262 | -9.405  | -13.893 | 0.00 | 0.00 | PROA |
| 2092 | ATOM | 2092 | HD21 | ASN | P | 133 | 10.845 | -9.051  | -13.056 | 0.00 | 0.00 | PROA |
| 2093 | ATOM | 2093 | HD22 | ASN | P | 133 | 10.767 | -9.276  | -14.752 | 0.00 | 0.00 | PROA |
| 2094 | ATOM | 2094 | C    | ASN | P | 133 | 12.735 | -10.533 | -9.877  | 0.00 | 0.00 | PROA |
| 2095 | ATOM | 2095 | O    | ASN | P | 133 | 12.328 | -11.639 | -9.581  | 0.00 | 0.00 | PROA |
| 2096 | ATOM | 2096 | N    | THR | P | 134 | 13.261 | -9.710  | -8.955  | 0.00 | 0.00 | PROA |
| 2097 | ATOM | 2097 | HN   | THR | P | 134 | 13.645 | -8.849  | -9.280  | 0.00 | 0.00 | PROA |
| 2098 | ATOM | 2098 | CA   | THR | P | 134 | 13.402 | -9.923  | -7.545  | 0.00 | 0.00 | PROA |
| 2099 | ATOM | 2099 | HA   | THR | P | 134 | 14.014 | -10.791 | -7.349  | 0.00 | 0.00 | PROA |
| 2100 | ATOM | 2100 | CB   | THR | P | 134 | 14.052 | -8.786  | -6.664  | 0.00 | 0.00 | PROA |
| 2101 | ATOM | 2101 | HB   | THR | P | 134 | 13.990 | -8.981  | -5.572  | 0.00 | 0.00 | PROA |
| 2102 | ATOM | 2102 | OG1  | THR | P | 134 | 13.660 | -7.504  | -6.998  | 0.00 | 0.00 | PROA |
| 2103 | ATOM | 2103 | HG1  | THR | P | 134 | 12.718 | -7.414  | -6.841  | 0.00 | 0.00 | PROA |
| 2104 | ATOM | 2104 | CG2  | THR | P | 134 | 15.525 | -8.810  | -7.053  | 0.00 | 0.00 | PROA |
| 2105 | ATOM | 2105 | HG21 | THR | P | 134 | 15.975 | -7.823  | -6.811  | 0.00 | 0.00 | PROA |
| 2106 | ATOM | 2106 | HG22 | THR | P | 134 | 15.640 | -8.995  | -8.142  | 0.00 | 0.00 | PROA |
| 2107 | ATOM | 2107 | HG23 | THR | P | 134 | 16.012 | -9.613  | -6.459  | 0.00 | 0.00 | PROA |
| 2108 | ATOM | 2108 | C    | THR | P | 134 | 11.980 | -10.135 | -6.960  | 0.00 | 0.00 | PROA |
| 2109 | ATOM | 2109 | O    | THR | P | 134 | 10.986 | -9.567  | -7.448  | 0.00 | 0.00 | PROA |
| 2110 | ATOM | 2110 | N    | VAL | P | 135 | 11.913 | -10.872 | -5.856  | 0.00 | 0.00 | PROA |
| 2111 | ATOM | 2111 | HN   | VAL | P | 135 | 12.762 | -11.245 | -5.490  | 0.00 | 0.00 | PROA |
| 2112 | ATOM | 2112 | CA   | VAL | P | 135 | 10.783 | -11.296 | -5.076  | 0.00 | 0.00 | PROA |
| 2113 | ATOM | 2113 | HA   | VAL | P | 135 | 10.021 | -11.644 | -5.758  | 0.00 | 0.00 | PROA |
| 2114 | ATOM | 2114 | CB   | VAL | P | 135 | 11.157 | -12.384 | -4.177  | 0.00 | 0.00 | PROA |
| 2115 | ATOM | 2115 | HB   | VAL | P | 135 | 12.074 | -12.123 | -3.607  | 0.00 | 0.00 | PROA |
| 2116 | ATOM | 2116 | CG1  | VAL | P | 135 | 10.166 | -12.717 | -3.057  | 0.00 | 0.00 | PROA |
| 2117 | ATOM | 2117 | HG11 | VAL | P | 135 | 9.188  | -13.024 | -3.484  | 0.00 | 0.00 | PROA |

|      |      |      |      |     |   |     |        |         |        |      |      |      |
|------|------|------|------|-----|---|-----|--------|---------|--------|------|------|------|
| 2118 | ATOM | 2118 | HG12 | VAL | P | 135 | 9.990  | -11.879 | -2.349 | 0.00 | 0.00 | PROA |
| 2119 | ATOM | 2119 | HG13 | VAL | P | 135 | 10.476 | -13.504 | -2.336 | 0.00 | 0.00 | PROA |
| 2120 | ATOM | 2120 | CG2  | VAL | P | 135 | 11.405 | -13.679 | -5.043 | 0.00 | 0.00 | PROA |
| 2121 | ATOM | 2121 | HG21 | VAL | P | 135 | 12.276 | -13.487 | -5.706 | 0.00 | 0.00 | PROA |
| 2122 | ATOM | 2122 | HG22 | VAL | P | 135 | 10.425 | -13.751 | -5.560 | 0.00 | 0.00 | PROA |
| 2123 | ATOM | 2123 | HG23 | VAL | P | 135 | 11.482 | -14.464 | -4.260 | 0.00 | 0.00 | PROA |
| 2124 | ATOM | 2124 | C    | VAL | P | 135 | 10.000 | -10.170 | -4.352 | 0.00 | 0.00 | PROA |
| 2125 | ATOM | 2125 | O    | VAL | P | 135 | 10.534 | -9.223  | -3.805 | 0.00 | 0.00 | PROA |
| 2126 | ATOM | 2126 | N    | THR | P | 136 | 8.659  | -10.332 | -4.258 | 0.00 | 0.00 | PROA |
| 2127 | ATOM | 2127 | HN   | THR | P | 136 | 8.266  | -10.991 | -4.895 | 0.00 | 0.00 | PROA |
| 2128 | ATOM | 2128 | CA   | THR | P | 136 | 7.632  | -9.625  | -3.486 | 0.00 | 0.00 | PROA |
| 2129 | ATOM | 2129 | HA   | THR | P | 136 | 8.034  | -8.713  | -3.069 | 0.00 | 0.00 | PROA |
| 2130 | ATOM | 2130 | CB   | THR | P | 136 | 6.369  | -9.120  | -4.171 | 0.00 | 0.00 | PROA |
| 2131 | ATOM | 2131 | HB   | THR | P | 136 | 5.723  | -9.969  | -4.481 | 0.00 | 0.00 | PROA |
| 2132 | ATOM | 2132 | OG1  | THR | P | 136 | 6.745  | -8.384  | -5.321 | 0.00 | 0.00 | PROA |
| 2133 | ATOM | 2133 | HG1  | THR | P | 136 | 7.049  | -8.978  | -6.011 | 0.00 | 0.00 | PROA |
| 2134 | ATOM | 2134 | CG2  | THR | P | 136 | 5.643  | -8.132  | -3.232 | 0.00 | 0.00 | PROA |
| 2135 | ATOM | 2135 | HG21 | THR | P | 136 | 6.360  | -7.560  | -2.605 | 0.00 | 0.00 | PROA |
| 2136 | ATOM | 2136 | HG22 | THR | P | 136 | 4.817  | -8.638  | -2.688 | 0.00 | 0.00 | PROA |
| 2137 | ATOM | 2137 | HG23 | THR | P | 136 | 5.036  | -7.550  | -3.958 | 0.00 | 0.00 | PROA |
| 2138 | ATOM | 2138 | C    | THR | P | 136 | 7.210  | -10.539 | -2.388 | 0.00 | 0.00 | PROA |
| 2139 | ATOM | 2139 | O    | THR | P | 136 | 6.837  | -11.726 | -2.589 | 0.00 | 0.00 | PROA |
| 2140 | ATOM | 2140 | N    | THR | P | 137 | 7.302  | -10.048 | -1.088 | 0.00 | 0.00 | PROA |
| 2141 | ATOM | 2141 | HN   | THR | P | 137 | 7.686  | -9.167  | -0.823 | 0.00 | 0.00 | PROA |
| 2142 | ATOM | 2142 | CA   | THR | P | 137 | 7.020  | -10.983 | -0.030 | 0.00 | 0.00 | PROA |
| 2143 | ATOM | 2143 | HA   | THR | P | 137 | 6.164  | -11.550 | -0.364 | 0.00 | 0.00 | PROA |
| 2144 | ATOM | 2144 | CB   | THR | P | 137 | 8.089  | -11.981 | 0.403  | 0.00 | 0.00 | PROA |
| 2145 | ATOM | 2145 | HB   | THR | P | 137 | 8.392  | -12.605 | -0.465 | 0.00 | 0.00 | PROA |
| 2146 | ATOM | 2146 | OG1  | THR | P | 137 | 7.699  | -12.817 | 1.469  | 0.00 | 0.00 | PROA |
| 2147 | ATOM | 2147 | HG1  | THR | P | 137 | 6.812  | -13.108 | 1.246  | 0.00 | 0.00 | PROA |
| 2148 | ATOM | 2148 | CG2  | THR | P | 137 | 9.296  | -11.200 | 0.956  | 0.00 | 0.00 | PROA |
| 2149 | ATOM | 2149 | HG21 | THR | P | 137 | 10.190 | -11.834 | 1.135  | 0.00 | 0.00 | PROA |
| 2150 | ATOM | 2150 | HG22 | THR | P | 137 | 8.933  | -10.680 | 1.869  | 0.00 | 0.00 | PROA |
| 2151 | ATOM | 2151 | HG23 | THR | P | 137 | 9.466  | -10.379 | 0.227  | 0.00 | 0.00 | PROA |
| 2152 | ATOM | 2152 | C    | THR | P | 137 | 6.376  | -10.264 | 1.176  | 0.00 | 0.00 | PROA |
| 2153 | ATOM | 2153 | O    | THR | P | 137 | 6.689  | -9.096  | 1.445  | 0.00 | 0.00 | PROA |
| 2154 | ATOM | 2154 | N    | GLY | P | 138 | 5.348  | -10.888 | 1.762  | 0.00 | 0.00 | PROA |
| 2155 | ATOM | 2155 | HN   | GLY | P | 138 | 5.045  | -11.793 | 1.473  | 0.00 | 0.00 | PROA |
| 2156 | ATOM | 2156 | CA   | GLY | P | 138 | 4.624  | -10.120 | 2.741  | 0.00 | 0.00 | PROA |
| 2157 | ATOM | 2157 | HA1  | GLY | P | 138 | 4.001  | -9.340  | 2.329  | 0.00 | 0.00 | PROA |
| 2158 | ATOM | 2158 | HA2  | GLY | P | 138 | 5.295  | -9.788  | 3.520  | 0.00 | 0.00 | PROA |
| 2159 | ATOM | 2159 | C    | GLY | P | 138 | 3.680  | -11.097 | 3.361  | 0.00 | 0.00 | PROA |
| 2160 | ATOM | 2160 | O    | GLY | P | 138 | 3.521  | -12.190 | 2.831  | 0.00 | 0.00 | PROA |
| 2161 | ATOM | 2161 | N    | ILE | P | 139 | 3.023  | -10.674 | 4.430  | 0.00 | 0.00 | PROA |
| 2162 | ATOM | 2162 | HN   | ILE | P | 139 | 3.252  | -9.779  | 4.804  | 0.00 | 0.00 | PROA |
| 2163 | ATOM | 2163 | CA   | ILE | P | 139 | 1.913  | -11.441 | 4.971  | 0.00 | 0.00 | PROA |
| 2164 | ATOM | 2164 | HA   | ILE | P | 139 | 2.175  | -12.484 | 5.071  | 0.00 | 0.00 | PROA |
| 2165 | ATOM | 2165 | CB   | ILE | P | 139 | 1.530  | -11.022 | 6.412  | 0.00 | 0.00 | PROA |
| 2166 | ATOM | 2166 | HB   | ILE | P | 139 | 0.740  | -11.672 | 6.845  | 0.00 | 0.00 | PROA |
| 2167 | ATOM | 2167 | CG2  | ILE | P | 139 | 2.745  | -11.334 | 7.301  | 0.00 | 0.00 | PROA |
| 2168 | ATOM | 2168 | HG21 | ILE | P | 139 | 3.094  | -12.383 | 7.187  | 0.00 | 0.00 | PROA |
| 2169 | ATOM | 2169 | HG22 | ILE | P | 139 | 2.434  | -11.152 | 8.352  | 0.00 | 0.00 | PROA |
| 2170 | ATOM | 2170 | HG23 | ILE | P | 139 | 3.541  | -10.584 | 7.105  | 0.00 | 0.00 | PROA |
| 2171 | ATOM | 2171 | CG1  | ILE | P | 139 | 1.154  | -9.562  | 6.605  | 0.00 | 0.00 | PROA |
| 2172 | ATOM | 2172 | HG11 | ILE | P | 139 | 1.376  | -9.068  | 5.635  | 0.00 | 0.00 | PROA |
| 2173 | ATOM | 2173 | HG12 | ILE | P | 139 | 1.809  | -9.089  | 7.366  | 0.00 | 0.00 | PROA |
| 2174 | ATOM | 2174 | CD   | ILE | P | 139 | -0.278 | -9.433  | 6.969  | 0.00 | 0.00 | PROA |
| 2175 | ATOM | 2175 | HD1  | ILE | P | 139 | -0.890 | -9.793  | 6.114  | 0.00 | 0.00 | PROA |
| 2176 | ATOM | 2176 | HD2  | ILE | P | 139 | -0.497 | -8.379  | 7.242  | 0.00 | 0.00 | PROA |
| 2177 | ATOM | 2177 | HD3  | ILE | P | 139 | -0.522 | -10.038 | 7.868  | 0.00 | 0.00 | PROA |
| 2178 | ATOM | 2178 | C    | ILE | P | 139 | 0.589  | -11.447 | 4.072  | 0.00 | 0.00 | PROA |
| 2179 | ATOM | 2179 | O    | ILE | P | 139 | 0.323  | -10.463 | 3.451  | 0.00 | 0.00 | PROA |
| 2180 | ATOM | 2180 | N    | VAL | P | 140 | -0.273 | -12.473 | 4.079  | 0.00 | 0.00 | PROA |
| 2181 | ATOM | 2181 | HN   | VAL | P | 140 | 0.091  | -13.332 | 4.430  | 0.00 | 0.00 | PROA |
| 2182 | ATOM | 2182 | CA   | VAL | P | 140 | -1.589 | -12.400 | 3.493  | 0.00 | 0.00 | PROA |
| 2183 | ATOM | 2183 | HA   | VAL | P | 140 | -1.511 | -11.814 | 2.589  | 0.00 | 0.00 | PROA |
| 2184 | ATOM | 2184 | CB   | VAL | P | 140 | -2.139 | -13.822 | 3.246  | 0.00 | 0.00 | PROA |
| 2185 | ATOM | 2185 | HB   | VAL | P | 140 | -1.962 | -14.451 | 4.145  | 0.00 | 0.00 | PROA |
| 2186 | ATOM | 2186 | CG1  | VAL | P | 140 | -3.603 | -13.769 | 2.690  | 0.00 | 0.00 | PROA |
| 2187 | ATOM | 2187 | HG11 | VAL | P | 140 | -3.816 | -14.687 | 2.102  | 0.00 | 0.00 | PROA |
| 2188 | ATOM | 2188 | HG12 | VAL | P | 140 | -3.716 | -12.928 | 1.973  | 0.00 | 0.00 | PROA |
| 2189 | ATOM | 2189 | HG13 | VAL | P | 140 | -4.406 | -13.689 | 3.454  | 0.00 | 0.00 | PROA |
| 2190 | ATOM | 2190 | CG2  | VAL | P | 140 | -1.176 | -14.484 | 2.182  | 0.00 | 0.00 | PROA |

|      |      |      |      |     |   |     |         |         |        |      |      |      |
|------|------|------|------|-----|---|-----|---------|---------|--------|------|------|------|
| 2191 | ATOM | 2191 | HG21 | VAL | P | 140 | -1.399  | -15.557 | 1.998  | 0.00 | 0.00 | PROA |
| 2192 | ATOM | 2192 | HG22 | VAL | P | 140 | -0.112  | -14.446 | 2.499  | 0.00 | 0.00 | PROA |
| 2193 | ATOM | 2193 | HG23 | VAL | P | 140 | -1.274  | -14.000 | 1.187  | 0.00 | 0.00 | PROA |
| 2194 | ATOM | 2194 | C    | VAL | P | 140 | -2.495  | -11.676 | 4.430  | 0.00 | 0.00 | PROA |
| 2195 | ATOM | 2195 | O    | VAL | P | 140 | -2.630  | -11.982 | 5.587  | 0.00 | 0.00 | PROA |
| 2196 | ATOM | 2196 | N    | SER | P | 141 | -3.100  | -10.540 | 3.915  | 0.00 | 0.00 | PROA |
| 2197 | ATOM | 2197 | HN   | SER | P | 141 | -3.037  | -10.247 | 2.964  | 0.00 | 0.00 | PROA |
| 2198 | ATOM | 2198 | CA   | SER | P | 141 | -4.063  | -9.724  | 4.734  | 0.00 | 0.00 | PROA |
| 2199 | ATOM | 2199 | HA   | SER | P | 141 | -3.911  | -9.889  | 5.790  | 0.00 | 0.00 | PROA |
| 2200 | ATOM | 2200 | CB   | SER | P | 141 | -3.759  | -8.263  | 4.411  | 0.00 | 0.00 | PROA |
| 2201 | ATOM | 2201 | HB1  | SER | P | 141 | -2.666  | -8.167  | 4.588  | 0.00 | 0.00 | PROA |
| 2202 | ATOM | 2202 | HB2  | SER | P | 141 | -4.303  | -7.725  | 5.217  | 0.00 | 0.00 | PROA |
| 2203 | ATOM | 2203 | OG   | SER | P | 141 | -4.138  | -7.874  | 3.122  | 0.00 | 0.00 | PROA |
| 2204 | ATOM | 2204 | HG1  | SER | P | 141 | -3.635  | -8.246  | 2.394  | 0.00 | 0.00 | PROA |
| 2205 | ATOM | 2205 | C    | SER | P | 141 | -5.465  | -10.111 | 4.418  | 0.00 | 0.00 | PROA |
| 2206 | ATOM | 2206 | O    | SER | P | 141 | -6.318  | -10.030 | 5.331  | 0.00 | 0.00 | PROA |
| 2207 | ATOM | 2207 | N    | THR | P | 142 | -5.750  | -10.583 | 3.254  | 0.00 | 0.00 | PROA |
| 2208 | ATOM | 2208 | HN   | THR | P | 142 | -5.072  | -10.482 | 2.530  | 0.00 | 0.00 | PROA |
| 2209 | ATOM | 2209 | CA   | THR | P | 142 | -7.178  | -10.959 | 3.014  | 0.00 | 0.00 | PROA |
| 2210 | ATOM | 2210 | HA   | THR | P | 142 | -7.643  | -11.457 | 3.852  | 0.00 | 0.00 | PROA |
| 2211 | ATOM | 2211 | CB   | THR | P | 142 | -8.227  | -9.817  | 2.801  | 0.00 | 0.00 | PROA |
| 2212 | ATOM | 2212 | HB   | THR | P | 142 | -8.203  | -9.302  | 3.785  | 0.00 | 0.00 | PROA |
| 2213 | ATOM | 2213 | OG1  | THR | P | 142 | -9.552  | -10.366 | 2.710  | 0.00 | 0.00 | PROA |
| 2214 | ATOM | 2214 | HG1  | THR | P | 142 | -10.150 | -9.619  | 2.785  | 0.00 | 0.00 | PROA |
| 2215 | ATOM | 2215 | CG2  | THR | P | 142 | -7.978  | -8.835  | 1.629  | 0.00 | 0.00 | PROA |
| 2216 | ATOM | 2216 | HG21 | THR | P | 142 | -8.702  | -7.994  | 1.580  | 0.00 | 0.00 | PROA |
| 2217 | ATOM | 2217 | HG22 | THR | P | 142 | -7.859  | -9.322  | 0.637  | 0.00 | 0.00 | PROA |
| 2218 | ATOM | 2218 | HG23 | THR | P | 142 | -7.023  | -8.357  | 1.936  | 0.00 | 0.00 | PROA |
| 2219 | ATOM | 2219 | C    | THR | P | 142 | -7.118  | -11.921 | 1.846  | 0.00 | 0.00 | PROA |
| 2220 | ATOM | 2220 | O    | THR | P | 142 | -6.271  | -11.860 | 1.002  | 0.00 | 0.00 | PROA |
| 2221 | ATOM | 2221 | N    | THR | P | 143 | -8.067  | -12.924 | 1.740  | 0.00 | 0.00 | PROA |
| 2222 | ATOM | 2222 | HN   | THR | P | 143 | -8.704  | -13.047 | 2.497  | 0.00 | 0.00 | PROA |
| 2223 | ATOM | 2223 | CA   | THR | P | 143 | -8.214  | -13.898 | 0.651  | 0.00 | 0.00 | PROA |
| 2224 | ATOM | 2224 | HA   | THR | P | 143 | -7.367  | -13.764 | -0.005 | 0.00 | 0.00 | PROA |
| 2225 | ATOM | 2225 | CB   | THR | P | 143 | -8.255  | -15.336 | 1.120  | 0.00 | 0.00 | PROA |
| 2226 | ATOM | 2226 | HB   | THR | P | 143 | -8.183  | -15.815 | 0.120  | 0.00 | 0.00 | PROA |
| 2227 | ATOM | 2227 | OG1  | THR | P | 143 | -9.429  | -15.648 | 1.799  | 0.00 | 0.00 | PROA |
| 2228 | ATOM | 2228 | HG1  | THR | P | 143 | -10.070 | -15.761 | 1.093  | 0.00 | 0.00 | PROA |
| 2229 | ATOM | 2229 | CG2  | THR | P | 143 | -6.991  | -15.651 | 1.852  | 0.00 | 0.00 | PROA |
| 2230 | ATOM | 2230 | HG21 | THR | P | 143 | -7.077  | -16.727 | 2.115  | 0.00 | 0.00 | PROA |
| 2231 | ATOM | 2231 | HG22 | THR | P | 143 | -6.769  | -15.137 | 2.812  | 0.00 | 0.00 | PROA |
| 2232 | ATOM | 2232 | HG23 | THR | P | 143 | -6.173  | -15.505 | 1.114  | 0.00 | 0.00 | PROA |
| 2233 | ATOM | 2233 | C    | THR | P | 143 | -9.326  | -13.550 | -0.322 | 0.00 | 0.00 | PROA |
| 2234 | ATOM | 2234 | O    | THR | P | 143 | -9.658  | -14.317 | -1.175 | 0.00 | 0.00 | PROA |
| 2235 | ATOM | 2235 | N    | GLN | P | 144 | -9.905  | -12.294 | -0.293 | 0.00 | 0.00 | PROA |
| 2236 | ATOM | 2236 | HN   | GLN | P | 144 | -9.458  | -11.655 | 0.327  | 0.00 | 0.00 | PROA |
| 2237 | ATOM | 2237 | CA   | GLN | P | 144 | -11.118 | -11.982 | -1.044 | 0.00 | 0.00 | PROA |
| 2238 | ATOM | 2238 | HA   | GLN | P | 144 | -11.049 | -12.319 | -2.068 | 0.00 | 0.00 | PROA |
| 2239 | ATOM | 2239 | CB   | GLN | P | 144 | -12.271 | -12.918 | -0.510 | 0.00 | 0.00 | PROA |
| 2240 | ATOM | 2240 | HB1  | GLN | P | 144 | -12.101 | -13.900 | -1.000 | 0.00 | 0.00 | PROA |
| 2241 | ATOM | 2241 | HB2  | GLN | P | 144 | -13.223 | -12.504 | -0.906 | 0.00 | 0.00 | PROA |
| 2242 | ATOM | 2242 | CG   | GLN | P | 144 | -12.334 | -13.153 | 1.011  | 0.00 | 0.00 | PROA |
| 2243 | ATOM | 2243 | HG1  | GLN | P | 144 | -11.363 | -13.417 | 1.483  | 0.00 | 0.00 | PROA |
| 2244 | ATOM | 2244 | HG2  | GLN | P | 144 | -12.929 | -14.079 | 1.166  | 0.00 | 0.00 | PROA |
| 2245 | ATOM | 2245 | CD   | GLN | P | 144 | -13.092 | -11.980 | 1.743  | 0.00 | 0.00 | PROA |
| 2246 | ATOM | 2246 | OE1  | GLN | P | 144 | -14.222 | -11.525 | 1.425  | 0.00 | 0.00 | PROA |
| 2247 | ATOM | 2247 | NE2  | GLN | P | 144 | -12.553 | -11.556 | 2.874  | 0.00 | 0.00 | PROA |
| 2248 | ATOM | 2248 | HE21 | GLN | P | 144 | -11.767 | -11.954 | 3.347  | 0.00 | 0.00 | PROA |
| 2249 | ATOM | 2249 | HE22 | GLN | P | 144 | -13.055 | -10.851 | 3.376  | 0.00 | 0.00 | PROA |
| 2250 | ATOM | 2250 | C    | GLN | P | 144 | -11.408 | -10.548 | -1.304 | 0.00 | 0.00 | PROA |
| 2251 | ATOM | 2251 | O    | GLN | P | 144 | -12.391 | -9.980  | -0.801 | 0.00 | 0.00 | PROA |
| 2252 | ATOM | 2252 | N    | ARG | P | 145 | -10.518 | -9.899  | -2.088 | 0.00 | 0.00 | PROA |
| 2253 | ATOM | 2253 | HN   | ARG | P | 145 | -9.716  | -10.312 | -2.513 | 0.00 | 0.00 | PROA |
| 2254 | ATOM | 2254 | CA   | ARG | P | 145 | -10.570 | -8.452  | -2.304 | 0.00 | 0.00 | PROA |
| 2255 | ATOM | 2255 | HA   | ARG | P | 145 | -11.537 | -8.028  | -2.077 | 0.00 | 0.00 | PROA |
| 2256 | ATOM | 2256 | CB   | ARG | P | 145 | -9.520  | -7.846  | -1.331 | 0.00 | 0.00 | PROA |
| 2257 | ATOM | 2257 | HB1  | ARG | P | 145 | -8.539  | -8.356  | -1.437 | 0.00 | 0.00 | PROA |
| 2258 | ATOM | 2258 | HB2  | ARG | P | 145 | -9.942  | -8.078  | -0.330 | 0.00 | 0.00 | PROA |
| 2259 | ATOM | 2259 | CG   | ARG | P | 145 | -9.308  | -6.281  | -1.365 | 0.00 | 0.00 | PROA |
| 2260 | ATOM | 2260 | HG1  | ARG | P | 145 | -8.951  | -5.964  | -2.368 | 0.00 | 0.00 | PROA |
| 2261 | ATOM | 2261 | HG2  | ARG | P | 145 | -8.478  | -6.055  | -0.662 | 0.00 | 0.00 | PROA |
| 2262 | ATOM | 2262 | CD   | ARG | P | 145 | -10.660 | -5.517  | -1.166 | 0.00 | 0.00 | PROA |
| 2263 | ATOM | 2263 | HD1  | ARG | P | 145 | -11.202 | -5.941  | -0.293 | 0.00 | 0.00 | PROA |

|      |      |      |      |     |   |     |         |        |         |      |      |      |
|------|------|------|------|-----|---|-----|---------|--------|---------|------|------|------|
| 2264 | ATOM | 2264 | HD2  | ARG | P | 145 | -11.434 | -5.681 | -1.946  | 0.00 | 0.00 | PROA |
| 2265 | ATOM | 2265 | NE   | ARG | P | 145 | -10.536 | -3.973 | -1.062  | 0.00 | 0.00 | PROA |
| 2266 | ATOM | 2266 | HE   | ARG | P | 145 | -9.657  | -3.542 | -1.265  | 0.00 | 0.00 | PROA |
| 2267 | ATOM | 2267 | CZ   | ARG | P | 145 | -11.461 | -3.062 | -0.879  | 0.00 | 0.00 | PROA |
| 2268 | ATOM | 2268 | NH1  | ARG | P | 145 | -12.752 | -3.350 | -0.841  | 0.00 | 0.00 | PROA |
| 2269 | ATOM | 2269 | HH11 | ARG | P | 145 | -12.977 | -4.322 | -0.775  | 0.00 | 0.00 | PROA |
| 2270 | ATOM | 2270 | HH12 | ARG | P | 145 | -13.360 | -2.625 | -0.517  | 0.00 | 0.00 | PROA |
| 2271 | ATOM | 2271 | NH2  | ARG | P | 145 | -11.181 | -1.823 | -0.619  | 0.00 | 0.00 | PROA |
| 2272 | ATOM | 2272 | HH21 | ARG | P | 145 | -10.195 | -1.702 | -0.734  | 0.00 | 0.00 | PROA |
| 2273 | ATOM | 2273 | HH22 | ARG | P | 145 | -11.972 | -1.212 | -0.650  | 0.00 | 0.00 | PROA |
| 2274 | ATOM | 2274 | C    | ARG | P | 145 | -10.169 | -8.114 | -3.756  | 0.00 | 0.00 | PROA |
| 2275 | ATOM | 2275 | O    | ARG | P | 145 | -9.093  | -8.378 | -4.323  | 0.00 | 0.00 | PROA |
| 2276 | ATOM | 2276 | N    | GLY | P | 146 | -11.071 | -7.433 | -4.484  | 0.00 | 0.00 | PROA |
| 2277 | ATOM | 2277 | HN   | GLY | P | 146 | -11.940 | -7.255 | -4.028  | 0.00 | 0.00 | PROA |
| 2278 | ATOM | 2278 | CA   | GLY | P | 146 | -10.723 | -6.829 | -5.733  | 0.00 | 0.00 | PROA |
| 2279 | ATOM | 2279 | HA1  | GLY | P | 146 | -11.602 | -6.236 | -5.934  | 0.00 | 0.00 | PROA |
| 2280 | ATOM | 2280 | HA2  | GLY | P | 146 | -10.405 | -7.632 | -6.382  | 0.00 | 0.00 | PROA |
| 2281 | ATOM | 2281 | C    | GLY | P | 146 | -9.624  | -5.797 | -5.708  | 0.00 | 0.00 | PROA |
| 2282 | ATOM | 2282 | O    | GLY | P | 146 | -9.356  | -5.273 | -4.654  | 0.00 | 0.00 | PROA |
| 2283 | ATOM | 2283 | N    | GLY | P | 147 | -9.030  | -5.419 | -6.852  | 0.00 | 0.00 | PROA |
| 2284 | ATOM | 2284 | HN   | GLY | P | 147 | -9.279  | -5.857 | -7.712  | 0.00 | 0.00 | PROA |
| 2285 | ATOM | 2285 | CA   | GLY | P | 147 | -7.896  | -4.431 | -6.787  | 0.00 | 0.00 | PROA |
| 2286 | ATOM | 2286 | HA1  | GLY | P | 147 | -6.949  | -4.950 | -6.794  | 0.00 | 0.00 | PROA |
| 2287 | ATOM | 2287 | HA2  | GLY | P | 147 | -8.128  | -3.712 | -6.015  | 0.00 | 0.00 | PROA |
| 2288 | ATOM | 2288 | C    | GLY | P | 147 | -7.808  | -3.482 | -7.915  | 0.00 | 0.00 | PROA |
| 2289 | ATOM | 2289 | O    | GLY | P | 147 | -6.680  | -3.026 | -8.187  | 0.00 | 0.00 | PROA |
| 2290 | ATOM | 2290 | N    | LYS | P | 148 | -8.950  | -3.179 | -8.562  | 0.00 | 0.00 | PROA |
| 2291 | ATOM | 2291 | HN   | LYS | P | 148 | -9.751  | -3.654 | -8.206  | 0.00 | 0.00 | PROA |
| 2292 | ATOM | 2292 | CA   | LYS | P | 148 | -9.244  | -2.205 | -9.617  | 0.00 | 0.00 | PROA |
| 2293 | ATOM | 2293 | HA   | LYS | P | 148 | -10.316 | -2.122 | -9.716  | 0.00 | 0.00 | PROA |
| 2294 | ATOM | 2294 | CB   | LYS | P | 148 | -8.863  | -0.770 | -9.106  | 0.00 | 0.00 | PROA |
| 2295 | ATOM | 2295 | HB1  | LYS | P | 148 | -8.883  | 0.005  | -9.901  | 0.00 | 0.00 | PROA |
| 2296 | ATOM | 2296 | HB2  | LYS | P | 148 | -7.826  | -0.824 | -8.711  | 0.00 | 0.00 | PROA |
| 2297 | ATOM | 2297 | CG   | LYS | P | 148 | -9.638  | -0.360 | -7.836  | 0.00 | 0.00 | PROA |
| 2298 | ATOM | 2298 | HG1  | LYS | P | 148 | -9.115  | -0.879 | -7.004  | 0.00 | 0.00 | PROA |
| 2299 | ATOM | 2299 | HG2  | LYS | P | 148 | -10.665 | -0.782 | -7.881  | 0.00 | 0.00 | PROA |
| 2300 | ATOM | 2300 | CD   | LYS | P | 148 | -9.806  | 1.177  | -7.626  | 0.00 | 0.00 | PROA |
| 2301 | ATOM | 2301 | HD1  | LYS | P | 148 | -10.416 | 1.247  | -6.700  | 0.00 | 0.00 | PROA |
| 2302 | ATOM | 2302 | HD2  | LYS | P | 148 | -10.475 | 1.684  | -8.355  | 0.00 | 0.00 | PROA |
| 2303 | ATOM | 2303 | CE   | LYS | P | 148 | -8.456  | 1.914  | -7.502  | 0.00 | 0.00 | PROA |
| 2304 | ATOM | 2304 | HE1  | LYS | P | 148 | -8.034  | 1.933  | -8.529  | 0.00 | 0.00 | PROA |
| 2305 | ATOM | 2305 | HE2  | LYS | P | 148 | -7.743  | 1.500  | -6.757  | 0.00 | 0.00 | PROA |
| 2306 | ATOM | 2306 | NZ   | LYS | P | 148 | -8.689  | 3.291  | -6.934  | 0.00 | 0.00 | PROA |
| 2307 | ATOM | 2307 | HZ1  | LYS | P | 148 | -9.577  | 3.278  | -6.394  | 0.00 | 0.00 | PROA |
| 2308 | ATOM | 2308 | HZ2  | LYS | P | 148 | -8.774  | 3.940  | -7.742  | 0.00 | 0.00 | PROA |
| 2309 | ATOM | 2309 | HZ3  | LYS | P | 148 | -7.925  | 3.669  | -6.338  | 0.00 | 0.00 | PROA |
| 2310 | ATOM | 2310 | C    | LYS | P | 148 | -8.791  | -2.485 | -11.039 | 0.00 | 0.00 | PROA |
| 2311 | ATOM | 2311 | O    | LYS | P | 148 | -7.856  | -3.253 | -11.269 | 0.00 | 0.00 | PROA |
| 2312 | ATOM | 2312 | N    | GLU | P | 149 | -9.597  | -2.131 | -11.989 | 0.00 | 0.00 | PROA |
| 2313 | ATOM | 2313 | HN   | GLU | P | 149 | -10.271 | -1.444 | -11.727 | 0.00 | 0.00 | PROA |
| 2314 | ATOM | 2314 | CA   | GLU | P | 149 | -9.299  | -2.302 | -13.359 | 0.00 | 0.00 | PROA |
| 2315 | ATOM | 2315 | HA   | GLU | P | 149 | -8.385  | -2.845 | -13.547 | 0.00 | 0.00 | PROA |
| 2316 | ATOM | 2316 | CB   | GLU | P | 149 | -10.389 | -3.014 | -14.083 | 0.00 | 0.00 | PROA |
| 2317 | ATOM | 2317 | HB1  | GLU | P | 149 | -10.030 | -3.181 | -15.121 | 0.00 | 0.00 | PROA |
| 2318 | ATOM | 2318 | HB2  | GLU | P | 149 | -11.367 | -2.486 | -14.075 | 0.00 | 0.00 | PROA |
| 2319 | ATOM | 2319 | CG   | GLU | P | 149 | -10.539 | -4.480 | -13.605 | 0.00 | 0.00 | PROA |
| 2320 | ATOM | 2320 | HG1  | GLU | P | 149 | -11.136 | -5.108 | -14.300 | 0.00 | 0.00 | PROA |
| 2321 | ATOM | 2321 | HG2  | GLU | P | 149 | -11.215 | -4.457 | -12.723 | 0.00 | 0.00 | PROA |
| 2322 | ATOM | 2322 | CD   | GLU | P | 149 | -9.243  | -5.249 | -13.397 | 0.00 | 0.00 | PROA |
| 2323 | ATOM | 2323 | OE1  | GLU | P | 149 | -8.284  | -5.244 | -14.252 | 0.00 | 0.00 | PROA |
| 2324 | ATOM | 2324 | OE2  | GLU | P | 149 | -9.056  | -5.933 | -12.330 | 0.00 | 0.00 | PROA |
| 2325 | ATOM | 2325 | C    | GLU | P | 149 | -9.136  | -0.954 | -14.094 | 0.00 | 0.00 | PROA |
| 2326 | ATOM | 2326 | O    | GLU | P | 149 | -9.126  | 0.152  | -13.475 | 0.00 | 0.00 | PROA |
| 2327 | ATOM | 2327 | N    | LEU | P | 150 | -8.895  | -1.021 | -15.410 | 0.00 | 0.00 | PROA |
| 2328 | ATOM | 2328 | HN   | LEU | P | 150 | -8.889  | -1.826 | -15.998 | 0.00 | 0.00 | PROA |
| 2329 | ATOM | 2329 | CA   | LEU | P | 150 | -8.512  | 0.073  | -16.234 | 0.00 | 0.00 | PROA |
| 2330 | ATOM | 2330 | HA   | LEU | P | 150 | -7.698  | 0.631  | -15.796 | 0.00 | 0.00 | PROA |
| 2331 | ATOM | 2331 | CB   | LEU | P | 150 | -8.134  | -0.450 | -17.682 | 0.00 | 0.00 | PROA |
| 2332 | ATOM | 2332 | HB1  | LEU | P | 150 | -8.066  | 0.375  | -18.424 | 0.00 | 0.00 | PROA |
| 2333 | ATOM | 2333 | HB2  | LEU | P | 150 | -8.909  | -1.101 | -18.140 | 0.00 | 0.00 | PROA |
| 2334 | ATOM | 2334 | CG   | LEU | P | 150 | -6.746  | -1.106 | -17.707 | 0.00 | 0.00 | PROA |
| 2335 | ATOM | 2335 | HG   | LEU | P | 150 | -6.533  | -1.580 | -16.725 | 0.00 | 0.00 | PROA |
| 2336 | ATOM | 2336 | CD1  | LEU | P | 150 | -6.555  | -2.101 | -18.958 | 0.00 | 0.00 | PROA |



|      |      |      |      |     |   |     |         |        |         |      |      |      |
|------|------|------|------|-----|---|-----|---------|--------|---------|------|------|------|
| 2337 | ATOM | 2337 | HD11 | LEU | P | 150 | -7.156  | -3.014 | -18.759 | 0.00 | 0.00 | PROA |
| 2338 | ATOM | 2338 | HD12 | LEU | P | 150 | -5.512  | -2.431 | -19.153 | 0.00 | 0.00 | PROA |
| 2339 | ATOM | 2339 | HD13 | LEU | P | 150 | -7.017  | -1.582 | -19.824 | 0.00 | 0.00 | PROA |
| 2340 | ATOM | 2340 | CD2  | LEU | P | 150 | -5.573  | -0.018 | -17.847 | 0.00 | 0.00 | PROA |
| 2341 | ATOM | 2341 | HD21 | LEU | P | 150 | -5.763  | 0.636  | -18.725 | 0.00 | 0.00 | PROA |
| 2342 | ATOM | 2342 | HD22 | LEU | P | 150 | -4.600  | -0.546 | -17.944 | 0.00 | 0.00 | PROA |
| 2343 | ATOM | 2343 | HD23 | LEU | P | 150 | -5.565  | 0.695  | -16.995 | 0.00 | 0.00 | PROA |
| 2344 | ATOM | 2344 | C    | LEU | P | 150 | -9.595  | 1.151  | -16.343 | 0.00 | 0.00 | PROA |
| 2345 | ATOM | 2345 | O    | LEU | P | 150 | -10.765 | 0.905  | -16.061 | 0.00 | 0.00 | PROA |
| 2346 | ATOM | 2346 | N    | GLY | P | 151 | -9.195  | 2.405  | -16.565 | 0.00 | 0.00 | PROA |
| 2347 | ATOM | 2347 | HN   | GLY | P | 151 | -8.341  | 2.654  | -17.014 | 0.00 | 0.00 | PROA |
| 2348 | ATOM | 2348 | CA   | GLY | P | 151 | -10.123 | 3.461  | -16.130 | 0.00 | 0.00 | PROA |
| 2349 | ATOM | 2349 | HA1  | GLY | P | 151 | -11.077 | 3.274  | -16.600 | 0.00 | 0.00 | PROA |
| 2350 | ATOM | 2350 | HA2  | GLY | P | 151 | -9.654  | 4.400  | -16.384 | 0.00 | 0.00 | PROA |
| 2351 | ATOM | 2351 | C    | GLY | P | 151 | -10.453 | 3.533  | -14.646 | 0.00 | 0.00 | PROA |
| 2352 | ATOM | 2352 | O    | GLY | P | 151 | -9.558  | 3.473  | -13.788 | 0.00 | 0.00 | PROA |
| 2353 | ATOM | 2353 | N    | LEU | P | 152 | -11.717 | 3.871  | -14.283 | 0.00 | 0.00 | PROA |
| 2354 | ATOM | 2354 | HN   | LEU | P | 152 | -12.385 | 4.170  | -14.960 | 0.00 | 0.00 | PROA |
| 2355 | ATOM | 2355 | CA   | LEU | P | 152 | -12.139 | 4.000  | -12.855 | 0.00 | 0.00 | PROA |
| 2356 | ATOM | 2356 | HA   | LEU | P | 152 | -11.311 | 4.008  | -12.161 | 0.00 | 0.00 | PROA |
| 2357 | ATOM | 2357 | CB   | LEU | P | 152 | -12.819 | 5.347  | -12.741 | 0.00 | 0.00 | PROA |
| 2358 | ATOM | 2358 | HB1  | LEU | P | 152 | -12.855 | 5.565  | -11.652 | 0.00 | 0.00 | PROA |
| 2359 | ATOM | 2359 | HB2  | LEU | P | 152 | -13.788 | 5.315  | -13.283 | 0.00 | 0.00 | PROA |
| 2360 | ATOM | 2360 | CG   | LEU | P | 152 | -11.970 | 6.562  | -13.283 | 0.00 | 0.00 | PROA |
| 2361 | ATOM | 2361 | HG   | LEU | P | 152 | -11.575 | 6.283  | -14.283 | 0.00 | 0.00 | PROA |
| 2362 | ATOM | 2362 | CD1  | LEU | P | 152 | -12.860 | 7.776  | -13.313 | 0.00 | 0.00 | PROA |
| 2363 | ATOM | 2363 | HD11 | LEU | P | 152 | -12.306 | 8.675  | -13.659 | 0.00 | 0.00 | PROA |
| 2364 | ATOM | 2364 | HD12 | LEU | P | 152 | -13.166 | 8.167  | -12.319 | 0.00 | 0.00 | PROA |
| 2365 | ATOM | 2365 | HD13 | LEU | P | 152 | -13.827 | 7.713  | -13.856 | 0.00 | 0.00 | PROA |
| 2366 | ATOM | 2366 | CD2  | LEU | P | 152 | -10.798 | 6.780  | -12.336 | 0.00 | 0.00 | PROA |
| 2367 | ATOM | 2367 | HD21 | LEU | P | 152 | -10.240 | 5.821  | -12.285 | 0.00 | 0.00 | PROA |
| 2368 | ATOM | 2368 | HD22 | LEU | P | 152 | -11.139 | 7.091  | -11.326 | 0.00 | 0.00 | PROA |
| 2369 | ATOM | 2369 | HD23 | LEU | P | 152 | -10.088 | 7.536  | -12.734 | 0.00 | 0.00 | PROA |
| 2370 | ATOM | 2370 | C    | LEU | P | 152 | -12.996 | 2.797  | -12.453 | 0.00 | 0.00 | PROA |
| 2371 | ATOM | 2371 | O    | LEU | P | 152 | -13.818 | 2.967  | -11.594 | 0.00 | 0.00 | PROA |
| 2372 | ATOM | 2372 | N    | ARG | P | 153 | -12.745 | 1.587  | -13.026 | 0.00 | 0.00 | PROA |
| 2373 | ATOM | 2373 | HN   | ARG | P | 153 | -11.944 | 1.570  | -13.619 | 0.00 | 0.00 | PROA |
| 2374 | ATOM | 2374 | CA   | ARG | P | 153 | -13.463 | 0.319  | -12.745 | 0.00 | 0.00 | PROA |
| 2375 | ATOM | 2375 | HA   | ARG | P | 153 | -14.437 | 0.576  | -12.356 | 0.00 | 0.00 | PROA |
| 2376 | ATOM | 2376 | CB   | ARG | P | 153 | -13.648 | -0.426 | -14.054 | 0.00 | 0.00 | PROA |
| 2377 | ATOM | 2377 | HB1  | ARG | P | 153 | -14.128 | -1.421 | -13.941 | 0.00 | 0.00 | PROA |
| 2378 | ATOM | 2378 | HB2  | ARG | P | 153 | -12.598 | -0.707 | -14.281 | 0.00 | 0.00 | PROA |
| 2379 | ATOM | 2379 | CG   | ARG | P | 153 | -14.345 | 0.234  | -15.297 | 0.00 | 0.00 | PROA |
| 2380 | ATOM | 2380 | HG1  | ARG | P | 153 | -14.329 | 1.344  | -15.248 | 0.00 | 0.00 | PROA |
| 2381 | ATOM | 2381 | HG2  | ARG | P | 153 | -15.433 | 0.049  | -15.171 | 0.00 | 0.00 | PROA |
| 2382 | ATOM | 2382 | CD   | ARG | P | 153 | -13.970 | -0.223 | -16.700 | 0.00 | 0.00 | PROA |
| 2383 | ATOM | 2383 | HD1  | ARG | P | 153 | -12.894 | -0.063 | -16.928 | 0.00 | 0.00 | PROA |
| 2384 | ATOM | 2384 | HD2  | ARG | P | 153 | -14.513 | 0.238  | -17.553 | 0.00 | 0.00 | PROA |
| 2385 | ATOM | 2385 | NE   | ARG | P | 153 | -14.282 | -1.699 | -16.699 | 0.00 | 0.00 | PROA |
| 2386 | ATOM | 2386 | HE   | ARG | P | 153 | -15.179 | -1.976 | -16.353 | 0.00 | 0.00 | PROA |
| 2387 | ATOM | 2387 | CZ   | ARG | P | 153 | -13.537 | -2.644 | -17.285 | 0.00 | 0.00 | PROA |
| 2388 | ATOM | 2388 | NH1  | ARG | P | 153 | -13.579 | -3.894 | -16.798 | 0.00 | 0.00 | PROA |
| 2389 | ATOM | 2389 | HH11 | ARG | P | 153 | -14.043 | -4.195 | -15.964 | 0.00 | 0.00 | PROA |
| 2390 | ATOM | 2390 | HH12 | ARG | P | 153 | -12.773 | -4.435 | -17.037 | 0.00 | 0.00 | PROA |
| 2391 | ATOM | 2391 | NH2  | ARG | P | 153 | -12.579 | -2.354 | -18.133 | 0.00 | 0.00 | PROA |
| 2392 | ATOM | 2392 | HH21 | ARG | P | 153 | -12.470 | -1.415 | -18.460 | 0.00 | 0.00 | PROA |
| 2393 | ATOM | 2393 | HH22 | ARG | P | 153 | -12.093 | -3.069 | -18.635 | 0.00 | 0.00 | PROA |
| 2394 | ATOM | 2394 | C    | ARG | P | 153 | -12.890 | -0.501 | -11.604 | 0.00 | 0.00 | PROA |
| 2395 | ATOM | 2395 | O    | ARG | P | 153 | -11.730 | -0.414 | -11.304 | 0.00 | 0.00 | PROA |
| 2396 | ATOM | 2396 | N    | ASN | P | 154 | -13.710 | -1.383 | -10.918 | 0.00 | 0.00 | PROA |
| 2397 | ATOM | 2397 | HN   | ASN | P | 154 | -14.627 | -1.447 | -11.306 | 0.00 | 0.00 | PROA |
| 2398 | ATOM | 2398 | CA   | ASN | P | 154 | -13.245 | -2.387 | -10.009 | 0.00 | 0.00 | PROA |
| 2399 | ATOM | 2399 | HA   | ASN | P | 154 | -12.263 | -2.072 | -9.689  | 0.00 | 0.00 | PROA |
| 2400 | ATOM | 2400 | CB   | ASN | P | 154 | -14.290 | -2.394 | -8.818  | 0.00 | 0.00 | PROA |
| 2401 | ATOM | 2401 | HB1  | ASN | P | 154 | -14.318 | -3.392 | -8.331  | 0.00 | 0.00 | PROA |
| 2402 | ATOM | 2402 | HB2  | ASN | P | 154 | -15.283 | -2.234 | -9.291  | 0.00 | 0.00 | PROA |
| 2403 | ATOM | 2403 | CG   | ASN | P | 154 | -14.037 | -1.323 | -7.756  | 0.00 | 0.00 | PROA |
| 2404 | ATOM | 2404 | OD1  | ASN | P | 154 | -13.506 | -1.516 | -6.600  | 0.00 | 0.00 | PROA |
| 2405 | ATOM | 2405 | ND2  | ASN | P | 154 | -14.306 | -0.026 | -8.103  | 0.00 | 0.00 | PROA |
| 2406 | ATOM | 2406 | HD21 | ASN | P | 154 | -13.940 | 0.676  | -7.492  | 0.00 | 0.00 | PROA |
| 2407 | ATOM | 2407 | HD22 | ASN | P | 154 | -14.771 | 0.150  | -8.970  | 0.00 | 0.00 | PROA |
| 2408 | ATOM | 2408 | C    | ASN | P | 154 | -12.993 | -3.738 | -10.636 | 0.00 | 0.00 | PROA |
| 2409 | ATOM | 2409 | O    | ASN | P | 154 | -13.492 | -4.042 | -11.694 | 0.00 | 0.00 | PROA |

|      |      |      |     |     |   |     |         |         |         |      |      |      |
|------|------|------|-----|-----|---|-----|---------|---------|---------|------|------|------|
| 2410 | ATOM | 2410 | N   | SER | P | 155 | -12.301 | -4.669  | -9.924  | 0.00 | 0.00 | PROA |
| 2411 | ATOM | 2411 | HN  | SER | P | 155 | -11.860 | -4.351  | -9.088  | 0.00 | 0.00 | PROA |
| 2412 | ATOM | 2412 | CA  | SER | P | 155 | -12.003 | -6.021  | -10.388 | 0.00 | 0.00 | PROA |
| 2413 | ATOM | 2413 | HA  | SER | P | 155 | -11.634 | -5.907  | -11.396 | 0.00 | 0.00 | PROA |
| 2414 | ATOM | 2414 | CB  | SER | P | 155 | -10.911 | -6.720  | -9.604  | 0.00 | 0.00 | PROA |
| 2415 | ATOM | 2415 | HB1 | SER | P | 155 | -10.634 | -7.778  | -9.798  | 0.00 | 0.00 | PROA |
| 2416 | ATOM | 2416 | HB2 | SER | P | 155 | -11.322 | -6.708  | -8.571  | 0.00 | 0.00 | PROA |
| 2417 | ATOM | 2417 | OG  | SER | P | 155 | -9.680  | -5.927  | -9.713  | 0.00 | 0.00 | PROA |
| 2418 | ATOM | 2418 | HG1 | SER | P | 155 | -9.526  | -5.727  | -10.639 | 0.00 | 0.00 | PROA |
| 2419 | ATOM | 2419 | C   | SER | P | 155 | -13.278 | -6.908  | -10.453 | 0.00 | 0.00 | PROA |
| 2420 | ATOM | 2420 | O   | SER | P | 155 | -14.306 | -6.658  | -9.792  | 0.00 | 0.00 | PROA |
| 2421 | ATOM | 2421 | N   | ASP | P | 156 | -13.268 | -7.999  | -11.320 | 0.00 | 0.00 | PROA |
| 2422 | ATOM | 2422 | HN  | ASP | P | 156 | -12.407 | -8.070  | -11.819 | 0.00 | 0.00 | PROA |
| 2423 | ATOM | 2423 | CA  | ASP | P | 156 | -14.326 | -8.850  | -11.578 | 0.00 | 0.00 | PROA |
| 2424 | ATOM | 2424 | HA  | ASP | P | 156 | -15.191 | -8.482  | -11.046 | 0.00 | 0.00 | PROA |
| 2425 | ATOM | 2425 | CB  | ASP | P | 156 | -14.668 | -8.959  | -13.128 | 0.00 | 0.00 | PROA |
| 2426 | ATOM | 2426 | HB1 | ASP | P | 156 | -15.363 | -9.780  | -13.404 | 0.00 | 0.00 | PROA |
| 2427 | ATOM | 2427 | HB2 | ASP | P | 156 | -13.763 | -8.994  | -13.772 | 0.00 | 0.00 | PROA |
| 2428 | ATOM | 2428 | CG  | ASP | P | 156 | -15.342 | -7.654  | -13.580 | 0.00 | 0.00 | PROA |
| 2429 | ATOM | 2429 | OD1 | ASP | P | 156 | -15.420 | -7.403  | -14.789 | 0.00 | 0.00 | PROA |
| 2430 | ATOM | 2430 | OD2 | ASP | P | 156 | -16.006 | -6.997  | -12.728 | 0.00 | 0.00 | PROA |
| 2431 | ATOM | 2431 | C   | ASP | P | 156 | -14.059 | -10.250 | -11.054 | 0.00 | 0.00 | PROA |
| 2432 | ATOM | 2432 | O   | ASP | P | 156 | -14.911 | -11.150 | -11.207 | 0.00 | 0.00 | PROA |
| 2433 | ATOM | 2433 | N   | MET | P | 157 | -12.904 | -10.430 | -10.360 | 0.00 | 0.00 | PROA |
| 2434 | ATOM | 2434 | HN  | MET | P | 157 | -12.217 | -9.737  | -10.158 | 0.00 | 0.00 | PROA |
| 2435 | ATOM | 2435 | CA  | MET | P | 157 | -12.622 | -11.699 | -9.734  | 0.00 | 0.00 | PROA |
| 2436 | ATOM | 2436 | HA  | MET | P | 157 | -13.541 | -12.208 | -9.484  | 0.00 | 0.00 | PROA |
| 2437 | ATOM | 2437 | CB  | MET | P | 157 | -11.725 | -12.544 | -10.538 | 0.00 | 0.00 | PROA |
| 2438 | ATOM | 2438 | HB1 | MET | P | 157 | -10.663 | -12.217 | -10.559 | 0.00 | 0.00 | PROA |
| 2439 | ATOM | 2439 | HB2 | MET | P | 157 | -11.998 | -12.656 | -11.609 | 0.00 | 0.00 | PROA |
| 2440 | ATOM | 2440 | CG  | MET | P | 157 | -11.522 | -14.005 | -10.004 | 0.00 | 0.00 | PROA |
| 2441 | ATOM | 2441 | HG1 | MET | P | 157 | -11.316 | -14.603 | -10.917 | 0.00 | 0.00 | PROA |
| 2442 | ATOM | 2442 | HG2 | MET | P | 157 | -12.581 | -14.241 | -9.762  | 0.00 | 0.00 | PROA |
| 2443 | ATOM | 2443 | SD  | MET | P | 157 | -10.380 | -14.462 | -8.661  | 0.00 | 0.00 | PROA |
| 2444 | ATOM | 2444 | CE  | MET | P | 157 | -11.135 | -16.032 | -8.268  | 0.00 | 0.00 | PROA |
| 2445 | ATOM | 2445 | HE1 | MET | P | 157 | -10.662 | -16.796 | -8.921  | 0.00 | 0.00 | PROA |
| 2446 | ATOM | 2446 | HE2 | MET | P | 157 | -12.244 | -16.086 | -8.309  | 0.00 | 0.00 | PROA |
| 2447 | ATOM | 2447 | HE3 | MET | P | 157 | -10.887 | -16.251 | -7.207  | 0.00 | 0.00 | PROA |
| 2448 | ATOM | 2448 | C   | MET | P | 157 | -11.981 | -11.256 | -8.348  | 0.00 | 0.00 | PROA |
| 2449 | ATOM | 2449 | O   | MET | P | 157 | -11.209 | -10.293 | -8.221  | 0.00 | 0.00 | PROA |
| 2450 | ATOM | 2450 | N   | ASP | P | 158 | -12.267 | -12.030 | -7.357  | 0.00 | 0.00 | PROA |
| 2451 | ATOM | 2451 | HN  | ASP | P | 158 | -12.840 | -12.818 | -7.569  | 0.00 | 0.00 | PROA |
| 2452 | ATOM | 2452 | CA  | ASP | P | 158 | -11.827 | -11.801 | -5.969  | 0.00 | 0.00 | PROA |
| 2453 | ATOM | 2453 | HA  | ASP | P | 158 | -11.701 | -10.730 | -5.908  | 0.00 | 0.00 | PROA |
| 2454 | ATOM | 2454 | CB  | ASP | P | 158 | -12.871 | -12.358 | -4.900  | 0.00 | 0.00 | PROA |
| 2455 | ATOM | 2455 | HB1 | ASP | P | 158 | -12.328 | -12.526 | -3.946  | 0.00 | 0.00 | PROA |
| 2456 | ATOM | 2456 | HB2 | ASP | P | 158 | -13.085 | -13.359 | -5.332  | 0.00 | 0.00 | PROA |
| 2457 | ATOM | 2457 | CG  | ASP | P | 158 | -14.148 | -11.471 | -4.897  | 0.00 | 0.00 | PROA |
| 2458 | ATOM | 2458 | OD1 | ASP | P | 158 | -15.143 | -11.984 | -5.423  | 0.00 | 0.00 | PROA |
| 2459 | ATOM | 2459 | OD2 | ASP | P | 158 | -14.016 | -10.345 | -4.423  | 0.00 | 0.00 | PROA |
| 2460 | ATOM | 2460 | C   | ASP | P | 158 | -10.461 | -12.399 | -5.582  | 0.00 | 0.00 | PROA |
| 2461 | ATOM | 2461 | O   | ASP | P | 158 | -10.259 | -13.583 | -5.436  | 0.00 | 0.00 | PROA |
| 2462 | ATOM | 2462 | N   | TYR | P | 159 | -9.435  | -11.569 | -5.337  | 0.00 | 0.00 | PROA |
| 2463 | ATOM | 2463 | HN  | TYR | P | 159 | -9.715  | -10.613 | -5.378  | 0.00 | 0.00 | PROA |
| 2464 | ATOM | 2464 | CA  | TYR | P | 159 | -8.090  | -11.853 | -5.239  | 0.00 | 0.00 | PROA |
| 2465 | ATOM | 2465 | HA  | TYR | P | 159 | -7.828  | -12.801 | -5.687  | 0.00 | 0.00 | PROA |
| 2466 | ATOM | 2466 | CB  | TYR | P | 159 | -7.221  | -10.760 | -5.883  | 0.00 | 0.00 | PROA |
| 2467 | ATOM | 2467 | HB1 | TYR | P | 159 | -6.223  | -11.245 | -5.931  | 0.00 | 0.00 | PROA |
| 2468 | ATOM | 2468 | HB2 | TYR | P | 159 | -7.318  | -9.839  | -5.269  | 0.00 | 0.00 | PROA |
| 2469 | ATOM | 2469 | CG  | TYR | P | 159 | -7.506  | -10.391 | -7.253  | 0.00 | 0.00 | PROA |
| 2470 | ATOM | 2470 | CD1 | TYR | P | 159 | -7.476  | -9.063  | -7.624  | 0.00 | 0.00 | PROA |
| 2471 | ATOM | 2471 | HD1 | TYR | P | 159 | -7.345  | -8.322  | -6.850  | 0.00 | 0.00 | PROA |
| 2472 | ATOM | 2472 | CE1 | TYR | P | 159 | -7.776  | -8.692  | -8.936  | 0.00 | 0.00 | PROA |
| 2473 | ATOM | 2473 | HE1 | TYR | P | 159 | -7.782  | -7.657  | -9.246  | 0.00 | 0.00 | PROA |
| 2474 | ATOM | 2474 | CZ  | TYR | P | 159 | -8.181  | -9.600  | -9.894  | 0.00 | 0.00 | PROA |
| 2475 | ATOM | 2475 | OH  | TYR | P | 159 | -8.451  | -9.209  | -11.271 | 0.00 | 0.00 | PROA |
| 2476 | ATOM | 2476 | HH  | TYR | P | 159 | -8.995  | -9.882  | -11.687 | 0.00 | 0.00 | PROA |
| 2477 | ATOM | 2477 | CD2 | TYR | P | 159 | -7.855  | -11.394 | -8.222  | 0.00 | 0.00 | PROA |
| 2478 | ATOM | 2478 | HD2 | TYR | P | 159 | -7.800  | -12.428 | -7.915  | 0.00 | 0.00 | PROA |
| 2479 | ATOM | 2479 | CE2 | TYR | P | 159 | -8.272  | -10.959 | -9.513  | 0.00 | 0.00 | PROA |
| 2480 | ATOM | 2480 | HE2 | TYR | P | 159 | -8.574  | -11.654 | -10.283 | 0.00 | 0.00 | PROA |
| 2481 | ATOM | 2481 | C   | TYR | P | 159 | -7.639  | -12.020 | -3.796  | 0.00 | 0.00 | PROA |
| 2482 | ATOM | 2482 | O   | TYR | P | 159 | -8.253  | -11.678 | -2.778  | 0.00 | 0.00 | PROA |

|      |      |      |      |     |   |     |        |         |        |      |      |      |
|------|------|------|------|-----|---|-----|--------|---------|--------|------|------|------|
| 2483 | ATOM | 2483 | N    | ILE | P | 160 | -6.458 | -12.685 | -3.659 | 0.00 | 0.00 | PROA |
| 2484 | ATOM | 2484 | HN   | ILE | P | 160 | -6.041 | -12.995 | -4.510 | 0.00 | 0.00 | PROA |
| 2485 | ATOM | 2485 | CA   | ILE | P | 160 | -5.752 | -12.880 | -2.377 | 0.00 | 0.00 | PROA |
| 2486 | ATOM | 2486 | HA   | ILE | P | 160 | -6.433 | -12.893 | -1.539 | 0.00 | 0.00 | PROA |
| 2487 | ATOM | 2487 | CB   | ILE | P | 160 | -4.910 | -14.113 | -2.348 | 0.00 | 0.00 | PROA |
| 2488 | ATOM | 2488 | HB   | ILE | P | 160 | -4.386 | -14.283 | -3.313 | 0.00 | 0.00 | PROA |
| 2489 | ATOM | 2489 | CG2  | ILE | P | 160 | -4.007 | -14.287 | -1.061 | 0.00 | 0.00 | PROA |
| 2490 | ATOM | 2490 | HG21 | ILE | P | 160 | -4.615 | -14.383 | -0.136 | 0.00 | 0.00 | PROA |
| 2491 | ATOM | 2491 | HG22 | ILE | P | 160 | -3.157 | -13.575 | -0.992 | 0.00 | 0.00 | PROA |
| 2492 | ATOM | 2492 | HG23 | ILE | P | 160 | -3.416 | -15.219 | -1.187 | 0.00 | 0.00 | PROA |
| 2493 | ATOM | 2493 | CG1  | ILE | P | 160 | -5.859 | -15.307 | -2.544 | 0.00 | 0.00 | PROA |
| 2494 | ATOM | 2494 | HG11 | ILE | P | 160 | -6.652 | -15.221 | -3.316 | 0.00 | 0.00 | PROA |
| 2495 | ATOM | 2495 | HG12 | ILE | P | 160 | -6.459 | -15.665 | -1.680 | 0.00 | 0.00 | PROA |
| 2496 | ATOM | 2496 | CD   | ILE | P | 160 | -5.114 | -16.518 | -3.171 | 0.00 | 0.00 | PROA |
| 2497 | ATOM | 2497 | HD1  | ILE | P | 160 | -4.856 | -16.312 | -4.232 | 0.00 | 0.00 | PROA |
| 2498 | ATOM | 2498 | HD2  | ILE | P | 160 | -5.749 | -17.429 | -3.127 | 0.00 | 0.00 | PROA |
| 2499 | ATOM | 2499 | HD3  | ILE | P | 160 | -4.168 | -16.781 | -2.652 | 0.00 | 0.00 | PROA |
| 2500 | ATOM | 2500 | C    | ILE | P | 160 | -4.821 | -11.675 | -2.241 | 0.00 | 0.00 | PROA |
| 2501 | ATOM | 2501 | O    | ILE | P | 160 | -4.219 | -11.249 | -3.227 | 0.00 | 0.00 | PROA |
| 2502 | ATOM | 2502 | N    | GLN | P | 161 | -4.683 | -11.010 | -1.108 | 0.00 | 0.00 | PROA |
| 2503 | ATOM | 2503 | HN   | GLN | P | 161 | -5.277 | -11.210 | -0.333 | 0.00 | 0.00 | PROA |
| 2504 | ATOM | 2504 | CA   | GLN | P | 161 | -4.117 | -9.726  | -1.067 | 0.00 | 0.00 | PROA |
| 2505 | ATOM | 2505 | HA   | GLN | P | 161 | -3.667 | -9.427  | -2.002 | 0.00 | 0.00 | PROA |
| 2506 | ATOM | 2506 | CB   | GLN | P | 161 | -5.016 | -8.548  | -0.532 | 0.00 | 0.00 | PROA |
| 2507 | ATOM | 2507 | HB1  | GLN | P | 161 | -5.402 | -8.767  | 0.486  | 0.00 | 0.00 | PROA |
| 2508 | ATOM | 2508 | HB2  | GLN | P | 161 | -5.817 | -8.456  | -1.296 | 0.00 | 0.00 | PROA |
| 2509 | ATOM | 2509 | CG   | GLN | P | 161 | -4.401 | -7.117  | -0.383 | 0.00 | 0.00 | PROA |
| 2510 | ATOM | 2510 | HG1  | GLN | P | 161 | -3.697 | -6.931  | -1.223 | 0.00 | 0.00 | PROA |
| 2511 | ATOM | 2511 | HG2  | GLN | P | 161 | -3.692 | -7.039  | 0.469  | 0.00 | 0.00 | PROA |
| 2512 | ATOM | 2512 | CD   | GLN | P | 161 | -5.384 | -5.934  | -0.306 | 0.00 | 0.00 | PROA |
| 2513 | ATOM | 2513 | OE1  | GLN | P | 161 | -6.263 | -6.029  | 0.571  | 0.00 | 0.00 | PROA |
| 2514 | ATOM | 2514 | NE2  | GLN | P | 161 | -5.193 | -4.927  | -1.155 | 0.00 | 0.00 | PROA |
| 2515 | ATOM | 2515 | HE21 | GLN | P | 161 | -5.721 | -4.085  | -1.050 | 0.00 | 0.00 | PROA |
| 2516 | ATOM | 2516 | HE22 | GLN | P | 161 | -4.454 | -4.974  | -1.827 | 0.00 | 0.00 | PROA |
| 2517 | ATOM | 2517 | C    | GLN | P | 161 | -2.967 | -9.809  | -0.036 | 0.00 | 0.00 | PROA |
| 2518 | ATOM | 2518 | O    | GLN | P | 161 | -3.245 | -9.851  | 1.173  | 0.00 | 0.00 | PROA |
| 2519 | ATOM | 2519 | N    | THR | P | 162 | -1.712 | -9.679  | -0.472 | 0.00 | 0.00 | PROA |
| 2520 | ATOM | 2520 | HN   | THR | P | 162 | -1.618 | -9.561  | -1.458 | 0.00 | 0.00 | PROA |
| 2521 | ATOM | 2521 | CA   | THR | P | 162 | -0.531 | -9.870  | 0.382  | 0.00 | 0.00 | PROA |
| 2522 | ATOM | 2522 | HA   | THR | P | 162 | -0.800 | -10.321 | 1.326  | 0.00 | 0.00 | PROA |
| 2523 | ATOM | 2523 | CB   | THR | P | 162 | 0.633  | -10.607 | -0.337 | 0.00 | 0.00 | PROA |
| 2524 | ATOM | 2524 | HB   | THR | P | 162 | 0.845  | -10.152 | -1.329 | 0.00 | 0.00 | PROA |
| 2525 | ATOM | 2525 | OG1  | THR | P | 162 | 0.241  | -11.990 | -0.350 | 0.00 | 0.00 | PROA |
| 2526 | ATOM | 2526 | HG1  | THR | P | 162 | -0.244 | -12.148 | -1.164 | 0.00 | 0.00 | PROA |
| 2527 | ATOM | 2527 | CG2  | THR | P | 162 | 1.924  | -10.496 | 0.502  | 0.00 | 0.00 | PROA |
| 2528 | ATOM | 2528 | HG21 | THR | P | 162 | 1.702  | -10.816 | 1.543  | 0.00 | 0.00 | PROA |
| 2529 | ATOM | 2529 | HG22 | THR | P | 162 | 2.512  | -9.556  | 0.444  | 0.00 | 0.00 | PROA |
| 2530 | ATOM | 2530 | HG23 | THR | P | 162 | 2.782  | -11.108 | 0.152  | 0.00 | 0.00 | PROA |
| 2531 | ATOM | 2531 | C    | THR | P | 162 | -0.053 | -8.466  | 0.589  | 0.00 | 0.00 | PROA |
| 2532 | ATOM | 2532 | O    | THR | P | 162 | 0.172  | -7.695  | -0.325 | 0.00 | 0.00 | PROA |
| 2533 | ATOM | 2533 | N    | ASP | P | 163 | 0.257  | -8.128  | 1.791  | 0.00 | 0.00 | PROA |
| 2534 | ATOM | 2534 | HN   | ASP | P | 163 | 0.248  | -8.759  | 2.563  | 0.00 | 0.00 | PROA |
| 2535 | ATOM | 2535 | CA   | ASP | P | 163 | 0.601  | -6.774  | 2.194  | 0.00 | 0.00 | PROA |
| 2536 | ATOM | 2536 | HA   | ASP | P | 163 | -0.117 | -6.165  | 1.665  | 0.00 | 0.00 | PROA |
| 2537 | ATOM | 2537 | CB   | ASP | P | 163 | 0.159  | -6.570  | 3.626  | 0.00 | 0.00 | PROA |
| 2538 | ATOM | 2538 | HB1  | ASP | P | 163 | 0.812  | -7.217  | 4.251  | 0.00 | 0.00 | PROA |
| 2539 | ATOM | 2539 | HB2  | ASP | P | 163 | -0.884 | -6.926  | 3.765  | 0.00 | 0.00 | PROA |
| 2540 | ATOM | 2540 | CG   | ASP | P | 163 | 0.115  | -5.115  | 4.042  | 0.00 | 0.00 | PROA |
| 2541 | ATOM | 2541 | OD1  | ASP | P | 163 | 0.018  | -4.961  | 5.250  | 0.00 | 0.00 | PROA |
| 2542 | ATOM | 2542 | OD2  | ASP | P | 163 | 0.265  | -4.188  | 3.202  | 0.00 | 0.00 | PROA |
| 2543 | ATOM | 2543 | C    | ASP | P | 163 | 1.994  | -6.351  | 1.860  | 0.00 | 0.00 | PROA |
| 2544 | ATOM | 2544 | O    | ASP | P | 163 | 2.900  | -6.148  | 2.737  | 0.00 | 0.00 | PROA |
| 2545 | ATOM | 2545 | N    | ALA | P | 164 | 2.204  | -6.155  | 0.537  | 0.00 | 0.00 | PROA |
| 2546 | ATOM | 2546 | HN   | ALA | P | 164 | 1.498  | -6.630  | 0.018  | 0.00 | 0.00 | PROA |
| 2547 | ATOM | 2547 | CA   | ALA | P | 164 | 3.480  | -5.780  | 0.046  | 0.00 | 0.00 | PROA |
| 2548 | ATOM | 2548 | HA   | ALA | P | 164 | 3.956  | -5.178  | 0.805  | 0.00 | 0.00 | PROA |
| 2549 | ATOM | 2549 | CB   | ALA | P | 164 | 4.449  | -6.957  | -0.102 | 0.00 | 0.00 | PROA |
| 2550 | ATOM | 2550 | HB1  | ALA | P | 164 | 4.065  | -7.672  | -0.861 | 0.00 | 0.00 | PROA |
| 2551 | ATOM | 2551 | HB2  | ALA | P | 164 | 4.516  | -7.541  | 0.841  | 0.00 | 0.00 | PROA |
| 2552 | ATOM | 2552 | HB3  | ALA | P | 164 | 5.422  | -6.537  | -0.434 | 0.00 | 0.00 | PROA |
| 2553 | ATOM | 2553 | C    | ALA | P | 164 | 3.306  | -5.049  | -1.309 | 0.00 | 0.00 | PROA |
| 2554 | ATOM | 2554 | O    | ALA | P | 164 | 2.343  | -5.263  | -2.000 | 0.00 | 0.00 | PROA |
| 2555 | ATOM | 2555 | N    | ILE | P | 165 | 4.194  | -4.107  | -1.639 | 0.00 | 0.00 | PROA |

|      |      |      |      |     |   |     |        |        |         |      |      |      |
|------|------|------|------|-----|---|-----|--------|--------|---------|------|------|------|
| 2556 | ATOM | 2556 | HN   | ILE | P | 165 | 4.848  | -3.838 | -0.936  | 0.00 | 0.00 | PROA |
| 2557 | ATOM | 2557 | CA   | ILE | P | 165 | 4.250  | -3.375 | -2.909  | 0.00 | 0.00 | PROA |
| 2558 | ATOM | 2558 | HA   | ILE | P | 165 | 3.226  | -3.207 | -3.208  | 0.00 | 0.00 | PROA |
| 2559 | ATOM | 2559 | CB   | ILE | P | 165 | 4.951  | -1.997 | -2.804  | 0.00 | 0.00 | PROA |
| 2560 | ATOM | 2560 | HB   | ILE | P | 165 | 5.955  | -2.012 | -2.328  | 0.00 | 0.00 | PROA |
| 2561 | ATOM | 2561 | CG2  | ILE | P | 165 | 4.984  | -1.168 | -4.133  | 0.00 | 0.00 | PROA |
| 2562 | ATOM | 2562 | HG21 | ILE | P | 165 | 5.780  | -1.628 | -4.758  | 0.00 | 0.00 | PROA |
| 2563 | ATOM | 2563 | HG22 | ILE | P | 165 | 5.149  | -0.108 | -3.844  | 0.00 | 0.00 | PROA |
| 2564 | ATOM | 2564 | HG23 | ILE | P | 165 | 4.010  | -1.297 | -4.651  | 0.00 | 0.00 | PROA |
| 2565 | ATOM | 2565 | CG1  | ILE | P | 165 | 4.155  | -1.134 | -1.746  | 0.00 | 0.00 | PROA |
| 2566 | ATOM | 2566 | HG11 | ILE | P | 165 | 4.684  | -0.158 | -1.694  | 0.00 | 0.00 | PROA |
| 2567 | ATOM | 2567 | HG12 | ILE | P | 165 | 4.118  | -1.662 | -0.769  | 0.00 | 0.00 | PROA |
| 2568 | ATOM | 2568 | CD   | ILE | P | 165 | 2.711  | -0.902 | -2.090  | 0.00 | 0.00 | PROA |
| 2569 | ATOM | 2569 | HD1  | ILE | P | 165 | 2.117  | -1.793 | -2.386  | 0.00 | 0.00 | PROA |
| 2570 | ATOM | 2570 | HD2  | ILE | P | 165 | 2.657  | -0.113 | -2.872  | 0.00 | 0.00 | PROA |
| 2571 | ATOM | 2571 | HD3  | ILE | P | 165 | 2.117  | -0.394 | -1.301  | 0.00 | 0.00 | PROA |
| 2572 | ATOM | 2572 | C    | ILE | P | 165 | 5.025  | -4.163 | -3.992  | 0.00 | 0.00 | PROA |
| 2573 | ATOM | 2573 | O    | ILE | P | 165 | 6.157  | -4.605 | -3.885  | 0.00 | 0.00 | PROA |
| 2574 | ATOM | 2574 | N    | ILE | P | 166 | 4.444  | -4.373 | -5.184  | 0.00 | 0.00 | PROA |
| 2575 | ATOM | 2575 | HN   | ILE | P | 166 | 3.473  | -4.158 | -5.263  | 0.00 | 0.00 | PROA |
| 2576 | ATOM | 2576 | CA   | ILE | P | 166 | 5.031  | -5.169 | -6.294  | 0.00 | 0.00 | PROA |
| 2577 | ATOM | 2577 | HA   | ILE | P | 166 | 5.176  | -6.145 | -5.854  | 0.00 | 0.00 | PROA |
| 2578 | ATOM | 2578 | CB   | ILE | P | 166 | 4.018  | -5.280 | -7.457  | 0.00 | 0.00 | PROA |
| 2579 | ATOM | 2579 | HB   | ILE | P | 166 | 4.341  | -5.981 | -8.257  | 0.00 | 0.00 | PROA |
| 2580 | ATOM | 2580 | CG2  | ILE | P | 166 | 2.626  | -5.771 | -6.919  | 0.00 | 0.00 | PROA |
| 2581 | ATOM | 2581 | HG21 | ILE | P | 166 | 2.093  | -5.030 | -6.285  | 0.00 | 0.00 | PROA |
| 2582 | ATOM | 2582 | HG22 | ILE | P | 166 | 2.727  | -6.744 | -6.392  | 0.00 | 0.00 | PROA |
| 2583 | ATOM | 2583 | HG23 | ILE | P | 166 | 1.941  | -5.987 | -7.766  | 0.00 | 0.00 | PROA |
| 2584 | ATOM | 2584 | CG1  | ILE | P | 166 | 3.782  | -3.907 | -8.124  | 0.00 | 0.00 | PROA |
| 2585 | ATOM | 2585 | HG11 | ILE | P | 166 | 4.784  | -3.496 | -8.370  | 0.00 | 0.00 | PROA |
| 2586 | ATOM | 2586 | HG12 | ILE | P | 166 | 3.159  | -3.172 | -7.570  | 0.00 | 0.00 | PROA |
| 2587 | ATOM | 2587 | CD   | ILE | P | 166 | 3.191  | -4.179 | -9.515  | 0.00 | 0.00 | PROA |
| 2588 | ATOM | 2588 | HD1  | ILE | P | 166 | 3.127  | -3.234 | -10.096 | 0.00 | 0.00 | PROA |
| 2589 | ATOM | 2589 | HD2  | ILE | P | 166 | 2.229  | -4.723 | -9.398  | 0.00 | 0.00 | PROA |
| 2590 | ATOM | 2590 | HD3  | ILE | P | 166 | 3.815  | -4.934 | -10.040 | 0.00 | 0.00 | PROA |
| 2591 | ATOM | 2591 | C    | ILE | P | 166 | 6.434  | -4.885 | -6.845  | 0.00 | 0.00 | PROA |
| 2592 | ATOM | 2592 | O    | ILE | P | 166 | 6.988  | -3.767 | -6.816  | 0.00 | 0.00 | PROA |
| 2593 | ATOM | 2593 | N    | ASN | P | 167 | 7.143  | -6.001 | -7.234  | 0.00 | 0.00 | PROA |
| 2594 | ATOM | 2594 | HN   | ASN | P | 167 | 6.781  | -6.862 | -6.886  | 0.00 | 0.00 | PROA |
| 2595 | ATOM | 2595 | CA   | ASN | P | 167 | 8.347  | -6.069 | -8.004  | 0.00 | 0.00 | PROA |
| 2596 | ATOM | 2596 | HA   | ASN | P | 167 | 8.855  | -5.120 | -7.909  | 0.00 | 0.00 | PROA |
| 2597 | ATOM | 2597 | CB   | ASN | P | 167 | 9.330  | -7.160 | -7.457  | 0.00 | 0.00 | PROA |
| 2598 | ATOM | 2598 | HB1  | ASN | P | 167 | 10.192 | -7.278 | -8.148  | 0.00 | 0.00 | PROA |
| 2599 | ATOM | 2599 | HB2  | ASN | P | 167 | 8.940  | -8.178 | -7.243  | 0.00 | 0.00 | PROA |
| 2600 | ATOM | 2600 | CG   | ASN | P | 167 | 9.979  | -6.679 | -6.210  | 0.00 | 0.00 | PROA |
| 2601 | ATOM | 2601 | OD1  | ASN | P | 167 | 11.193 | -6.359 | -6.163  | 0.00 | 0.00 | PROA |
| 2602 | ATOM | 2602 | ND2  | ASN | P | 167 | 9.181  | -6.622 | -5.133  | 0.00 | 0.00 | PROA |
| 2603 | ATOM | 2603 | HD21 | ASN | P | 167 | 8.305  | -7.105 | -5.127  | 0.00 | 0.00 | PROA |
| 2604 | ATOM | 2604 | HD22 | ASN | P | 167 | 9.538  | -6.418 | -4.221  | 0.00 | 0.00 | PROA |
| 2605 | ATOM | 2605 | C    | ASN | P | 167 | 8.067  | -6.442 | -9.428  | 0.00 | 0.00 | PROA |
| 2606 | ATOM | 2606 | O    | ASN | P | 167 | 7.175  | -7.259 | -9.673  | 0.00 | 0.00 | PROA |
| 2607 | ATOM | 2607 | N    | TYR | P | 168 | 8.862  | -5.931 | -10.394 | 0.00 | 0.00 | PROA |
| 2608 | ATOM | 2608 | HN   | TYR | P | 168 | 9.606  | -5.294 | -10.206 | 0.00 | 0.00 | PROA |
| 2609 | ATOM | 2609 | CA   | TYR | P | 168 | 8.652  | -6.038 | -11.847 | 0.00 | 0.00 | PROA |
| 2610 | ATOM | 2610 | HA   | TYR | P | 168 | 7.664  | -5.680 | -12.094 | 0.00 | 0.00 | PROA |
| 2611 | ATOM | 2611 | CB   | TYR | P | 168 | 9.719  | -5.227 | -12.609 | 0.00 | 0.00 | PROA |
| 2612 | ATOM | 2612 | HB1  | TYR | P | 168 | 10.798 | -5.428 | -12.437 | 0.00 | 0.00 | PROA |
| 2613 | ATOM | 2613 | HB2  | TYR | P | 168 | 9.412  | -4.237 | -12.209 | 0.00 | 0.00 | PROA |
| 2614 | ATOM | 2614 | CG   | TYR | P | 168 | 9.601  | -5.137 | -14.115 | 0.00 | 0.00 | PROA |
| 2615 | ATOM | 2615 | CD1  | TYR | P | 168 | 10.323 | -6.057 | -14.853 | 0.00 | 0.00 | PROA |
| 2616 | ATOM | 2616 | HD1  | TYR | P | 168 | 10.952 | -6.756 | -14.323 | 0.00 | 0.00 | PROA |
| 2617 | ATOM | 2617 | CE1  | TYR | P | 168 | 10.293 | -6.009 | -16.277 | 0.00 | 0.00 | PROA |
| 2618 | ATOM | 2618 | HE1  | TYR | P | 168 | 10.916 | -6.716 | -16.803 | 0.00 | 0.00 | PROA |
| 2619 | ATOM | 2619 | CZ   | TYR | P | 168 | 9.623  | -4.992 | -16.904 | 0.00 | 0.00 | PROA |
| 2620 | ATOM | 2620 | OH   | TYR | P | 168 | 9.643  | -4.900 | -18.404 | 0.00 | 0.00 | PROA |
| 2621 | ATOM | 2621 | HH   | TYR | P | 168 | 9.878  | -5.770 | -18.735 | 0.00 | 0.00 | PROA |
| 2622 | ATOM | 2622 | CD2  | TYR | P | 168 | 8.804  | -4.159 | -14.746 | 0.00 | 0.00 | PROA |
| 2623 | ATOM | 2623 | HD2  | TYR | P | 168 | 8.176  | -3.465 | -14.207 | 0.00 | 0.00 | PROA |
| 2624 | ATOM | 2624 | CE2  | TYR | P | 168 | 8.823  | -4.125 | -16.130 | 0.00 | 0.00 | PROA |
| 2625 | ATOM | 2625 | HE2  | TYR | P | 168 | 8.342  | -3.229 | -16.493 | 0.00 | 0.00 | PROA |
| 2626 | ATOM | 2626 | C    | TYR | P | 168 | 8.683  | -7.477 | -12.302 | 0.00 | 0.00 | PROA |
| 2627 | ATOM | 2627 | O    | TYR | P | 168 | 9.559  | -8.269 | -11.922 | 0.00 | 0.00 | PROA |
| 2628 | ATOM | 2628 | N    | GLY | P | 169 | 7.746  | -7.929 | -13.140 | 0.00 | 0.00 | PROA |

|      |      |      |      |     |   |     |        |         |         |      |      |      |
|------|------|------|------|-----|---|-----|--------|---------|---------|------|------|------|
| 2629 | ATOM | 2629 | HN   | GLY | P | 169 | 6.991  | -7.357  | -13.452 | 0.00 | 0.00 | PROA |
| 2630 | ATOM | 2630 | CA   | GLY | P | 169 | 7.809  | -9.298  | -13.745 | 0.00 | 0.00 | PROA |
| 2631 | ATOM | 2631 | HA1  | GLY | P | 169 | 8.732  | -9.442  | -14.288 | 0.00 | 0.00 | PROA |
| 2632 | ATOM | 2632 | HA2  | GLY | P | 169 | 7.003  | -9.322  | -14.463 | 0.00 | 0.00 | PROA |
| 2633 | ATOM | 2633 | C    | GLY | P | 169 | 7.468  | -10.400 | -12.809 | 0.00 | 0.00 | PROA |
| 2634 | ATOM | 2634 | O    | GLY | P | 169 | 7.771  | -11.577 | -12.955 | 0.00 | 0.00 | PROA |
| 2635 | ATOM | 2635 | N    | ASN | P | 170 | 6.771  | -10.091 | -11.749 | 0.00 | 0.00 | PROA |
| 2636 | ATOM | 2636 | HN   | ASN | P | 170 | 6.389  | -9.172  | -11.692 | 0.00 | 0.00 | PROA |
| 2637 | ATOM | 2637 | CA   | ASN | P | 170 | 6.238  | -11.104 | -10.903 | 0.00 | 0.00 | PROA |
| 2638 | ATOM | 2638 | HA   | ASN | P | 170 | 6.920  | -11.927 | -10.755 | 0.00 | 0.00 | PROA |
| 2639 | ATOM | 2639 | CB   | ASN | P | 170 | 6.125  | -10.445 | -9.466  | 0.00 | 0.00 | PROA |
| 2640 | ATOM | 2640 | HB1  | ASN | P | 170 | 5.411  | -11.040 | -8.859  | 0.00 | 0.00 | PROA |
| 2641 | ATOM | 2641 | HB2  | ASN | P | 170 | 5.595  | -9.478  | -9.602  | 0.00 | 0.00 | PROA |
| 2642 | ATOM | 2642 | CG   | ASN | P | 170 | 7.410  | -10.281 | -8.579  | 0.00 | 0.00 | PROA |
| 2643 | ATOM | 2643 | OD1  | ASN | P | 170 | 7.314  | -10.159 | -7.329  | 0.00 | 0.00 | PROA |
| 2644 | ATOM | 2644 | ND2  | ASN | P | 170 | 8.659  | -10.467 | -9.102  | 0.00 | 0.00 | PROA |
| 2645 | ATOM | 2645 | HD21 | ASN | P | 170 | 8.592  | -10.427 | -10.099 | 0.00 | 0.00 | PROA |
| 2646 | ATOM | 2646 | HD22 | ASN | P | 170 | 9.420  | -10.301 | -8.476  | 0.00 | 0.00 | PROA |
| 2647 | ATOM | 2647 | C    | ASN | P | 170 | 4.920  | -11.649 | -11.362 | 0.00 | 0.00 | PROA |
| 2648 | ATOM | 2648 | O    | ASN | P | 170 | 4.561  | -12.807 | -11.153 | 0.00 | 0.00 | PROA |
| 2649 | ATOM | 2649 | N    | SER | P | 171 | 4.109  | -10.863 | -12.105 | 0.00 | 0.00 | PROA |
| 2650 | ATOM | 2650 | HN   | SER | P | 171 | 4.319  | -9.891  | -12.174 | 0.00 | 0.00 | PROA |
| 2651 | ATOM | 2651 | CA   | SER | P | 171 | 2.746  | -11.213 | -12.598 | 0.00 | 0.00 | PROA |
| 2652 | ATOM | 2652 | HA   | SER | P | 171 | 2.152  | -11.445 | -11.726 | 0.00 | 0.00 | PROA |
| 2653 | ATOM | 2653 | CB   | SER | P | 171 | 2.043  | -10.021 | -13.231 | 0.00 | 0.00 | PROA |
| 2654 | ATOM | 2654 | HB1  | SER | P | 171 | 2.520  | -9.794  | -14.208 | 0.00 | 0.00 | PROA |
| 2655 | ATOM | 2655 | HB2  | SER | P | 171 | 2.240  | -9.169  | -12.546 | 0.00 | 0.00 | PROA |
| 2656 | ATOM | 2656 | OG   | SER | P | 171 | 0.691  | -10.279 | -13.421 | 0.00 | 0.00 | PROA |
| 2657 | ATOM | 2657 | HG1  | SER | P | 171 | 0.589  | -10.984 | -14.064 | 0.00 | 0.00 | PROA |
| 2658 | ATOM | 2658 | C    | SER | P | 171 | 2.817  | -12.424 | -13.616 | 0.00 | 0.00 | PROA |
| 2659 | ATOM | 2659 | O    | SER | P | 171 | 3.725  | -12.587 | -14.466 | 0.00 | 0.00 | PROA |
| 2660 | ATOM | 2660 | N    | GLY | P | 172 | 1.793  | -13.315 | -13.505 | 0.00 | 0.00 | PROA |
| 2661 | ATOM | 2661 | HN   | GLY | P | 172 | 0.947  | -13.135 | -13.009 | 0.00 | 0.00 | PROA |
| 2662 | ATOM | 2662 | CA   | GLY | P | 172 | 1.864  | -14.592 | -14.250 | 0.00 | 0.00 | PROA |
| 2663 | ATOM | 2663 | HA1  | GLY | P | 172 | 2.494  | -14.554 | -15.126 | 0.00 | 0.00 | PROA |
| 2664 | ATOM | 2664 | HA2  | GLY | P | 172 | 0.839  | -14.777 | -14.535 | 0.00 | 0.00 | PROA |
| 2665 | ATOM | 2665 | C    | GLY | P | 172 | 2.386  | -15.731 | -13.393 | 0.00 | 0.00 | PROA |
| 2666 | ATOM | 2666 | O    | GLY | P | 172 | 1.896  | -16.875 | -13.367 | 0.00 | 0.00 | PROA |
| 2667 | ATOM | 2667 | N    | GLY | P | 173 | 3.424  | -15.466 | -12.555 | 0.00 | 0.00 | PROA |
| 2668 | ATOM | 2668 | HN   | GLY | P | 173 | 3.896  | -14.590 | -12.617 | 0.00 | 0.00 | PROA |
| 2669 | ATOM | 2669 | CA   | GLY | P | 173 | 4.030  | -16.494 | -11.673 | 0.00 | 0.00 | PROA |
| 2670 | ATOM | 2670 | HA1  | GLY | P | 173 | 4.883  | -15.962 | -11.280 | 0.00 | 0.00 | PROA |
| 2671 | ATOM | 2671 | HA2  | GLY | P | 173 | 4.149  | -17.465 | -12.130 | 0.00 | 0.00 | PROA |
| 2672 | ATOM | 2672 | C    | GLY | P | 173 | 3.226  | -16.799 | -10.448 | 0.00 | 0.00 | PROA |
| 2673 | ATOM | 2673 | O    | GLY | P | 173 | 2.167  | -16.257 | -10.222 | 0.00 | 0.00 | PROA |
| 2674 | ATOM | 2674 | N    | PRO | P | 174 | 3.738  | -17.770 | -9.731  | 0.00 | 0.00 | PROA |
| 2675 | ATOM | 2675 | CD   | PRO | P | 174 | 5.006  | -18.480 | -9.935  | 0.00 | 0.00 | PROA |
| 2676 | ATOM | 2676 | HD1  | PRO | P | 174 | 5.899  | -17.830 | -9.810  | 0.00 | 0.00 | PROA |
| 2677 | ATOM | 2677 | HD2  | PRO | P | 174 | 5.042  | -19.059 | -10.882 | 0.00 | 0.00 | PROA |
| 2678 | ATOM | 2678 | CA   | PRO | P | 174 | 3.072  | -18.180 | -8.520  | 0.00 | 0.00 | PROA |
| 2679 | ATOM | 2679 | HA   | PRO | P | 174 | 2.025  | -18.261 | -8.769  | 0.00 | 0.00 | PROA |
| 2680 | ATOM | 2680 | CB   | PRO | P | 174 | 3.662  | -19.597 | -8.329  | 0.00 | 0.00 | PROA |
| 2681 | ATOM | 2681 | HB1  | PRO | P | 174 | 3.305  | -20.302 | -9.109  | 0.00 | 0.00 | PROA |
| 2682 | ATOM | 2682 | HB2  | PRO | P | 174 | 3.642  | -19.960 | -7.279  | 0.00 | 0.00 | PROA |
| 2683 | ATOM | 2683 | CG   | PRO | P | 174 | 5.108  | -19.478 | -8.743  | 0.00 | 0.00 | PROA |
| 2684 | ATOM | 2684 | HG1  | PRO | P | 174 | 5.712  | -18.907 | -8.006  | 0.00 | 0.00 | PROA |
| 2685 | ATOM | 2685 | HG2  | PRO | P | 174 | 5.552  | -20.444 | -9.067  | 0.00 | 0.00 | PROA |
| 2686 | ATOM | 2686 | C    | PRO | P | 174 | 3.295  | -17.387 | -7.220  | 0.00 | 0.00 | PROA |
| 2687 | ATOM | 2687 | O    | PRO | P | 174 | 4.378  | -16.911 | -7.061  | 0.00 | 0.00 | PROA |
| 2688 | ATOM | 2688 | N    | LEU | P | 175 | 2.275  | -17.408 | -6.381  | 0.00 | 0.00 | PROA |
| 2689 | ATOM | 2689 | HN   | LEU | P | 175 | 1.409  | -17.831 | -6.636  | 0.00 | 0.00 | PROA |
| 2690 | ATOM | 2690 | CA   | LEU | P | 175 | 2.320  | -17.066 | -5.032  | 0.00 | 0.00 | PROA |
| 2691 | ATOM | 2691 | HA   | LEU | P | 175 | 3.155  | -16.406 | -4.850  | 0.00 | 0.00 | PROA |
| 2692 | ATOM | 2692 | CB   | LEU | P | 175 | 0.999  | -16.329 | -4.463  | 0.00 | 0.00 | PROA |
| 2693 | ATOM | 2693 | HB1  | LEU | P | 175 | 0.121  | -16.981 | -4.660  | 0.00 | 0.00 | PROA |
| 2694 | ATOM | 2694 | HB2  | LEU | P | 175 | 0.864  | -15.491 | -5.180  | 0.00 | 0.00 | PROA |
| 2695 | ATOM | 2695 | CG   | LEU | P | 175 | 0.980  | -15.851 | -2.990  | 0.00 | 0.00 | PROA |
| 2696 | ATOM | 2696 | HG   | LEU | P | 175 | 1.335  | -16.729 | -2.411  | 0.00 | 0.00 | PROA |
| 2697 | ATOM | 2697 | CD1  | LEU | P | 175 | 1.907  | -14.672 | -2.779  | 0.00 | 0.00 | PROA |
| 2698 | ATOM | 2698 | HD11 | LEU | P | 175 | 2.288  | -14.557 | -1.742  | 0.00 | 0.00 | PROA |
| 2699 | ATOM | 2699 | HD12 | LEU | P | 175 | 1.365  | -13.753 | -3.088  | 0.00 | 0.00 | PROA |
| 2700 | ATOM | 2700 | HD13 | LEU | P | 175 | 2.696  | -14.707 | -3.561  | 0.00 | 0.00 | PROA |
| 2701 | ATOM | 2701 | CD2  | LEU | P | 175 | -0.437 | -15.572 | -2.406  | 0.00 | 0.00 | PROA |

|      |      |      |      |     |   |     |        |         |        |      |      |      |
|------|------|------|------|-----|---|-----|--------|---------|--------|------|------|------|
| 2702 | ATOM | 2702 | HD21 | LEU | P | 175 | -1.128 | -16.290 | -2.897 | 0.00 | 0.00 | PROA |
| 2703 | ATOM | 2703 | HD22 | LEU | P | 175 | -0.687 | -14.562 | -2.798 | 0.00 | 0.00 | PROA |
| 2704 | ATOM | 2704 | HD23 | LEU | P | 175 | -0.581 | -15.543 | -1.305 | 0.00 | 0.00 | PROA |
| 2705 | ATOM | 2705 | C    | LEU | P | 175 | 2.448  | -18.330 | -4.224 | 0.00 | 0.00 | PROA |
| 2706 | ATOM | 2706 | O    | LEU | P | 175 | 1.710  | -19.291 | -4.361 | 0.00 | 0.00 | PROA |
| 2707 | ATOM | 2707 | N    | VAL | P | 176 | 3.509  | -18.415 | -3.369 | 0.00 | 0.00 | PROA |
| 2708 | ATOM | 2708 | HN   | VAL | P | 176 | 4.165  | -17.682 | -3.207 | 0.00 | 0.00 | PROA |
| 2709 | ATOM | 2709 | CA   | VAL | P | 176 | 3.894  | -19.718 | -2.830 | 0.00 | 0.00 | PROA |
| 2710 | ATOM | 2710 | HA   | VAL | P | 176 | 3.231  | -20.493 | -3.186 | 0.00 | 0.00 | PROA |
| 2711 | ATOM | 2711 | CB   | VAL | P | 176 | 5.297  | -20.104 | -3.341 | 0.00 | 0.00 | PROA |
| 2712 | ATOM | 2712 | HB   | VAL | P | 176 | 6.128  | -19.452 | -2.996 | 0.00 | 0.00 | PROA |
| 2713 | ATOM | 2713 | CG1  | VAL | P | 176 | 5.637  | -21.599 | -3.040 | 0.00 | 0.00 | PROA |
| 2714 | ATOM | 2714 | HG11 | VAL | P | 176 | 6.531  | -21.927 | -3.612 | 0.00 | 0.00 | PROA |
| 2715 | ATOM | 2715 | HG12 | VAL | P | 176 | 4.771  | -22.269 | -3.228 | 0.00 | 0.00 | PROA |
| 2716 | ATOM | 2716 | HG13 | VAL | P | 176 | 5.746  | -21.599 | -1.935 | 0.00 | 0.00 | PROA |
| 2717 | ATOM | 2717 | CG2  | VAL | P | 176 | 5.328  | -19.806 | -4.913 | 0.00 | 0.00 | PROA |
| 2718 | ATOM | 2718 | HG21 | VAL | P | 176 | 4.324  | -20.134 | -5.257 | 0.00 | 0.00 | PROA |
| 2719 | ATOM | 2719 | HG22 | VAL | P | 176 | 6.106  | -20.433 | -5.399 | 0.00 | 0.00 | PROA |
| 2720 | ATOM | 2720 | HG23 | VAL | P | 176 | 5.351  | -18.741 | -5.230 | 0.00 | 0.00 | PROA |
| 2721 | ATOM | 2721 | C    | VAL | P | 176 | 3.911  | -19.596 | -1.302 | 0.00 | 0.00 | PROA |
| 2722 | ATOM | 2722 | O    | VAL | P | 176 | 4.362  | -18.599 | -0.721 | 0.00 | 0.00 | PROA |
| 2723 | ATOM | 2723 | N    | ASN | P | 177 | 3.433  | -20.584 | -0.593 | 0.00 | 0.00 | PROA |
| 2724 | ATOM | 2724 | HN   | ASN | P | 177 | 3.049  | -21.380 | -1.054 | 0.00 | 0.00 | PROA |
| 2725 | ATOM | 2725 | CA   | ASN | P | 177 | 3.540  | -20.503 | 0.837  | 0.00 | 0.00 | PROA |
| 2726 | ATOM | 2726 | HA   | ASN | P | 177 | 3.397  | -19.489 | 1.181  | 0.00 | 0.00 | PROA |
| 2727 | ATOM | 2727 | CB   | ASN | P | 177 | 2.381  | -21.291 | 1.576  | 0.00 | 0.00 | PROA |
| 2728 | ATOM | 2728 | HB1  | ASN | P | 177 | 1.475  | -20.858 | 1.102  | 0.00 | 0.00 | PROA |
| 2729 | ATOM | 2729 | HB2  | ASN | P | 177 | 2.363  | -21.168 | 2.680  | 0.00 | 0.00 | PROA |
| 2730 | ATOM | 2730 | CG   | ASN | P | 177 | 2.395  | -22.776 | 1.235  | 0.00 | 0.00 | PROA |
| 2731 | ATOM | 2731 | OD1  | ASN | P | 177 | 3.191  | -23.359 | 0.543  | 0.00 | 0.00 | PROA |
| 2732 | ATOM | 2732 | ND2  | ASN | P | 177 | 1.371  | -23.486 | 1.690  | 0.00 | 0.00 | PROA |
| 2733 | ATOM | 2733 | HD21 | ASN | P | 177 | 1.374  | -24.465 | 1.485  | 0.00 | 0.00 | PROA |
| 2734 | ATOM | 2734 | HD22 | ASN | P | 177 | 0.636  | -22.988 | 2.149  | 0.00 | 0.00 | PROA |
| 2735 | ATOM | 2735 | C    | ASN | P | 177 | 4.909  | -21.067 | 1.281  | 0.00 | 0.00 | PROA |
| 2736 | ATOM | 2736 | O    | ASN | P | 177 | 5.683  | -21.506 | 0.443  | 0.00 | 0.00 | PROA |
| 2737 | ATOM | 2737 | N    | LEU | P | 178 | 5.286  | -21.024 | 2.575  | 0.00 | 0.00 | PROA |
| 2738 | ATOM | 2738 | HN   | LEU | P | 178 | 4.858  | -20.650 | 3.395  | 0.00 | 0.00 | PROA |
| 2739 | ATOM | 2739 | CA   | LEU | P | 178 | 6.590  | -21.497 | 2.937  | 0.00 | 0.00 | PROA |
| 2740 | ATOM | 2740 | HA   | LEU | P | 178 | 7.330  | -21.198 | 2.209  | 0.00 | 0.00 | PROA |
| 2741 | ATOM | 2741 | CB   | LEU | P | 178 | 6.918  | -20.730 | 4.262  | 0.00 | 0.00 | PROA |
| 2742 | ATOM | 2742 | HB1  | LEU | P | 178 | 7.847  | -21.135 | 4.717  | 0.00 | 0.00 | PROA |
| 2743 | ATOM | 2743 | HB2  | LEU | P | 178 | 6.089  | -20.833 | 4.995  | 0.00 | 0.00 | PROA |
| 2744 | ATOM | 2744 | CG   | LEU | P | 178 | 7.296  | -19.238 | 4.039  | 0.00 | 0.00 | PROA |
| 2745 | ATOM | 2745 | HG   | LEU | P | 178 | 6.498  | -18.700 | 3.485  | 0.00 | 0.00 | PROA |
| 2746 | ATOM | 2746 | CD1  | LEU | P | 178 | 7.561  | -18.563 | 5.396  | 0.00 | 0.00 | PROA |
| 2747 | ATOM | 2747 | HD11 | LEU | P | 178 | 8.372  | -17.811 | 5.495  | 0.00 | 0.00 | PROA |
| 2748 | ATOM | 2748 | HD12 | LEU | P | 178 | 7.849  | -19.354 | 6.121  | 0.00 | 0.00 | PROA |
| 2749 | ATOM | 2749 | HD13 | LEU | P | 178 | 6.609  | -18.061 | 5.675  | 0.00 | 0.00 | PROA |
| 2750 | ATOM | 2750 | CD2  | LEU | P | 178 | 8.595  | -19.010 | 3.219  | 0.00 | 0.00 | PROA |
| 2751 | ATOM | 2751 | HD21 | LEU | P | 178 | 8.965  | -17.990 | 3.461  | 0.00 | 0.00 | PROA |
| 2752 | ATOM | 2752 | HD22 | LEU | P | 178 | 8.516  | -19.091 | 2.113  | 0.00 | 0.00 | PROA |
| 2753 | ATOM | 2753 | HD23 | LEU | P | 178 | 9.391  | -19.706 | 3.561  | 0.00 | 0.00 | PROA |
| 2754 | ATOM | 2754 | C    | LEU | P | 178 | 6.659  | -22.997 | 3.205  | 0.00 | 0.00 | PROA |
| 2755 | ATOM | 2755 | O    | LEU | P | 178 | 7.633  | -23.565 | 3.804  | 0.00 | 0.00 | PROA |
| 2756 | ATOM | 2756 | N    | ASP | P | 179 | 5.611  | -23.721 | 2.785  | 0.00 | 0.00 | PROA |
| 2757 | ATOM | 2757 | HN   | ASP | P | 179 | 4.872  | -23.150 | 2.435  | 0.00 | 0.00 | PROA |
| 2758 | ATOM | 2758 | CA   | ASP | P | 179 | 5.673  | -25.118 | 2.679  | 0.00 | 0.00 | PROA |
| 2759 | ATOM | 2759 | HA   | ASP | P | 179 | 6.296  | -25.585 | 3.428  | 0.00 | 0.00 | PROA |
| 2760 | ATOM | 2760 | CB   | ASP | P | 179 | 4.247  | -25.735 | 2.893  | 0.00 | 0.00 | PROA |
| 2761 | ATOM | 2761 | HB1  | ASP | P | 179 | 4.189  | -26.795 | 2.563  | 0.00 | 0.00 | PROA |
| 2762 | ATOM | 2762 | HB2  | ASP | P | 179 | 3.625  | -25.121 | 2.207  | 0.00 | 0.00 | PROA |
| 2763 | ATOM | 2763 | CG   | ASP | P | 179 | 3.867  | -25.558 | 4.324  | 0.00 | 0.00 | PROA |
| 2764 | ATOM | 2764 | OD1  | ASP | P | 179 | 2.653  | -25.666 | 4.727  | 0.00 | 0.00 | PROA |
| 2765 | ATOM | 2765 | OD2  | ASP | P | 179 | 4.737  | -25.311 | 5.239  | 0.00 | 0.00 | PROA |
| 2766 | ATOM | 2766 | C    | ASP | P | 179 | 6.174  | -25.446 | 1.257  | 0.00 | 0.00 | PROA |
| 2767 | ATOM | 2767 | O    | ASP | P | 179 | 6.974  | -26.351 | 1.166  | 0.00 | 0.00 | PROA |
| 2768 | ATOM | 2768 | N    | GLY | P | 180 | 5.751  | -24.727 | 0.166  | 0.00 | 0.00 | PROA |
| 2769 | ATOM | 2769 | HN   | GLY | P | 180 | 5.073  | -24.020 | 0.354  | 0.00 | 0.00 | PROA |
| 2770 | ATOM | 2770 | CA   | GLY | P | 180 | 6.289  | -24.809 | -1.222 | 0.00 | 0.00 | PROA |
| 2771 | ATOM | 2771 | HA1  | GLY | P | 180 | 6.991  | -25.627 | -1.289 | 0.00 | 0.00 | PROA |
| 2772 | ATOM | 2772 | HA2  | GLY | P | 180 | 6.659  | -23.820 | -1.446 | 0.00 | 0.00 | PROA |
| 2773 | ATOM | 2773 | C    | GLY | P | 180 | 5.127  | -25.035 | -2.148 | 0.00 | 0.00 | PROA |
| 2774 | ATOM | 2774 | O    | GLY | P | 180 | 5.255  | -25.400 | -3.294 | 0.00 | 0.00 | PROA |

|      |      |      |      |     |   |     |        |         |         |      |      |      |
|------|------|------|------|-----|---|-----|--------|---------|---------|------|------|------|
| 2775 | ATOM | 2775 | N    | GLU | P | 181 | 3.913  | -24.821 | -1.730  | 0.00 | 0.00 | PROA |
| 2776 | ATOM | 2776 | HN   | GLU | P | 181 | 3.698  | -24.504 | -0.810  | 0.00 | 0.00 | PROA |
| 2777 | ATOM | 2777 | CA   | GLU | P | 181 | 2.707  | -25.126 | -2.442  | 0.00 | 0.00 | PROA |
| 2778 | ATOM | 2778 | HA   | GLU | P | 181 | 2.875  | -25.934 | -3.139  | 0.00 | 0.00 | PROA |
| 2779 | ATOM | 2779 | CB   | GLU | P | 181 | 1.654  | -25.652 | -1.452  | 0.00 | 0.00 | PROA |
| 2780 | ATOM | 2780 | HB1  | GLU | P | 181 | 0.726  | -25.942 | -1.989  | 0.00 | 0.00 | PROA |
| 2781 | ATOM | 2781 | HB2  | GLU | P | 181 | 1.372  | -24.747 | -0.872  | 0.00 | 0.00 | PROA |
| 2782 | ATOM | 2782 | CG   | GLU | P | 181 | 2.119  | -26.761 | -0.512  | 0.00 | 0.00 | PROA |
| 2783 | ATOM | 2783 | HG1  | GLU | P | 181 | 2.931  | -26.286 | 0.079   | 0.00 | 0.00 | PROA |
| 2784 | ATOM | 2784 | HG2  | GLU | P | 181 | 2.520  | -27.672 | -1.005  | 0.00 | 0.00 | PROA |
| 2785 | ATOM | 2785 | CD   | GLU | P | 181 | 1.019  | -27.178 | 0.382   | 0.00 | 0.00 | PROA |
| 2786 | ATOM | 2786 | OE1  | GLU | P | 181 | 0.509  | -28.253 | 0.109   | 0.00 | 0.00 | PROA |
| 2787 | ATOM | 2787 | OE2  | GLU | P | 181 | 0.687  | -26.402 | 1.276   | 0.00 | 0.00 | PROA |
| 2788 | ATOM | 2788 | C    | GLU | P | 181 | 2.234  | -23.802 | -3.025  | 0.00 | 0.00 | PROA |
| 2789 | ATOM | 2789 | O    | GLU | P | 181 | 2.205  | -22.677 | -2.434  | 0.00 | 0.00 | PROA |
| 2790 | ATOM | 2790 | N    | VAL | P | 182 | 1.825  | -23.856 | -4.304  | 0.00 | 0.00 | PROA |
| 2791 | ATOM | 2791 | HN   | VAL | P | 182 | 1.881  | -24.781 | -4.672  | 0.00 | 0.00 | PROA |
| 2792 | ATOM | 2792 | CA   | VAL | P | 182 | 1.368  | -22.760 | -5.099  | 0.00 | 0.00 | PROA |
| 2793 | ATOM | 2793 | HA   | VAL | P | 182 | 1.976  | -21.896 | -4.874  | 0.00 | 0.00 | PROA |
| 2794 | ATOM | 2794 | CB   | VAL | P | 182 | 1.415  | -23.008 | -6.556  | 0.00 | 0.00 | PROA |
| 2795 | ATOM | 2795 | HB   | VAL | P | 182 | 1.143  | -24.067 | -6.750  | 0.00 | 0.00 | PROA |
| 2796 | ATOM | 2796 | CG1  | VAL | P | 182 | 0.678  | -22.057 | -7.432  | 0.00 | 0.00 | PROA |
| 2797 | ATOM | 2797 | HG11 | VAL | P | 182 | -0.389 | -21.823 | -7.225  | 0.00 | 0.00 | PROA |
| 2798 | ATOM | 2798 | HG12 | VAL | P | 182 | 0.739  | -22.255 | -8.523  | 0.00 | 0.00 | PROA |
| 2799 | ATOM | 2799 | HG13 | VAL | P | 182 | 1.090  | -21.027 | -7.377  | 0.00 | 0.00 | PROA |
| 2800 | ATOM | 2800 | CG2  | VAL | P | 182 | 2.913  | -22.978 | -6.976  | 0.00 | 0.00 | PROA |
| 2801 | ATOM | 2801 | HG21 | VAL | P | 182 | 3.405  | -22.063 | -6.582  | 0.00 | 0.00 | PROA |
| 2802 | ATOM | 2802 | HG22 | VAL | P | 182 | 3.077  | -23.231 | -8.045  | 0.00 | 0.00 | PROA |
| 2803 | ATOM | 2803 | HG23 | VAL | P | 182 | 3.472  | -23.762 | -6.423  | 0.00 | 0.00 | PROA |
| 2804 | ATOM | 2804 | C    | VAL | P | 182 | -0.038 | -22.431 | -4.593  | 0.00 | 0.00 | PROA |
| 2805 | ATOM | 2805 | O    | VAL | P | 182 | -0.976 | -23.134 | -4.882  | 0.00 | 0.00 | PROA |
| 2806 | ATOM | 2806 | N    | ILE | P | 183 | -0.264 | -21.240 | -4.005  | 0.00 | 0.00 | PROA |
| 2807 | ATOM | 2807 | HN   | ILE | P | 183 | 0.533  | -20.804 | -3.594  | 0.00 | 0.00 | PROA |
| 2808 | ATOM | 2808 | CA   | ILE | P | 183 | -1.503 | -20.817 | -3.332  | 0.00 | 0.00 | PROA |
| 2809 | ATOM | 2809 | HA   | ILE | P | 183 | -2.173 | -21.663 | -3.281  | 0.00 | 0.00 | PROA |
| 2810 | ATOM | 2810 | CB   | ILE | P | 183 | -1.268 | -20.468 | -1.853  | 0.00 | 0.00 | PROA |
| 2811 | ATOM | 2811 | HB   | ILE | P | 183 | -2.231 | -20.046 | -1.495  | 0.00 | 0.00 | PROA |
| 2812 | ATOM | 2812 | CG2  | ILE | P | 183 | -1.216 | -21.794 | -1.027  | 0.00 | 0.00 | PROA |
| 2813 | ATOM | 2813 | HG21 | ILE | P | 183 | -0.452 | -22.527 | -1.363  | 0.00 | 0.00 | PROA |
| 2814 | ATOM | 2814 | HG22 | ILE | P | 183 | -2.207 | -22.296 | -1.043  | 0.00 | 0.00 | PROA |
| 2815 | ATOM | 2815 | HG23 | ILE | P | 183 | -0.982 | -21.703 | 0.055   | 0.00 | 0.00 | PROA |
| 2816 | ATOM | 2816 | CG1  | ILE | P | 183 | -0.020 | -19.582 | -1.663  | 0.00 | 0.00 | PROA |
| 2817 | ATOM | 2817 | HG11 | ILE | P | 183 | 0.306  | -19.037 | -2.575  | 0.00 | 0.00 | PROA |
| 2818 | ATOM | 2818 | HG12 | ILE | P | 183 | 0.886  | -20.214 | -1.540  | 0.00 | 0.00 | PROA |
| 2819 | ATOM | 2819 | CD   | ILE | P | 183 | -0.141 | -18.698 | -0.467  | 0.00 | 0.00 | PROA |
| 2820 | ATOM | 2820 | HD1  | ILE | P | 183 | 0.818  | -18.249 | -0.133  | 0.00 | 0.00 | PROA |
| 2821 | ATOM | 2821 | HD2  | ILE | P | 183 | -0.536 | -19.185 | 0.450   | 0.00 | 0.00 | PROA |
| 2822 | ATOM | 2822 | HD3  | ILE | P | 183 | -0.823 | -17.868 | -0.750  | 0.00 | 0.00 | PROA |
| 2823 | ATOM | 2823 | C    | ILE | P | 183 | -2.142 | -19.696 | -4.137  | 0.00 | 0.00 | PROA |
| 2824 | ATOM | 2824 | O    | ILE | P | 183 | -3.240 | -19.311 | -3.865  | 0.00 | 0.00 | PROA |
| 2825 | ATOM | 2825 | N    | GLY | P | 184 | -1.494 | -19.212 | -5.205  | 0.00 | 0.00 | PROA |
| 2826 | ATOM | 2826 | HN   | GLY | P | 184 | -0.609 | -19.648 | -5.347  | 0.00 | 0.00 | PROA |
| 2827 | ATOM | 2827 | CA   | GLY | P | 184 | -2.124 | -18.294 | -6.105  | 0.00 | 0.00 | PROA |
| 2828 | ATOM | 2828 | HA1  | GLY | P | 184 | -2.126 | -17.301 | -5.678  | 0.00 | 0.00 | PROA |
| 2829 | ATOM | 2829 | HA2  | GLY | P | 184 | -2.988 | -18.807 | -6.499  | 0.00 | 0.00 | PROA |
| 2830 | ATOM | 2830 | C    | GLY | P | 184 | -1.224 | -18.157 | -7.227  | 0.00 | 0.00 | PROA |
| 2831 | ATOM | 2831 | O    | GLY | P | 184 | -0.147 | -18.693 | -7.355  | 0.00 | 0.00 | PROA |
| 2832 | ATOM | 2832 | N    | ILE | P | 185 | -1.695 | -17.431 | -8.227  | 0.00 | 0.00 | PROA |
| 2833 | ATOM | 2833 | HN   | ILE | P | 185 | -2.570 | -16.971 | -8.099  | 0.00 | 0.00 | PROA |
| 2834 | ATOM | 2834 | CA   | ILE | P | 185 | -1.092 | -16.940 | -9.424  | 0.00 | 0.00 | PROA |
| 2835 | ATOM | 2835 | HA   | ILE | P | 185 | -0.044 | -17.176 | -9.313  | 0.00 | 0.00 | PROA |
| 2836 | ATOM | 2836 | CB   | ILE | P | 185 | -1.698 | -17.597 | -10.695 | 0.00 | 0.00 | PROA |
| 2837 | ATOM | 2837 | HB   | ILE | P | 185 | -1.455 | -18.681 | -10.662 | 0.00 | 0.00 | PROA |
| 2838 | ATOM | 2838 | CG2  | ILE | P | 185 | -3.184 | -17.475 | -10.661 | 0.00 | 0.00 | PROA |
| 2839 | ATOM | 2839 | HG21 | ILE | P | 185 | -3.691 | -18.115 | -11.415 | 0.00 | 0.00 | PROA |
| 2840 | ATOM | 2840 | HG22 | ILE | P | 185 | -3.446 | -16.417 | -10.876 | 0.00 | 0.00 | PROA |
| 2841 | ATOM | 2841 | HG23 | ILE | P | 185 | -3.716 | -17.874 | -9.771  | 0.00 | 0.00 | PROA |
| 2842 | ATOM | 2842 | CG1  | ILE | P | 185 | -1.180 | -17.121 | -12.063 | 0.00 | 0.00 | PROA |
| 2843 | ATOM | 2843 | HG11 | ILE | P | 185 | -0.083 | -17.254 | -11.948 | 0.00 | 0.00 | PROA |
| 2844 | ATOM | 2844 | HG12 | ILE | P | 185 | -1.397 | -16.040 | -12.204 | 0.00 | 0.00 | PROA |
| 2845 | ATOM | 2845 | CD   | ILE | P | 185 | -1.675 | -17.933 | -13.208 | 0.00 | 0.00 | PROA |
| 2846 | ATOM | 2846 | HD1  | ILE | P | 185 | -0.961 | -17.803 | -14.050 | 0.00 | 0.00 | PROA |
| 2847 | ATOM | 2847 | HD2  | ILE | P | 185 | -2.729 | -17.831 | -13.543 | 0.00 | 0.00 | PROA |

|      |      |      |      |     |   |     |        |         |         |      |      |      |
|------|------|------|------|-----|---|-----|--------|---------|---------|------|------|------|
| 2848 | ATOM | 2848 | HD3  | ILE | P | 185 | -1.624 | -19.005 | -12.921 | 0.00 | 0.00 | PROA |
| 2849 | ATOM | 2849 | C    | ILE | P | 185 | -1.173 | -15.390 | -9.433  | 0.00 | 0.00 | PROA |
| 2850 | ATOM | 2850 | O    | ILE | P | 185 | -2.197 | -14.866 | -9.144  | 0.00 | 0.00 | PROA |
| 2851 | ATOM | 2851 | N    | ASN | P | 186 | -0.038 | -14.710 | -9.645  | 0.00 | 0.00 | PROA |
| 2852 | ATOM | 2852 | HN   | ASN | P | 186 | 0.807  | -15.206 | -9.827  | 0.00 | 0.00 | PROA |
| 2853 | ATOM | 2853 | CA   | ASN | P | 186 | 0.008  | -13.271 | -9.436  | 0.00 | 0.00 | PROA |
| 2854 | ATOM | 2854 | HA   | ASN | P | 186 | -0.488 | -13.026 | -8.508  | 0.00 | 0.00 | PROA |
| 2855 | ATOM | 2855 | CB   | ASN | P | 186 | 1.458  | -12.769 | -9.270  | 0.00 | 0.00 | PROA |
| 2856 | ATOM | 2856 | HB1  | ASN | P | 186 | 1.449  | -11.684 | -9.032  | 0.00 | 0.00 | PROA |
| 2857 | ATOM | 2857 | HB2  | ASN | P | 186 | 1.996  | -12.996 | -10.215 | 0.00 | 0.00 | PROA |
| 2858 | ATOM | 2858 | CG   | ASN | P | 186 | 2.201  | -13.519 | -8.187  | 0.00 | 0.00 | PROA |
| 2859 | ATOM | 2859 | OD1  | ASN | P | 186 | 1.526  | -13.696 | -7.144  | 0.00 | 0.00 | PROA |
| 2860 | ATOM | 2860 | ND2  | ASN | P | 186 | 3.462  | -13.734 | -8.317  | 0.00 | 0.00 | PROA |
| 2861 | ATOM | 2861 | HD21 | ASN | P | 186 | 4.054  | -14.160 | -7.633  | 0.00 | 0.00 | PROA |
| 2862 | ATOM | 2862 | HD22 | ASN | P | 186 | 3.964  | -13.472 | -9.142  | 0.00 | 0.00 | PROA |
| 2863 | ATOM | 2863 | C    | ASN | P | 186 | -0.846 | -12.501 | -10.474 | 0.00 | 0.00 | PROA |
| 2864 | ATOM | 2864 | O    | ASN | P | 186 | -0.756 | -12.842 | -11.635 | 0.00 | 0.00 | PROA |
| 2865 | ATOM | 2865 | N    | THR | P | 187 | -1.554 | -11.404 | -10.121 | 0.00 | 0.00 | PROA |
| 2866 | ATOM | 2866 | HN   | THR | P | 187 | -1.575 | -11.048 | -9.190  | 0.00 | 0.00 | PROA |
| 2867 | ATOM | 2867 | CA   | THR | P | 187 | -2.069 | -10.509 | -11.181 | 0.00 | 0.00 | PROA |
| 2868 | ATOM | 2868 | HA   | THR | P | 187 | -1.690 | -10.841 | -12.136 | 0.00 | 0.00 | PROA |
| 2869 | ATOM | 2869 | CB   | THR | P | 187 | -3.588 | -10.537 | -11.408 | 0.00 | 0.00 | PROA |
| 2870 | ATOM | 2870 | HB   | THR | P | 187 | -3.821 | -11.491 | -11.928 | 0.00 | 0.00 | PROA |
| 2871 | ATOM | 2871 | OG1  | THR | P | 187 | -4.082 | -9.465  | -12.209 | 0.00 | 0.00 | PROA |
| 2872 | ATOM | 2872 | HG1  | THR | P | 187 | -4.412 | -9.917  | -12.989 | 0.00 | 0.00 | PROA |
| 2873 | ATOM | 2873 | CG2  | THR | P | 187 | -4.299 | -10.511 | -10.074 | 0.00 | 0.00 | PROA |
| 2874 | ATOM | 2874 | HG21 | THR | P | 187 | -3.926 | -9.697  | -9.417  | 0.00 | 0.00 | PROA |
| 2875 | ATOM | 2875 | HG22 | THR | P | 187 | -4.170 | -11.472 | -9.531  | 0.00 | 0.00 | PROA |
| 2876 | ATOM | 2876 | HG23 | THR | P | 187 | -5.365 | -10.381 | -10.358 | 0.00 | 0.00 | PROA |
| 2877 | ATOM | 2877 | C    | THR | P | 187 | -1.549 | -9.127  | -11.049 | 0.00 | 0.00 | PROA |
| 2878 | ATOM | 2878 | O    | THR | P | 187 | -1.537 | -8.577  | -9.989  | 0.00 | 0.00 | PROA |
| 2879 | ATOM | 2879 | N    | LEU | P | 188 | -0.993 | -8.481  | -12.118 | 0.00 | 0.00 | PROA |
| 2880 | ATOM | 2880 | HN   | LEU | P | 188 | -0.793 | -9.070  | -12.897 | 0.00 | 0.00 | PROA |
| 2881 | ATOM | 2881 | CA   | LEU | P | 188 | -0.656 | -7.044  | -12.219 | 0.00 | 0.00 | PROA |
| 2882 | ATOM | 2882 | HA   | LEU | P | 188 | -0.210 | -6.805  | -11.265 | 0.00 | 0.00 | PROA |
| 2883 | ATOM | 2883 | CB   | LEU | P | 188 | 0.316  | -6.805  | -13.335 | 0.00 | 0.00 | PROA |
| 2884 | ATOM | 2884 | HB1  | LEU | P | 188 | -0.023 | -7.341  | -14.247 | 0.00 | 0.00 | PROA |
| 2885 | ATOM | 2885 | HB2  | LEU | P | 188 | 1.252  | -7.381  | -13.170 | 0.00 | 0.00 | PROA |
| 2886 | ATOM | 2886 | CG   | LEU | P | 188 | 0.795  | -5.360  | -13.629 | 0.00 | 0.00 | PROA |
| 2887 | ATOM | 2887 | HG   | LEU | P | 188 | 0.635  | -4.808  | -12.678 | 0.00 | 0.00 | PROA |
| 2888 | ATOM | 2888 | CD1  | LEU | P | 188 | 2.329  | -5.375  | -13.756 | 0.00 | 0.00 | PROA |
| 2889 | ATOM | 2889 | HD11 | LEU | P | 188 | 2.744  | -4.429  | -14.165 | 0.00 | 0.00 | PROA |
| 2890 | ATOM | 2890 | HD12 | LEU | P | 188 | 2.692  | -6.163  | -14.450 | 0.00 | 0.00 | PROA |
| 2891 | ATOM | 2891 | HD13 | LEU | P | 188 | 2.824  | -5.521  | -12.772 | 0.00 | 0.00 | PROA |
| 2892 | ATOM | 2892 | CD2  | LEU | P | 188 | 0.039  | -4.686  | -14.706 | 0.00 | 0.00 | PROA |
| 2893 | ATOM | 2893 | HD21 | LEU | P | 188 | 0.085  | -5.353  | -15.593 | 0.00 | 0.00 | PROA |
| 2894 | ATOM | 2894 | HD22 | LEU | P | 188 | 0.515  | -3.716  | -14.962 | 0.00 | 0.00 | PROA |
| 2895 | ATOM | 2895 | HD23 | LEU | P | 188 | -1.020 | -4.448  | -14.470 | 0.00 | 0.00 | PROA |
| 2896 | ATOM | 2896 | C    | LEU | P | 188 | -1.788 | -6.126  | -12.352 | 0.00 | 0.00 | PROA |
| 2897 | ATOM | 2897 | O    | LEU | P | 188 | -2.688 | -6.144  | -13.211 | 0.00 | 0.00 | PROA |
| 2898 | ATOM | 2898 | N    | LYS | P | 189 | -2.023 | -5.262  | -11.305 | 0.00 | 0.00 | PROA |
| 2899 | ATOM | 2899 | HN   | LYS | P | 189 | -1.373 | -5.117  | -10.563 | 0.00 | 0.00 | PROA |
| 2900 | ATOM | 2900 | CA   | LYS | P | 189 | -3.099 | -4.310  | -11.373 | 0.00 | 0.00 | PROA |
| 2901 | ATOM | 2901 | HA   | LYS | P | 189 | -3.870 | -4.575  | -12.081 | 0.00 | 0.00 | PROA |
| 2902 | ATOM | 2902 | CB   | LYS | P | 189 | -3.777 | -4.213  | -10.021 | 0.00 | 0.00 | PROA |
| 2903 | ATOM | 2903 | HB1  | LYS | P | 189 | -4.660 | -3.540  | -10.083 | 0.00 | 0.00 | PROA |
| 2904 | ATOM | 2904 | HB2  | LYS | P | 189 | -3.043 | -3.808  | -9.292  | 0.00 | 0.00 | PROA |
| 2905 | ATOM | 2905 | CG   | LYS | P | 189 | -4.303 | -5.627  | -9.448  | 0.00 | 0.00 | PROA |
| 2906 | ATOM | 2906 | HG1  | LYS | P | 189 | -4.874 | -5.359  | -8.534  | 0.00 | 0.00 | PROA |
| 2907 | ATOM | 2907 | HG2  | LYS | P | 189 | -3.406 | -6.137  | -9.034  | 0.00 | 0.00 | PROA |
| 2908 | ATOM | 2908 | CD   | LYS | P | 189 | -4.982 | -6.613  | -10.394 | 0.00 | 0.00 | PROA |
| 2909 | ATOM | 2909 | HD1  | LYS | P | 189 | -5.351 | -7.425  | -9.732  | 0.00 | 0.00 | PROA |
| 2910 | ATOM | 2910 | HD2  | LYS | P | 189 | -4.226 | -6.950  | -11.135 | 0.00 | 0.00 | PROA |
| 2911 | ATOM | 2911 | CE   | LYS | P | 189 | -6.220 | -6.092  | -11.130 | 0.00 | 0.00 | PROA |
| 2912 | ATOM | 2912 | HE1  | LYS | P | 189 | -6.080 | -5.075  | -11.555 | 0.00 | 0.00 | PROA |
| 2913 | ATOM | 2913 | HE2  | LYS | P | 189 | -6.954 | -6.007  | -10.301 | 0.00 | 0.00 | PROA |
| 2914 | ATOM | 2914 | NZ   | LYS | P | 189 | -6.672 | -6.945  | -12.236 | 0.00 | 0.00 | PROA |
| 2915 | ATOM | 2915 | HZ1  | LYS | P | 189 | -6.897 | -7.943  | -12.046 | 0.00 | 0.00 | PROA |
| 2916 | ATOM | 2916 | HZ2  | LYS | P | 189 | -6.060 | -6.972  | -13.076 | 0.00 | 0.00 | PROA |
| 2917 | ATOM | 2917 | HZ3  | LYS | P | 189 | -7.603 | -6.619  | -12.565 | 0.00 | 0.00 | PROA |
| 2918 | ATOM | 2918 | C    | LYS | P | 189 | -2.444 | -2.967  | -11.712 | 0.00 | 0.00 | PROA |
| 2919 | ATOM | 2919 | O    | LYS | P | 189 | -1.332 | -2.625  | -11.249 | 0.00 | 0.00 | PROA |
| 2920 | ATOM | 2920 | N    | VAL | P | 190 | -3.181 | -2.183  | -12.546 | 0.00 | 0.00 | PROA |



|      |      |      |      |     |   |     |        |        |         |      |      |      |
|------|------|------|------|-----|---|-----|--------|--------|---------|------|------|------|
| 2921 | ATOM | 2921 | HN   | VAL | P | 190 | -4.030 | -2.582 | -12.884 | 0.00 | 0.00 | PROA |
| 2922 | ATOM | 2922 | CA   | VAL | P | 190 | -2.667 | -0.979 | -13.134 | 0.00 | 0.00 | PROA |
| 2923 | ATOM | 2923 | HA   | VAL | P | 190 | -1.747 | -1.292 | -13.604 | 0.00 | 0.00 | PROA |
| 2924 | ATOM | 2924 | CB   | VAL | P | 190 | -3.674 | -0.485 | -14.194 | 0.00 | 0.00 | PROA |
| 2925 | ATOM | 2925 | HB   | VAL | P | 190 | -3.681 | -1.280 | -14.970 | 0.00 | 0.00 | PROA |
| 2926 | ATOM | 2926 | CG1  | VAL | P | 190 | -5.146 | -0.252 | -13.684 | 0.00 | 0.00 | PROA |
| 2927 | ATOM | 2927 | HG11 | VAL | P | 190 | -5.717 | 0.343  | -14.428 | 0.00 | 0.00 | PROA |
| 2928 | ATOM | 2928 | HG12 | VAL | P | 190 | -5.192 | 0.355  | -12.754 | 0.00 | 0.00 | PROA |
| 2929 | ATOM | 2929 | HG13 | VAL | P | 190 | -5.674 | -1.214 | -13.510 | 0.00 | 0.00 | PROA |
| 2930 | ATOM | 2930 | CG2  | VAL | P | 190 | -3.178 | 0.855  | -14.792 | 0.00 | 0.00 | PROA |
| 2931 | ATOM | 2931 | HG21 | VAL | P | 190 | -3.539 | 1.709  | -14.180 | 0.00 | 0.00 | PROA |
| 2932 | ATOM | 2932 | HG22 | VAL | P | 190 | -3.591 | 1.019  | -15.811 | 0.00 | 0.00 | PROA |
| 2933 | ATOM | 2933 | HG23 | VAL | P | 190 | -2.068 | 0.880  | -14.824 | 0.00 | 0.00 | PROA |
| 2934 | ATOM | 2934 | C    | VAL | P | 190 | -2.357 | 0.057  | -12.119 | 0.00 | 0.00 | PROA |
| 2935 | ATOM | 2935 | O    | VAL | P | 190 | -1.247 | 0.626  | -12.049 | 0.00 | 0.00 | PROA |
| 2936 | ATOM | 2936 | N    | THR | P | 191 | -3.293 | 0.404  | -11.253 | 0.00 | 0.00 | PROA |
| 2937 | ATOM | 2937 | HN   | THR | P | 191 | -4.173 | -0.062 | -11.194 | 0.00 | 0.00 | PROA |
| 2938 | ATOM | 2938 | CA   | THR | P | 191 | -3.191 | 1.641  | -10.423 | 0.00 | 0.00 | PROA |
| 2939 | ATOM | 2939 | HA   | THR | P | 191 | -2.275 | 2.146  | -10.693 | 0.00 | 0.00 | PROA |
| 2940 | ATOM | 2940 | CB   | THR | P | 191 | -4.457 | 2.592  | -10.550 | 0.00 | 0.00 | PROA |
| 2941 | ATOM | 2941 | HB   | THR | P | 191 | -4.607 | 2.728  | -11.643 | 0.00 | 0.00 | PROA |
| 2942 | ATOM | 2942 | OG1  | THR | P | 191 | -4.318 | 3.872  | -9.889  | 0.00 | 0.00 | PROA |
| 2943 | ATOM | 2943 | HG1  | THR | P | 191 | -3.507 | 4.298  | -10.176 | 0.00 | 0.00 | PROA |
| 2944 | ATOM | 2944 | CG2  | THR | P | 191 | -5.659 | 1.936  | -9.960  | 0.00 | 0.00 | PROA |
| 2945 | ATOM | 2945 | HG21 | THR | P | 191 | -6.585 | 2.509  | -10.182 | 0.00 | 0.00 | PROA |
| 2946 | ATOM | 2946 | HG22 | THR | P | 191 | -5.523 | 1.764  | -8.871  | 0.00 | 0.00 | PROA |
| 2947 | ATOM | 2947 | HG23 | THR | P | 191 | -5.826 | 0.928  | -10.398 | 0.00 | 0.00 | PROA |
| 2948 | ATOM | 2948 | C    | THR | P | 191 | -3.053 | 1.269  | -8.983  | 0.00 | 0.00 | PROA |
| 2949 | ATOM | 2949 | O    | THR | P | 191 | -2.820 | 2.174  | -8.166  | 0.00 | 0.00 | PROA |
| 2950 | ATOM | 2950 | N    | ALA | P | 192 | -3.102 | -0.012 | -8.652  | 0.00 | 0.00 | PROA |
| 2951 | ATOM | 2951 | HN   | ALA | P | 192 | -3.146 | -0.731 | -9.341  | 0.00 | 0.00 | PROA |
| 2952 | ATOM | 2952 | CA   | ALA | P | 192 | -2.955 | -0.498 | -7.276  | 0.00 | 0.00 | PROA |
| 2953 | ATOM | 2953 | HA   | ALA | P | 192 | -2.952 | 0.355  | -6.614  | 0.00 | 0.00 | PROA |
| 2954 | ATOM | 2954 | CB   | ALA | P | 192 | -4.145 | -1.462 | -6.986  | 0.00 | 0.00 | PROA |
| 2955 | ATOM | 2955 | HB1  | ALA | P | 192 | -5.118 | -0.927 | -6.946  | 0.00 | 0.00 | PROA |
| 2956 | ATOM | 2956 | HB2  | ALA | P | 192 | -4.035 | -1.818 | -5.939  | 0.00 | 0.00 | PROA |
| 2957 | ATOM | 2957 | HB3  | ALA | P | 192 | -4.125 | -2.343 | -7.663  | 0.00 | 0.00 | PROA |
| 2958 | ATOM | 2958 | C    | ALA | P | 192 | -1.610 | -1.191 | -7.044  | 0.00 | 0.00 | PROA |
| 2959 | ATOM | 2959 | O    | ALA | P | 192 | -1.301 | -2.126 | -7.712  | 0.00 | 0.00 | PROA |
| 2960 | ATOM | 2960 | N    | GLY | P | 193 | -0.728 | -0.661 | -6.189  | 0.00 | 0.00 | PROA |
| 2961 | ATOM | 2961 | HN   | GLY | P | 193 | -1.271 | -0.052 | -5.617  | 0.00 | 0.00 | PROA |
| 2962 | ATOM | 2962 | CA   | GLY | P | 193 | 0.681  | -1.002 | -6.032  | 0.00 | 0.00 | PROA |
| 2963 | ATOM | 2963 | HA1  | GLY | P | 193 | 1.213  | -0.224 | -5.505  | 0.00 | 0.00 | PROA |
| 2964 | ATOM | 2964 | HA2  | GLY | P | 193 | 1.006  | -1.171 | -7.048  | 0.00 | 0.00 | PROA |
| 2965 | ATOM | 2965 | C    | GLY | P | 193 | 0.784  | -2.226 | -5.261  | 0.00 | 0.00 | PROA |
| 2966 | ATOM | 2966 | O    | GLY | P | 193 | 1.829  | -2.935 | -5.353  | 0.00 | 0.00 | PROA |
| 2967 | ATOM | 2967 | N    | ILE | P | 194 | -0.198 | -2.422 | -4.342  | 0.00 | 0.00 | PROA |
| 2968 | ATOM | 2968 | HN   | ILE | P | 194 | -0.914 | -1.731 | -4.276  | 0.00 | 0.00 | PROA |
| 2969 | ATOM | 2969 | CA   | ILE | P | 194 | -0.226 | -3.606 | -3.574  | 0.00 | 0.00 | PROA |
| 2970 | ATOM | 2970 | HA   | ILE | P | 194 | 0.673  | -3.694 | -2.981  | 0.00 | 0.00 | PROA |
| 2971 | ATOM | 2971 | CB   | ILE | P | 194 | -1.290 | -3.626 | -2.497  | 0.00 | 0.00 | PROA |
| 2972 | ATOM | 2972 | HB   | ILE | P | 194 | -1.273 | -2.693 | -1.893  | 0.00 | 0.00 | PROA |
| 2973 | ATOM | 2973 | CG2  | ILE | P | 194 | -2.757 | -3.640 | -3.103  | 0.00 | 0.00 | PROA |
| 2974 | ATOM | 2974 | HG21 | ILE | P | 194 | -2.678 | -3.071 | -4.054  | 0.00 | 0.00 | PROA |
| 2975 | ATOM | 2975 | HG22 | ILE | P | 194 | -3.484 | -3.179 | -2.401  | 0.00 | 0.00 | PROA |
| 2976 | ATOM | 2976 | HG23 | ILE | P | 194 | -3.063 | -4.699 | -3.241  | 0.00 | 0.00 | PROA |
| 2977 | ATOM | 2977 | CG1  | ILE | P | 194 | -1.199 | -4.648 | -1.365  | 0.00 | 0.00 | PROA |
| 2978 | ATOM | 2978 | HG11 | ILE | P | 194 | -0.096 | -4.760 | -1.289  | 0.00 | 0.00 | PROA |
| 2979 | ATOM | 2979 | HG12 | ILE | P | 194 | -1.634 | -5.611 | -1.709  | 0.00 | 0.00 | PROA |
| 2980 | ATOM | 2980 | CD   | ILE | P | 194 | -1.813 | -4.225 | -0.024  | 0.00 | 0.00 | PROA |
| 2981 | ATOM | 2981 | HD1  | ILE | P | 194 | -2.903 | -4.043 | -0.146  | 0.00 | 0.00 | PROA |
| 2982 | ATOM | 2982 | HD2  | ILE | P | 194 | -1.401 | -3.291 | 0.414   | 0.00 | 0.00 | PROA |
| 2983 | ATOM | 2983 | HD3  | ILE | P | 194 | -1.650 | -5.091 | 0.652   | 0.00 | 0.00 | PROA |
| 2984 | ATOM | 2984 | C    | ILE | P | 194 | -0.386 | -4.940 | -4.433  | 0.00 | 0.00 | PROA |
| 2985 | ATOM | 2985 | O    | ILE | P | 194 | -0.941 | -4.994 | -5.520  | 0.00 | 0.00 | PROA |
| 2986 | ATOM | 2986 | N    | SER | P | 195 | 0.230  | -6.058 | -3.884  | 0.00 | 0.00 | PROA |
| 2987 | ATOM | 2987 | HN   | SER | P | 195 | 0.810  | -5.859 | -3.098  | 0.00 | 0.00 | PROA |
| 2988 | ATOM | 2988 | CA   | SER | P | 195 | 0.389  | -7.410 | -4.446  | 0.00 | 0.00 | PROA |
| 2989 | ATOM | 2989 | HA   | SER | P | 195 | 0.634  | -7.259 | -5.487  | 0.00 | 0.00 | PROA |
| 2990 | ATOM | 2990 | CB   | SER | P | 195 | 1.583  | -8.163 | -3.953  | 0.00 | 0.00 | PROA |
| 2991 | ATOM | 2991 | HB1  | SER | P | 195 | 1.371  | -8.541 | -2.930  | 0.00 | 0.00 | PROA |
| 2992 | ATOM | 2992 | HB2  | SER | P | 195 | 2.351  | -7.360 | -3.966  | 0.00 | 0.00 | PROA |
| 2993 | ATOM | 2993 | OG   | SER | P | 195 | 2.024  | -9.105 | -4.918  | 0.00 | 0.00 | PROA |

|      |      |      |      |     |   |     |        |         |         |      |      |      |
|------|------|------|------|-----|---|-----|--------|---------|---------|------|------|------|
| 2994 | ATOM | 2994 | HG1  | SER | P | 195 | 1.400  | -9.833  | -4.966  | 0.00 | 0.00 | PROA |
| 2995 | ATOM | 2995 | C    | SER | P | 195 | -0.874 | -8.241  | -4.276  | 0.00 | 0.00 | PROA |
| 2996 | ATOM | 2996 | O    | SER | P | 195 | -1.262 | -8.683  | -3.251  | 0.00 | 0.00 | PROA |
| 2997 | ATOM | 2997 | N    | PHE | P | 196 | -1.518 | -8.485  | -5.434  | 0.00 | 0.00 | PROA |
| 2998 | ATOM | 2998 | HN   | PHE | P | 196 | -1.198 | -8.114  | -6.302  | 0.00 | 0.00 | PROA |
| 2999 | ATOM | 2999 | CA   | PHE | P | 196 | -2.560 | -9.424  | -5.594  | 0.00 | 0.00 | PROA |
| 3000 | ATOM | 3000 | HA   | PHE | P | 196 | -3.032 | -9.595  | -4.638  | 0.00 | 0.00 | PROA |
| 3001 | ATOM | 3001 | CB   | PHE | P | 196 | -3.822 | -8.767  | -6.321  | 0.00 | 0.00 | PROA |
| 3002 | ATOM | 3002 | HB1  | PHE | P | 196 | -4.621 | -9.527  | -6.459  | 0.00 | 0.00 | PROA |
| 3003 | ATOM | 3003 | HB2  | PHE | P | 196 | -3.398 | -8.328  | -7.249  | 0.00 | 0.00 | PROA |
| 3004 | ATOM | 3004 | CG   | PHE | P | 196 | -4.397 | -7.712  | -5.487  | 0.00 | 0.00 | PROA |
| 3005 | ATOM | 3005 | CD1  | PHE | P | 196 | -5.301 | -8.051  | -4.484  | 0.00 | 0.00 | PROA |
| 3006 | ATOM | 3006 | HD1  | PHE | P | 196 | -5.463 | -9.075  | -4.180  | 0.00 | 0.00 | PROA |
| 3007 | ATOM | 3007 | CE1  | PHE | P | 196 | -5.976 | -7.028  | -3.814  | 0.00 | 0.00 | PROA |
| 3008 | ATOM | 3008 | HE1  | PHE | P | 196 | -6.632 | -7.253  | -2.987  | 0.00 | 0.00 | PROA |
| 3009 | ATOM | 3009 | CZ   | PHE | P | 196 | -5.910 | -5.727  | -4.213  | 0.00 | 0.00 | PROA |
| 3010 | ATOM | 3010 | HZ   | PHE | P | 196 | -6.565 | -4.941  | -3.869  | 0.00 | 0.00 | PROA |
| 3011 | ATOM | 3011 | CD2  | PHE | P | 196 | -4.155 | -6.313  | -5.785  | 0.00 | 0.00 | PROA |
| 3012 | ATOM | 3012 | HD2  | PHE | P | 196 | -3.516 | -6.013  | -6.603  | 0.00 | 0.00 | PROA |
| 3013 | ATOM | 3013 | CE2  | PHE | P | 196 | -4.978 | -5.337  | -5.185  | 0.00 | 0.00 | PROA |
| 3014 | ATOM | 3014 | HE2  | PHE | P | 196 | -4.779 | -4.302  | -5.420  | 0.00 | 0.00 | PROA |
| 3015 | ATOM | 3015 | C    | PHE | P | 196 | -2.320 | -10.773 | -6.277  | 0.00 | 0.00 | PROA |
| 3016 | ATOM | 3016 | O    | PHE | P | 196 | -1.658 | -10.896 | -7.341  | 0.00 | 0.00 | PROA |
| 3017 | ATOM | 3017 | N    | ALA | P | 197 | -2.877 | -11.890 | -5.738  | 0.00 | 0.00 | PROA |
| 3018 | ATOM | 3018 | HN   | ALA | P | 197 | -3.510 | -11.702 | -4.991  | 0.00 | 0.00 | PROA |
| 3019 | ATOM | 3019 | CA   | ALA | P | 197 | -2.766 | -13.240 | -6.255  | 0.00 | 0.00 | PROA |
| 3020 | ATOM | 3020 | HA   | ALA | P | 197 | -2.367 | -13.162 | -7.256  | 0.00 | 0.00 | PROA |
| 3021 | ATOM | 3021 | CB   | ALA | P | 197 | -1.944 | -14.120 | -5.389  | 0.00 | 0.00 | PROA |
| 3022 | ATOM | 3022 | HB1  | ALA | P | 197 | -0.959 | -13.634 | -5.220  | 0.00 | 0.00 | PROA |
| 3023 | ATOM | 3023 | HB2  | ALA | P | 197 | -1.606 | -15.104 | -5.779  | 0.00 | 0.00 | PROA |
| 3024 | ATOM | 3024 | HB3  | ALA | P | 197 | -2.334 | -14.333 | -4.370  | 0.00 | 0.00 | PROA |
| 3025 | ATOM | 3025 | C    | ALA | P | 197 | -4.138 | -13.739 | -6.497  | 0.00 | 0.00 | PROA |
| 3026 | ATOM | 3026 | O    | ALA | P | 197 | -5.081 | -13.518 | -5.753  | 0.00 | 0.00 | PROA |
| 3027 | ATOM | 3027 | N    | ILE | P | 198 | -4.480 | -14.390 | -7.680  | 0.00 | 0.00 | PROA |
| 3028 | ATOM | 3028 | HN   | ILE | P | 198 | -3.740 | -14.474 | -8.343  | 0.00 | 0.00 | PROA |
| 3029 | ATOM | 3029 | CA   | ILE | P | 198 | -5.672 | -15.239 | -7.929  | 0.00 | 0.00 | PROA |
| 3030 | ATOM | 3030 | HA   | ILE | P | 198 | -6.507 | -14.633 | -7.609  | 0.00 | 0.00 | PROA |
| 3031 | ATOM | 3031 | CB   | ILE | P | 198 | -5.873 | -15.442 | -9.428  | 0.00 | 0.00 | PROA |
| 3032 | ATOM | 3032 | HB   | ILE | P | 198 | -4.838 | -15.639 | -9.781  | 0.00 | 0.00 | PROA |
| 3033 | ATOM | 3033 | CG2  | ILE | P | 198 | -6.906 | -16.553 | -9.754  | 0.00 | 0.00 | PROA |
| 3034 | ATOM | 3034 | HG21 | ILE | P | 198 | -7.876 | -16.272 | -9.291  | 0.00 | 0.00 | PROA |
| 3035 | ATOM | 3035 | HG22 | ILE | P | 198 | -6.773 | -17.613 | -9.447  | 0.00 | 0.00 | PROA |
| 3036 | ATOM | 3036 | HG23 | ILE | P | 198 | -7.071 | -16.540 | -10.853 | 0.00 | 0.00 | PROA |
| 3037 | ATOM | 3037 | CG1  | ILE | P | 198 | -6.310 | -14.095 | -10.092 | 0.00 | 0.00 | PROA |
| 3038 | ATOM | 3038 | HG11 | ILE | P | 198 | -5.941 | -13.267 | -9.449  | 0.00 | 0.00 | PROA |
| 3039 | ATOM | 3039 | HG12 | ILE | P | 198 | -7.393 | -13.874 | -9.983  | 0.00 | 0.00 | PROA |
| 3040 | ATOM | 3040 | CD   | ILE | P | 198 | -5.774 | -13.810 | -11.488 | 0.00 | 0.00 | PROA |
| 3041 | ATOM | 3041 | HD1  | ILE | P | 198 | -4.666 | -13.841 | -11.571 | 0.00 | 0.00 | PROA |
| 3042 | ATOM | 3042 | HD2  | ILE | P | 198 | -6.235 | -12.854 | -11.815 | 0.00 | 0.00 | PROA |
| 3043 | ATOM | 3043 | HD3  | ILE | P | 198 | -6.164 | -14.643 | -12.111 | 0.00 | 0.00 | PROA |
| 3044 | ATOM | 3044 | C    | ILE | P | 198 | -5.575 | -16.499 | -7.175  | 0.00 | 0.00 | PROA |
| 3045 | ATOM | 3045 | O    | ILE | P | 198 | -4.446 | -16.962 | -7.179  | 0.00 | 0.00 | PROA |
| 3046 | ATOM | 3046 | N    | PRO | P | 199 | -6.478 | -17.090 | -6.531  | 0.00 | 0.00 | PROA |
| 3047 | ATOM | 3047 | CD   | PRO | P | 199 | -7.611 | -16.285 | -6.030  | 0.00 | 0.00 | PROA |
| 3048 | ATOM | 3048 | HD1  | PRO | P | 199 | -8.237 | -16.032 | -6.912  | 0.00 | 0.00 | PROA |
| 3049 | ATOM | 3049 | HD2  | PRO | P | 199 | -7.365 | -15.380 | -5.434  | 0.00 | 0.00 | PROA |
| 3050 | ATOM | 3050 | CA   | PRO | P | 199 | -6.486 | -18.419 | -5.956  | 0.00 | 0.00 | PROA |
| 3051 | ATOM | 3051 | HA   | PRO | P | 199 | -5.781 | -18.417 | -5.138  | 0.00 | 0.00 | PROA |
| 3052 | ATOM | 3052 | CB   | PRO | P | 199 | -7.980 | -18.651 | -5.437  | 0.00 | 0.00 | PROA |
| 3053 | ATOM | 3053 | HB1  | PRO | P | 199 | -7.971 | -19.326 | -4.554  | 0.00 | 0.00 | PROA |
| 3054 | ATOM | 3054 | HB2  | PRO | P | 199 | -8.628 | -19.111 | -6.213  | 0.00 | 0.00 | PROA |
| 3055 | ATOM | 3055 | CG   | PRO | P | 199 | -8.469 | -17.258 | -5.152  | 0.00 | 0.00 | PROA |
| 3056 | ATOM | 3056 | HG1  | PRO | P | 199 | -9.509 | -17.130 | -5.519  | 0.00 | 0.00 | PROA |
| 3057 | ATOM | 3057 | HG2  | PRO | P | 199 | -8.411 | -16.919 | -4.096  | 0.00 | 0.00 | PROA |
| 3058 | ATOM | 3058 | C    | PRO | P | 199 | -6.067 | -19.524 | -6.827  | 0.00 | 0.00 | PROA |
| 3059 | ATOM | 3059 | O    | PRO | P | 199 | -6.526 | -19.712 | -7.934  | 0.00 | 0.00 | PROA |
| 3060 | ATOM | 3060 | N    | SER | P | 200 | -5.226 | -20.448 | -6.317  | 0.00 | 0.00 | PROA |
| 3061 | ATOM | 3061 | HN   | SER | P | 200 | -4.782 | -20.252 | -5.446  | 0.00 | 0.00 | PROA |
| 3062 | ATOM | 3062 | CA   | SER | P | 200 | -4.902 | -21.730 | -6.906  | 0.00 | 0.00 | PROA |
| 3063 | ATOM | 3063 | HA   | SER | P | 200 | -4.348 | -21.544 | -7.814  | 0.00 | 0.00 | PROA |
| 3064 | ATOM | 3064 | CB   | SER | P | 200 | -3.903 | -22.480 | -5.920  | 0.00 | 0.00 | PROA |
| 3065 | ATOM | 3065 | HB1  | SER | P | 200 | -2.897 | -22.025 | -5.795  | 0.00 | 0.00 | PROA |
| 3066 | ATOM | 3066 | HB2  | SER | P | 200 | -3.610 | -23.443 | -6.389  | 0.00 | 0.00 | PROA |

|      |      |      |      |     |   |     |         |         |         |      |      |      |
|------|------|------|------|-----|---|-----|---------|---------|---------|------|------|------|
| 3067 | ATOM | 3067 | OG   | SER | P | 200 | -4.412  | -22.536 | -4.621  | 0.00 | 0.00 | PROA |
| 3068 | ATOM | 3068 | HG1  | SER | P | 200 | -4.524  | -23.434 | -4.301  | 0.00 | 0.00 | PROA |
| 3069 | ATOM | 3069 | C    | SER | P | 200 | -6.098  | -22.574 | -7.154  | 0.00 | 0.00 | PROA |
| 3070 | ATOM | 3070 | O    | SER | P | 200 | -6.130  | -23.290 | -8.184  | 0.00 | 0.00 | PROA |
| 3071 | ATOM | 3071 | N    | ASP | P | 201 | -7.066  | -22.519 | -6.244  | 0.00 | 0.00 | PROA |
| 3072 | ATOM | 3072 | HN   | ASP | P | 201 | -6.752  | -22.330 | -5.317  | 0.00 | 0.00 | PROA |
| 3073 | ATOM | 3073 | CA   | ASP | P | 201 | -8.379  | -23.131 | -6.369  | 0.00 | 0.00 | PROA |
| 3074 | ATOM | 3074 | HA   | ASP | P | 201 | -8.360  | -24.208 | -6.286  | 0.00 | 0.00 | PROA |
| 3075 | ATOM | 3075 | CB   | ASP | P | 201 | -9.361  | -22.574 | -5.334  | 0.00 | 0.00 | PROA |
| 3076 | ATOM | 3076 | HB1  | ASP | P | 201 | -10.368 | -23.023 | -5.470  | 0.00 | 0.00 | PROA |
| 3077 | ATOM | 3077 | HB2  | ASP | P | 201 | -9.530  | -21.503 | -5.573  | 0.00 | 0.00 | PROA |
| 3078 | ATOM | 3078 | CG   | ASP | P | 201 | -8.919  | -22.749 | -3.942  | 0.00 | 0.00 | PROA |
| 3079 | ATOM | 3079 | OD1  | ASP | P | 201 | -9.692  | -22.374 | -2.988  | 0.00 | 0.00 | PROA |
| 3080 | ATOM | 3080 | OD2  | ASP | P | 201 | -7.763  | -23.288 | -3.676  | 0.00 | 0.00 | PROA |
| 3081 | ATOM | 3081 | C    | ASP | P | 201 | -9.053  | -22.867 | -7.770  | 0.00 | 0.00 | PROA |
| 3082 | ATOM | 3082 | O    | ASP | P | 201 | -9.566  | -23.758 | -8.368  | 0.00 | 0.00 | PROA |
| 3083 | ATOM | 3083 | N    | LYS | P | 202 | -8.994  | -21.620 | -8.256  | 0.00 | 0.00 | PROA |
| 3084 | ATOM | 3084 | HN   | LYS | P | 202 | -8.408  | -20.942 | -7.817  | 0.00 | 0.00 | PROA |
| 3085 | ATOM | 3085 | CA   | LYS | P | 202 | -9.644  | -21.110 | -9.496  | 0.00 | 0.00 | PROA |
| 3086 | ATOM | 3086 | HA   | LYS | P | 202 | -10.638 | -21.525 | -9.573  | 0.00 | 0.00 | PROA |
| 3087 | ATOM | 3087 | CB   | LYS | P | 202 | -9.707  | -19.554 | -9.558  | 0.00 | 0.00 | PROA |
| 3088 | ATOM | 3088 | HB1  | LYS | P | 202 | -8.792  | -19.137 | -9.085  | 0.00 | 0.00 | PROA |
| 3089 | ATOM | 3089 | HB2  | LYS | P | 202 | -10.506 | -19.223 | -8.861  | 0.00 | 0.00 | PROA |
| 3090 | ATOM | 3090 | CG   | LYS | P | 202 | -9.715  | -18.921 | -11.002 | 0.00 | 0.00 | PROA |
| 3091 | ATOM | 3091 | HG1  | LYS | P | 202 | -8.788  | -19.171 | -11.562 | 0.00 | 0.00 | PROA |
| 3092 | ATOM | 3092 | HG2  | LYS | P | 202 | -9.634  | -17.819 | -10.885 | 0.00 | 0.00 | PROA |
| 3093 | ATOM | 3093 | CD   | LYS | P | 202 | -10.910 | -19.199 | -11.871 | 0.00 | 0.00 | PROA |
| 3094 | ATOM | 3094 | HD1  | LYS | P | 202 | -10.978 | -20.162 | -12.420 | 0.00 | 0.00 | PROA |
| 3095 | ATOM | 3095 | HD2  | LYS | P | 202 | -10.861 | -18.492 | -12.727 | 0.00 | 0.00 | PROA |
| 3096 | ATOM | 3096 | CE   | LYS | P | 202 | -12.242 | -19.110 | -11.137 | 0.00 | 0.00 | PROA |
| 3097 | ATOM | 3097 | HE1  | LYS | P | 202 | -12.342 | -18.132 | -10.619 | 0.00 | 0.00 | PROA |
| 3098 | ATOM | 3098 | HE2  | LYS | P | 202 | -12.360 | -19.956 | -10.426 | 0.00 | 0.00 | PROA |
| 3099 | ATOM | 3099 | NZ   | LYS | P | 202 | -13.425 | -19.266 | -12.035 | 0.00 | 0.00 | PROA |
| 3100 | ATOM | 3100 | HZ1  | LYS | P | 202 | -13.443 | -18.741 | -12.932 | 0.00 | 0.00 | PROA |
| 3101 | ATOM | 3101 | HZ2  | LYS | P | 202 | -14.274 | -19.039 | -11.478 | 0.00 | 0.00 | PROA |
| 3102 | ATOM | 3102 | HZ3  | LYS | P | 202 | -13.514 | -20.282 | -12.239 | 0.00 | 0.00 | PROA |
| 3103 | ATOM | 3103 | C    | LYS | P | 202 | -8.899  | -21.700 | -10.727 | 0.00 | 0.00 | PROA |
| 3104 | ATOM | 3104 | O    | LYS | P | 202 | -9.495  | -22.238 | -11.648 | 0.00 | 0.00 | PROA |
| 3105 | ATOM | 3105 | N    | ILE | P | 203 | -7.536  | -21.723 | -10.662 | 0.00 | 0.00 | PROA |
| 3106 | ATOM | 3106 | HN   | ILE | P | 203 | -7.086  | -21.359 | -9.850  | 0.00 | 0.00 | PROA |
| 3107 | ATOM | 3107 | CA   | ILE | P | 203 | -6.695  | -22.423 | -11.577 | 0.00 | 0.00 | PROA |
| 3108 | ATOM | 3108 | HA   | ILE | P | 203 | -6.837  | -21.938 | -12.532 | 0.00 | 0.00 | PROA |
| 3109 | ATOM | 3109 | CB   | ILE | P | 203 | -5.236  | -22.384 | -11.230 | 0.00 | 0.00 | PROA |
| 3110 | ATOM | 3110 | HB   | ILE | P | 203 | -4.982  | -23.048 | -10.376 | 0.00 | 0.00 | PROA |
| 3111 | ATOM | 3111 | CG2  | ILE | P | 203 | -4.520  | -22.911 | -12.554 | 0.00 | 0.00 | PROA |
| 3112 | ATOM | 3112 | HG21 | ILE | P | 203 | -4.481  | -24.014 | -12.688 | 0.00 | 0.00 | PROA |
| 3113 | ATOM | 3113 | HG22 | ILE | P | 203 | -3.425  | -22.723 | -12.539 | 0.00 | 0.00 | PROA |
| 3114 | ATOM | 3114 | HG23 | ILE | P | 203 | -5.030  | -22.425 | -13.413 | 0.00 | 0.00 | PROA |
| 3115 | ATOM | 3115 | CG1  | ILE | P | 203 | -4.860  | -21.060 | -10.732 | 0.00 | 0.00 | PROA |
| 3116 | ATOM | 3116 | HG11 | ILE | P | 203 | -5.392  | -20.808 | -9.790  | 0.00 | 0.00 | PROA |
| 3117 | ATOM | 3117 | HG12 | ILE | P | 203 | -5.060  | -20.189 | -11.392 | 0.00 | 0.00 | PROA |
| 3118 | ATOM | 3118 | CD   | ILE | P | 203 | -3.419  | -21.102 | -10.257 | 0.00 | 0.00 | PROA |
| 3119 | ATOM | 3119 | HD1  | ILE | P | 203 | -3.167  | -22.129 | -9.918  | 0.00 | 0.00 | PROA |
| 3120 | ATOM | 3120 | HD2  | ILE | P | 203 | -3.119  | -20.351 | -9.496  | 0.00 | 0.00 | PROA |
| 3121 | ATOM | 3121 | HD3  | ILE | P | 203 | -2.851  | -20.786 | -11.158 | 0.00 | 0.00 | PROA |
| 3122 | ATOM | 3122 | C    | ILE | P | 203 | -7.063  | -23.906 | -11.699 | 0.00 | 0.00 | PROA |
| 3123 | ATOM | 3123 | O    | ILE | P | 203 | -7.260  | -24.378 | -12.791 | 0.00 | 0.00 | PROA |
| 3124 | ATOM | 3124 | N    | LYS | P | 204 | -7.238  | -24.609 | -10.573 | 0.00 | 0.00 | PROA |
| 3125 | ATOM | 3125 | HN   | LYS | P | 204 | -7.030  | -24.066 | -9.762  | 0.00 | 0.00 | PROA |
| 3126 | ATOM | 3126 | CA   | LYS | P | 204 | -7.567  | -25.944 | -10.399 | 0.00 | 0.00 | PROA |
| 3127 | ATOM | 3127 | HA   | LYS | P | 204 | -6.826  | -26.465 | -10.987 | 0.00 | 0.00 | PROA |
| 3128 | ATOM | 3128 | CB   | LYS | P | 204 | -7.620  | -26.356 | -8.923  | 0.00 | 0.00 | PROA |
| 3129 | ATOM | 3129 | HB1  | LYS | P | 204 | -8.233  | -25.705 | -8.263  | 0.00 | 0.00 | PROA |
| 3130 | ATOM | 3130 | HB2  | LYS | P | 204 | -6.559  | -26.422 | -8.599  | 0.00 | 0.00 | PROA |
| 3131 | ATOM | 3131 | CG   | LYS | P | 204 | -8.099  | -27.750 | -8.670  | 0.00 | 0.00 | PROA |
| 3132 | ATOM | 3132 | HG1  | LYS | P | 204 | -7.520  | -28.483 | -9.271  | 0.00 | 0.00 | PROA |
| 3133 | ATOM | 3133 | HG2  | LYS | P | 204 | -9.168  | -27.929 | -8.916  | 0.00 | 0.00 | PROA |
| 3134 | ATOM | 3134 | CD   | LYS | P | 204 | -7.932  | -28.268 | -7.247  | 0.00 | 0.00 | PROA |
| 3135 | ATOM | 3135 | HD1  | LYS | P | 204 | -7.842  | -27.460 | -6.489  | 0.00 | 0.00 | PROA |
| 3136 | ATOM | 3136 | HD2  | LYS | P | 204 | -6.877  | -28.618 | -7.229  | 0.00 | 0.00 | PROA |
| 3137 | ATOM | 3137 | CE   | LYS | P | 204 | -8.858  | -29.401 | -6.994  | 0.00 | 0.00 | PROA |
| 3138 | ATOM | 3138 | HE1  | LYS | P | 204 | -8.844  | -30.189 | -7.776  | 0.00 | 0.00 | PROA |
| 3139 | ATOM | 3139 | HE2  | LYS | P | 204 | -9.864  | -28.962 | -6.819  | 0.00 | 0.00 | PROA |

|      |      |      |      |     |   |     |         |         |         |      |      |      |
|------|------|------|------|-----|---|-----|---------|---------|---------|------|------|------|
| 3140 | ATOM | 3140 | NZ   | LYS | P | 204 | -8.568  | -30.125 | -5.708  | 0.00 | 0.00 | PROA |
| 3141 | ATOM | 3141 | HZ1  | LYS | P | 204 | -9.252  | -30.862 | -5.442  | 0.00 | 0.00 | PROA |
| 3142 | ATOM | 3142 | HZ2  | LYS | P | 204 | -8.601  | -29.436 | -4.929  | 0.00 | 0.00 | PROA |
| 3143 | ATOM | 3143 | HZ3  | LYS | P | 204 | -7.591  | -30.460 | -5.829  | 0.00 | 0.00 | PROA |
| 3144 | ATOM | 3144 | C    | LYS | P | 204 | -8.954  | -26.219 | -11.026 | 0.00 | 0.00 | PROA |
| 3145 | ATOM | 3145 | O    | LYS | P | 204 | -9.140  | -27.221 | -11.788 | 0.00 | 0.00 | PROA |
| 3146 | ATOM | 3146 | N    | LYS | P | 205 | -9.969  | -25.392 | -10.777 | 0.00 | 0.00 | PROA |
| 3147 | ATOM | 3147 | HN   | LYS | P | 205 | -9.774  | -24.591 | -10.216 | 0.00 | 0.00 | PROA |
| 3148 | ATOM | 3148 | CA   | LYS | P | 205 | -11.246 | -25.483 | -11.479 | 0.00 | 0.00 | PROA |
| 3149 | ATOM | 3149 | HA   | LYS | P | 205 | -11.613 | -26.472 | -11.247 | 0.00 | 0.00 | PROA |
| 3150 | ATOM | 3150 | CB   | LYS | P | 205 | -12.279 | -24.476 | -10.890 | 0.00 | 0.00 | PROA |
| 3151 | ATOM | 3151 | HB1  | LYS | P | 205 | -11.962 | -23.430 | -11.092 | 0.00 | 0.00 | PROA |
| 3152 | ATOM | 3152 | HB2  | LYS | P | 205 | -12.166 | -24.593 | -9.791  | 0.00 | 0.00 | PROA |
| 3153 | ATOM | 3153 | CG   | LYS | P | 205 | -13.798 | -24.664 | -11.306 | 0.00 | 0.00 | PROA |
| 3154 | ATOM | 3154 | HG1  | LYS | P | 205 | -13.892 | -24.590 | -12.410 | 0.00 | 0.00 | PROA |
| 3155 | ATOM | 3155 | HG2  | LYS | P | 205 | -14.335 | -23.800 | -10.857 | 0.00 | 0.00 | PROA |
| 3156 | ATOM | 3156 | CD   | LYS | P | 205 | -14.509 | -25.908 | -10.769 | 0.00 | 0.00 | PROA |
| 3157 | ATOM | 3157 | HD1  | LYS | P | 205 | -14.326 | -26.142 | -9.698  | 0.00 | 0.00 | PROA |
| 3158 | ATOM | 3158 | HD2  | LYS | P | 205 | -14.127 | -26.804 | -11.303 | 0.00 | 0.00 | PROA |
| 3159 | ATOM | 3159 | CE   | LYS | P | 205 | -16.083 | -25.843 | -10.904 | 0.00 | 0.00 | PROA |
| 3160 | ATOM | 3160 | HE1  | LYS | P | 205 | -16.551 | -24.912 | -10.522 | 0.00 | 0.00 | PROA |
| 3161 | ATOM | 3161 | HE2  | LYS | P | 205 | -16.406 | -26.729 | -10.317 | 0.00 | 0.00 | PROA |
| 3162 | ATOM | 3162 | NZ   | LYS | P | 205 | -16.527 | -26.111 | -12.269 | 0.00 | 0.00 | PROA |
| 3163 | ATOM | 3163 | HZ1  | LYS | P | 205 | -17.532 | -26.374 | -12.300 | 0.00 | 0.00 | PROA |
| 3164 | ATOM | 3164 | HZ2  | LYS | P | 205 | -15.855 | -26.833 | -12.600 | 0.00 | 0.00 | PROA |
| 3165 | ATOM | 3165 | HZ3  | LYS | P | 205 | -16.329 | -25.287 | -12.872 | 0.00 | 0.00 | PROA |
| 3166 | ATOM | 3166 | C    | LYS | P | 205 | -11.105 | -25.240 | -12.976 | 0.00 | 0.00 | PROA |
| 3167 | ATOM | 3167 | O    | LYS | P | 205 | -11.592 | -26.027 | -13.794 | 0.00 | 0.00 | PROA |
| 3168 | ATOM | 3168 | N    | PHE | P | 206 | -10.312 | -24.273 | -13.445 | 0.00 | 0.00 | PROA |
| 3169 | ATOM | 3169 | HN   | PHE | P | 206 | -9.908  | -23.705 | -12.732 | 0.00 | 0.00 | PROA |
| 3170 | ATOM | 3170 | CA   | PHE | P | 206 | -10.010 | -23.888 | -14.828 | 0.00 | 0.00 | PROA |
| 3171 | ATOM | 3171 | HA   | PHE | P | 206 | -10.987 | -23.728 | -15.261 | 0.00 | 0.00 | PROA |
| 3172 | ATOM | 3172 | CB   | PHE | P | 206 | -9.225  | -22.504 | -14.780 | 0.00 | 0.00 | PROA |
| 3173 | ATOM | 3173 | HB1  | PHE | P | 206 | -8.294  | -22.548 | -14.176 | 0.00 | 0.00 | PROA |
| 3174 | ATOM | 3174 | HB2  | PHE | P | 206 | -9.819  | -21.752 | -14.220 | 0.00 | 0.00 | PROA |
| 3175 | ATOM | 3175 | CG   | PHE | P | 206 | -8.852  | -22.004 | -16.092 | 0.00 | 0.00 | PROA |
| 3176 | ATOM | 3176 | CD1  | PHE | P | 206 | -9.469  | -20.885 | -16.679 | 0.00 | 0.00 | PROA |
| 3177 | ATOM | 3177 | HD1  | PHE | P | 206 | -10.234 | -20.336 | -16.150 | 0.00 | 0.00 | PROA |
| 3178 | ATOM | 3178 | CE1  | PHE | P | 206 | -9.039  | -20.462 | -17.923 | 0.00 | 0.00 | PROA |
| 3179 | ATOM | 3179 | HE1  | PHE | P | 206 | -9.470  | -19.647 | -18.486 | 0.00 | 0.00 | PROA |
| 3180 | ATOM | 3180 | CZ   | PHE | P | 206 | -7.958  | -21.153 | -18.597 | 0.00 | 0.00 | PROA |
| 3181 | ATOM | 3181 | HZ   | PHE | P | 206 | -7.763  | -20.974 | -19.644 | 0.00 | 0.00 | PROA |
| 3182 | ATOM | 3182 | CD2  | PHE | P | 206 | -7.691  | -22.631 | -16.644 | 0.00 | 0.00 | PROA |
| 3183 | ATOM | 3183 | HD2  | PHE | P | 206 | -7.076  | -23.368 | -16.149 | 0.00 | 0.00 | PROA |
| 3184 | ATOM | 3184 | CE2  | PHE | P | 206 | -7.332  | -22.198 | -17.908 | 0.00 | 0.00 | PROA |
| 3185 | ATOM | 3185 | HE2  | PHE | P | 206 | -6.575  | -22.826 | -18.353 | 0.00 | 0.00 | PROA |
| 3186 | ATOM | 3186 | C    | PHE | P | 206 | -9.377  | -25.040 | -15.571 | 0.00 | 0.00 | PROA |
| 3187 | ATOM | 3187 | O    | PHE | P | 206 | -9.758  | -25.279 | -16.686 | 0.00 | 0.00 | PROA |
| 3188 | ATOM | 3188 | N    | LEU | P | 207 | -8.491  | -25.728 | -14.934 | 0.00 | 0.00 | PROA |
| 3189 | ATOM | 3189 | HN   | LEU | P | 207 | -8.081  | -25.319 | -14.122 | 0.00 | 0.00 | PROA |
| 3190 | ATOM | 3190 | CA   | LEU | P | 207 | -7.895  | -26.991 | -15.335 | 0.00 | 0.00 | PROA |
| 3191 | ATOM | 3191 | HA   | LEU | P | 207 | -7.553  | -26.939 | -16.358 | 0.00 | 0.00 | PROA |
| 3192 | ATOM | 3192 | CB   | LEU | P | 207 | -6.628  | -27.427 | -14.512 | 0.00 | 0.00 | PROA |
| 3193 | ATOM | 3193 | HB1  | LEU | P | 207 | -6.358  | -28.487 | -14.708 | 0.00 | 0.00 | PROA |
| 3194 | ATOM | 3194 | HB2  | LEU | P | 207 | -6.984  | -27.403 | -13.459 | 0.00 | 0.00 | PROA |
| 3195 | ATOM | 3195 | CG   | LEU | P | 207 | -5.457  | -26.489 | -14.704 | 0.00 | 0.00 | PROA |
| 3196 | ATOM | 3196 | HG   | LEU | P | 207 | -5.795  | -25.430 | -14.712 | 0.00 | 0.00 | PROA |
| 3197 | ATOM | 3197 | CD1  | LEU | P | 207 | -4.601  | -26.593 | -13.450 | 0.00 | 0.00 | PROA |
| 3198 | ATOM | 3198 | HD11 | LEU | P | 207 | -4.092  | -27.580 | -13.494 | 0.00 | 0.00 | PROA |
| 3199 | ATOM | 3199 | HD12 | LEU | P | 207 | -5.220  | -26.696 | -12.533 | 0.00 | 0.00 | PROA |
| 3200 | ATOM | 3200 | HD13 | LEU | P | 207 | -3.806  | -25.833 | -13.605 | 0.00 | 0.00 | PROA |
| 3201 | ATOM | 3201 | CD2  | LEU | P | 207 | -4.693  | -26.878 | -15.960 | 0.00 | 0.00 | PROA |
| 3202 | ATOM | 3202 | HD21 | LEU | P | 207 | -5.439  | -26.891 | -16.782 | 0.00 | 0.00 | PROA |
| 3203 | ATOM | 3203 | HD22 | LEU | P | 207 | -4.250  | -27.888 | -15.828 | 0.00 | 0.00 | PROA |
| 3204 | ATOM | 3204 | HD23 | LEU | P | 207 | -4.026  | -26.031 | -16.228 | 0.00 | 0.00 | PROA |
| 3205 | ATOM | 3205 | C    | LEU | P | 207 | -8.822  | -28.067 | -15.493 | 0.00 | 0.00 | PROA |
| 3206 | ATOM | 3206 | O    | LEU | P | 207 | -8.786  | -28.785 | -16.548 | 0.00 | 0.00 | PROA |
| 3207 | ATOM | 3207 | N    | THR | P | 208 | -9.660  | -28.301 | -14.439 | 0.00 | 0.00 | PROA |
| 3208 | ATOM | 3208 | HN   | THR | P | 208 | -9.461  | -27.740 | -13.639 | 0.00 | 0.00 | PROA |
| 3209 | ATOM | 3209 | CA   | THR | P | 208 | -10.569 | -29.427 | -14.461 | 0.00 | 0.00 | PROA |
| 3210 | ATOM | 3210 | HA   | THR | P | 208 | -10.008 | -30.304 | -14.750 | 0.00 | 0.00 | PROA |
| 3211 | ATOM | 3211 | CB   | THR | P | 208 | -11.294 | -29.641 | -13.096 | 0.00 | 0.00 | PROA |
| 3212 | ATOM | 3212 | HB   | THR | P | 208 | -11.849 | -28.699 | -12.897 | 0.00 | 0.00 | PROA |

|      |      |      |      |     |   |     |         |         |         |      |      |      |
|------|------|------|------|-----|---|-----|---------|---------|---------|------|------|------|
| 3213 | ATOM | 3213 | OG1  | THR | P | 208 | -10.254 | -29.838 | -12.167 | 0.00 | 0.00 | PROA |
| 3214 | ATOM | 3214 | HG1  | THR | P | 208 | -9.798  | -28.994 | -12.134 | 0.00 | 0.00 | PROA |
| 3215 | ATOM | 3215 | CG2  | THR | P | 208 | -12.262 | -30.890 | -13.026 | 0.00 | 0.00 | PROA |
| 3216 | ATOM | 3216 | HG21 | THR | P | 208 | -13.230 | -30.829 | -13.570 | 0.00 | 0.00 | PROA |
| 3217 | ATOM | 3217 | HG22 | THR | P | 208 | -12.561 | -31.102 | -11.977 | 0.00 | 0.00 | PROA |
| 3218 | ATOM | 3218 | HG23 | THR | P | 208 | -11.774 | -31.836 | -13.342 | 0.00 | 0.00 | PROA |
| 3219 | ATOM | 3219 | C    | THR | P | 208 | -11.603 | -29.327 | -15.508 | 0.00 | 0.00 | PROA |
| 3220 | ATOM | 3220 | O    | THR | P | 208 | -11.803 | -30.365 | -16.226 | 0.00 | 0.00 | PROA |
| 3221 | ATOM | 3221 | N    | GLU | P | 209 | -12.105 | -28.091 | -15.662 | 0.00 | 0.00 | PROA |
| 3222 | ATOM | 3222 | HN   | GLU | P | 209 | -11.755 | -27.384 | -15.053 | 0.00 | 0.00 | PROA |
| 3223 | ATOM | 3223 | CA   | GLU | P | 209 | -13.085 | -27.672 | -16.684 | 0.00 | 0.00 | PROA |
| 3224 | ATOM | 3224 | HA   | GLU | P | 209 | -13.972 | -28.274 | -16.557 | 0.00 | 0.00 | PROA |
| 3225 | ATOM | 3225 | CB   | GLU | P | 209 | -13.616 | -26.189 | -16.448 | 0.00 | 0.00 | PROA |
| 3226 | ATOM | 3226 | HB1  | GLU | P | 209 | -14.316 | -26.086 | -17.305 | 0.00 | 0.00 | PROA |
| 3227 | ATOM | 3227 | HB2  | GLU | P | 209 | -12.776 | -25.463 | -16.482 | 0.00 | 0.00 | PROA |
| 3228 | ATOM | 3228 | CG   | GLU | P | 209 | -14.526 | -25.968 | -15.164 | 0.00 | 0.00 | PROA |
| 3229 | ATOM | 3229 | HG1  | GLU | P | 209 | -13.948 | -26.307 | -14.278 | 0.00 | 0.00 | PROA |
| 3230 | ATOM | 3230 | HG2  | GLU | P | 209 | -15.454 | -26.554 | -15.332 | 0.00 | 0.00 | PROA |
| 3231 | ATOM | 3231 | CD   | GLU | P | 209 | -14.920 | -24.531 | -14.849 | 0.00 | 0.00 | PROA |
| 3232 | ATOM | 3232 | OE1  | GLU | P | 209 | -14.224 | -23.513 | -15.097 | 0.00 | 0.00 | PROA |
| 3233 | ATOM | 3233 | OE2  | GLU | P | 209 | -16.098 | -24.420 | -14.337 | 0.00 | 0.00 | PROA |
| 3234 | ATOM | 3234 | C    | GLU | P | 209 | -12.540 | -27.811 | -18.140 | 0.00 | 0.00 | PROA |
| 3235 | ATOM | 3235 | O    | GLU | P | 209 | -13.095 | -28.397 | -19.081 | 0.00 | 0.00 | PROA |
| 3236 | ATOM | 3236 | N    | SER | P | 210 | -11.315 | -27.337 | -18.296 | 0.00 | 0.00 | PROA |
| 3237 | ATOM | 3237 | HN   | SER | P | 210 | -10.901 | -26.774 | -17.584 | 0.00 | 0.00 | PROA |
| 3238 | ATOM | 3238 | CA   | SER | P | 210 | -10.545 | -27.451 | -19.549 | 0.00 | 0.00 | PROA |
| 3239 | ATOM | 3239 | HA   | SER | P | 210 | -11.065 | -26.948 | -20.351 | 0.00 | 0.00 | PROA |
| 3240 | ATOM | 3240 | CB   | SER | P | 210 | -9.085  | -26.793 | -19.461 | 0.00 | 0.00 | PROA |
| 3241 | ATOM | 3241 | HB1  | SER | P | 210 | -8.614  | -27.095 | -18.501 | 0.00 | 0.00 | PROA |
| 3242 | ATOM | 3242 | HB2  | SER | P | 210 | -9.232  | -25.694 | -19.525 | 0.00 | 0.00 | PROA |
| 3243 | ATOM | 3243 | OG   | SER | P | 210 | -8.177  | -26.990 | -20.542 | 0.00 | 0.00 | PROA |
| 3244 | ATOM | 3244 | HG1  | SER | P | 210 | -7.574  | -27.673 | -20.241 | 0.00 | 0.00 | PROA |
| 3245 | ATOM | 3245 | C    | SER | P | 210 | -10.418 | -28.898 | -20.016 | 0.00 | 0.00 | PROA |
| 3246 | ATOM | 3246 | O    | SER | P | 210 | -10.783 | -29.248 | -21.118 | 0.00 | 0.00 | PROA |
| 3247 | ATOM | 3247 | N    | HSD | P | 211 | -10.002 | -29.819 | -19.100 | 0.00 | 0.00 | PROA |
| 3248 | ATOM | 3248 | HN   | HSD | P | 211 | -9.672  | -29.542 | -18.201 | 0.00 | 0.00 | PROA |
| 3249 | ATOM | 3249 | CA   | HSD | P | 211 | -9.930  | -31.303 | -19.322 | 0.00 | 0.00 | PROA |
| 3250 | ATOM | 3250 | HA   | HSD | P | 211 | -9.225  | -31.508 | -20.114 | 0.00 | 0.00 | PROA |
| 3251 | ATOM | 3251 | CB   | HSD | P | 211 | -9.226  | -31.889 | -18.060 | 0.00 | 0.00 | PROA |
| 3252 | ATOM | 3252 | HB1  | HSD | P | 211 | -9.465  | -32.973 | -17.999 | 0.00 | 0.00 | PROA |
| 3253 | ATOM | 3253 | HB2  | HSD | P | 211 | -9.671  | -31.419 | -17.158 | 0.00 | 0.00 | PROA |
| 3254 | ATOM | 3254 | ND1  | HSD | P | 211 | -6.978  | -32.101 | -19.243 | 0.00 | 0.00 | PROA |
| 3255 | ATOM | 3255 | HD1  | HSD | P | 211 | -7.369  | -32.663 | -19.972 | 0.00 | 0.00 | PROA |
| 3256 | ATOM | 3256 | CG   | HSD | P | 211 | -7.699  | -31.568 | -18.198 | 0.00 | 0.00 | PROA |
| 3257 | ATOM | 3257 | CE1  | HSD | P | 211 | -5.697  | -31.908 | -19.015 | 0.00 | 0.00 | PROA |
| 3258 | ATOM | 3258 | HE1  | HSD | P | 211 | -4.954  | -32.330 | -19.692 | 0.00 | 0.00 | PROA |
| 3259 | ATOM | 3259 | NE2  | HSD | P | 211 | -5.528  | -31.238 | -17.887 | 0.00 | 0.00 | PROA |
| 3260 | ATOM | 3260 | CD2  | HSD | P | 211 | -6.799  | -31.033 | -17.357 | 0.00 | 0.00 | PROA |
| 3261 | ATOM | 3261 | HD2  | HSD | P | 211 | -7.090  | -30.594 | -16.411 | 0.00 | 0.00 | PROA |
| 3262 | ATOM | 3262 | C    | HSD | P | 211 | -11.239 | -31.927 | -19.804 | 0.00 | 0.00 | PROA |
| 3263 | ATOM | 3263 | O    | HSD | P | 211 | -11.183 | -32.822 | -20.638 | 0.00 | 0.00 | PROA |
| 3264 | ATOM | 3264 | N    | ASP | P | 212 | -12.340 | -31.503 | -19.214 | 0.00 | 0.00 | PROA |
| 3265 | ATOM | 3265 | HN   | ASP | P | 212 | -12.418 | -30.650 | -18.703 | 0.00 | 0.00 | PROA |
| 3266 | ATOM | 3266 | CA   | ASP | P | 212 | -13.706 | -31.992 | -19.595 | 0.00 | 0.00 | PROA |
| 3267 | ATOM | 3267 | HA   | ASP | P | 212 | -13.665 | -33.066 | -19.696 | 0.00 | 0.00 | PROA |
| 3268 | ATOM | 3268 | CB   | ASP | P | 212 | -14.735 | -31.277 | -18.700 | 0.00 | 0.00 | PROA |
| 3269 | ATOM | 3269 | HB1  | ASP | P | 212 | -14.824 | -30.209 | -18.991 | 0.00 | 0.00 | PROA |
| 3270 | ATOM | 3270 | HB2  | ASP | P | 212 | -14.474 | -31.392 | -17.626 | 0.00 | 0.00 | PROA |
| 3271 | ATOM | 3271 | CG   | ASP | P | 212 | -16.149 | -31.946 | -18.825 | 0.00 | 0.00 | PROA |
| 3272 | ATOM | 3272 | OD1  | ASP | P | 212 | -16.278 | -33.197 | -19.044 | 0.00 | 0.00 | PROA |
| 3273 | ATOM | 3273 | OD2  | ASP | P | 212 | -17.146 | -31.109 | -18.848 | 0.00 | 0.00 | PROA |
| 3274 | ATOM | 3274 | C    | ASP | P | 212 | -13.996 | -31.620 | -21.091 | 0.00 | 0.00 | PROA |
| 3275 | ATOM | 3275 | O    | ASP | P | 212 | -14.567 | -32.361 | -21.816 | 0.00 | 0.00 | PROA |
| 3276 | ATOM | 3276 | N    | ARG | P | 213 | -13.529 | -30.418 | -21.461 | 0.00 | 0.00 | PROA |
| 3277 | ATOM | 3277 | HN   | ARG | P | 213 | -13.064 | -29.861 | -20.777 | 0.00 | 0.00 | PROA |
| 3278 | ATOM | 3278 | CA   | ARG | P | 213 | -13.707 | -29.914 | -22.874 | 0.00 | 0.00 | PROA |
| 3279 | ATOM | 3279 | HA   | ARG | P | 213 | -14.652 | -30.343 | -23.174 | 0.00 | 0.00 | PROA |
| 3280 | ATOM | 3280 | CB   | ARG | P | 213 | -13.492 | -28.394 | -23.030 | 0.00 | 0.00 | PROA |
| 3281 | ATOM | 3281 | HB1  | ARG | P | 213 | -13.529 | -28.173 | -24.118 | 0.00 | 0.00 | PROA |
| 3282 | ATOM | 3282 | HB2  | ARG | P | 213 | -12.482 | -28.133 | -22.648 | 0.00 | 0.00 | PROA |
| 3283 | ATOM | 3283 | CG   | ARG | P | 213 | -14.608 | -27.663 | -22.292 | 0.00 | 0.00 | PROA |
| 3284 | ATOM | 3284 | HG1  | ARG | P | 213 | -14.676 | -27.985 | -21.231 | 0.00 | 0.00 | PROA |
| 3285 | ATOM | 3285 | HG2  | ARG | P | 213 | -15.433 | -28.171 | -22.835 | 0.00 | 0.00 | PROA |

|      |      |      |      |     |   |     |         |         |         |      |      |      |
|------|------|------|------|-----|---|-----|---------|---------|---------|------|------|------|
| 3286 | ATOM | 3286 | CD   | ARG | P | 213 | -14.756 | -26.132 | -22.528 | 0.00 | 0.00 | PROA |
| 3287 | ATOM | 3287 | HD1  | ARG | P | 213 | -15.680 | -25.769 | -22.029 | 0.00 | 0.00 | PROA |
| 3288 | ATOM | 3288 | HD2  | ARG | P | 213 | -14.910 | -25.933 | -23.610 | 0.00 | 0.00 | PROA |
| 3289 | ATOM | 3289 | NE   | ARG | P | 213 | -13.538 | -25.482 | -22.019 | 0.00 | 0.00 | PROA |
| 3290 | ATOM | 3290 | HE   | ARG | P | 213 | -12.819 | -25.258 | -22.676 | 0.00 | 0.00 | PROA |
| 3291 | ATOM | 3291 | CZ   | ARG | P | 213 | -13.303 | -24.965 | -20.832 | 0.00 | 0.00 | PROA |
| 3292 | ATOM | 3292 | NH1  | ARG | P | 213 | -14.191 | -24.894 | -19.893 | 0.00 | 0.00 | PROA |
| 3293 | ATOM | 3293 | HH11 | ARG | P | 213 | -15.062 | -25.355 | -20.062 | 0.00 | 0.00 | PROA |
| 3294 | ATOM | 3294 | HH12 | ARG | P | 213 | -14.029 | -24.390 | -19.044 | 0.00 | 0.00 | PROA |
| 3295 | ATOM | 3295 | NH2  | ARG | P | 213 | -12.169 | -24.442 | -20.566 | 0.00 | 0.00 | PROA |
| 3296 | ATOM | 3296 | HH21 | ARG | P | 213 | -11.443 | -24.381 | -21.251 | 0.00 | 0.00 | PROA |
| 3297 | ATOM | 3297 | HH22 | ARG | P | 213 | -12.048 | -23.994 | -19.680 | 0.00 | 0.00 | PROA |
| 3298 | ATOM | 3298 | C    | ARG | P | 213 | -12.797 | -30.623 | -23.912 | 0.00 | 0.00 | PROA |
| 3299 | ATOM | 3299 | O    | ARG | P | 213 | -13.258 | -30.843 | -25.054 | 0.00 | 0.00 | PROA |
| 3300 | ATOM | 3300 | N    | GLN | P | 214 | -11.599 | -31.103 | -23.512 | 0.00 | 0.00 | PROA |
| 3301 | ATOM | 3301 | HN   | GLN | P | 214 | -11.259 | -31.042 | -22.577 | 0.00 | 0.00 | PROA |
| 3302 | ATOM | 3302 | CA   | GLN | P | 214 | -10.717 | -31.754 | -24.466 | 0.00 | 0.00 | PROA |
| 3303 | ATOM | 3303 | HA   | GLN | P | 214 | -10.850 | -31.460 | -25.496 | 0.00 | 0.00 | PROA |
| 3304 | ATOM | 3304 | CB   | GLN | P | 214 | -9.238  | -31.443 | -24.225 | 0.00 | 0.00 | PROA |
| 3305 | ATOM | 3305 | HB1  | GLN | P | 214 | -8.671  | -32.019 | -24.987 | 0.00 | 0.00 | PROA |
| 3306 | ATOM | 3306 | HB2  | GLN | P | 214 | -8.965  | -31.766 | -23.198 | 0.00 | 0.00 | PROA |
| 3307 | ATOM | 3307 | CG   | GLN | P | 214 | -9.104  | -29.916 | -24.426 | 0.00 | 0.00 | PROA |
| 3308 | ATOM | 3308 | HG1  | GLN | P | 214 | -9.876  | -29.288 | -23.933 | 0.00 | 0.00 | PROA |
| 3309 | ATOM | 3309 | HG2  | GLN | P | 214 | -9.164  | -29.671 | -25.508 | 0.00 | 0.00 | PROA |
| 3310 | ATOM | 3310 | CD   | GLN | P | 214 | -7.762  | -29.407 | -23.733 | 0.00 | 0.00 | PROA |
| 3311 | ATOM | 3311 | OE1  | GLN | P | 214 | -6.757  | -29.029 | -24.344 | 0.00 | 0.00 | PROA |
| 3312 | ATOM | 3312 | NE2  | GLN | P | 214 | -7.899  | -29.274 | -22.394 | 0.00 | 0.00 | PROA |
| 3313 | ATOM | 3313 | HE21 | GLN | P | 214 | -7.095  | -29.072 | -21.835 | 0.00 | 0.00 | PROA |
| 3314 | ATOM | 3314 | HE22 | GLN | P | 214 | -8.698  | -29.648 | -21.923 | 0.00 | 0.00 | PROA |
| 3315 | ATOM | 3315 | C    | GLN | P | 214 | -10.912 | -33.290 | -24.462 | 0.00 | 0.00 | PROA |
| 3316 | ATOM | 3316 | O    | GLN | P | 214 | -10.640 | -33.946 | -25.446 | 0.00 | 0.00 | PROA |
| 3317 | ATOM | 3317 | N    | ALA | P | 215 | -11.408 | -33.851 | -23.307 | 0.00 | 0.00 | PROA |
| 3318 | ATOM | 3318 | HN   | ALA | P | 215 | -11.713 | -33.279 | -22.550 | 0.00 | 0.00 | PROA |
| 3319 | ATOM | 3319 | CA   | ALA | P | 215 | -11.439 | -35.281 | -23.172 | 0.00 | 0.00 | PROA |
| 3320 | ATOM | 3320 | HA   | ALA | P | 215 | -10.935 | -35.671 | -24.044 | 0.00 | 0.00 | PROA |
| 3321 | ATOM | 3321 | CB   | ALA | P | 215 | -10.563 | -35.758 | -21.984 | 0.00 | 0.00 | PROA |
| 3322 | ATOM | 3322 | HB1  | ALA | P | 215 | -10.288 | -36.834 | -21.992 | 0.00 | 0.00 | PROA |
| 3323 | ATOM | 3323 | HB2  | ALA | P | 215 | -10.939 | -35.473 | -20.978 | 0.00 | 0.00 | PROA |
| 3324 | ATOM | 3324 | HB3  | ALA | P | 215 | -9.609  | -35.189 | -21.996 | 0.00 | 0.00 | PROA |
| 3325 | ATOM | 3325 | C    | ALA | P | 215 | -12.812 | -35.815 | -23.010 | 0.00 | 0.00 | PROA |
| 3326 | ATOM | 3326 | O    | ALA | P | 215 | -13.764 | -35.068 | -22.700 | 0.00 | 0.00 | PROA |
| 3327 | ATOM | 3327 | N    | LYS | P | 216 | -13.008 | -37.132 | -23.176 | 0.00 | 0.00 | PROA |
| 3328 | ATOM | 3328 | HN   | LYS | P | 216 | -12.258 | -37.668 | -23.556 | 0.00 | 0.00 | PROA |
| 3329 | ATOM | 3329 | CA   | LYS | P | 216 | -14.247 | -37.864 | -22.847 | 0.00 | 0.00 | PROA |
| 3330 | ATOM | 3330 | HA   | LYS | P | 216 | -15.117 | -37.263 | -22.626 | 0.00 | 0.00 | PROA |
| 3331 | ATOM | 3331 | CB   | LYS | P | 216 | -14.568 | -38.917 | -23.978 | 0.00 | 0.00 | PROA |
| 3332 | ATOM | 3332 | HB1  | LYS | P | 216 | -15.506 | -39.477 | -23.775 | 0.00 | 0.00 | PROA |
| 3333 | ATOM | 3333 | HB2  | LYS | P | 216 | -13.747 | -39.664 | -24.027 | 0.00 | 0.00 | PROA |
| 3334 | ATOM | 3334 | CG   | LYS | P | 216 | -14.735 | -38.224 | -25.370 | 0.00 | 0.00 | PROA |
| 3335 | ATOM | 3335 | HG1  | LYS | P | 216 | -15.025 | -39.017 | -26.093 | 0.00 | 0.00 | PROA |
| 3336 | ATOM | 3336 | HG2  | LYS | P | 216 | -13.794 | -37.750 | -25.721 | 0.00 | 0.00 | PROA |
| 3337 | ATOM | 3337 | CD   | LYS | P | 216 | -15.743 | -37.064 | -25.430 | 0.00 | 0.00 | PROA |
| 3338 | ATOM | 3338 | HD1  | LYS | P | 216 | -15.594 | -36.535 | -26.396 | 0.00 | 0.00 | PROA |
| 3339 | ATOM | 3339 | HD2  | LYS | P | 216 | -15.416 | -36.298 | -24.695 | 0.00 | 0.00 | PROA |
| 3340 | ATOM | 3340 | CE   | LYS | P | 216 | -17.260 | -37.323 | -25.148 | 0.00 | 0.00 | PROA |
| 3341 | ATOM | 3341 | HE1  | LYS | P | 216 | -17.830 | -36.375 | -25.254 | 0.00 | 0.00 | PROA |
| 3342 | ATOM | 3342 | HE2  | LYS | P | 216 | -17.600 | -37.808 | -24.208 | 0.00 | 0.00 | PROA |
| 3343 | ATOM | 3343 | NZ   | LYS | P | 216 | -17.747 | -38.231 | -26.175 | 0.00 | 0.00 | PROA |
| 3344 | ATOM | 3344 | HZ1  | LYS | P | 216 | -17.274 | -39.146 | -26.032 | 0.00 | 0.00 | PROA |
| 3345 | ATOM | 3345 | HZ2  | LYS | P | 216 | -17.543 | -37.902 | -27.140 | 0.00 | 0.00 | PROA |
| 3346 | ATOM | 3346 | HZ3  | LYS | P | 216 | -18.775 | -38.392 | -26.205 | 0.00 | 0.00 | PROA |
| 3347 | ATOM | 3347 | C    | LYS | P | 216 | -14.040 | -38.598 | -21.555 | 0.00 | 0.00 | PROA |
| 3348 | ATOM | 3348 | OT1  | LYS | P | 216 | -12.859 | -38.828 | -21.161 | 0.00 | 0.00 | PROA |
| 3349 | ATOM | 3349 | OT2  | LYS | P | 216 | -15.065 | -38.790 | -20.799 | 0.00 | 0.00 | PROA |
| 3350 | ATOM | 3350 | CAY  | LYS | P | 217 | 14.788  | -15.591 | -6.202  | 0.00 | 0.00 | PROB |
| 3351 | ATOM | 3351 | HY1  | LYS | P | 217 | 14.320  | -16.574 | -5.978  | 0.00 | 0.00 | PROB |
| 3352 | ATOM | 3352 | HY2  | LYS | P | 217 | 15.673  | -15.978 | -6.750  | 0.00 | 0.00 | PROB |
| 3353 | ATOM | 3353 | HY3  | LYS | P | 217 | 14.156  | -14.875 | -6.769  | 0.00 | 0.00 | PROB |
| 3354 | ATOM | 3354 | CY   | LYS | P | 217 | 15.272  | -14.840 | -4.938  | 0.00 | 0.00 | PROB |
| 3355 | ATOM | 3355 | OY   | LYS | P | 217 | 15.143  | -15.297 | -3.827  | 0.00 | 0.00 | PROB |
| 3356 | ATOM | 3356 | N    | LYS | P | 217 | 15.930  | -13.682 | -5.071  | 0.00 | 0.00 | PROB |
| 3357 | ATOM | 3357 | HN   | LYS | P | 217 | 16.035  | -13.423 | -6.028  | 0.00 | 0.00 | PROB |
| 3358 | ATOM | 3358 | CA   | LYS | P | 217 | 16.255  | -12.723 | -4.052  | 0.00 | 0.00 | PROB |

|      |      |      |      |     |   |     |        |         |        |      |      |      |
|------|------|------|------|-----|---|-----|--------|---------|--------|------|------|------|
| 3359 | ATOM | 3359 | HA   | LYS | P | 217 | 16.415 | -13.315 | -3.163 | 0.00 | 0.00 | PROB |
| 3360 | ATOM | 3360 | CB   | LYS | P | 217 | 17.575 | -12.027 | -4.242 | 0.00 | 0.00 | PROB |
| 3361 | ATOM | 3361 | HB1  | LYS | P | 217 | 17.601 | -11.297 | -3.405 | 0.00 | 0.00 | PROB |
| 3362 | ATOM | 3362 | HB2  | LYS | P | 217 | 17.574 | -11.386 | -5.150 | 0.00 | 0.00 | PROB |
| 3363 | ATOM | 3363 | CG   | LYS | P | 217 | 18.838 | -12.904 | -4.251 | 0.00 | 0.00 | PROB |
| 3364 | ATOM | 3364 | HG1  | LYS | P | 217 | 18.844 | -13.651 | -5.073 | 0.00 | 0.00 | PROB |
| 3365 | ATOM | 3365 | HG2  | LYS | P | 217 | 18.778 | -13.449 | -3.284 | 0.00 | 0.00 | PROB |
| 3366 | ATOM | 3366 | CD   | LYS | P | 217 | 20.142 | -12.066 | -4.403 | 0.00 | 0.00 | PROB |
| 3367 | ATOM | 3367 | HD1  | LYS | P | 217 | 19.979 | -11.117 | -3.848 | 0.00 | 0.00 | PROB |
| 3368 | ATOM | 3368 | HD2  | LYS | P | 217 | 20.214 | -11.783 | -5.475 | 0.00 | 0.00 | PROB |
| 3369 | ATOM | 3369 | CE   | LYS | P | 217 | 21.335 | -12.838 | -3.898 | 0.00 | 0.00 | PROB |
| 3370 | ATOM | 3370 | HE1  | LYS | P | 217 | 21.141 | -13.917 | -4.079 | 0.00 | 0.00 | PROB |
| 3371 | ATOM | 3371 | HE2  | LYS | P | 217 | 21.492 | -12.745 | -2.803 | 0.00 | 0.00 | PROB |
| 3372 | ATOM | 3372 | NZ   | LYS | P | 217 | 22.616 | -12.454 | -4.606 | 0.00 | 0.00 | PROB |
| 3373 | ATOM | 3373 | HZ1  | LYS | P | 217 | 22.858 | -11.480 | -4.333 | 0.00 | 0.00 | PROB |
| 3374 | ATOM | 3374 | HZ2  | LYS | P | 217 | 22.512 | -12.528 | -5.638 | 0.00 | 0.00 | PROB |
| 3375 | ATOM | 3375 | HZ3  | LYS | P | 217 | 23.361 | -13.079 | -4.237 | 0.00 | 0.00 | PROB |
| 3376 | ATOM | 3376 | C    | LYS | P | 217 | 15.139 | -11.688 | -3.809 | 0.00 | 0.00 | PROB |
| 3377 | ATOM | 3377 | O    | LYS | P | 217 | 14.433 | -11.274 | -4.732 | 0.00 | 0.00 | PROB |
| 3378 | ATOM | 3378 | N    | VAL | P | 218 | 15.008 | -11.197 | -2.576 | 0.00 | 0.00 | PROB |
| 3379 | ATOM | 3379 | HN   | VAL | P | 218 | 15.604 | -11.642 | -1.912 | 0.00 | 0.00 | PROB |
| 3380 | ATOM | 3380 | CA   | VAL | P | 218 | 14.007 | -10.247 | -2.168 | 0.00 | 0.00 | PROB |
| 3381 | ATOM | 3381 | HA   | VAL | P | 218 | 13.123 | -10.367 | -2.777 | 0.00 | 0.00 | PROB |
| 3382 | ATOM | 3382 | CB   | VAL | P | 218 | 13.585 | -10.486 | -0.631 | 0.00 | 0.00 | PROB |
| 3383 | ATOM | 3383 | HB   | VAL | P | 218 | 14.525 | -10.465 | -0.039 | 0.00 | 0.00 | PROB |
| 3384 | ATOM | 3384 | CG1  | VAL | P | 218 | 12.521 | -9.584  | -0.009 | 0.00 | 0.00 | PROB |
| 3385 | ATOM | 3385 | HG11 | VAL | P | 218 | 13.021 | -8.599  | 0.104  | 0.00 | 0.00 | PROB |
| 3386 | ATOM | 3386 | HG12 | VAL | P | 218 | 12.069 | -10.016 | 0.909  | 0.00 | 0.00 | PROB |
| 3387 | ATOM | 3387 | HG13 | VAL | P | 218 | 11.819 | -9.397  | -0.850 | 0.00 | 0.00 | PROB |
| 3388 | ATOM | 3388 | CG2  | VAL | P | 218 | 13.084 | -11.945 | -0.461 | 0.00 | 0.00 | PROB |
| 3389 | ATOM | 3389 | HG21 | VAL | P | 218 | 12.303 | -12.099 | -1.236 | 0.00 | 0.00 | PROB |
| 3390 | ATOM | 3390 | HG22 | VAL | P | 218 | 12.528 | -11.963 | 0.500  | 0.00 | 0.00 | PROB |
| 3391 | ATOM | 3391 | HG23 | VAL | P | 218 | 13.871 | -12.721 | -0.348 | 0.00 | 0.00 | PROB |
| 3392 | ATOM | 3392 | C    | VAL | P | 218 | 14.389 | -8.761  | -2.336 | 0.00 | 0.00 | PROB |
| 3393 | ATOM | 3393 | O    | VAL | P | 218 | 15.468 | -8.352  | -1.876 | 0.00 | 0.00 | PROB |
| 3394 | ATOM | 3394 | N    | GLY | P | 219 | 13.561 | -7.920  | -2.996 | 0.00 | 0.00 | PROB |
| 3395 | ATOM | 3395 | HN   | GLY | P | 219 | 12.731 | -8.287  | -3.409 | 0.00 | 0.00 | PROB |
| 3396 | ATOM | 3396 | CA   | GLY | P | 219 | 13.813 | -6.434  | -3.092 | 0.00 | 0.00 | PROB |
| 3397 | ATOM | 3397 | HA1  | GLY | P | 219 | 13.948 | -5.945  | -2.139 | 0.00 | 0.00 | PROB |
| 3398 | ATOM | 3398 | HA2  | GLY | P | 219 | 12.934 | -6.084  | -3.613 | 0.00 | 0.00 | PROB |
| 3399 | ATOM | 3399 | C    | GLY | P | 219 | 15.015 | -6.044  | -3.998 | 0.00 | 0.00 | PROB |
| 3400 | ATOM | 3400 | O    | GLY | P | 219 | 15.768 | -6.910  | -4.391 | 0.00 | 0.00 | PROB |
| 3401 | ATOM | 3401 | N    | LEU | P | 220 | 15.210 | -4.753  | -4.315 | 0.00 | 0.00 | PROB |
| 3402 | ATOM | 3402 | HN   | LEU | P | 220 | 14.661 | -4.052  | -3.867 | 0.00 | 0.00 | PROB |
| 3403 | ATOM | 3403 | CA   | LEU | P | 220 | 16.435 | -4.384  | -5.149 | 0.00 | 0.00 | PROB |
| 3404 | ATOM | 3404 | HA   | LEU | P | 220 | 16.432 | -5.060  | -5.991 | 0.00 | 0.00 | PROB |
| 3405 | ATOM | 3405 | CB   | LEU | P | 220 | 16.312 | -2.938  | -5.720 | 0.00 | 0.00 | PROB |
| 3406 | ATOM | 3406 | HB1  | LEU | P | 220 | 17.011 | -2.761  | -6.565 | 0.00 | 0.00 | PROB |
| 3407 | ATOM | 3407 | HB2  | LEU | P | 220 | 16.517 | -2.263  | -4.861 | 0.00 | 0.00 | PROB |
| 3408 | ATOM | 3408 | CG   | LEU | P | 220 | 14.954 | -2.491  | -6.282 | 0.00 | 0.00 | PROB |
| 3409 | ATOM | 3409 | HG   | LEU | P | 220 | 14.298 | -2.424  | -5.388 | 0.00 | 0.00 | PROB |
| 3410 | ATOM | 3410 | CD1  | LEU | P | 220 | 15.003 | -1.013  | -6.858 | 0.00 | 0.00 | PROB |
| 3411 | ATOM | 3411 | HD11 | LEU | P | 220 | 14.152 | -0.955  | -7.569 | 0.00 | 0.00 | PROB |
| 3412 | ATOM | 3412 | HD12 | LEU | P | 220 | 15.866 | -1.174  | -7.539 | 0.00 | 0.00 | PROB |
| 3413 | ATOM | 3413 | HD13 | LEU | P | 220 | 15.122 | -0.244  | -6.065 | 0.00 | 0.00 | PROB |
| 3414 | ATOM | 3414 | CD2  | LEU | P | 220 | 14.349 | -3.459  | -7.333 | 0.00 | 0.00 | PROB |
| 3415 | ATOM | 3415 | HD21 | LEU | P | 220 | 13.402 | -3.005  | -7.697 | 0.00 | 0.00 | PROB |
| 3416 | ATOM | 3416 | HD22 | LEU | P | 220 | 14.199 | -4.418  | -6.793 | 0.00 | 0.00 | PROB |
| 3417 | ATOM | 3417 | HD23 | LEU | P | 220 | 15.066 | -3.535  | -8.178 | 0.00 | 0.00 | PROB |
| 3418 | ATOM | 3418 | C    | LEU | P | 220 | 17.690 | -4.389  | -4.399 | 0.00 | 0.00 | PROB |
| 3419 | ATOM | 3419 | O    | LEU | P | 220 | 17.694 | -4.434  | -3.149 | 0.00 | 0.00 | PROB |
| 3420 | ATOM | 3420 | N    | ALA | P | 221 | 18.869 | -4.492  | -5.105 | 0.00 | 0.00 | PROB |
| 3421 | ATOM | 3421 | HN   | ALA | P | 221 | 18.826 | -4.586  | -6.097 | 0.00 | 0.00 | PROB |
| 3422 | ATOM | 3422 | CA   | ALA | P | 221 | 20.104 | -4.858  | -4.463 | 0.00 | 0.00 | PROB |
| 3423 | ATOM | 3423 | HA   | ALA | P | 221 | 19.989 | -4.880  | -3.389 | 0.00 | 0.00 | PROB |
| 3424 | ATOM | 3424 | CB   | ALA | P | 221 | 20.741 | -6.082  | -5.089 | 0.00 | 0.00 | PROB |
| 3425 | ATOM | 3425 | HB1  | ALA | P | 221 | 20.835 | -6.023  | -6.194 | 0.00 | 0.00 | PROB |
| 3426 | ATOM | 3426 | HB2  | ALA | P | 221 | 20.146 | -6.974  | -4.799 | 0.00 | 0.00 | PROB |
| 3427 | ATOM | 3427 | HB3  | ALA | P | 221 | 21.731 | -6.246  | -4.613 | 0.00 | 0.00 | PROB |
| 3428 | ATOM | 3428 | C    | ALA | P | 221 | 20.968 | -3.702  | -4.795 | 0.00 | 0.00 | PROB |
| 3429 | ATOM | 3429 | O    | ALA | P | 221 | 20.712 | -2.949  | -5.742 | 0.00 | 0.00 | PROB |
| 3430 | ATOM | 3430 | N    | LEU | P | 222 | 22.075 | -3.534  | -4.048 | 0.00 | 0.00 | PROB |
| 3431 | ATOM | 3431 | HN   | LEU | P | 222 | 22.192 | -4.177  | -3.295 | 0.00 | 0.00 | PROB |

|      |      |      |      |     |   |     |        |        |         |      |      |      |
|------|------|------|------|-----|---|-----|--------|--------|---------|------|------|------|
| 3432 | ATOM | 3432 | CA   | LEU | P | 222 | 22.987 | -2.394 | -4.169  | 0.00 | 0.00 | PROB |
| 3433 | ATOM | 3433 | HA   | LEU | P | 222 | 22.411 | -1.514 | -3.923  | 0.00 | 0.00 | PROB |
| 3434 | ATOM | 3434 | CB   | LEU | P | 222 | 24.186 | -2.453 | -3.192  | 0.00 | 0.00 | PROB |
| 3435 | ATOM | 3435 | HB1  | LEU | P | 222 | 24.770 | -1.512 | -3.274  | 0.00 | 0.00 | PROB |
| 3436 | ATOM | 3436 | HB2  | LEU | P | 222 | 24.829 | -3.321 | -3.453  | 0.00 | 0.00 | PROB |
| 3437 | ATOM | 3437 | CG   | LEU | P | 222 | 23.772 | -2.505 | -1.699  | 0.00 | 0.00 | PROB |
| 3438 | ATOM | 3438 | HG   | LEU | P | 222 | 23.234 | -3.422 | -1.376  | 0.00 | 0.00 | PROB |
| 3439 | ATOM | 3439 | CD1  | LEU | P | 222 | 25.041 | -2.624 | -0.760  | 0.00 | 0.00 | PROB |
| 3440 | ATOM | 3440 | HD11 | LEU | P | 222 | 24.687 | -2.600 | 0.293   | 0.00 | 0.00 | PROB |
| 3441 | ATOM | 3441 | HD12 | LEU | P | 222 | 25.695 | -1.759 | -1.001  | 0.00 | 0.00 | PROB |
| 3442 | ATOM | 3442 | HD13 | LEU | P | 222 | 25.557 | -3.582 | -0.986  | 0.00 | 0.00 | PROB |
| 3443 | ATOM | 3443 | CD2  | LEU | P | 222 | 22.901 | -1.342 | -1.294  | 0.00 | 0.00 | PROB |
| 3444 | ATOM | 3444 | HD21 | LEU | P | 222 | 21.852 | -1.704 | -1.359  | 0.00 | 0.00 | PROB |
| 3445 | ATOM | 3445 | HD22 | LEU | P | 222 | 22.936 | -0.398 | -1.878  | 0.00 | 0.00 | PROB |
| 3446 | ATOM | 3446 | HD23 | LEU | P | 222 | 23.083 | -1.060 | -0.235  | 0.00 | 0.00 | PROB |
| 3447 | ATOM | 3447 | C    | LEU | P | 222 | 23.625 | -2.301 | -5.586  | 0.00 | 0.00 | PROB |
| 3448 | ATOM | 3448 | O    | LEU | P | 222 | 23.768 | -3.227 | -6.326  | 0.00 | 0.00 | PROB |
| 3449 | ATOM | 3449 | N    | GLU | P | 223 | 24.032 | -1.122 | -6.024  | 0.00 | 0.00 | PROB |
| 3450 | ATOM | 3450 | HN   | GLU | P | 223 | 23.884 | -0.281 | -5.510  | 0.00 | 0.00 | PROB |
| 3451 | ATOM | 3451 | CA   | GLU | P | 223 | 24.259 | -0.876 | -7.441  | 0.00 | 0.00 | PROB |
| 3452 | ATOM | 3452 | HA   | GLU | P | 223 | 23.634 | -1.466 | -8.094  | 0.00 | 0.00 | PROB |
| 3453 | ATOM | 3453 | CB   | GLU | P | 223 | 23.906 | 0.600  | -7.827  | 0.00 | 0.00 | PROB |
| 3454 | ATOM | 3454 | HB1  | GLU | P | 223 | 24.324 | 0.882  | -8.817  | 0.00 | 0.00 | PROB |
| 3455 | ATOM | 3455 | HB2  | GLU | P | 223 | 24.463 | 1.202  | -7.078  | 0.00 | 0.00 | PROB |
| 3456 | ATOM | 3456 | CG   | GLU | P | 223 | 22.366 | 0.987  | -7.849  | 0.00 | 0.00 | PROB |
| 3457 | ATOM | 3457 | HG1  | GLU | P | 223 | 22.132 | 2.070  | -7.766  | 0.00 | 0.00 | PROB |
| 3458 | ATOM | 3458 | HG2  | GLU | P | 223 | 21.779 | 0.489  | -7.048  | 0.00 | 0.00 | PROB |
| 3459 | ATOM | 3459 | CD   | GLU | P | 223 | 21.653 | 0.690  | -9.220  | 0.00 | 0.00 | PROB |
| 3460 | ATOM | 3460 | OE1  | GLU | P | 223 | 21.719 | -0.471 | -9.686  | 0.00 | 0.00 | PROB |
| 3461 | ATOM | 3461 | OE2  | GLU | P | 223 | 21.038 | 1.596  | -9.812  | 0.00 | 0.00 | PROB |
| 3462 | ATOM | 3462 | C    | GLU | P | 223 | 25.752 | -1.053 | -7.800  | 0.00 | 0.00 | PROB |
| 3463 | ATOM | 3463 | O    | GLU | P | 223 | 26.626 | -0.660 | -7.051  | 0.00 | 0.00 | PROB |
| 3464 | ATOM | 3464 | N    | LEU | P | 224 | 26.122 | -1.621 | -8.901  | 0.00 | 0.00 | PROB |
| 3465 | ATOM | 3465 | HN   | LEU | P | 224 | 25.398 | -2.021 | -9.458  | 0.00 | 0.00 | PROB |
| 3466 | ATOM | 3466 | CA   | LEU | P | 224 | 27.435 | -2.243 | -9.113  | 0.00 | 0.00 | PROB |
| 3467 | ATOM | 3467 | HA   | LEU | P | 224 | 28.079 | -2.131 | -8.254  | 0.00 | 0.00 | PROB |
| 3468 | ATOM | 3468 | CB   | LEU | P | 224 | 27.293 | -3.745 | -9.395  | 0.00 | 0.00 | PROB |
| 3469 | ATOM | 3469 | HB1  | LEU | P | 224 | 26.935 | -3.812 | -10.445 | 0.00 | 0.00 | PROB |
| 3470 | ATOM | 3470 | HB2  | LEU | P | 224 | 26.755 | -4.310 | -8.604  | 0.00 | 0.00 | PROB |
| 3471 | ATOM | 3471 | CG   | LEU | P | 224 | 28.716 | -4.496 | -9.364  | 0.00 | 0.00 | PROB |
| 3472 | ATOM | 3472 | HG   | LEU | P | 224 | 29.163 | -4.187 | -10.333 | 0.00 | 0.00 | PROB |
| 3473 | ATOM | 3473 | CD1  | LEU | P | 224 | 29.540 | -4.168 | -8.134  | 0.00 | 0.00 | PROB |
| 3474 | ATOM | 3474 | HD11 | LEU | P | 224 | 29.037 | -4.484 | -7.194  | 0.00 | 0.00 | PROB |
| 3475 | ATOM | 3475 | HD12 | LEU | P | 224 | 29.792 | -3.089 | -8.217  | 0.00 | 0.00 | PROB |
| 3476 | ATOM | 3476 | HD13 | LEU | P | 224 | 30.530 | -4.663 | -8.227  | 0.00 | 0.00 | PROB |
| 3477 | ATOM | 3477 | CD2  | LEU | P | 224 | 28.359 | -6.076 | -9.449  | 0.00 | 0.00 | PROB |
| 3478 | ATOM | 3478 | HD21 | LEU | P | 224 | 27.787 | -6.404 | -8.555  | 0.00 | 0.00 | PROB |
| 3479 | ATOM | 3479 | HD22 | LEU | P | 224 | 29.188 | -6.802 | -9.587  | 0.00 | 0.00 | PROB |
| 3480 | ATOM | 3480 | HD23 | LEU | P | 224 | 27.706 | -6.331 | -10.311 | 0.00 | 0.00 | PROB |
| 3481 | ATOM | 3481 | C    | LEU | P | 224 | 28.190 | -1.506 | -10.274 | 0.00 | 0.00 | PROB |
| 3482 | ATOM | 3482 | O    | LEU | P | 224 | 27.800 | -1.572 | -11.438 | 0.00 | 0.00 | PROB |
| 3483 | ATOM | 3483 | N    | GLU | P | 225 | 29.308 | -0.860 | -9.885  | 0.00 | 0.00 | PROB |
| 3484 | ATOM | 3484 | HN   | GLU | P | 225 | 29.552 | -0.726 | -8.928  | 0.00 | 0.00 | PROB |
| 3485 | ATOM | 3485 | CA   | GLU | P | 225 | 30.231 | -0.419 | -10.908 | 0.00 | 0.00 | PROB |
| 3486 | ATOM | 3486 | HA   | GLU | P | 225 | 29.715 | 0.242  | -11.589 | 0.00 | 0.00 | PROB |
| 3487 | ATOM | 3487 | CB   | GLU | P | 225 | 31.318 | 0.437  | -10.261 | 0.00 | 0.00 | PROB |
| 3488 | ATOM | 3488 | HB1  | GLU | P | 225 | 32.005 | 0.863  | -11.023 | 0.00 | 0.00 | PROB |
| 3489 | ATOM | 3489 | HB2  | GLU | P | 225 | 31.854 | -0.177 | -9.505  | 0.00 | 0.00 | PROB |
| 3490 | ATOM | 3490 | CG   | GLU | P | 225 | 30.583 | 1.706  | -9.658  | 0.00 | 0.00 | PROB |
| 3491 | ATOM | 3491 | HG1  | GLU | P | 225 | 29.636 | 1.403  | -9.162  | 0.00 | 0.00 | PROB |
| 3492 | ATOM | 3492 | HG2  | GLU | P | 225 | 30.462 | 2.391  | -10.525 | 0.00 | 0.00 | PROB |
| 3493 | ATOM | 3493 | CD   | GLU | P | 225 | 31.421 | 2.337  | -8.614  | 0.00 | 0.00 | PROB |
| 3494 | ATOM | 3494 | OE1  | GLU | P | 225 | 32.476 | 2.923  | -8.935  | 0.00 | 0.00 | PROB |
| 3495 | ATOM | 3495 | OE2  | GLU | P | 225 | 30.965 | 2.261  | -7.442  | 0.00 | 0.00 | PROB |
| 3496 | ATOM | 3496 | C    | GLU | P | 225 | 30.869 | -1.434 | -11.726 | 0.00 | 0.00 | PROB |
| 3497 | ATOM | 3497 | O    | GLU | P | 225 | 31.213 | -2.535 | -11.326 | 0.00 | 0.00 | PROB |
| 3498 | ATOM | 3498 | N    | ALA | P | 226 | 31.078 | -1.088 | -12.971 | 0.00 | 0.00 | PROB |
| 3499 | ATOM | 3499 | HN   | ALA | P | 226 | 30.649 | -0.312 | -13.426 | 0.00 | 0.00 | PROB |
| 3500 | ATOM | 3500 | CA   | ALA | P | 226 | 31.820 | -1.802 | -14.004 | 0.00 | 0.00 | PROB |
| 3501 | ATOM | 3501 | HA   | ALA | P | 226 | 31.613 | -2.860 | -13.929 | 0.00 | 0.00 | PROB |
| 3502 | ATOM | 3502 | CB   | ALA | P | 226 | 31.399 | -1.258 | -15.323 | 0.00 | 0.00 | PROB |
| 3503 | ATOM | 3503 | HB1  | ALA | P | 226 | 31.802 | -0.240 | -15.511 | 0.00 | 0.00 | PROB |
| 3504 | ATOM | 3504 | HB2  | ALA | P | 226 | 30.299 | -1.117 | -15.262 | 0.00 | 0.00 | PROB |
